# Supplementary material for: Synthesis of 5H-chromeno[3,4-c]pyridine derivatives through ruthenium-catalyzed [2 + 2 + 2] cycloaddition
Source: Royal Society of Chemistry journal article supplement (doi:10.1039/d2qo01918c), 2023-01-01
Supplement: d2qo01918c1.pdf [file d2qo01918c1.pdf]

## SUPPORTING INFORMATION

### Synthesis of 5*H*-chromeno[3,4-*c*]pyridine derivatives through ruthenium-catalyzed [2+2+2] cycloaddition

William Parisot,<sup>a</sup> Steve Huvelle,<sup>a</sup> Mansour Haddad,<sup>a</sup> Guillaume Lefèvre,<sup>a</sup> Phannarath Phansavath,<sup>a</sup> Virginie Ratovelomanana-Vidal<sup>a\*</sup>

<sup>a</sup> PSL University, Chimie ParisTech, CNRS, Institute of Chemistry for Life and Health Sciences, CSB2D Team, 11 Rue Pierre et Marie Curie, 75005 Paris, France

e-mail : virginie.vidal@chimieparistech.psl.eu

#### Table of Contents

|      |                                                                               |       |
|------|-------------------------------------------------------------------------------|-------|
| I.   | General informations                                                          | S-2   |
| II.  | Cyanamide syntheses                                                           | S-3   |
| III. | General procedures                                                            | S-3   |
| 1.   | Sonogashira coupling (general procedure A)                                    | S-3   |
| 2.   | Ether formation and alkyne deprotection (general procedure B)                 | S-4   |
| 3.   | [2+2+2] Cycloaddition method (general procedure C)                            | S-4   |
| 4.   | [2+2+2] Cycloaddition method (general procedure D)                            | S-5   |
| IV.  | Optimization                                                                  | S-6   |
| V.   | Characterization                                                              | S-7   |
| 1.   | Characterization of 2-((trimethylsilyl)ethynyl)phenol derivatives             | S-7   |
| 2.   | Characterization of 1-ethynyl-2-(prop-2-yn-1-yloxy)benzene derivatives        | S-15  |
| 3.   | Characterization of 5 <i>H</i> -chromeno[3,4- <i>c</i> ]pyridines derivatives | S-25  |
| VI.  | NMR spectra                                                                   | S-49  |
| VII. | X-Ray crystallographic data for compound <b>3aa</b>                           | S-128 |
| 1.   | X-Ray crystal structure determination                                         | S-128 |
| 2.   | Crystal data for <b>3aa</b>                                                   | S-129 |

## I. General informations

**General Methods:** Unless otherwise stated, all reactions were carried out under argon. Thin-layer chromatography was performed on silica gel 60 F254 on aluminum plates (Merck). Visualization was accomplished using UV light ( $\lambda = 254$  or  $365$  nm) or by staining in basic  $\text{KMnO}_4$ , p-anisaldehyde or phosphomolybdic acid solution followed by heating. Flash chromatography was performed under positive air pressure using silica gel ( $40\text{-}63\ \mu\text{m}$ ) from VWR Chemical.

**Instrumentation and Data Acquisition:** Proton ( $^1\text{H}$ ), carbon ( $^{13}\text{C}$ ) and fluorine ( $^{19}\text{F}$ ) nuclear magnetic resonance spectra were recorded on Bruker AV400 instrument, using non deuterated chloroform ( $^1\text{H}$  NMR :  $\delta = 7.26$  ppm) as an internal chemical shift reference for Proton ( $^1\text{H}$ ) and ( $^{13}\text{C}$  NMR :  $\delta = 77.16$  ppm) relative to the centre line of the triplet as an internal chemical shift reference for Carbon ( $^{13}\text{C}$ ). Melting points (M. p.) were determined on a Köfler melting point apparatus. High resolution mass spectrometric (HRMS) analyses were measured on Q-ToF 6545LTQ-Orbitrap (Agilent) by ESI or APCI. Low resolution mass spectrometric (LRMS) analyses were measured on DSQII (ThermoScientific) by DEP.

**Data Reporting:** The presentation of  $^1\text{H}$  NMR spectroscopic data: magnet strength, analysis solvent, chemical shift ( $\delta$ , ppm), multiplicity (s = singlet, d = doublet, t = triplet, q = quartet, quint. = quintuplet, sext. = sextuplet sept. = septuplet, m = multiplet, b = broad, app. = apparent), *J*-coupling constants (Hz), and integration. The regioisomeric ratio was determined by integration of  $^1\text{H}$ -NMR signals. The response factor of both regioisomers was assumed to be equal in each case. For regioisomeric ratios greater than 90:10 only the major isomer is depicted in the following NMR characterizations. HRMS were given for the mixture of regioisomers of 5*H*-chromeno[3,4-*c*]pyridines and 5*H*-chromeno[4,3-*c*]pyridines.

**Materials:** All reagents were purchased in the highest purity grade available from Acros Organics, Sigma-Aldrich, Tokyo Chemical Industry, Alfa Aesar and Fluorochem. They were used without further purification unless otherwise specified. Argon and liquid nitrogen were provided from Air liquid. Anhydrous solvents were freshly distilled before use or obtained from solvent purificator Pure Solv™. Petroleum ether, pentane, ethyl acetate, dichloromethane and diethyl ether were used as received. Anhydrous 2-methyltetrahydrofuran was obtained by distillation over sodium in the presence of benzophenone under argon prior to use.

**Safety Notice:** Cyanamides are volatile and toxic. Propargyl bromide is toxic and carcinogenic. Iodophenols reagents are known to be harmful. All these reagents must be handled under a fume hood and with gloves.

## II. Cyanamide syntheses

Dimethylcyanamide **2a**, pyrrolidine carbonitrile **2d**, cyanamide **2f** and 4-morpholinecarbonitrile **2e** were purchased from commercial sources. Cyanamides **2b**, **2c** and **2g** were prepared according to reported procedures.<sup>1,2</sup>

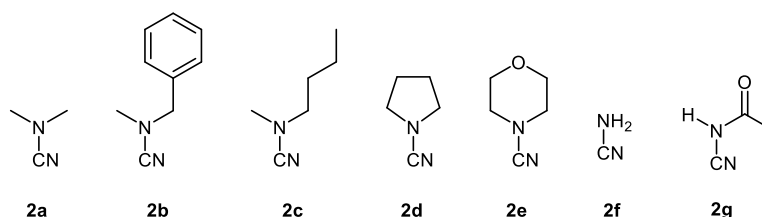

## III. General procedures

### 1. Sonogashira coupling (general procedure A)

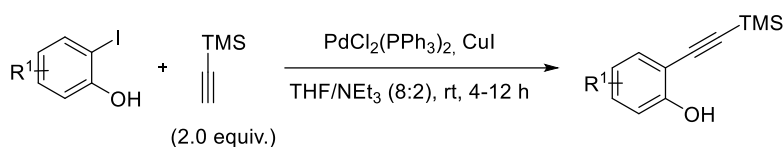

In a 100 mL round bottom flask was suspended PdCl<sub>2</sub>(PPh<sub>3</sub>)<sub>2</sub> (255 mg, 0.36 mmol, 0.02 equiv.) and CuI (139 mg, 0.73 mmol, 0.04 equiv.) in 26 mL of THF/NEt<sub>3</sub> (8:2). Under argon, a solution of 2-iodophenol (4.00 g, 18.2 mmol, 1.0 equiv.) and trimethylsilyl acetylene (5.03 mL, 36.4 mmol, 2.0 equiv.) in 26 mL of THF/NEt<sub>3</sub> (8:2) was added, the solution turns to black. The resulting mixture was stirred overnight at room temperature. A saturated aqueous solution of NH<sub>4</sub>Cl (30 mL) was added and the aqueous layer was extracted with EtOAc (3 x 30 mL). The combined organic layers were dried over MgSO<sub>4</sub>, filtered, and the filtrate was concentrated under reduced pressure. The residue was purified by flash column chromatography (SiO<sub>2</sub>, cyclohexane/EtOAc ; 100:0 to 95:5) affording 2-((trimethylsilyl)ethynyl)phenol as a yellow oil (3.36 g, 17.6 mmol, 97%).

<sup>1</sup> Auvinet, A-L.; Ez-Zoubir, M.; Vitale, M. R.; Brown, J. A.; Michelet, V.; Ratovelomanana-Vidal, V.; *ChemSusChem*, 2012, **5**, 1888.

<sup>2</sup> Shirota, F. N.; Nagasawa, H. T.; Kwon, C. H., Demaster E. G.; *Drug Metab. Dispos.*, 1984, **12**, 337.

## 2. Ether formation and alkyne deprotection (general procedure B)

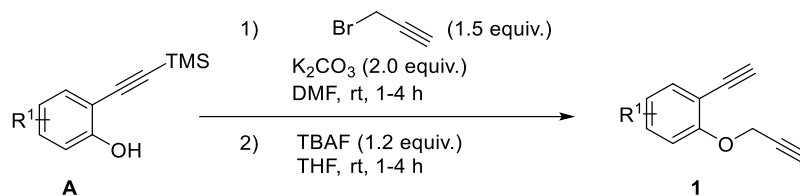

In a 100 mL round bottom flask 2-((trimethylsilyl)ethynyl)phenol (3.36 g, 17.6 mmol, 1.0 equiv.), and  $\text{K}_2\text{CO}_3$  (4.88 g, 35.3 mmol, 2.0 equiv.) were mixed in 50 mL of anhydrous DMF at room temperature. Under argon, propargyl bromide (80 % in toluene) (2.93 mL, 26.4 mmol, 1.5 equiv.) was added and the brownish mixture was stirred 4 h at room temperature. When the reaction was complete (NMR monitoring), 20 mL of water was added. The resulting solution was extracted with  $\text{Et}_2\text{O}$  (3 x 20 mL). The combined organic layers were washed with brine (20 mL), dried over  $\text{MgSO}_4$  and the filtrate was concentrated under reduced pressure. The residue was dissolved in 50 mL of THF and tetrabutylammonium fluoride (5.52 g, 21.1 mmol, 1.2 equiv.) was added, the solution turns to black. The solution was stirred 1 h at room temperature, then water (20 mL) was added. The resulting solution was extracted with DCM (3 x 20 mL). The combined organic layers were dried over  $\text{MgSO}_4$ , filtered and the filtrate was concentrated under reduced pressure. The residue was purified by flash column chromatography ( $\text{SiO}_2$ , cyclohexane/ $\text{EtOAc}$  ; 95:5) affording **1a** as a pale-yellow solid (2.31 g, 14.8 mmol, 84%).

## 3. [2+2+2] Cycloaddition method (general procedure C)

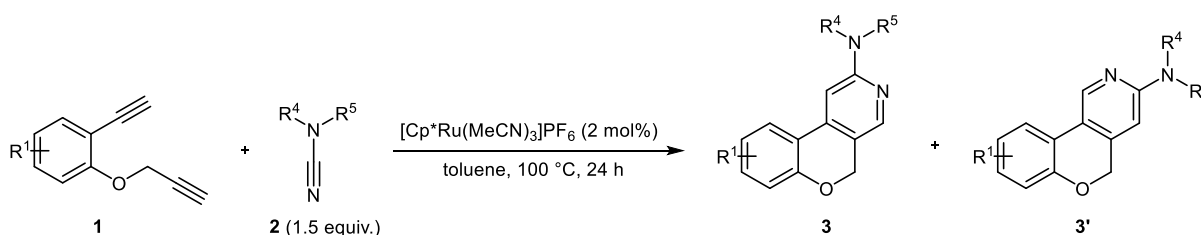

A sealed tube was charged with  $[\text{Cp}^*\text{Ru}(\text{MeCN})_3]\text{PF}_6$  (6.5 mg,  $1.28 \times 10^{-2}$  mmol, 0.02 equiv.) and dimethylcyanamide **2a** (76  $\mu\text{L}$ , 0.96 mmol, 1.5 equiv.) was added. Under argon a solution of diyne **1a** (100 mg, 0.64 mmol, 1.0 equiv.) in 1.8 mL of anhydrous toluene was added. The tube was sealed, and the reaction mixture was stirred vigorously at 100 °C for 24 h. When the reaction was complete, the solvent was removed under reduced pressure. The residue was purified by flash column chromatography ( $\text{SiO}_2$ , petroleum ether/ $\text{EtOAc}$  ; 80:20), then the excess of cyanamide was distilled off with a Kugelrohr distillation apparatus, affording a mixture of **3aa** and **3aa'** as a pale-brown oil (121 mg, 535  $\mu\text{mol}$ , 84%).

#### 4. [2+2+2] Cycloaddition method (general procedure D)

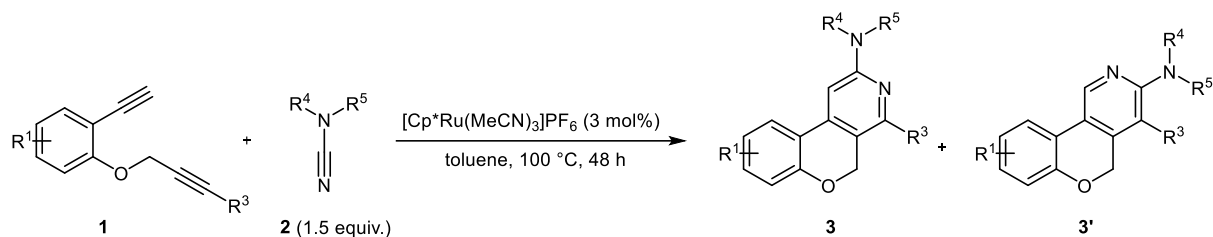

A sealed tube was charged with  $[\text{Cp}^*\text{Ru}(\text{MeCN})_3]\text{PF}_6$  (9.7 mg,  $1.92 \times 10^{-2}$  mmol, 0.03 equiv.) and 4-morpholinecarbonitrile **2e** (97  $\mu\text{L}$ , 0.96 mmol, 1.5 equiv.) was added. Under argon a solution of diyne **1a** (100 mg, 0.64 mmol, 1.0 equiv.) in 1.8 mL of anhydrous toluene was added. The tube was sealed, and the reaction mixture was stirred vigorously at  $100\text{ }^\circ\text{C}$  for 48 h. When the reaction was complete, the solvent was removed under reduced pressure. The residue was purified by flash column chromatography ( $\text{SiO}_2$ , petroleum ether/EtOAc ; 80:20 to 70:30), then the excess of cyanamide was distilled off with a Kugelrohr distillation apparatus, affording a mixture of **3ae** and **3ae'** as a pale-brown oil (148 mg, 552  $\mu\text{mol}$ , 86%).

#### Proposed mechanism<sup>3</sup>

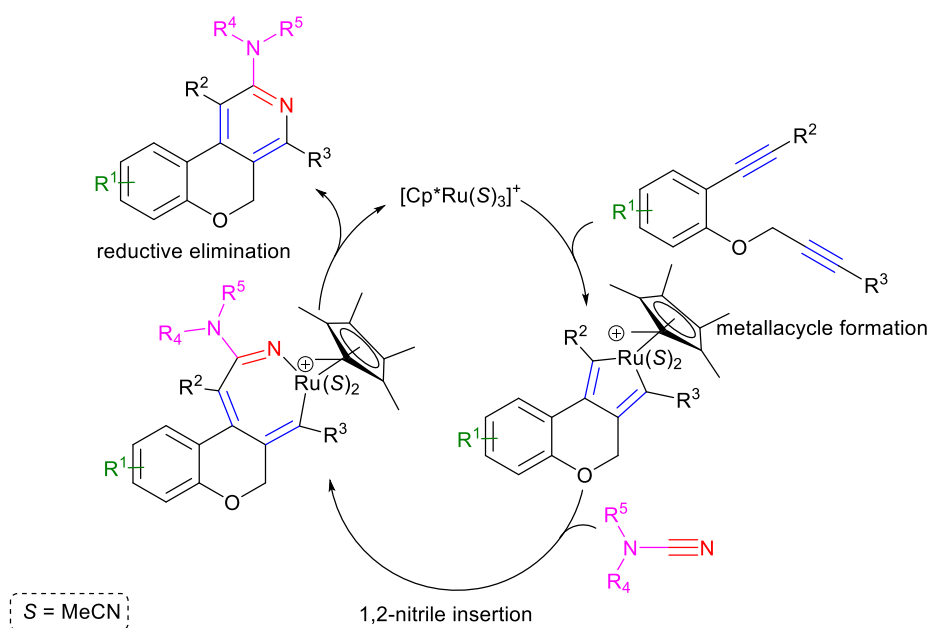

<sup>3</sup> Roglans, A.; Pla-Quintana, A.; Solà, M. ; *Chem. Rev.*, 2021, **121**, 1894.

#### IV. Optimization

| Entry | Catalyst (mol %)                                                                                       | Solvent | T°C | Conv. (%) | Yield (%) | Ratio |
|-------|--------------------------------------------------------------------------------------------------------|---------|-----|-----------|-----------|-------|
| 1     | [Cp*RuCl] <sub>4</sub><br>(2 mol%)                                                                     | Toluene | 100 | 100       | 43        | >99/1 |
| 2     | [Cp*Ru(MeCN) <sub>3</sub> ]PF <sub>6</sub><br>(5 mol%)                                                 | Toluene | 100 | 100       | 83        | 96/4  |
| 3     | Cp*Ru(cod)Cl<br>(5 mol%)                                                                               | Toluene | 100 | 92        | 37        | >99/1 |
| 4     | [Rh(cod)Cl] <sub>2</sub><br>(5 mol%)                                                                   | Toluene | 100 | 100       | 0         | ND    |
| 5     | RuCl <sub>3</sub> .nH <sub>2</sub> O<br>(5 mol%)                                                       | Toluene | 100 | 58        | 33        | 92/8  |
| 6     | [Ir(cod)Cl] <sub>2</sub><br>(5 mol%)                                                                   | Toluene | 100 | 100       | 0         | ND    |
| 7     | In(OTf) <sub>3</sub><br>(5 mol%)                                                                       | Toluene | 100 | 0         | 0         | ND    |
| 8     | Fe(acac) <sub>3</sub><br>(5 mol%)                                                                      | Toluene | 100 | 0         | 0         | ND    |
| 9     | FeSO <sub>4</sub><br>(5 mol%)                                                                          | Toluene | 100 | 0         | 0         | ND    |
| 10    | CpCo(CO) <sub>2</sub><br>(5 mol%)                                                                      | Toluene | 100 | 26        | 21        | 76/24 |
| 11    | [Cp <sub>2</sub> Ni] (5 mol%),<br>Xantphos (10 mol%),<br>Cs <sub>2</sub> CO <sub>3</sub> (1.00 equiv.) | Toluene | 100 | 0         | 0         | ND    |
| 12    | [Cp*Ru(MeCN) <sub>3</sub> ]PF <sub>6</sub><br>(2 mol%)                                                 | Toluene | 100 | 100       | 84        | 96/4  |
| 13    | [Cp*Ru(MeCN) <sub>3</sub> ]PF <sub>6</sub><br>(2 mol%)                                                 | DCE     | 80  | 54        | 40        | 97/3  |
| 14    | [Cp*Ru(MeCN) <sub>3</sub> ]PF <sub>6</sub><br>(2 mol%)                                                 | DCM     | 50  | 43        | 26        | 97/3  |
| 15    | [Cp*Ru(MeCN) <sub>3</sub> ]PF <sub>6</sub><br>(2 mol%)                                                 | EtOH    | 80  | 10        | 9         | 92/8  |
| 16    | [Cp*Ru(MeCN) <sub>3</sub> ]PF <sub>6</sub><br>(2 mol%)                                                 | MeTHF   | 80  | 71        | 61        | 96/4  |
| 17    | [Cp*Ru(MeCN) <sub>3</sub> ]PF <sub>6</sub><br>(1 mol%)                                                 | Toluene | 100 | 62        | 61        | 96/4  |
| 18    | [Cp*Ru(MeCN) <sub>3</sub> ]PF <sub>6</sub><br>(2 mol%)                                                 | Toluene | 90  | 95        | 77        | 96/4  |

Table 1 : Optimization table

## V. Characterization

### 1. Characterization of 2-((trimethylsilyl)ethynyl)phenol derivatives

#### 2-((trimethylsilyl)ethynyl)phenol (A1)

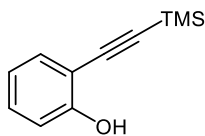

**A1**

Chemical Formula: C<sub>11</sub>H<sub>14</sub>OSi

Prepared according to the general procedure **A** using 2-iodophenol (4.00 g, 18.2 mmol, 1.0 equiv.). After flash column chromatography (cyclohexane/EtOAc ; 100:0 to 95:5), the expected product was obtained as a yellow oil (3.36 g, 17.6 mmol, 97%).

<sup>1</sup>H NMR (400 MHz, CDCl<sub>3</sub>) δ 7.34 (dd, *J* = 7.8, 1.7 Hz, 1H), 7.27-7.22 (m, 1H), 6.94 (dd, *J* = 8.3, 0.8 Hz, 1H), 6.85 (td, *J* = 7.6, 1.1 Hz, 1H), 5.84 (s, 1H), 0.29 (s, 9H).

<sup>13</sup>C NMR (101 MHz, CDCl<sub>3</sub>) δ 157.2, 131.7, 130.8, 120.4, 114.7, 109.6, 102.5, 99.1, 0.1 (3C).

LRMS (EI): Calculated for C<sub>11</sub>H<sub>14</sub>OSi [M-CH<sub>3</sub>]<sup>+</sup> : 175 (100) found 175 (100).

#### 4-methyl-2-((trimethylsilyl)ethynyl)phenol (A2)

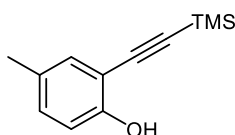

**A2**

Chemical Formula: C<sub>12</sub>H<sub>16</sub>OSi

Prepared according to the general procedure **A** using 2-iodo-4-methylphenol (1.65 g, 7.05 mmol, 1.0 equiv.). After flash column chromatography (cyclohexane/EtOAc ; 100:0 to 95:5), the expected product was obtained as a yellow oil (1.40 g, 6.85 mmol, 97%).

<sup>1</sup>H NMR (400 MHz, CDCl<sub>3</sub>) δ 7.16 (d, *J* = 2.1 Hz, 1H), 7.02 (dd, *J* = 8.4, 2.2 Hz, 1H), 6.84 (d, *J* = 8.4, Hz, 1H), 5.69 (s, 1H), 2.24 (s, 3H), 0.28 (s, 9H).

<sup>13</sup>C NMR (101 MHz, CDCl<sub>3</sub>) δ 155.1, 131.8, 131.6, 129.5, 114.4, 109.2, 102.0, 99.4, 20.4, 0.1 (3C).

LRMS (EI): Calculated for C<sub>12</sub>H<sub>16</sub>OSi [M-CH<sub>3</sub>]<sup>+</sup> : 189 (100) found 189 (100).

#### 4-isopropyl-2-((trimethylsilyl)ethynyl)phenol (A3)

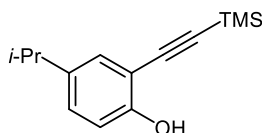

**A3**

Chemical Formula: C<sub>14</sub>H<sub>20</sub>OSi

Prepared according to the general procedure **A** using 2-iodo-4-isopropylphenol (5.80 g, 22.1 mmol, 1.0 equiv.). After flash column chromatography (cyclohexane/EtOAc ; 98:2), the expected product was obtained as a yellow oil (3.72 g, 16.0 mmol, 72%).

<sup>1</sup>H NMR (400 MHz, CDCl<sub>3</sub>) δ 7.21 (d, *J* = 2.3 Hz, 1H), 7.08 (dd, *J* = 8.5, 2.3 Hz, 1H), 6.88 (d, *J* = 8.5 Hz, 1H), 5.81 (s, 1H), 2.80 (sept., *J* = 6.9 Hz, 1H), 1.28 (app. s, 3H), 1.27 (app. s, 3H), 0.29 (s, 9H).

<sup>13</sup>C NMR (101 MHz, CDCl<sub>3</sub>) δ 155.3, 140.6, 129.2, 129.1, 114.6, 109.2, 101.6, 99.7, 33.3, 24.1 (2C), 0.1 (3C).

LRMS (EI): Calculated for C<sub>14</sub>H<sub>20</sub>OSi [M-CH<sub>3</sub>]<sup>+</sup> : 217 (100) found 217 (100).

#### 4-(*tert*-butyl)-2-((trimethylsilyl)ethynyl)phenol (A4)

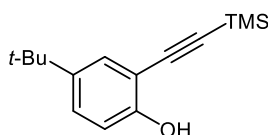

**A4**

Chemical Formula: C<sub>15</sub>H<sub>22</sub>OSi

Prepared according to the general procedure **A** using 4-(*tert*-butyl)-2-iodophenol (2.90 g, 10.5 mmol, 1.0 equiv.). After flash column chromatography (cyclohexane/EtOAc ; 98:2 to 95:5), the expected product was obtained a white solid (2.15 g, 8.72 mmol, 83%).

<sup>1</sup>H NMR (400 MHz, CDCl<sub>3</sub>) δ 7.34 (d, *J* = 2.4 Hz, 1H), 7.27 (dd, *J* = 8.6, 2.5 Hz, 1H), 6.87 (d, *J* = 8.6 Hz, 1H), 5.68 (s, 1H), 1.27 (s, 9H), 0.28 (s, 9H).

<sup>13</sup>C NMR (101 MHz, CDCl<sub>3</sub>) δ 155.0, 143.1, 128.3, 128.1, 114.2, 108.8, 101.8, 99.7, 34.2, 31.5 (3C), 0.2 (3C).

M.p. : 71-73 °C

LRMS (EI): Calculated for C<sub>15</sub>H<sub>22</sub>OSi [M-CH<sub>3</sub>]<sup>+</sup> : 231 (100) found 231 (100).



### 3-((trimethylsilyl)ethynyl)-[1,1'-biphenyl]-4-ol (A5)

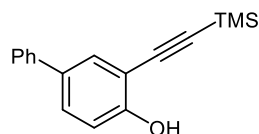

**A5**

Chemical Formula: C<sub>17</sub>H<sub>18</sub>OSi

Prepared according to the general procedure **A** using 3-iodo-[1,1'-biphenyl]-4-ol (7.50 g, 25.3 mmol, 1.0 equiv.). After flash column chromatography (petroleum ether/EtOAc ; 98:2), the expected product was obtained as yellow solid (3.40 g, 12.8 mmol, 51%).

<sup>1</sup>H NMR (400 MHz, CDCl<sub>3</sub>) δ 7.65 (d, *J* = 2.3 Hz, 1H), 7.58-7.55 (m, 2H), 7.52 (dd, *J* = 8.6, 2.3 Hz, 1H), 7.46-7.43 (m, 2H), 7.38-7.33 (m, 1H), 7.07 (d, *J* = 8.5 Hz, 1H), 5.97 (s, 1H), 0.37 (s, 9H).

<sup>13</sup>C NMR (101 MHz, CDCl<sub>3</sub>) δ 156.6, 140.1, 133.7, 130.2, 129.6, 128.9 (2C), 127.1, 126.7 (2C), 115.1, 110.0, 102.6, 99.1, 0.1 (3C).

**M.p.** : 98-100 °C

**LRMS (EI)**: Calculated for C<sub>17</sub>H<sub>18</sub>OSi [M-CH<sub>3</sub>]<sup>+</sup> : 251 (100) found 251 (100).

### 4-fluoro-2-((trimethylsilyl)ethynyl)phenol (A6)

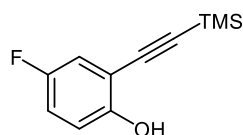

**A6**

Chemical Formula: C<sub>11</sub>H<sub>13</sub>FOSi

Prepared according to the general procedure **A** using 2-iodo-4-fluorophenol (4.20 g, 17.6 mmol, 1.0 equiv.). After flash column chromatography (cyclohexane/EtOAc ; 100:0 to 98:2), the expected product was obtained as a yellow oil (3.21 g, 15.4 mmol, 87%).

<sup>1</sup>H NMR (400 MHz, CDCl<sub>3</sub>) δ 7.04 (dd, *J* = 8.5, 3.0 Hz, 1H), 6.97-6.92 (m, 1H), 6.89-6.86 (m, 1H), 5.76 (s, 1H), 0.29 (s, 9H).

<sup>13</sup>C NMR (101 MHz, CDCl<sub>3</sub>) δ 156.1 (d, *J* = 232.3 Hz), 153.5, 117.7 (d, *J* = 31.3 Hz), 117.5 (d, *J* = 33.3 Hz), 115.7 (d, *J* = 9.1 Hz), 110.2 (d, *J* = 9.1 Hz), 103.3, 9.1 (d, *J* = 2.0 Hz), 0.1 (3C).

<sup>19</sup>F NMR (376.5 MHz, CDCl<sub>3</sub>) δ = -123.8.

**LRMS (EI)**: Calculated for C<sub>11</sub>H<sub>13</sub>FOSi [M-CH<sub>3</sub>]<sup>+</sup> : 193 (100) found 193 (100).

#### 4-chloro-2-((trimethylsilyl)ethynyl)phenol (A7)

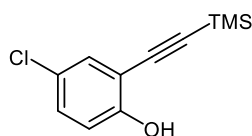

**A7**

Chemical Formula: C<sub>11</sub>H<sub>13</sub>ClOSi

Prepared according to the general procedure **A** using 2-iodo-4-chlorophenol (3.98 g, 15.6 mmol, 1.0 equiv.). After flash column chromatography (petroleum ether/DCM ; 90:10), the expected product was obtained as a yellow oil (3.14 g, 13.9 mmol, 89%).

**<sup>1</sup>H NMR** (400 MHz, CDCl<sub>3</sub>) δ 7.31 (d, *J* = 2.6 Hz, 1H), 7.19 (dd, *J* = 8.8, 2.6 Hz, 1H), 6.87 (d, *J* = 8.8 Hz, 1H), 5.78 (s, 1H), 0.28 (s, 9H).

**<sup>13</sup>C NMR** (101 MHz, CDCl<sub>3</sub>) δ 155.8, 131.0, 130.8, 125.0, 116.0, 111.1, 103.9, 97.7, 0.1 (3C).

**LRMS (EI)**: Calculated for C<sub>11</sub>H<sub>13</sub>ClOSi [M-CH<sub>3</sub>]<sup>+</sup> : 209 (100), 211 (32) found 209 (100), 211 (48).

#### 4-bromo-2-((trimethylsilyl)ethynyl)phenol (A8)

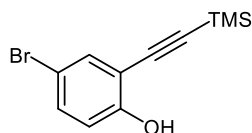

**A8**

Chemical Formula: C<sub>11</sub>H<sub>13</sub>BrOSi

Prepared according to the general procedure **A** using 2-iodo-4-bromophenol (4.90 g, 16.4 mmol, 1.0 equiv.). After flash column chromatography (cyclohexane/EtOAc ; 96:4 to 95:5), the expected product was obtained as a yellow oil (4.12 g, 15.3 mmol, 93%).

**<sup>1</sup>H NMR** (400 MHz, CDCl<sub>3</sub>) δ 7.46 (d, *J* = 2.4 Hz, 1H), 7.32 (dd, *J* = 8.8, 2.4 Hz, 1H), 6.82 (d, *J* = 8.8 Hz, 1H), 5.83 (s, 1H), 0.28 (s, 9H).

**<sup>13</sup>C NMR** (101 MHz, CDCl<sub>3</sub>) δ 156.3, 133.9, 133.6, 116.5, 111.9, 111.7, 104.0, 97.5, 0.0 (3C).

**LRMS (EI)**: Calculated for C<sub>11</sub>H<sub>13</sub>BrOSi [M-CH<sub>3</sub>]<sup>+</sup> : 253 (100), 255 (97) found 253 (100), 255 (97).

#### 4-hydroxy-3-((trimethylsilyl)ethynyl)benzonitrile (A9)

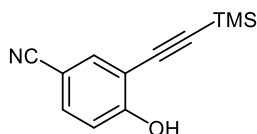

**A9**

Chemical Formula: C<sub>12</sub>H<sub>13</sub>NOSi

Prepared according to the general procedure **A** using 4-hydroxy-3-iodobenzonitrile (3.50 g, 14.3 mmol, 1.0 equiv.). After flash column chromatography (petroleum ether/DCM ; 70:30 to 60:40), the expected product was obtained as a white solid (2.02 g, 9.38 mmol, 66%).

<sup>1</sup>H NMR (400 MHz, CDCl<sub>3</sub>) δ 7.64 (d, *J* = 1.9 Hz, 1H), 7.49 (dd, *J* = 8.6, 2.0 Hz, 1H), 7.00 (d, *J* = 8.6 Hz, 1H), 6.50 (s, 1H), 0.28 (s, 9H).

<sup>13</sup>C NMR (101 MHz, CDCl<sub>3</sub>) δ 160.4, 136.1, 134.2, 118.3, 116.0, 111.4, 105.0, 104.1, 96.4, 0.2 (3C).

LRMS (EI): Calculated for C<sub>12</sub>H<sub>13</sub>NOSi [M-CH<sub>3</sub>]<sup>+</sup> : 200 (100) found 200 (100).

#### 5-methoxy-2-((trimethylsilyl)ethynyl)phenol (A10)

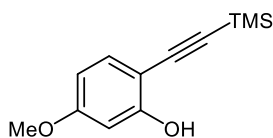

**A10**

Chemical Formula: C<sub>12</sub>H<sub>16</sub>O<sub>2</sub>Si

Prepared according to the general procedure **A** using 2-iodo-5-methoxyphenol (3.20 g, 12.8 mmol, 1.0 equiv.). After flash column chromatography (petroleum ether/EtOAc ; 98:2), the expected product was obtained as a yellow oil (2.38 g, 10.8 mmol, 84%).

<sup>1</sup>H NMR (400 MHz, CDCl<sub>3</sub>) δ 7.25 (d, *J* = 8.6 Hz, 1H), 6.50 (d, *J* = 2.4 Hz, 1H), 6.43 (dd, *J* = 8.6, 2.5 Hz, 1H), 5.91 (s, 1H), 3.78 (s, 3H), 0.28 (s, 9H).

<sup>13</sup>C NMR (101 MHz, CDCl<sub>3</sub>) δ 161.8, 158.7, 132.5, 107.3, 102.0, 101.0, 100.0, 99.3, 55.4, 0.2 (3C).

LRMS (EI): Calculated for C<sub>12</sub>H<sub>16</sub>O<sub>2</sub>Si [M-CH<sub>3</sub>]<sup>+</sup> : 205 (100) found 205 (100).

### 1-((trimethylsilyl)ethynyl)naphthalen-2-ol (A11)

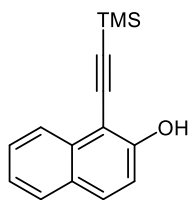

**A11**

Chemical Formula: C<sub>15</sub>H<sub>16</sub>OSi

Prepared according to the general procedure **A** using 1-iodonaphthalen-2-ol (4.00 g, 14.8 mmol, 1.0 equiv.). After flash column chromatography (petroleum ether/DCM ; 80:20), the expected product was obtained as a yellow oil (562 mg, 2.34 mmol, 16%).

<sup>1</sup>H NMR (400 MHz, CDCl<sub>3</sub>) δ 8.12 (d, *J* = 8.3 Hz, 1H), 7.78-7.74 (m, 2H), 7.58-7.54 (m, 1H), 7.40-7.36 (m, 1H), 7.21 (d, *J* = 9.0 Hz, 1H), 6.24 (s, 1H), 0.39 (s, 9H).

<sup>13</sup>C NMR (101 MHz, CDCl<sub>3</sub>) δ 156.9, 133.7, 131.0, 128.5, 128.4, 127.6, 125.0, 124.2, 116.3, 107.5, 102.9, 97.6, 0.3 (3C).

HRMS (ESI): Calculated for C<sub>15</sub>H<sub>16</sub>OSi [M+H]<sup>+</sup> : 241.1043 (100) found 241.1039 (100).

### *tert*-butyldimethyl((6-((trimethylsilyl)ethynyl)benzo[d][1,3]dioxol-5-yl)oxy)silane (A12)

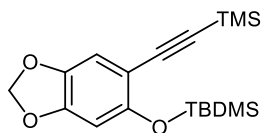

**A12**

Chemical Formula: C<sub>18</sub>H<sub>28</sub>O<sub>3</sub>Si<sub>2</sub>

Prepared according to the general procedure **A** using *tert*-butyl ((6-iodobenzo[d][1,3]dioxol-5-yl)oxy)dimethylsilane (5.00 g, 13.2 mmol, 1.0 equiv.). After flash column chromatography (petroleum ether/EtOAc ; 98:2), the expected product was obtained as an orange oil (3.11 g, 8.92 mmol, 68%).

<sup>1</sup>H NMR (400 MHz, CDCl<sub>3</sub>) δ 6.81 (s, 1H), 6.34 (s, 1H), 5.90 (s, 2H), 1.03 (s, 9H), 0.23 (s, 6H), 0.22 (s, 9H).

<sup>13</sup>C NMR (101 MHz, CDCl<sub>3</sub>) δ 153.0, 148.8, 141.6, 111.9, 107.3, 102.7, 101.9, 101.6, 96.2, 25.9 (3C), 18.4, 0.2 (3C), -4.2 (2C).

LRMS (CI/NH<sub>3</sub>): Calculated for C<sub>18</sub>H<sub>28</sub>O<sub>3</sub>Si<sub>2</sub> [M+H]<sup>+</sup> : 349 (100) found 349 (100).

### 2,4-dimethyl-6-((trimethylsilyl)ethynyl)phenol (A13)

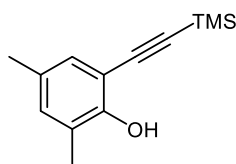

**A13**

Chemical Formula: C<sub>13</sub>H<sub>18</sub>OSi

Prepared according to the general procedure **A** using 2-iodo-4,6-dimethylphenol (3.00 g, 12.1 mmol, 1.0 equiv.). After flash column chromatography (petroleum ether/DCM ; 95:5 to 80:20), the expected product was obtained as a yellow oil (2.58 g, 11.8 mmol, 97%).

<sup>1</sup>H NMR (400 MHz, CDCl<sub>3</sub>) δ 7.04 (s, 1H), 6.94 (s, 1H), 5.84 (s, 1H), 2.27 (s, 3H), 2.24 (s, 3H), 0.33 (s, 9H).

<sup>13</sup>C NMR (101 MHz, CDCl<sub>3</sub>) δ 153.3, 133.0, 129.0, 128.9, 123.6, 108.6, 101.5, 99.9, 20.3, 15.9, 0.1 (3C).

LRMS (Cl/NH<sub>3</sub>): Calculated for C<sub>13</sub>H<sub>18</sub>OSi [M+H]<sup>+</sup> : 219 (100) found 219 (100).

### 3-bromo-2,4-dimethyl-6-((trimethylsilyl)ethynyl)phenol (A14)

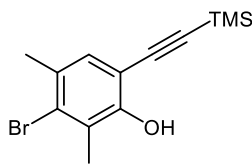

**A14**

Chemical Formula: C<sub>13</sub>H<sub>17</sub>BrOSi

Prepared according to a modification of the general procedure **A** using 3-bromo-6-iodo-2,4-dimethylphenol (3.00 g, 9.17 mmol, 1.0 equiv.), ethynyltrimethylsilane (5.08 mL, 36.7 mmol, 4.0 equiv.), the reaction was refluxed in THF/Et<sub>3</sub>N (8/2) for 6 hours. After flash column chromatography (cyclohexane/EtOAc ; 95:5), the expected product was obtained as a yellow oil (2.58 g, 8.68 mmol, 95%).

<sup>1</sup>H NMR (400 MHz, CDCl<sub>3</sub>) δ 6.71 (s, 1H), 5.83 (s, 1H), 2.52 (s, 3H), 2.36 (s, 3H), 0.32 (s, 9H).

<sup>13</sup>C NMR (101 MHz, CDCl<sub>3</sub>) δ 155.9, 140.5, 140.0, 117.8, 114.1, 109.0, 106.0, 98.1, 24.4, 22.4, 0.1 (3C).

LRMS (Cl/NH<sub>3</sub>): Calculated for C<sub>13</sub>H<sub>17</sub>BrOSi [M+H]<sup>+</sup> : 297 (100), 299 (97) found 297 (100), 299 (97).

## 2-(phenylethynyl)phenol (A15)

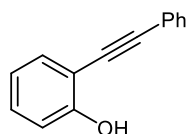

**A15**

Chemical Formula: C<sub>14</sub>H<sub>10</sub>O

Prepared according to a modification of the general procedure **A** using 2-iodophenol (5.00 g, 22.7 mmol, 1.0 equiv.) and phenylacetylene (4.99 mL, 45.5 mmol, 2.0 equiv.). After flash column chromatography (petroleum ether/DCM ; 99.5:0.5 to 98:2), the expected product was obtained as a yellow solid (1.62 g, 8.34 mmol, 37%).

<sup>1</sup>H NMR (400 MHz, CDCl<sub>3</sub>) δ 7.57-7.55 (m, 2H), 7.45 (dd, *J* = 7.7, 1.6 Hz, 1H), 7.40-7.37 (m, 3H), 7.31-7.27 (m, 1H), 7.01 (dd, *J* = 8.3, 0.8 Hz, 1H), 6.93 (dt, *J* = 7.6, 1.1 Hz, 1H), 5.90 (s, 1H).

<sup>13</sup>C NMR (101 MHz, CDCl<sub>3</sub>) δ 156.6, 131.8, 131.7 (2C), 130.6, 128.9, 128.6 (2C), 122.5, 120.6, 114.9, 109.7, 96.5, 83.2.

**M.p.** : 71-73 °C

**LRMS (EI)**: Calculated for C<sub>14</sub>H<sub>10</sub>O [M+H]<sup>+</sup> : 195 (100) found 195 (100).

## 2. Characterization of 1-ethynyl-2-(prop-2-yn-1-yloxy)benzene derivatives

### 1-ethynyl-2-(prop-2-yn-1-yloxy)benzene (1a)

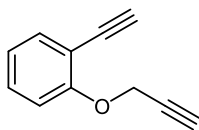

1a

Chemical Formula: C<sub>11</sub>H<sub>8</sub>O

Prepared according to the general procedure **B** using **A1** (3.36 g, 17.6 mmol, 1.0 equiv.). After flash column chromatography (cyclohexane/EtOAc ; 95:5), the expected product was obtained as a pale-yellow solid (2.31 g, 14.8 mmol, 84%).

<sup>1</sup>H NMR (400 MHz, CDCl<sub>3</sub>) δ 7.49 (dd, *J* = 7.6, 1.7 Hz, 1H), 7.34 (ddd, *J* = 8.5, 7.5, 1.7 Hz, 1H), 7.06 (dd, *J* = 8.4, 0.7 Hz, 1H), 6.97 (td, *J* = 7.5, 1.0 Hz, 1H), 4.80 (d, *J* = 2.4 Hz, 2H), 3.31 (s, 1H), 2.53 (t, *J* = 2.4 Hz, 1H).

<sup>13</sup>C NMR (101 MHz, CDCl<sub>3</sub>) δ 158.7, 134.4, 130.2, 121.6, 112.9, 112.2, 81.6, 79.8, 78.3, 76.2, 56.6.

M.p. = 47-49 °C

HRMS (ESI): Calculated for C<sub>11</sub>H<sub>8</sub>O [M+H]<sup>+</sup> : 157.0648 (100) found 157.0648 (100).

### 2-ethynyl-4-methyl-1-(prop-2-yn-1-yloxy)benzene (1b)

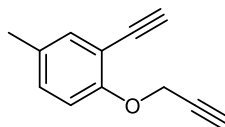

1b

Chemical Formula: C<sub>12</sub>H<sub>10</sub>O

Prepared according to the general procedure **B** using **A2** (1.40 g, 6.85 mmol, 1.0 equiv.). After flash column chromatography (cyclohexane/EtOAc ; 95:5), the expected product was obtained as a pale-yellow solid (793 mg, 4.66 mmol, 68%).

<sup>1</sup>H NMR (400 MHz, CDCl<sub>3</sub>) δ 7.28 (d, *J* = 2.1 Hz, 1H), 7.11 (dd, *J* = 8.4, 2.2 Hz, 1H), 6.94 (d, *J* = 8.5 Hz, 1H), 4.77 (d, *J* = 2.4 Hz, 2H), 3.28 (s, 1H), 2.51 (t, *J* = 2.4 Hz, 1H), 2.27 (s, 3H).

<sup>13</sup>C NMR (101 MHz, CDCl<sub>3</sub>) δ 156.6, 134.7, 131.0, 130.7, 113.1, 111.9, 81.3, 80.0, 78.5, 76.0, 56.7, 20.4.

M.p. = 60-62 °C

HRMS (ESI): Calculated for C<sub>12</sub>H<sub>10</sub>O [M+H]<sup>+</sup> : 171.0804 (100) found 171.0805 (100).

### 2-ethynyl-4-isopropyl-1-(prop-2-yn-1-yloxy)benzene (1c)

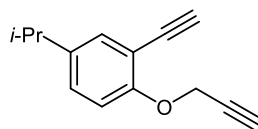

1c

Chemical Formula: C<sub>14</sub>H<sub>14</sub>O

Prepared according to the general procedure **B** using **A3** (2.00 g, 8.61 mmol, 1.0 equiv.). After flash column chromatography (cyclohexane/EtOAc ; 95:5), the expected product was obtained as white fluffy needles (1.36 g, 6.86 mmol, 80%).

<sup>1</sup>H NMR (400 MHz, CDCl<sub>3</sub>) δ 7.35 (d, *J* = 2.4 Hz, 1H), 7.17 (dd, *J* = 8.6, 2.4 Hz, 1H), 6.97 (d, *J* = 8.6 Hz, 1H), 4.76 (d, *J* = 2.4 Hz, 2H), 3.30 (s, 1H), 2.84 (sept., *J* = 6.9 Hz, 1H), 2.52 (t, *J* = 2.4 Hz, 1H), 1.22 (app. s, 3H), 1.21 (app. s, 3H).

<sup>13</sup>C NMR (101 MHz, CDCl<sub>3</sub>) δ 156.7, 141.9, 132.1, 128.1, 112.9, 111.7, 81.1, 80.2, 78.5, 75.9, 56.6, 33.1, 24.0 (2C).

M.p. = 96-98 °C

HRMS (ESI): Calculated for C<sub>14</sub>H<sub>14</sub>O [M+H]<sup>+</sup> : 199.1117 (100) found 199.1121 (100).

### 4-(tert-butyl)-2-ethynyl-1-(prop-2-yn-1-yloxy)benzene (1d)

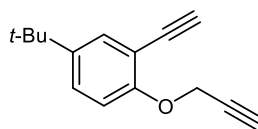

1d

Chemical Formula: C<sub>15</sub>H<sub>16</sub>O

Prepared according to the general procedure **B** using **A4** (4.10 g, 16.6 mmol, 1.0 equiv.). After flash column chromatography (cyclohexane/EtOAc ; 95:5), the expected product was obtained as a pale-yellow solid (2.95 g, 13.9 mmol, 84%).

<sup>1</sup>H NMR (400 MHz, CDCl<sub>3</sub>) δ 7.50 (d, *J* = 2.5 Hz, 1H), 7.34 (dd, *J* = 8.8, 2.6 Hz, 1H), 6.98 (d, *J* = 8.8 Hz, 1H), 4.77 (d, *J* = 2.4 Hz, 2H), 3.29 (s, 1H), 2.52 (t, *J* = 2.4 Hz, 1H), 1.29 (s, 9H).

<sup>13</sup>C NMR (101 MHz, CDCl<sub>3</sub>) δ 156.5, 144.3, 131.4, 127.1, 112.6, 111.4, 81.0, 80.4, 78.6, 76.0, 56.6, 34.2, 31.4 (3C).

M.p. = 58-60 °C

HRMS (ESI): Calculated for C<sub>15</sub>H<sub>16</sub>O [M+H]<sup>+</sup> : 213.1274 (100) found 213.1277 (100).



### 3-ethynyl-4-(prop-2-yn-1-yloxy)-1,1'-biphenyl (1e)

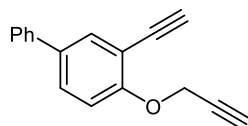

1e

Chemical Formula: C<sub>17</sub>H<sub>12</sub>O

Prepared according to the general procedure **B** using **A5** (2.00 g, 7.51 mmol, 1.0 equiv.). After flash column chromatography (petroleum ether/EtOAc ; 95:5 to 90:10), the expected product was obtained as a white solid (1.32 g, 5.68 mmol, 76%).

<sup>1</sup>H NMR (400 MHz, CDCl<sub>3</sub>) δ 7.74 (d, *J* = 2.4 Hz, 1H), 7.57-7.53 (m, 3H), 7.45-7.41 (m, 2H), 7.36-7.32 (m, 1H), 7.13 (d, *J* = 8.6 Hz, 1H), 4.85 (d, *J* = 2.4 Hz, 2H), 3.35 (s, 1H), 2.56 (t, *J* = 2.4 Hz, 1H).

<sup>13</sup>C NMR (101 MHz, CDCl<sub>3</sub>) δ 158.1, 139.8, 134.8, 133.0, 128.9 (2C), 128.8, 127.3, 126.9 (2C), 113.2, 112.5, 81.7, 79.8, 78.3, 76.3, 56.7.

M.p. = 101-103 °C

HRMS (ESI): Calculated for C<sub>17</sub>H<sub>12</sub>O [M+H]<sup>+</sup> : 233.0961 (100) found 233.0964 (100).

### 2-ethynyl-4-fluoro-1-(prop-2-yn-1-yloxy)benzene (1f)

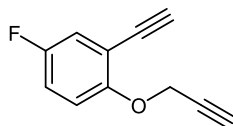

1f

Chemical Formula: C<sub>11</sub>H<sub>7</sub>FO

Prepared according to the general procedure **B** using **A6** (1.50 g, 7.20 mmol, 1.0 equiv.). After flash column chromatography (cyclohexane/EtOAc ; 95:5), the expected product was obtained as a pale-brown solid (859 mg, 4.93 mmol, 68%).

<sup>1</sup>H NMR (400 MHz, CDCl<sub>3</sub>) δ 7.15 (dd, *J* = 8.4, 2.9 Hz, 1H), 7.03-6.95 (m, 2H), 4.74 (d, *J* = 2.4 Hz, 2H), 3.33 (s, 1H), 2.53 (t, *J* = 2.4 Hz, 1H).

<sup>13</sup>C NMR (101 MHz, CDCl<sub>3</sub>) δ 155.7, 154.0 (d, *J* = 237.4 Hz), 120.5 (d, *J* = 24.7 Hz), 116.7 (d, *J* = 23.2 Hz), 114.6 (d, *J* = 8.6 Hz), 113.5 (d, *J* = 9.6 Hz), 82.7, 78.7 (d, *J* = 2.2 Hz), 78.1, 76.3, 57.2.

<sup>19</sup>F NMR (376.5 MHz, CDCl<sub>3</sub>) δ = -122.0.

M.p. = 51-53 °C

HRMS (ESI): Calculated for C<sub>11</sub>H<sub>7</sub>FO [M+H]<sup>+</sup> : 175.0554 (100) found 175.0556 (100).

### 2-ethynyl-4-chloro-1-(prop-2-yn-1-yloxy)benzene (1g)

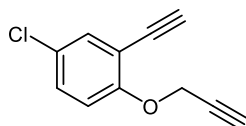

**1g**

Chemical Formula: C<sub>11</sub>H<sub>7</sub>ClO

Prepared according to the general procedure **B** using **A7** (3.15 g, 14.0 mmol, 1.0 equiv.). After flash column chromatography (petroleum ether/DCM ; 80:20), the expected product was obtained as white fluffy needles (2.18 g, 11.4 mmol, 81%).

<sup>1</sup>H NMR (400 MHz, CDCl<sub>3</sub>) δ 7.43 (d, *J* = 2.6 Hz, 1H), 7.27 (dd, *J* = 8.9, 2.6 Hz, 1H), 6.97 (d, *J* = 8.9 Hz, 1H), 4.77 (d, *J* = 2.4 Hz, 2H), 3.33 (s, 1H), 2.53 (t, *J* = 2.4 Hz, 1H).

<sup>13</sup>C NMR (101 MHz, CDCl<sub>3</sub>) δ 157.3, 133.8, 130.0, 126.4, 114.3, 113.8, 82.8, 78.5, 77.9, 76.6, 56.9.

**M.p.** = 80-82 °C

**HRMS (ESI):** Calculated for C<sub>11</sub>H<sub>7</sub>ClO [M+H]<sup>+</sup> : 191.0258 (100), 193.0229 (32) found 191.0260 (100), 193.0230 (32).

### 2-ethynyl-4-bromo-1-(prop-2-yn-1-yloxy)benzene (1h)

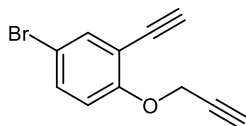

**1h**

Chemical Formula: C<sub>11</sub>H<sub>7</sub>BrO

Prepared according to the general procedure **B** using **A8** (2.15 g, 7.99 mmol, 1.0 equiv.). After flash column chromatography (petroleum ether/DCM ; 90:10 to 85:15), the expected product was obtained as a pale-yellow solid (747 mg, 3.18 mmol, 40%).

<sup>1</sup>H NMR (400 MHz, CDCl<sub>3</sub>) δ 7.58 (d, *J* = 2.5 Hz, 1H), 7.41 (dd, *J* = 8.9, 2.5 Hz, 1H), 6.92 (d, *J* = 8.9 Hz, 1H), 4.77 (d, *J* = 2.4 Hz, 2H), 3.33 (s, 1H), 2.54 (t, *J* = 2.4 Hz, 1H).

<sup>13</sup>C NMR (101 MHz, CDCl<sub>3</sub>) δ 157.8, 136.7, 132.9, 114.6, 114.3, 113.4, 82.9, 78.4, 77.8, 76.6, 56.8.

**M.p.** = 75-77 °C

**HRMS (ESI):** Calculated for C<sub>11</sub>H<sub>7</sub>BrO [M+H]<sup>+</sup> : 234.9753 (100), 236.9733 (97) found 234.9756 (100), 236.9735 (97).

### 3-ethynyl-4-(prop-2-yn-1-yloxy)benzotrile (1i)

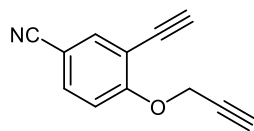

1i

Chemical Formula: C<sub>12</sub>H<sub>7</sub>NO

Prepared according to the general procedure **B** using **A9** (1.91 g, 8.87 mmol, 1.0 equiv.). After flash column chromatography (petroleum ether/EtOAc ; 95:5), the expected product was obtained as white fluffy needles (1.36 g, 7.51 mmol, 85%).

<sup>1</sup>H NMR (400 MHz, CDCl<sub>3</sub>) δ 7.71 (d, *J* = 2.1 Hz, 1H), 7.59 (dd, *J* = 8.7, 2.1 Hz, 1H), 7.10 (d, *J* = 8.7 Hz, 1H), 4.83 (d, *J* = 2.4 Hz, 2H), 3.37 (s, 1H), 2.58 (t, *J* = 2.4 Hz, 1H).

<sup>13</sup>C NMR (101 MHz, CDCl<sub>3</sub>) δ 161.3, 137.7, 133.9, 117.9, 113.4, 112.9, 105.0, 83.6, 77.2, 76.8, 76.7, 56.5.

M.p. = 123-125 °C

HRMS (ESI): Calculated for C<sub>12</sub>H<sub>7</sub>NO [M+H]<sup>+</sup> : 182.0600 (100) found 182.0602 (100).

### 1-ethynyl-4-methoxy-2-(prop-2-yn-1-yloxy)benzene (1j)

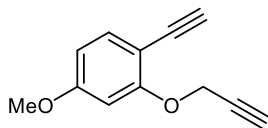

1j

Chemical Formula: C<sub>12</sub>H<sub>10</sub>O<sub>2</sub>

Prepared according to the general procedure **B** using **A10** (2.30 g, 10.4 mmol, 1.0 equiv.). After flash column chromatography (petroleum ether/EtOAc ; 98:2 to 95:5), the expected product was obtained as a yellow oil (1.17 g, 6.28 mmol, 60%).

<sup>1</sup>H NMR (400 MHz, CDCl<sub>3</sub>) δ 7.37 (d, *J* = 8.5 Hz, 1H), 6.59 (d, *J* = 2.4 Hz, 1H), 6.46 (dd, *J* = 8.5, 2.4 Hz, 1H), 4.75 (d, *J* = 2.4 Hz, 2H), 3.78 (s, 3H), 3.22 (s, 1H), 2.54 (t, *J* = 2.4 Hz, 1H).

<sup>13</sup>C NMR (101 MHz, CDCl<sub>3</sub>) δ 161.2, 159.8, 135.0, 106.1, 104.4, 100.3, 80.1, 79.9, 78.1, 76.3, 56.5, 55.5.

M.p. = 88-90 °C

HRMS (ESI): Calculated for C<sub>12</sub>H<sub>10</sub>O<sub>2</sub> [M+H]<sup>+</sup> : 187.0754 (100) found 187.0756 (100).

### 1-ethynyl-2-(prop-2-yn-1-yloxy)naphthalene (**1k**)

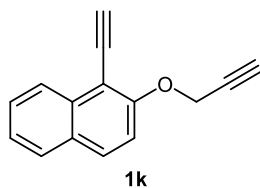

Chemical Formula: C<sub>15</sub>H<sub>10</sub>O

Prepared according to the general procedure **B** using **A11** (828 mg, 3.44 mmol, 1.0 equiv.). After flash column chromatography (petroleum ether/EtOAc ; 99:1), the expected product was obtained as a pale-yellow solid (428 mg, 2.07 mmol, 60%).

**<sup>1</sup>H NMR** (400 MHz, CDCl<sub>3</sub>) δ 8.31 (dd, *J* = 8.5, 0.8 Hz, 1H), 7.84 (d, *J* = 9.1 Hz, 1H), 7.80 (d, *J* = 8.2 Hz, 1H), 7.59-7.55 (m, 1H), 7.44-7.40 (m, 1H), 7.37 (d, *J* = 9.1 Hz, 1H), 4.94 (d, *J* = 2.4 Hz, 2H), 3.77 (s, 1H), 2.55 (t, *J* = 2.4 Hz, 1H).

**<sup>13</sup>C NMR** (101 MHz, CDCl<sub>3</sub>) δ 158.0, 134.8, 130.5, 129.1, 128.2, 127.7, 125.4, 124.9, 114.7, 106.8, 87.1, 78.6, 78.0, 76.3, 57.4.

**M.p.** = 70-72 °C

**HRMS (ESI):** Calculated for C<sub>15</sub>H<sub>10</sub>O [M+H]<sup>+</sup> : 207.0804 (100) found 207.0808 (100).

### 5-ethynyl-6-(prop-2-yn-1-yloxy)benzo[d][1,3]dioxole (**1l**)

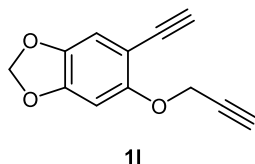

Chemical Formula: C<sub>12</sub>H<sub>8</sub>O<sub>3</sub>

In a 50 mL round bottom flask **A12** (710 mg, 2.04 mmol, 1.0 equiv.), was dissolved in 10 mL of methanol and K<sub>2</sub>CO<sub>3</sub> (844 mg, 6.11 mmol, 3.0 equiv.) was added, the mixture turns to brown. The suspension was stirred 6 h at room temperature, then filtrated. The resulting solution was concentrated under reduced pressure. The residue was dissolved in 13 mL of anhydrous DMF and stirred 5 minutes with K<sub>2</sub>CO<sub>3</sub> (564 mg, 4.08 mmol, 2.0 equiv.). Under argon, propargyl bromide (80 mol% in toluene) (328 μL, 3.06 mmol, 1.5 equiv.) was added and the solution was stirred overnight at room temperature, then water (20 mL) was added. The resulting solution was extracted with DCM (3 x 20 mL). The combined organic layers were dried over MgSO<sub>4</sub>, filtered, and the filtrate was concentrated under reduced pressure. The residue was purified by flash column chromatography (SiO<sub>2</sub>, petroleum ether/EtOAc ; 98:2 to 95:5) affording **1l** as an orange solid (310 mg, 1.55 mmol, 76%).

**<sup>1</sup>H NMR** (400 MHz, CDCl<sub>3</sub>) δ 6.86 (s, 1H), 6.65 (s, 1H), 5.94 (s, 2H), 4.71 (d, *J* = 2.4 Hz, 2H), 3.22 (s, 1H), 2.53 (t, *J* = 2.4 Hz, 1H).

**<sup>13</sup>C NMR** (101 MHz, CDCl<sub>3</sub>) δ 155.3, 149.0, 142.0, 112.4, 104.4, 101.9, 97.6, 80.4, 79.9, 78.4, 76.3, 57.8.

**M.p.** = 117-119 °C

**HRMS (ESI):** Calculated for C<sub>12</sub>H<sub>8</sub>O<sub>3</sub> [M+H]<sup>+</sup> : 201.0546 (100) found 201.0545 (100).

**1-ethynyl-3,5-dimethyl-2-(prop-2-yn-1-yloxy)benzene (1m)**

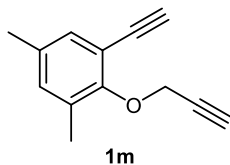

Chemical Formula: C<sub>13</sub>H<sub>12</sub>O

Prepared according to the general procedure **B** using **A13** (2.50 g, 11.4 mmol, 1.0 equiv.). After flash column chromatography (petroleum ether/EtOAc ; 98:2), the expected product was obtained as pale-yellow solid (1.48 g, 8.03 mmol, 70%).

**<sup>1</sup>H NMR** (400 MHz, CDCl<sub>3</sub>) δ 7.12 (s, 1H), 6.99 (s, 1H), 4.82 (d, *J* = 2.4 Hz, 2H), 3.30 (s, 1H), 2.48 (t, *J* = 2.4 Hz, 1H), 2.31 (s, 3H), 2.25 (s, 3H).

**<sup>13</sup>C NMR** (101 MHz, CDCl<sub>3</sub>) δ 155.8, 133.5, 132.8, 132.1, 131.8, 115.3, 81.7, 80.2, 79.4, 75.1, 60.3, 20.4, 16.5.

**M.p.** = 106-108 °C

**HRMS (ESI):** Calculated for C<sub>13</sub>H<sub>12</sub>O [M+H]<sup>+</sup> : 185.0961 (100) found 185.0963 (100).

**2-bromo-5-ethynyl-1,3-dimethyl-4-(prop-2-yn-1-yloxy)benzene (1n)**

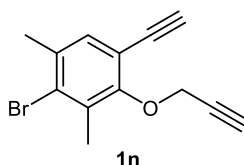

Chemical Formula: C<sub>13</sub>H<sub>11</sub>BrO

Prepared according to the general procedure **B** using **A14** (800 mg, 2.69 mmol, 1.0 equiv.). After flash column chromatography (petroleum ether/EtOAc ; 98:2 to 95:5), the expected product was obtained as pale-yellow solid (471 mg, 1.79 mmol, 66%).

**<sup>1</sup>H NMR** (400 MHz, CDCl<sub>3</sub>) δ 6.81 (s, 1H), 4.76 (d, *J* = 2.4 Hz, 2H), 3.52 (s, 1H), 2.58 (s, 3H), 2.53 (t, *J* = 2.4 Hz, 1H), 2.44 (s, 3H).

**<sup>13</sup>C NMR** (101 MHz, CDCl<sub>3</sub>) δ 157.7, 142.5, 139.9, 119.7, 112.6, 111.3, 85.8, 78.5, 78.2, 76.3, 56.7, 25.0, 22.4.

**M.p.** = 109-111 °C

**HRMS (ESI):** Calculated for C<sub>13</sub>H<sub>11</sub>BrO [M+H]<sup>+</sup> : 263.0066 (100), 265.0046 (97) found 263.0068 (100), 265.0048 (97).

### 1-(but-2-yn-1-yloxy)-2-ethynylbenzene (**1o**)

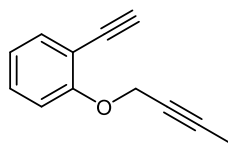

**1o**

Chemical Formula: C<sub>12</sub>H<sub>10</sub>O

Prepared according to a modification of the general procedure **B** using **A1** (2.00 g, 10.5 mmol, 1.00 equiv.) and 1-bromo-2-butyne (1.38 mL, 15.8 mmol, 1.50 equiv.). After flash column chromatography (petroleum ether/EtOAc ; 98:2 to 95:5), the expected product was obtained as yellow oil (1.42 g, 8.34 mmol, 79%).

<sup>1</sup>H NMR (400 MHz, CDCl<sub>3</sub>) δ 7.45 (dd, *J* = 7.6, 1.7 Hz, 1H), 7.32-7.28 (m, 1H), 7.02 (d, *J* = 8.4 Hz, 1H), 6.92 (app. t, *J* = 7.5 Hz, 1H), 4.74 (q, *J* = 2.2 Hz, 2H), 3.30 (s, 1H), 1.82 (t, *J* = 2.4 Hz, 3H).

<sup>13</sup>C NMR (101 MHz, CDCl<sub>3</sub>) δ 158.9, 134.2, 130.0, 121.0, 112.6, 111.8, 84.2, 81.4, 79.9, 73.8, 57.0, 3.7.

HRMS (ESI): Calculated for C<sub>12</sub>H<sub>10</sub>O [M+H]<sup>+</sup> : 171.0804 (100) found 171.0806 (100).

### (3-(2-ethynylphenoxy)prop-1-yn-1-yl)trimethylsilane (**1p**)

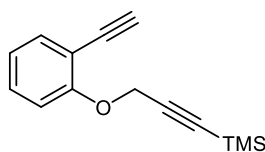

**1p**

Chemical Formula: C<sub>14</sub>H<sub>16</sub>OSi

In a 100 mL round bottom flask 2-((trimethylsilyl)ethynyl)phenol (1.00 g, 5.25 mmol, 1.0 equiv.), was dissolved in 13 mL of THF and tetrabutylammonium fluoride monohydrate (1.81 g, 6.31 mmol, 1.2 equiv.) was added, the solution turns to black. The solution was stirred 1 h at room temperature, then water (20 mL) was added. The resulting solution was extracted with Et<sub>2</sub>O (3 x 20 mL). The combined organic layers were dried over MgSO<sub>4</sub>, filtered and the filtrate was concentrated under reduced pressure. The residue was dissolved in 13 mL of anhydrous DMF and stirred 5 minutes with K<sub>2</sub>CO<sub>3</sub> (1.50 g, 10.5 mmol, 2.0 equiv.). Under argon, 3-(trimethylsilyl)propargyl bromide (1.12 mL, 7.88 mmol, 1.5 equiv.) was added and the solution was stirred 2 h at room temperature. Water (20 mL) was added, and the resulting solution was extracted with DCM (3 x 20 mL). The combined organic layers were dried over MgSO<sub>4</sub>, filtered, and the filtrate was concentrated under reduced pressure. The residue was purified by flash column chromatography (SiO<sub>2</sub>, petroleum ether/DCM ; 95:5 to 90:10) affording **1p** as a yellow oil (830 mg, 3.63 mmol, 69%).

$^1\text{H NMR}$  (400 MHz,  $\text{CDCl}_3$ )  $\delta$  7.46 (dd,  $J = 7.6, 1.7$  Hz, 1H), 7.33-7.28 (m, 1H), 7.06 (dd,  $J = 8.3, 0.5$  Hz, 1H), 6.94 (td,  $J = 7.6, 0.9$  Hz, 1H), 4.78 (s, 2H), 3.30 (s, 1H), 0.16 (s, 9H).

$^{13}\text{C NMR}$  (101 MHz,  $\text{CDCl}_3$ )  $\delta$  158.9, 134.3, 130.0, 121.4, 113.3, 112.1, 99.9, 93.4, 81.5, 79.9, 57.5, 0.3 (3C).

**HRMS (ESI):** Calculated for  $\text{C}_{14}\text{H}_{16}\text{OSi}$   $[\text{M}+\text{H}]^+$  : 229.1043 (100) found 229.1046 (100).

### Trimethyl((2-(prop-2-yn-1-yloxy)phenyl)ethynyl)silane (**1q**)

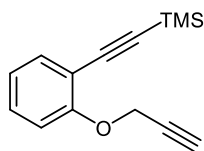

**1q**

Chemical Formula:  $\text{C}_{14}\text{H}_{16}\text{OSi}$

Prepared according to a modification the general procedure **B** using **A1** (700 mg, 3.68 mmol, 1.0 equiv.), without the deprotection step. After flash column chromatography (petroleum ether/EtOAc ; 98:2), the expected product was obtained as white crystal (577 mg, 2.53 mmol, 69%).

$^1\text{H NMR}$  (400 MHz,  $\text{CDCl}_3$ )  $\delta$  7.45 (dd,  $J = 7.6, 1.7$  Hz, 1H), 7.30-7.26 (m, 1H), 7.00 (dd,  $J = 8.3, 0.7$  Hz, 1H), 6.93 (dt,  $J = 7.5, 1.0$  Hz, 1H), 4.76 (d,  $J = 2.4$  Hz, 2H), 2.54 (t,  $J = 2.4$  Hz, 1H), 0.28 (s, 9H).

$^{13}\text{C NMR}$  (101 MHz,  $\text{CDCl}_3$ )  $\delta$  158.5, 134.2, 129.8, 121.5, 113.4 (2C), 101.0, 99.0, 78.5, 76.0, 56.7, 0.1 (3C).

**M.p.** = 48-50 °C

**HRMS (ESI):** Calculated for  $\text{C}_{14}\text{H}_{16}\text{OSi}$   $[\text{M}+\text{H}]^+$  : 229.1043 (100) found 229.1045 (100).

### 1-(phenylethynyl)-2-(prop-2-yn-1-yloxy)benzene (**1r**)

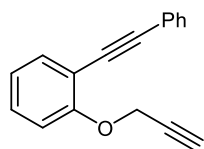

**1r**

Chemical Formula:  $\text{C}_{17}\text{H}_{12}\text{O}$

Prepared according to a modification the general procedure **B** using **A15** (750 mg, 3.86 mmol, 1.0 equiv.), without the deprotection step. After flash column chromatography (petroleum ether/EtOAc ; 98:2 to 95:5), the expected product was obtained as a yellow oil (801 mg, 3.45 mmol, 89%).

$^1\text{H NMR}$  (400 MHz,  $\text{CDCl}_3$ )  $\delta$  7.61-7.58 (m, 2H), 7.56 (dd,  $J = 7.6, 1.6$  Hz, 1H), 7.39-7.31 (m, 4H), 7.08 (dd,  $J = 8.2, 0.4$  Hz, 1H), 7.02 (dt,  $J = 7.5, 0.9$  Hz, 1H), 4.83 (d,  $J = 2.4$  Hz, 2H), 2.56 (t,  $J = 2.4$  Hz, 1H).

$^{13}\text{C NMR}$  (101 MHz,  $\text{CDCl}_3$ )  $\delta$  158.1, 133.7, 131.7 (2C), 129.6, 128.4 (2C), 128.3, 123.6, 121.7, 113.5, 113.3, 93.9, 85.6, 78.5, 76.0, 56.7.

**HRMS (ESI):** Calculated for  $\text{C}_{17}\text{H}_{12}\text{O}$   $[\text{M}+\text{H}]^+$  : 233.0961 (100) found 233.0966 (100).

### 1-(but-2-yn-1-yloxy)-2-(phenylethynyl)benzene (**1s**)

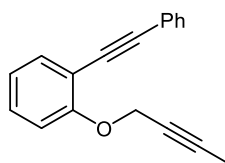

**1s**  
Chemical Formula:  $\text{C}_{18}\text{H}_{14}\text{O}$

Prepared according to a modification of the general procedure **B** using **A15** (750 mg, 3.86 mmol, 1.0 equiv.) and 1-bromo-2-butyne (507  $\mu\text{L}$ , 5.79 mmol, 1.5 equiv.), without the deprotection step. After flash column chromatography (petroleum ether/EtOAc ; 98:2 to 95:5), the expected product was obtained as white solid (850 mg, 3.45 mmol, 89%).

$^1\text{H NMR}$  (400 MHz,  $\text{CDCl}_3$ )  $\delta$  7.60-7.57 (m, 2H), 7.52 (dd,  $J = 7.6, 1.7$  Hz, 1H), 7.38-7.30 (m, 4H), 7.08 (dd,  $J = 8.4, 0.7$  Hz, 1H), 6.99 (dt,  $J = 7.5, 1.0$  Hz, 1H), 4.79 (q,  $J = 2.3$  Hz, 2H), 1.87 (t,  $J = 2.4$  Hz, 3H).

$^{13}\text{C NMR}$  (101 MHz,  $\text{CDCl}_3$ )  $\delta$  158.3, 133.6, 131.7 (2C), 129.5, 128.3 (2C), 128.1, 123.7, 121.2, 113.3, 113.1, 93.6, 85.7, 84.1, 74.1, 57.2, 3.8.

**M.p.** = 68-70  $^\circ\text{C}$

**HRMS (ESI):** Calculated for  $\text{C}_{18}\text{H}_{14}\text{O}$   $[\text{M}+\text{H}]^+$  : 247.1117 (100) found 247.1120 (100).



### 3. Characterization of 5H-chromeno[3,4-c]pyridines derivatives

***N,N*-dimethyl-5H-chromeno[3,4-*c*]pyridin-2-amine (3aa) and *N,N*-dimethyl-5H-chromeno[4,3-*c*]pyridin-3-amine (3aa')**

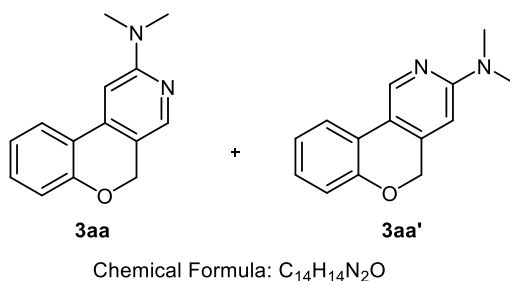

Prepared according to the general procedure **C** using **1a** (100 mg, 640  $\mu$ mol, 1.0 equiv.) and dimethylcyanamide **2a** (76  $\mu$ L, 960  $\mu$ mol, 1.5 equiv.). After flash column chromatography (petroleum ether/EtOAc ; 80:20), the expected product was obtained as a pale-brown oil (121 mg, 535  $\mu$ mol, 84%). Regioisomeric ratio (**3aa/3aa'**) : (96:4).

**<sup>1</sup>H NMR (3aa)** (400 MHz, CDCl<sub>3</sub>)  $\delta$  8.00 (s, 1H), 7.75 (dd, *J* = 7.8, 1.5 Hz, 1H), 7.33-7.28 (m, 1H), 7.06 (dt, *J* = 7.6, 1.1 Hz, 1H), 7.00 (dd, *J* = 8.2, 1.0 Hz, 1H), 6.75 (s, 1H), 5.04 (s, 2H), 3.15 (s, 6H).

**<sup>13</sup>C NMR (3aa)** (101 MHz, CDCl<sub>3</sub>)  $\delta$  159.6, 155.6, 143.3, 138.2, 130.6, 123.5, 121.6, 121.3, 117.5, 114.3, 97.2, 65.8, 38.0 (2C).

**<sup>1</sup>H NMR (3aa')** (400 MHz, CDCl<sub>3</sub>)  $\delta$  8.54 (s, 1H), 7.67 (dd, *J* = 7.7, 1.6 Hz, 1H), 7.17-7.13 (m, 1H), 7.03 (dt, *J* = 7.6, 1.2 Hz, 1H), 6.95 (dd, *J* = 8.0, 1.1 Hz, 1H), 6.27 (s, 1H), 5.02 (s, 2H), 3.13 (s, 6H).

**HRMS (ESI):** Calculated for C<sub>14</sub>H<sub>14</sub>N<sub>2</sub>O [M+H]<sup>+</sup> : 191.0258 (100) found 191.0260 (100).

***N,N*-9-trimethyl-5H-chromeno[3,4-*c*]pyridin-2-amine (3ba) and *N,N*-9-trimethyl-5H-chromeno[4,3-*c*]pyridin-3-amine (3ba')**

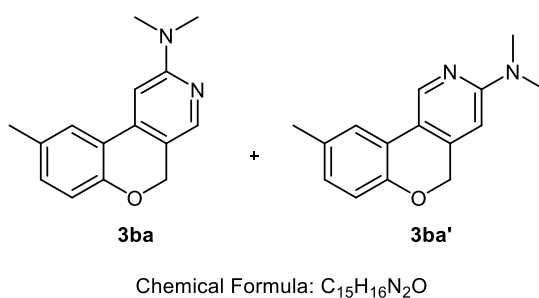

Prepared according to the general procedure **C** using **1b** (100 mg, 587  $\mu$ mol, 1.0 equiv.) and dimethylcyanamide **2a** (69  $\mu$ L, 881  $\mu$ mol, 1.5 equiv.). After flash column chromatography (petroleum ether/EtOAc : 90:10 to 80:20), the expected product was obtained as a yellow solid (123 mg, 512  $\mu$ mol, 87%). Regioisomeric ratio (**3ba/3ba'**) : (96:4).

**<sup>1</sup>H NMR (3ba)** (400 MHz, CDCl<sub>3</sub>)  $\delta$  7.99 (s, 1H), 7.53 (d,  $J$  = 1.4 Hz, 1H), 7.11 (dd,  $J$  = 8.2, 1.9 Hz, 1H), 6.90 (d,  $J$  = 8.2 Hz, 1H), 6.74 (s, 1H), 5.00 (s, 2H), 3.16 (s, 6H), 2.37 (s, 3H).

**<sup>13</sup>C NMR (3ba)** (101 MHz, CDCl<sub>3</sub>)  $\delta$  160.1, 153.9, 143.6, 139.0, 131.9, 131.4, 124.1, 121.4, 117.7, 115.0, 97.7, 66.3, 38.6 (2C), 21.0.

**M.p.** = 117-119 °C

**HRMS (ESI):** Calculated for C<sub>15</sub>H<sub>16</sub>N<sub>2</sub>O [M+H]<sup>+</sup> : 241.1335 (100) found 241.1338 (100).

**9-isopropyl-*N,N*-dimethyl-5H-chromeno[3,4-*c*]pyridin-2-amine (3ca) and 9-isopropyl-*N,N*-dimethyl-5H-chromeno[4,3-*c*]pyridin-3-amine (3ca')**

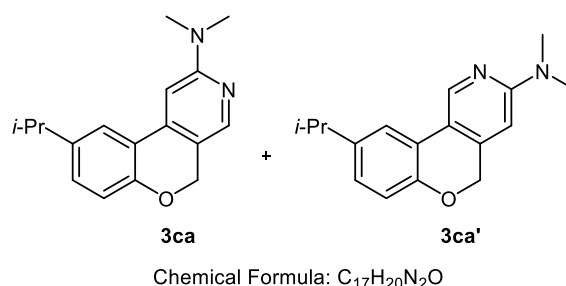

Prepared according to the general procedure **C** using **1c** (100 mg, 504  $\mu$ mol, 1.0 equiv.) and dimethylcyanamide **2a** (61  $\mu$ L, 757  $\mu$ mol, 1.5 equiv.). After flash column chromatography (cyclohexane/EtOAc ; 90:10 to 80:20), the expected product was obtained as a yellow oil (110 mg, 410  $\mu$ mol, 81%). Regioisomeric ratio (**3ca/3ca'**) : (95:5).

**<sup>1</sup>H NMR (3ca)** (400 MHz, CDCl<sub>3</sub>)  $\delta$  7.98 (d,  $J$  = 0.7 Hz, 1H), 7.56 (d,  $J$  = 2.2 Hz, 1H), 7.18 (dd,  $J$  = 8.4, 2.1 Hz, 1H), 6.94 (d,  $J$  = 8.4 Hz, 1H), 6.74 (s, 1H), 5.00 (s, 2H), 3.15 (s, 6H), 2.94 (sept.,  $J$  = 6.9 Hz, 1H), 1.30 (app. s, 3H), 1.28 (app. s, 3H).

**<sup>13</sup>C NMR (3ca)** (101 MHz, CDCl<sub>3</sub>)  $\delta$  160.1, 154.1, 143.7, 142.5, 139.0, 129.0, 121.6, 121.3, 117.7, 115.0, 97.6, 66.3, 38.5 (2C), 33.8, 24.3 (2C).

**HRMS (ESI):** Calculated for C<sub>17</sub>H<sub>20</sub>N<sub>2</sub>O [M+H]<sup>+</sup> : 269.1648 (100) found 269.1651 (100).

**9-(*tert*-butyl)-*N,N*-dimethyl-5*H*-chromeno[3,4-*c*]pyridin-2-amine (3da) and 9-(*tert*-butyl)-*N,N*-dimethyl-5*H*-chromeno[4,3-*c*]pyridin-3-amine (3da')**

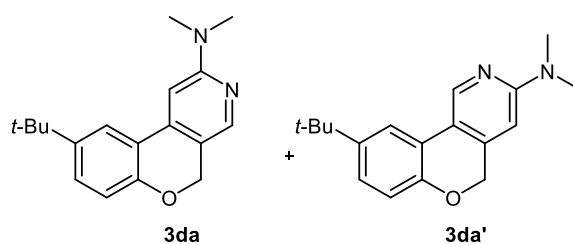

Chemical Formula: C<sub>18</sub>H<sub>22</sub>N<sub>2</sub>O

Prepared according to the general procedure **C** using **1d** (100 mg, 471 μmol, 1.0 equiv.) and dimethylcyanamide **2a** (56 μL, 707 μmol, 1.5 equiv.). After flash column chromatography (petroleum ether/EtOAc ; 90:10), the expected product was obtained as a yellow solid (118 mg, 418 μmol, 89%) ; NMR yield using mesitylene as an internal standard : 93%. Regioisomeric ratio (**3da/3da'**) : (96:4).

<sup>1</sup>H NMR (**3da**) (400 MHz, CDCl<sub>3</sub>) δ 7.99 (d, *J* = 0.6 Hz, 1H), 7.72 (d, *J* = 2.4 Hz, 1H), 7.35 (dd, *J* = 8.6, 2.4 Hz, 1H), 6.95 (d, *J* = 8.6 Hz, 1H), 6.75 (s, 1H), 5.01 (s, 2H), 3.16 (s, 6H), 1.38 (s, 9H).

<sup>13</sup>C NMR (**3da**) (101 MHz, CDCl<sub>3</sub>) δ 160.1, 153.8, 144.7, 143.7, 139.1, 128.4, 120.9, 120.1, 117.4, 115.0, 97.5, 66.3, 38.5 (2C), 34.5, 31.6 (3C).

M.p. = 135-137 °C

HRMS (ESI): Calculated for C<sub>18</sub>H<sub>22</sub>N<sub>2</sub>O [M+H]<sup>+</sup> : 283.1805 (100) found 283.1807 (100).

***N,N*-dimethyl-9-phenyl-5*H*-chromeno[3,4-*c*]pyridin-2-amine (3ea) and *N,N*-dimethyl-9-phenyl-5*H*-chromeno[4,3-*c*]pyridin-3-amine (3ea')**

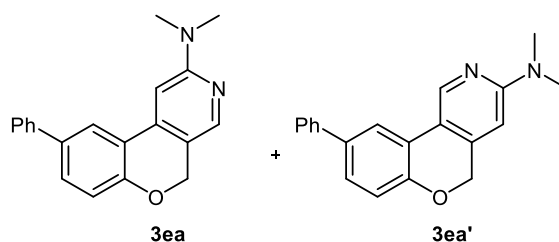

Chemical Formula: C<sub>20</sub>H<sub>18</sub>N<sub>2</sub>O

Prepared according to the general procedure **D** using **1e** (100 mg, 430 μmol, 1.0 equiv.) and dimethylcyanamide **2a** (51 μL, 646 μmol, 1.5 equiv.). After flash column chromatography (petroleum ether/EtOAc ; 85:15), the expected product was obtained as a pale-yellow solid (114 mg, 377 μmol, 88%). Regioisomeric ratio (**3ea/3ea'**) : (94:6).

**<sup>1</sup>H NMR (3ea)** (400 MHz, CDCl<sub>3</sub>) δ 8.03 (d, *J* = 0.6 Hz, 1H), 7.92 (d, *J* = 2.2 Hz, 1H), 7.63-7.60 (m, 2H), 7.52 (dd, *J* = 8.4, 2.2 Hz, 1H), 7.49-7.45 (m, 2H), 7.39-7.35 (m, 1H), 7.08 (d, *J* = 8.4 Hz, 1H), 6.79 (s, 1H), 5.07 (s, 2H), 3.16 (s, 6H).

**<sup>13</sup>C NMR (3ea)** (101 MHz, CDCl<sub>3</sub>) δ 160.1, 155.5, 143.8, 140.8, 138.6, 135.4, 129.9, 128.9 (2C), 127.2, 127.0 (2C), 122.5, 121.9, 118.3, 114.7, 97.6, 66.4, 38.5 (2C).

**M.p.** = 145-147 °C

**HRMS (ESI):** Calculated for C<sub>20</sub>H<sub>18</sub>N<sub>2</sub>O [M+H]<sup>+</sup> : 303.1492 (100) found 303.1494 (100).

**9-fluoro-*N,N*-dimethyl-5*H*-chromeno[3,4-*c*]pyridin-2-amine (3fa) and 9-fluoro-*N,N*-dimethyl-5*H*-chromeno[4,3-*c*]pyridin-3-amine (3fa')**

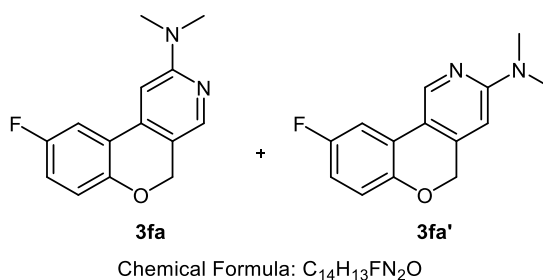

Prepared according to the general procedure **C** using **1f** (100 mg, 574 μmol, 1.0 equiv.) and dimethylcyanamide **2a** (70 μL, 861 μmol, 1.5 equiv.). After flash column chromatography (petroleum ether/EtOAc ; 90:10 to 80:20), the expected product was obtained as a yellow solid (107 mg, 438 μmol, 76%). Regioisomeric ratio (**3fa/3fa'**) : (91:9).

**<sup>1</sup>H NMR (3fa)** (400 MHz, CDCl<sub>3</sub>) δ 7.98 (d, *J* = 0.6 Hz, 1H), 7.38 (dd, *J* = 9.0, 2.9 Hz, 1H), 7.00-6.91 (m, 2H), 6.61 (s, 1H), 4.98 (s, 2H), 3.12 (s, 6H).

**<sup>13</sup>C NMR (3fa)** (101 MHz, CDCl<sub>3</sub>) δ 160.0, 158.0 (d, *J* = 240.4 Hz), 152.0, 143.9, 138.0, 122.8 (d, *J* = 8.1 Hz), 119.0 (d, *J* = 7.1 Hz), 117.6 (d, *J* = 23.2 Hz), 114.5, 109.9 (d, *J* = 24.2 Hz), 97.7, 66.3, 38.4 (2C).

**<sup>19</sup>F NMR (376.5 MHz, CDCl<sub>3</sub>)** δ = -121.0.

**M.p.** = 105-107 °C

**HRMS (ESI):** Calculated for C<sub>14</sub>H<sub>13</sub>FN<sub>2</sub>O [M+H]<sup>+</sup> : 245.1085 (100) found 245.1090 (100).

**9-chloro-*N,N*-dimethyl-5*H*-chromeno[3,4-*c*]pyridin-2-amine (3ga) and 9-chloro-*N,N*-dimethyl-5*H*-chromeno[4,3-*c*]pyridin-3-amine (3ga')**

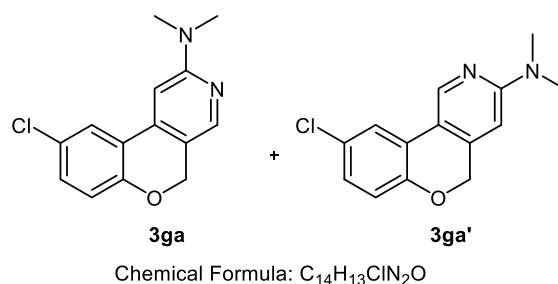

Prepared according to the general procedure **C** using **1g** (100 mg, 525 μmol, 1.0 equiv.) and dimethylcyanamide **2a** (62 μL, 787 μmol, 1.5 equiv.). After flash column chromatography (petroleum ether/EtOAc ; 85:15), the expected product was obtained as a pale-yellow solid (95 mg, 364 μmol, 69%). Regioisomeric ratio (**3ga/3ga'**) : (91:9).

**<sup>1</sup>H NMR (3ga)** (400 MHz, CDCl<sub>3</sub>) δ 7.96 (d, *J* = 0.6 Hz, 1H), 7.63 (d, *J* = 2.5 Hz, 1H), 7.19 (dd, *J* = 8.7, 2.5 Hz, 1H), 6.89 (d, *J* = 8.7 Hz, 1H), 6.60 (s, 1H), 4.98 (s, 2H), 3.11 (s, 6H).

**<sup>13</sup>C NMR (3ga)** (101 MHz, CDCl<sub>3</sub>) δ 159.9, 154.5, 143.9, 137.5, 130.6, 127.0, 123.6, 123.0, 119.3, 114.1, 97.5, 66.3, 38.4 (2C).

**M.p.** = 151-153 °C

**HRMS (ESI):** Calculated for C<sub>14</sub>H<sub>13</sub>ClN<sub>2</sub>O [M+H]<sup>+</sup> : 261.0789 (100), 263.0760 (32) found 261.0792 (100), 263.0764 (32).

**9-bromo-*N,N*-dimethyl-5*H*-chromeno[3,4-*c*]pyridin-2-amine (3ha) and 9-bromo-*N,N*-dimethyl-5*H*-chromeno[4,3-*c*]pyridin-3-amine (3ha')**

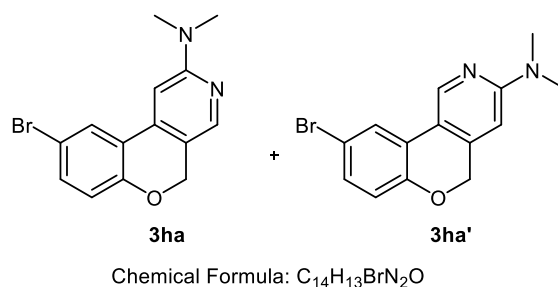

Prepared according to the general procedure **C** using **1h** (100 mg, 425 μmol, 1.0 equiv.) and dimethylcyanamide **2a** (50 μL, 638 μmol, 1.5 equiv.). After flash column chromatography (petroleum ether/EtOAc ; 85:15), the expected product was obtained as a pale-yellow solid (101 mg, 331 μmol, 78%). Regioisomeric ratio (**3ha/3ha'**) : (94:6).

**<sup>1</sup>H NMR (3ha)** (400 MHz, CDCl<sub>3</sub>) δ 7.96 (d, *J* = 0.5 Hz, 1H), 7.78 (d, *J* = 2.4 Hz, 1H), 7.34 (dd, *J* = 8.7, 2.4 Hz, 1H), 6.85 (d, *J* = 8.7 Hz, 1H), 6.61 (s, 1H), 4.99 (s, 2H), 3.12 (s, 6H).



**8-methoxy-*N,N*-dimethyl-5*H*-chromeno[3,4-*c*]pyridin-2-amine (3ja) and 8-methoxy-*N,N*-dimethyl-5*H*-chromeno[4,3-*c*]pyridin-3-amine (3ja')**

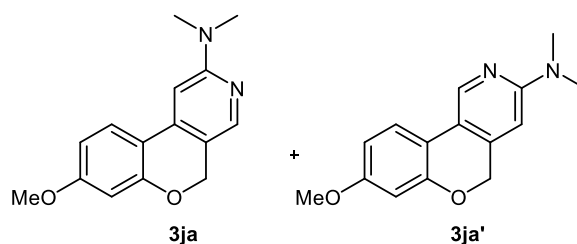

Chemical Formula: C<sub>15</sub>H<sub>16</sub>N<sub>2</sub>O<sub>2</sub>

Prepared according to the general procedure **C** using **1j** (100 mg, 537 μmol, 1.0 equiv.) and dimethylcyanamide **2a** (65 μL, 805 μmol, 1.5 equiv.). After flash column chromatography (petroleum ether/EtOAc ; 90:10 to 70:30), the expected product was obtained as a yellow solid (79 mg, 308 μmol, 57%). Regioisomeric ratio (**3ja/3ja'**) : (97:3).

**<sup>1</sup>H NMR (3ja)** (400 MHz, CDCl<sub>3</sub>) δ 7.93 (s, 1H), 7.61 (d, *J* = 8.6 Hz, 1H), 6.61-6.58 (m, 2H), 6.51 (d, *J* = 2.5 Hz, 1H), 5.00 (s, 2H), 3.78 (s, 3H), 3.10 (s, 6H).

**<sup>13</sup>C NMR (3ja)** (101 MHz, CDCl<sub>3</sub>) δ 162.1, 160.0, 157.3, 143.4, 138.8, 124.8, 114.5, 113.8, 109.1, 102.3, 96.8, 66.5, 55.4, 38.4 (2C).

**M.p.** = 133-135 °C

**HRMS (ESI):** Calculated for C<sub>15</sub>H<sub>16</sub>N<sub>2</sub>O<sub>2</sub> [M+H]<sup>+</sup> : 257.1285 (100) found 257.1288 (100).

***N,N*-dimethyl-5*H*-benzo[5,6]chromeno[3,4-*c*]pyridin-2-amine (3ka) and *N,N*-dimethyl-5*H*-benzo[5,6]chromeno[4,3-*c*]pyridin-3-amine (3ka')**

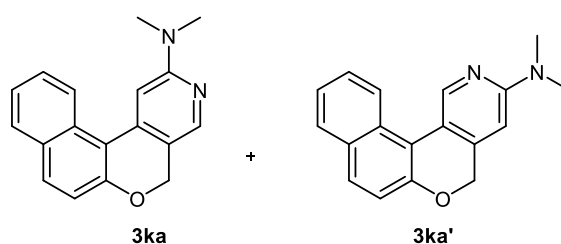

Chemical Formula: C<sub>18</sub>H<sub>16</sub>N<sub>2</sub>O

Prepared according to the general procedure **D** using **1k** (100 mg, 485 μmol, 1.0 equiv.) and dimethylcyanamide **2a** (57 μL, 727 μmol, 1.5 equiv.). After flash column chromatography (petroleum ether/DCM/EtOAc ; 70:20:10), the expected product was obtained as a yellow solid (90 mg, 326 μmol, 67%). Regioisomeric ratio (**3ka/3ka'**) : (89:11).

**<sup>1</sup>H NMR (3ka)** (400 MHz, CDCl<sub>3</sub>) δ 8.59 (d, *J* = 8.5 Hz, 1H), 8.14 (d, *J* = 0.4 Hz, 1H), 7.85 (dd, *J* = 8.0, 0.4 Hz, 1H), 7.77 (d, *J* = 8.8 Hz, 1H), 7.59-7.54 (m, 1H), 7.45-7.41 (m, 1H), 7.22 (d, *J* = 8.8 Hz, 1H), 7.12 (s, 1H), 4.98 (s, 2H), 3.15 (s, 6H).

<sup>13</sup>C NMR (**3ka**) (101 MHz, CDCl<sub>3</sub>) δ 159.9, 155.8, 144.0, 138.6, 131.6, 130.7, 130.6, 129.2, 127.3, 124.4, 124.1, 118.7, 116.4, 116.2, 102.4, 66.9, 38.5 (2C).

<sup>1</sup>H NMR (**3ka'**) (400 MHz, CDCl<sub>3</sub>) δ 8.86 (s, 1H), 8.51 (d, *J* = 8.5 Hz, 1H), 7.83 (d, *J* = 7.6 Hz, 1H), 7.66 (d, *J* = 8.8 Hz, 1H), 7.52-7.48 (m, 1H), 7.42-7.38 (m, 1H), 7.21 (d, *J* = 8.8 Hz, 1H), 6.44 (d, *J* = 0.6 Hz, 1H), 4.96 (s, 2H), 3.18 (s, 6H).

<sup>13</sup>C NMR (**3ka'**) (101 MHz, CDCl<sub>3</sub>) δ 158.2, 152.8, 145.6, 143.5, 130.9, 129.9, 128.9, 128.4, 126.8, 125.0, 124.1, 118.2, 116.5, 115.1, 101.5, 68.8, 38.3 (2C).

M.p. = 134-136 °C

HRMS (ESI): Calculated for C<sub>18</sub>H<sub>16</sub>N<sub>2</sub>O [M+H]<sup>+</sup> : 277.1335 (100) found 277.1338 (100).

*N,N*-dimethyl-5*H*-[1,3]dioxolo[4',5':6,7]chromeno[3,4-*c*]pyridin-2-amine (**3la**) and *N,N*-dimethyl-5*H*-[1,3]dioxolo[4',5':6,7]chromeno[4,3-*c*]pyridin-3-amine (**3la'**)

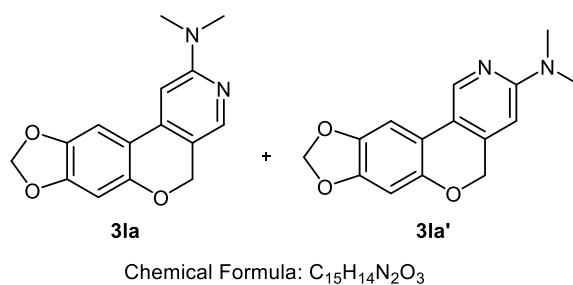

Prepared according to the general procedure **C** using **1l** (100 mg, 499 μmol, 1.0 equiv.) and dimethylcyanamide **2a** (61 μL, 749 μmol, 1.5 equiv.). After flash column chromatography (petroleum ether/EtOAc ; 90:10 to 60:40), the expected product was obtained as a yellow solid (100 mg, 370 μmol, 74%). Regioisomeric ratio (**3la/3la'**) : (98:2).

<sup>1</sup>H NMR (**3la**) (400 MHz, CDCl<sub>3</sub>) δ 7.94 (s, 1H), 7.13 (s, 1H), 6.52 (s, 1H), 6.52 (s, 1H), 5.95 (s, 2H), 4.95 (s, 2H), 3.11 (s, 6H).

<sup>13</sup>C NMR (**3la**) (101 MHz, CDCl<sub>3</sub>) δ 160.1, 152.1, 149.8, 143.4, 143.1, 139.1, 114.4, 113.9, 102.6, 101.6, 99.6, 96.9, 66.6, 38.5 (2C).

M.p. = 166-168 °C

HRMS (ESI): Calculated for C<sub>15</sub>H<sub>14</sub>N<sub>2</sub>O<sub>3</sub> [M+H]<sup>+</sup> : 271.1077 (100) found 271.1078 (100).



***N,N,7,9*-tetramethyl-5*H*-chromeno[3,4-*c*]pyridin-2-amine (3ma) and *N,N,7,9*-tetramethyl-5*H*-chromeno[4,3-*c*]pyridin-3-amine (3ma')**

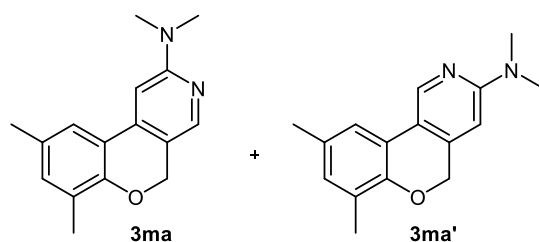

Chemical Formula: C<sub>16</sub>H<sub>18</sub>N<sub>2</sub>O

Prepared according to the general procedure **C** using **1m** (100 mg, 543 μmol, 1.0 equiv.) and dimethylcyanamide **2a** (64 μL, 814 μmol, 1.5 equiv.). After flash column chromatography (petroleum ether/EtOAc ; 90:10), the expected product was obtained as a yellow solid (113 mg, 444 μmol, 82%). Regioisomeric ratio (**3ma/3ma'**) : (96:4).

**<sup>1</sup>H NMR (3ma)** (400 MHz, CDCl<sub>3</sub>) δ 7.99 (d, *J* = 0.5 Hz, 1H), 7.37 (d, *J* = 1.2 Hz, 1H), 6.98 (s, 1H), 6.70 (s, 1H), 4.99 (s, 2H), 3.13 (s, 6H), 3.33 (s, 3H), 2.24 (s, 3H).

**<sup>13</sup>C NMR (3ma)** (101 MHz, CDCl<sub>3</sub>) δ 160.0, 152.0, 143.4, 139.2, 133.2, 130.4, 126.8, 121.5, 120.8, 115.0, 97.8, 66.1, 38.4 (2C), 20.8, 15.9.

**M.p.** = 143-145 °C

**HRMS (ESI):** Calculated for C<sub>16</sub>H<sub>18</sub>N<sub>2</sub>O [M+H]<sup>+</sup> : 255.1492 (100) found 255.1496 (100).

**8-bromo-*N,N,7,9*-tetramethyl-5*H*-chromeno[3,4-*c*]pyridin-2-amine (3na) and 8-bromo-*N,N,7,9*-tetramethyl-5*H*-chromeno[4,3-*c*]pyridin-3-amine (3na')**

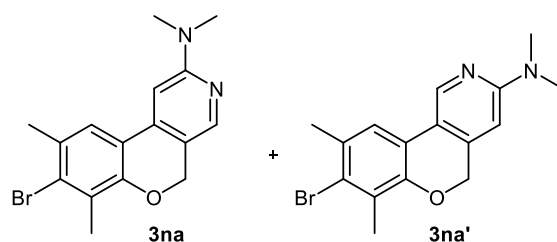

Chemical Formula: C<sub>16</sub>H<sub>17</sub>BrN<sub>2</sub>O

Prepared according to a modification of the general procedure **C** using **1n** (100 mg, 380 μmol, 1.0 equiv.), dimethylcyanamide **2a** (46 μL, 570 μmol, 1.5 equiv.), [Cp\**Ru*(MeCN)<sub>3</sub>]PF<sub>6</sub> (9.6 mg, 19 μmol, 0.05 equiv.), the reaction was heated to 100°C in toluene for 64 hours. After flash column chromatography (petroleum ether/EtOAc ; 98:2 to 90:10), the expected product was obtained as a white solid (37 mg, 111 μmol, 29%). Regioisomeric ratio (**3na/3na'**) : (59:41).

<sup>1</sup>H NMR (**3na**) (400 MHz, CDCl<sub>3</sub>) δ 8.05 (d, *J* = 0.3 Hz, 1H), 6.85 (s, 1H), 6.72 (s, 1H), 4.83 (s, 2H), 3.12 (s, 6H), 2.79 (s, 3H), 2.42 (s, 3H).

<sup>13</sup>C NMR (**3na**) (101 MHz, CDCl<sub>3</sub>) δ 159.7, 156.1, 143.8, 140.7, 139.1, 136.0, 122.5, 122.0, 117.4, 116.5, 103.0, 66.7, 38.5 (2C), 24.6, 23.6.

<sup>1</sup>H NMR (**3na'**) (400 MHz, CDCl<sub>3</sub>) δ 8.48 (s, 1H), 6.81 (s, 1H), 6.35 (d, *J* = 0.5 Hz 1H), 4.82 (s, 2H), 3.14 (s, 6H), 2.73 (s, 3H), 2.40 (s, 3H).

<sup>13</sup>C NMR (**3na'**) (101 MHz, CDCl<sub>3</sub>) δ 159.7, 153.9, 146.1, 143.6, 137.5, 133.9, 122.6, 121.4, 116.8, 115.3, 101.1, 68.8, 38.3 (2C), 24.4, 23.8.

M.p. = 162-164 °C

HRMS (ESI): Calculated for C<sub>16</sub>H<sub>17</sub>BrN<sub>2</sub>O [M+H]<sup>+</sup> : 333.0597 (100), 335.0577 (97) found 333.0600 (100), 335.0580 (97).

***N,N*,4-trimethyl-5H-chromeno[3,4-*c*]pyridin-2-amine (3oa) and *N,N*,4-trimethyl-5H-chromeno[4,3-*c*]pyridin-3-amine (3oa')**

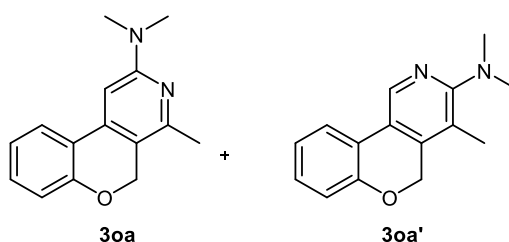

Chemical Formula: C<sub>15</sub>H<sub>16</sub>N<sub>2</sub>O

Prepared according to a modification of the general procedure **C** using **1o** (100 mg, 587 μmol, 1.0 equiv.) and dimethylcyanamide **2a** (71 μL, 881 μmol, 1.5 equiv.), the reaction was heated to 100 °C for five days. After flash column chromatography (petroleum ether/EtOAc ; 95:5 to 80:20), the expected product was obtained as a yellow solid (73 mg, 304 μmol, 52%). Regioisomeric ratio (**3oa/3oa'**) : (>99:1).

<sup>1</sup>H NMR (**3oa**) (400 MHz, CDCl<sub>3</sub>) δ 7.72 (dd, *J* = 7.8, 1.6 Hz, 1H), 7.30-7.25 (m, 1H), 7.02 (dt, *J* = 7.5, 1.1 Hz, 1H), 6.98 (dd, *J* = 8.1, 1.1 Hz, 1H), 6.61 (s, 1H), 5.08 (s, 2H), 3.12 (s, 6H), 2.38 (s, 3H).

<sup>13</sup>C NMR (**3oa**) (101 MHz, CDCl<sub>3</sub>) δ 159.0, 155.7, 151.4, 138.6, 130.7, 124.0, 122.0, 121.9, 117.6, 112.6, 95.5, 65.4, 38.2 (2C), 21.6.

M.p. = 85-87 °C

HRMS (ESI): Calculated for C<sub>15</sub>H<sub>16</sub>N<sub>2</sub>O [M+H]<sup>+</sup> : 241.1335 (100) found 241.1338 (100).

**2-(pyrrolidin-1-yl)-5H-chromeno[3,4-c]pyridine (3ad) and 3-(pyrrolidin-1-yl)-5H-chromeno[4,3-c]pyridine (3ad')**

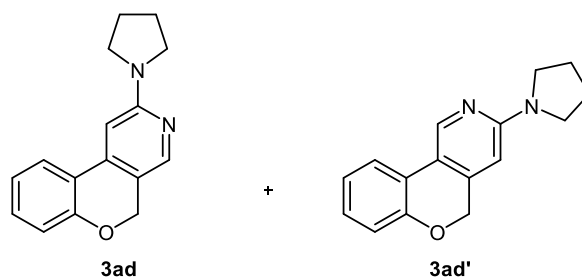

Chemical Formula: C<sub>16</sub>H<sub>16</sub>N<sub>2</sub>O

Prepared according to the general procedure **C** using **1a** (100 mg, 640 μmol, 1.0 equiv.) and pyrrolidine carbonitrile **2d** (97 μL, 960 μmol, 1.5 equiv.). After flash column chromatography (petroleum ether/EtOAc : 80:20 to 60:40), the expected product was obtained as a yellow oil (127 mg, 503 μmol, 79%). Regioisomeric ratio (**3ad/3ad'**) : (96:4).

**<sup>1</sup>H NMR (3ad)** (400 MHz, CDCl<sub>3</sub>) δ 7.95 (s, 1H), 7.71 (dd, *J* = 7.8, 1.5 Hz, 1H), 7.29-7.25 (m, 1H), 7.02 (dt, *J* = 7.6, 1.1 Hz, 1H), 6.97 (dd, *J* = 8.1, 1.0 Hz, 1H), 6.53 (s, 1H), 5.00 (s, 2H), 3.47 (t, *J* = 6.6 Hz, 4H), 1.99 (m, 4H).

**<sup>13</sup>C NMR (3ad)** (101 MHz, CDCl<sub>3</sub>) δ 157.9, 156.0, 143.9, 138.4, 130.9, 123.8, 121.9, 121.6, 117.8, 114.3, 98.2, 66.2, 46.9 (2C), 25.6 (2C).

**HRMS (ESI):** Calculated for C<sub>16</sub>H<sub>16</sub>N<sub>2</sub>O [M+H]<sup>+</sup> : 253.1335 (100), found 253.1336 (100).

**9-methyl-2-(pyrrolidin-1-yl)-5H-chromeno[3,4-c]pyridine (3bd) and 9-methyl-3-(pyrrolidin-1-yl)-5H-chromeno[4,3-c]pyridine (3bd')**

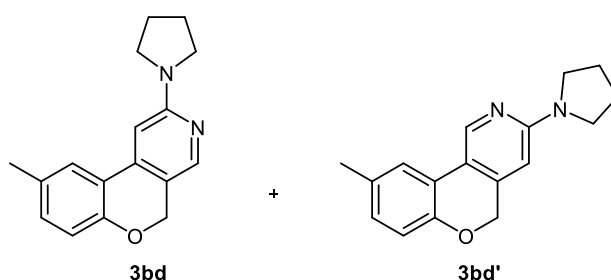

Chemical Formula: C<sub>17</sub>H<sub>18</sub>N<sub>2</sub>O

Prepared according to the general procedure **C** using **1b** (100 mg, 587 μmol, 1.0 equiv.) and pyrrolidine carbonitrile **2d** (89 μL, 881 μmol, 1.5 equiv.). After flash column chromatography (petroleum ether/EtOAc : 80:20 to 70:30), the expected product was obtained as brown oil (134 mg, 503 μmol, 86%). Regioisomeric ratio (**3bd/3bd'**) : (96:4).

**<sup>1</sup>H NMR (3bd)** (400 MHz, CDCl<sub>3</sub>) δ 7.97 (s, 1H), 7.52 (d, *J* = 1.6 Hz, 1H), 7.10 (dd, *J* = 8.2, 1.8 Hz, 1H), 6.89 (d, *J* = 8.2 Hz, 1H), 6.56 (s, 1H), 4.99 (s, 2H), 3.52 (t, *J* = 6.6 Hz, 4H), 2.36 (s, 3H), 2.03 (m, 4H).

**<sup>13</sup>C NMR (3bd)** (101 MHz, CDCl<sub>3</sub>) δ 158.0, 153.9, 144.0, 138.7, 131.8, 131.3, 124.1, 121.4, 117.7, 114.6, 98.2, 66.4, 47.0 (2C), 25.7 (2C), 21.0.

**HRMS (ESI):** Calculated for C<sub>17</sub>H<sub>18</sub>N<sub>2</sub>O [M+H]<sup>+</sup> : 267.1492 (100) found 267.1494 (100).

**9-(*tert*-butyl)-2-(pyrrolidin-1-yl)-5*H*-chromeno[3,4-*c*]pyridine (3dd) and 9-(*tert*-butyl)-2-(pyrrolidin-1-yl)-5*H*-chromeno[4,3-*c*]pyridine (3dd')**

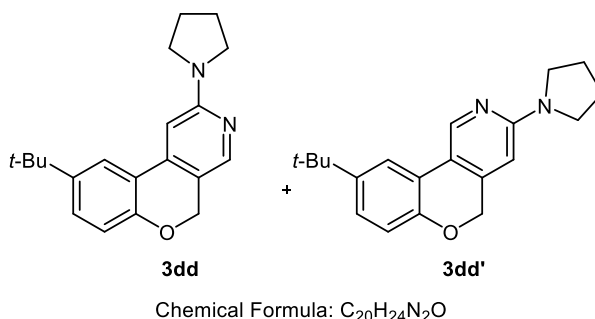

Prepared according to the general procedure **C** using **1d** (100 mg, 471 μmol, 1.0 equiv.) and pyrrolidine carbonitrile **2d** (72 μL, 707 μmol, 1.5 equiv.). After flash column chromatography (petroleum ether/EtOAc ; 75:15), the expected product was obtained as a yellow solid (112 mg, 363 μmol, 77%). Regioisomeric ratio (**3dd/3dd'**) : (94:6).

**<sup>1</sup>H NMR (3dd)** (400 MHz, CDCl<sub>3</sub>) δ 7.97 (d, *J* = 0.6 Hz, 1H), 7.71 (d, *J* = 2.4 Hz, 1H), 7.34 (dd, *J* = 8.6, 2.4 Hz, 1H), 6.93 (d, *J* = 8.6 Hz, 1H), 6.58 (s, 1H), 5.00 (s, 2H), 3.55-3.52 (m, 4H), 2.04-2.01 (m, 4H), 1.37 (s, 9H).

**<sup>13</sup>C NMR (3dd)** (101 MHz, CDCl<sub>3</sub>) δ 158.0, 153.8, 144.7, 143.9, 138.9, 128.3, 120.9, 120.1, 117.4, 114.6, 98.0, 66.3, 47.0 (2C) , 34.5, 31.6 (3C), 25.6 (2C).

**M.p.** = 162-164 °C

**HRMS (ESI):** Calculated for C<sub>20</sub>H<sub>24</sub>N<sub>2</sub>O [M+H]<sup>+</sup> : 309.1961 (100) found 309.1964 (100).

**9-phenyl-2-(pyrrolidin-1-yl)-5H-chromeno[3,4-c]pyridine (3ed) and 9-phenyl-3-(pyrrolidine-1-yl)-5H-chromeno[4,3-c]pyridine (3ed')**

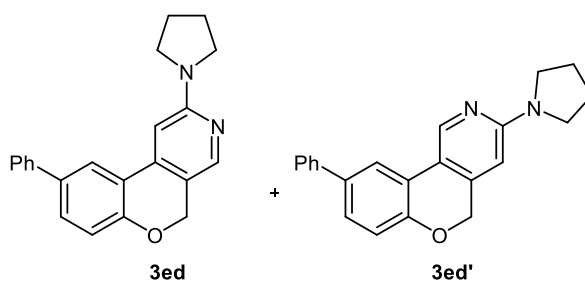

Chemical Formula:  $C_{22}H_{20}N_2O$

Prepared according to the general procedure **D** using **1e** (100 mg, 431  $\mu$ mol, 1.0 equiv.) and pyrrolidine carbonitrile **2d** (65  $\mu$ L, 646  $\mu$ mol, 1.5 equiv.). After flash column chromatography (petroleum ether/EtOAc ; 90:10 to 80:20), the expected product was obtained as a brown solid (100 mg, 304  $\mu$ mol, 71%). Regioisomeric ratio (**3ed/3ed'**) : (92:8).

**$^1H$  NMR (3ed)** (400 MHz,  $CDCl_3$ )  $\delta$  8.01 (s, 1H), 7.92 (d,  $J$  = 2.2 Hz, 1H), 7.62-7.60 (m, 2H), 7.51 (dd,  $J$  = 8.4, 2.2 Hz, 1H), 7.48-7.44 (m, 2H), 7.38-7.34 (m, 1H), 7.07 (d,  $J$  = 8.4 Hz, 1H), 6.62 (s, 1H), 5.06 (s, 2H), 3.53 (m, 4H), 2.05-2.01 (m, 4H).

**$^{13}C$  NMR (3ed)** (101 MHz,  $CDCl_3$ )  $\delta$  158.0, 155.6, 144.0, 140.8, 138.4, 135.3, 129.8, 128.9 (2C), 127.1, 127.0 (2C), 122.5, 121.8, 118.2, 114.3, 98.2, 66.5, 47.0 (2C), 25.6 (2C).

**M.p.** = 137-139  $^{\circ}C$

**HRMS (ESI):** Calculated for  $C_{22}H_{20}N_2O$   $[M+H]^+$  : 329.1648 (100) found 329.1651 (100).

**9-fluoro-2-(pyrrolidin-1-yl)-5H-chromeno[3,4-c]pyridine (3fd) and 9-fluoro-3-(pyrrolidin-1-yl)-5H-chromeno[4,3-c]pyridine (3fd')**

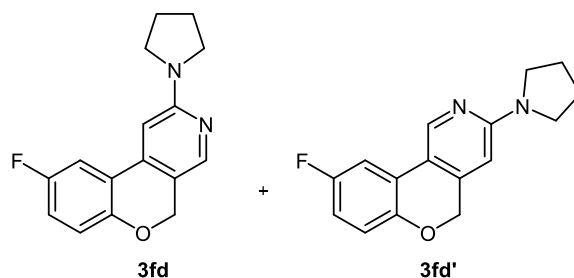

Chemical Formula:  $C_{16}H_{15}FN_2O$

Prepared according to the general procedure **C** using **1f** (100 mg, 574  $\mu$ mol, 1.0 equiv.) and pyrrolidine carbonitrile **2d** (87  $\mu$ L, 861  $\mu$ mol, 1.5 equiv.). After flash column chromatography (petroleum ether/EtOAc ; 90:10 to 75:25), the expected product was obtained as a brown solid (129 mg, 477  $\mu$ mol, 83%). Regioisomeric ratio (**3fd/3fd'**) : (94:6).

**<sup>1</sup>H NMR (3fd)** (400 MHz, CDCl<sub>3</sub>) δ 7.95 (s, 1H), 7.35 (dd, *J* = 9.0, 2.9 Hz, 1H), 6.98-6.89 (m, 2H), 6.42 (s, 1H), 4.96 (s, 2H), 3.47 (m, 4H), 2.00 (m, 4H).

**<sup>13</sup>C NMR (3fd)** (101 MHz, CDCl<sub>3</sub>) δ 158.0 (d, *J* = 240.4 Hz), 157.9, 152.0, 144.1, 137.7, 122.7 (d, *J* = 8.9 Hz), 119.0 (d, *J* = 8.1 Hz), 117.5 (d, *J* = 24.2 Hz), 114.1, 109.9 (d, *J* = 24.2 Hz), 98.3, 66.4, 46.9 (2C), 25.6 (2C).

**<sup>19</sup>F NMR** (376.5 MHz, CDCl<sub>3</sub>) δ = -121.4.

**M.p.** = 99-101 °C

**HRMS (ESI):** Calculated for C<sub>16</sub>H<sub>15</sub>FN<sub>2</sub>O [M+H]<sup>+</sup> : 245.1085 (100) found 245.1090 (100).

**2-(pyrrolidin-1-yl)-5H-chromeno[3,4-c]pyridine-9-carbonitrile (3id) and 3-(pyrrolidin-1-yl)-5H-chromeno[4,3-c]pyridine-9-carbonitrile (3id')**

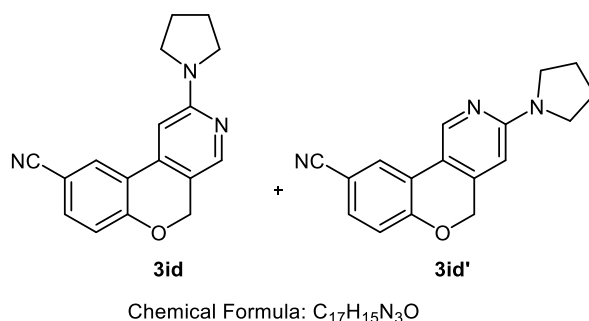

Prepared according to the general procedure **D** using **1i** (100 mg, 552 μmol, 1.0 equiv.) and pyrrolidine carbonitrile **2d** (84 μL, 828 μmol, 1.5 equiv.). After flash column chromatography (petroleum ether/EtOAc ; 80:20), the expected product was obtained as a yellow solid (118 mg, 425 μmol, 77%). Regioisomeric ratio (**3id/3id'**) : (93:7).

**<sup>1</sup>H NMR (3id)** (400 MHz, CDCl<sub>3</sub>) δ 7.99 (d, *J* = 2.0 Hz, 1H), 7.95 (d, *J* = 0.6 Hz, 1H), 7.51 (dd, *J* = 8.5, 2.0 Hz, 1H), 6.99 (d, *J* = 8.5 Hz, 1H), 6.47 (s, 1H), 5.08 (s, 2H), 3.50 (m, 4H), 2.05-2.01 (m, 4H).

**<sup>13</sup>C NMR (3id)** (101 MHz, CDCl<sub>3</sub>) δ 159.3, 157.9, 144.5, 136.2, 134.3, 128.4, 122.4, 119.1, 119.0, 112.9, 105.3, 98.1, 66.7, 47.0 (2C), 25.6 (2C).

**M.p.** = 160-162 °C

**HRMS (ESI):** Calculated for C<sub>17</sub>H<sub>15</sub>N<sub>3</sub>O [M+H]<sup>+</sup> : 278.1288 (100) found 278.1294 (100).

***N*-benzyl-*N*-methyl-5*H*-chromeno[3,4-*c*]pyridin-2-amine (3ab) and *N*-benzyl-*N*-methyl-5*H*-chromeno[4,3-*c*]pyridin-3-amine (3ab')**

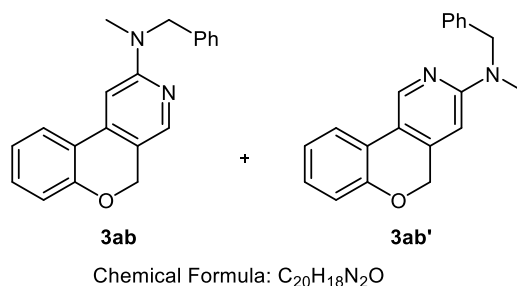

Prepared according to the general procedure **C** using **1a** (100 mg, 640 μmol, 1.0 equiv.) and *N*-benzyl-*N*-methylcyanamide **2b** (140 mg, 960 μmol, 1.5 equiv.). After flash column chromatography (petroleum ether/EtOAc : 95:5 to 90:10), the expected product was obtained as a yellow solid (165 mg, 546 μmol, 85%). Regioisomeric ratio (**3ab/3ab'**) : (96:4).

<sup>1</sup>H NMR (**3ba**) (400 MHz, CDCl<sub>3</sub>) δ 7.99 (s, 1H), 7.64 (dd, *J* = 7.7, 1.5 Hz, 1H), 7.31-7.20 (m, 6H), 7.02-6.97 (m, 2H), 6.73 (s, 1H), 5.01 (s, 2H), 4.84 (s, 2H), 3.10 (s, 3H).

<sup>13</sup>C NMR (**3ba'**) (101 MHz, CDCl<sub>3</sub>) δ 159.6, 156.0, 143.9, 138.9, 138.8, 131.1, 128.7 (2C), 127.1 (2C), 127.0, 123.9, 122.0, 121.6, 117.9, 115.1, 97.5, 66.2, 53.5, 36.5.

**M.p.** : 104-106 °C

**HRMS (ESI)**: Calculated for C<sub>20</sub>H<sub>18</sub>N<sub>2</sub>O [M+H]<sup>+</sup> : 303.1492 (100) found 303.1495 (100).

***N*-benzyl-9-isopropyl-*N*-methyl-5*H*-chromeno[3,4-*c*]pyridin-2-amine (3cb) and *N*-benzyl-9-isopropyl-*N*-methyl-5*H*-chromeno[4,3-*c*]pyridin-3-amine (3cb')**

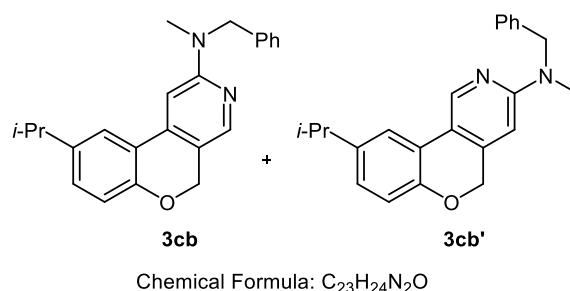

Prepared according to the general procedure **D** using **1c** (100 mg, 504 μmol, 1.0 equiv.) and *N*-benzyl-*N*-methylcyanamide **2b** (111 mg, 757 μmol, 1.5 equiv.). After flash column chromatography (petroleum ether/EtOAc ; 95:5 to 90:10), the expected product was obtained as a yellow solid (75 mg, 218 μmol, 43%). Regioisomeric ratio (**3cb/3cb'**) : (92:8).

**<sup>1</sup>H NMR (3cb)** (400 MHz, CDCl<sub>3</sub>) δ 8.02 (d, *J* = 0.5 Hz, 1H), 7.50 (d, *J* = 2.2 Hz, 1H), 7.34-7.23 (m, 5H), 7.18 (dd, *J* = 8.4, 2.1 Hz, 1H), 6.95 (d, *J* = 8.4 Hz, 1H), 6.78 (s, 1H), 5.02 (s, 2H), 4.89 (s, 2H) 3.15 (s, 3H), 2.93 (sept., *J* = 6.9 Hz, 1H), 1.29 (app. s, 3H), 1.27 (app. s, 3H).

**<sup>13</sup>C NMR (3cb)** (101 MHz, CDCl<sub>3</sub>) δ 159.6, 154.1, 143.8, 142.5, 139.2, 138.9, 129.1, 128.7 (2C), 127.2 (2C), 127.0, 121.5, 121.3, 117.7, 115.4, 97.5, 66.3, 53.5, 36.6, 33.7, 24.3 (2C).

**M.p.** = 110-112 °C

**HRMS (ESI):** Calculated for C<sub>23</sub>H<sub>24</sub>N<sub>2</sub>O [M+H]<sup>+</sup> : 345.1961 (100) found 345.1962 (100).

***N*-benzyl-9-chloro-*N*-methyl-5*H*-chromeno[3,4-*c*]pyridin-2-amine (3gb) and *N*-benzyl-9-chloro-*N*-methyl-5*H*-chromeno[4,3-*c*]pyridin-3-amine (3gb')**

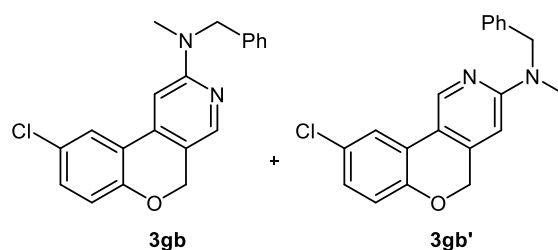

Chemical Formula: C<sub>20</sub>H<sub>17</sub>ClN<sub>2</sub>O

Prepared according to the general procedure **C** using **1g** (100 mg, 525 μmol, 1.0 equiv.) and *N*-benzyl-*N*-methylcyanamide **2b** (115 mg, 787 μmol, 1.0 equiv.). After flash column chromatography (petroleum ether/EtOAc ; 95:5), the expected product was obtained as a white solid (131 mg, 389 μmol, 74%). Regioisomeric ratio (**3gb/3gb'**) : (93:7).

**<sup>1</sup>H NMR (3gb)** (400 MHz, CDCl<sub>3</sub>) δ 7.97 (d, *J* = 0.5 Hz, 1H), 7.57 (d, *J* = 2.5 Hz, 1H), 7.28-7.16 (m, 6H), 6.87 (d, *J* = 8.7 Hz, 1H), 6.63 (s, 1H), 4.97 (s, 2H), 4.83 (s, 2H), 3.07 (s, 3H).

**<sup>13</sup>C NMR (3gb)** (101 MHz, CDCl<sub>3</sub>) δ 159.6, 154.5, 144.1, 138.6, 137.8, 130.7, 128.7 (2C), 127.2 (2C), 127.1, 127.0, 123.6, 123.0, 119.3, 114.6, 97.4, 66.3, 53.3, 36.4.

**M.p.** = 142-144 °C

**HRMS (ESI):** Calculated for C<sub>20</sub>H<sub>17</sub>ClN<sub>2</sub>O [M+H]<sup>+</sup> : 337.1102 (100), 339.1073 (32) found 337.1106 (100), 339.1081 (32).



***N*-benzyl-9-bromo-*N*-methyl-5*H*-chromeno[3,4-*c*]pyridin-2-amine (3hb) and *N*-benzyl-9-bromo-*N*-methyl-5*H*-chromeno[4,3-*c*]pyridin-3-amine (3hb')**

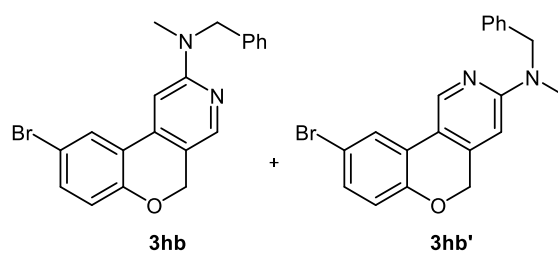

Chemical Formula: C<sub>20</sub>H<sub>17</sub>BrN<sub>2</sub>O

Prepared according to the general procedure **C** using **1h** (100 mg, 425 μmol, 1.0 equiv.) and *N*-benzyl-*N*-methylcyanamide **2b** (93 mg, 638 μmol, 1.5 equiv.). After flash column chromatography (petroleum ether/EtOAc ; 97:3 to 95:5), the expected product was obtained as a pale-yellow solid (131 mg, 344 μmol, 81%). Regioisomeric ratio (**3hb/3hb'**) : (94:6).

<sup>1</sup>H NMR (**3hb**) (400 MHz, CDCl<sub>3</sub>) δ 7.95 (s, 1H), 7.70 (d, *J* = 2.4 Hz, 1H), 7.30-7.18 (m, 6H), 6.81 (d, *J* = 8.7 Hz, 1H), 6.61 (s, 1H), 4.96 (s, 2H), 4.82 (s, 2H), 3.05 (s, 3H).

<sup>13</sup>C NMR (**3hb**) (101 MHz, CDCl<sub>3</sub>) δ 159.5, 155.0, 144.1, 138.6, 137.6, 133.6, 128.6 (2C), 127.2, 127.1 (2C), 126.5, 123.5, 119.7, 114.5, 114.3, 97.3, 66.3, 53.3, 36.4.

**M.p.** = 148-150 °C

**HRMS (ESI):** Calculated for C<sub>20</sub>H<sub>17</sub>BrN<sub>2</sub>O [M+H]<sup>+</sup> : 381.0597 (100), 381.0577 (97) found 381.0599 (100), 381.0579 (97).

***N*-butyl-*N*-methyl-5*H*-chromeno[3,4-*c*]pyridin-2-amine (3ac) and *N*-butyl-*N*-methyl-5*H*-chromeno[4,3-*c*]pyridin-3-amine (3ac')**

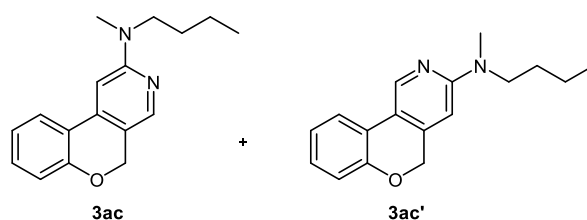

Chemical Formula: C<sub>17</sub>H<sub>20</sub>N<sub>2</sub>O

Prepared according to the general procedure **D** using **1a** (100 mg, 640 μmol, 1.0 equiv.) and *N*-butyl-*N*-methylcyanamide **2c** (108 mg, 960 μmol, 1.0 equiv.). After flash column chromatography (petroleum ether/EtOAc : 98:2 to 95:5), the expected product was obtained as a pale-brown oil (111 mg, 414 μmol, 65%). Regioisomeric ratio (**3ac/3ac'**) : (95:5).



**8-methoxy-2-(pyrrolidin-1-yl)-5H-chromeno[3,4-c]pyridine (3jd) and 8-methoxy-3-(pyrrolidin-1-yl)-5H-chromeno[4,3-c]pyridine (3jd')**

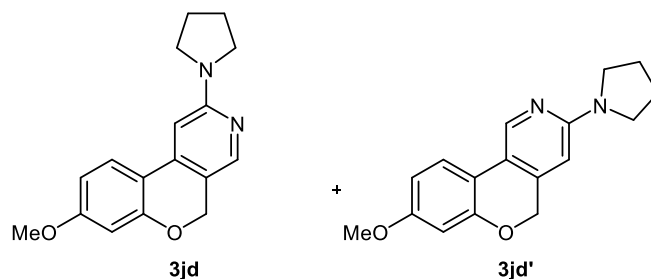

Prepared according to the general procedure **D** using **1j** (100 mg, 537 μmol, 1.0 equiv.) and morpholine carbonitrile **2d** (82 μL, 805 μmol, 1.5 equiv.). After flash column chromatography (petroleum ether/EtOAc : 80:20 to 50:50), the expected product was obtained as a brown solid (104 mg, 368 μmol, 68%). Regioisomeric ratio (**3jd/3jd'**) : (97:3).

**<sup>1</sup>H NMR (3jd)** (400 MHz, CDCl<sub>3</sub>) δ 7.91 (d, *J* = 0.6 Hz, 1H), 7.61 (d, *J* = 8.6 Hz, 1H), 6.59 (dd, *J* = 8.6, 2.6 Hz, 1H), 6.51 (d, *J* = 2.5 Hz, 1H), 6.45 (s, 1H), 4.99 (s, 2H), 3.79 (s, 3H), 3.47 (m, 4H), 1.99 (m, 4H).

**<sup>13</sup>C NMR (3jd)** (101 MHz, CDCl<sub>3</sub>) δ 162.1, 157.9, 157.4, 143.7, 138.6, 124.9, 114.5, 113.5, 109.1, 102.3, 97.3, 66.6, 55.5, 46.9 (2C), 25.6 (2C).

**M.p.** = 142-144 °C

**HRMS (ESI):** Calculated for C<sub>17</sub>H<sub>18</sub>N<sub>2</sub>O<sub>2</sub> [M+H]<sup>+</sup> : 283.1441 (100) found 283.1447 (100).

**2-(pyrrolidin-1-yl)-5H-benzo[5,6]chromeno[3,4-c]pyridine (3kd) and 3-(pyrrolidin-1-yl)-5H-benzo[5,6]chromeno[4,3-c]pyridine (3kd')**

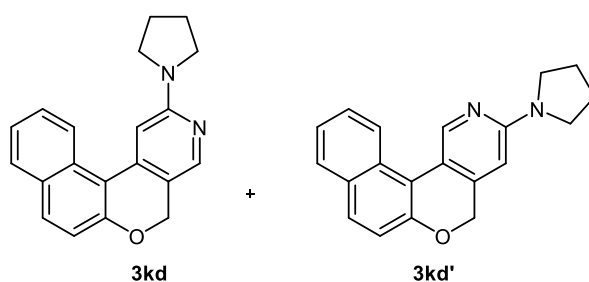

Prepared according to the general procedure **D** using **1k** (100 mg, 485 μmol, 1.0 equiv.) and pyrrolidine carbonitrile **2d** (74 μL, 728 μmol, 1.5 equiv.). After flash column chromatography (petroleum ether/EtOAc ; 90:10 to 80:20), the expected product was obtained as a yellow solid (79 mg, 261 μmol, 54%). Regioisomeric ratio (**3kd/3kd'**) : (89:11).

**<sup>1</sup>H NMR (3kd)** (400 MHz, CDCl<sub>3</sub>) δ 8.61 (d, *J* = 8.5 Hz, 1H), 8.11 (s, 1H), 7.85 (d, *J* = 8.0 Hz, 1H), 7.77 (d, *J* = 8.8 Hz, 1H), 7.58-7.54 (m, 1H), 7.42 (t, *J* = 7.8 Hz, 1H), 7.21 (d, *J* = 8.8 Hz, 1H), 6.96 (s, 1H), 4.97 (s, 2H), 3.53 (m, 4H), 2.06-2.02 (m, 4H).

**<sup>13</sup>C NMR (3kd)** (101 MHz, CDCl<sub>3</sub>) δ 157.8, 155.8, 144.2, 138.3, 131.5, 130.7, 130.5, 129.1, 127.3, 124.4, 124.1, 118.7, 116.3, 115.8, 103.0, 67.0, 47.0 (2C), 25.6 (2C).

**<sup>1</sup>H NMR (3kd')** (400 MHz, CDCl<sub>3</sub>) δ 8.86 (s, 1H), 8.51 (d, *J* = 8.5 Hz, 1H), 7.82 (d, *J* = 7.6 Hz, 1H), 7.65 (d, *J* = 8.8 Hz, 1H), 7.52-7.47 (m, 1H), 7.41-7.37 (m, 1H), 7.20 (d, *J* = 8.8 Hz, 1H), 6.29 (s, 1H), 4.95 (s, 2H), 3.55 (m, 4H), 2.08-2.04 (m, 4H).

**<sup>13</sup>C NMR (3kd')** (101 MHz, CDCl<sub>3</sub>) δ 156.2, 152.6, 145.9, 143.3, 130.9, 129.9, 128.9, 128.3, 126.7, 125.0, 124.1, 118.2, 116.6, 114.8, 102.2, 68.7, 47.0 (2C), 25.7 (2C).

**M.p.** = 118-120 °C

**HRMS (ESI):** Calculated for C<sub>20</sub>H<sub>18</sub>N<sub>2</sub>O [M+H]<sup>+</sup> : 303.1492 (100) found 303.1494 (100).

***N*-benzyl-*N*-methyl-5*H*-[1,3]dioxolo[4',5':6,7]chromeno[3,4-*c*]pyridin-2-amine (3lb) and 3-(benzyl(methyl)amino)-5*H*-[1,3]dioxolo[4',5':6,7]chromeno[4,3-*c*]pyridin-9-ylum (3lb')**

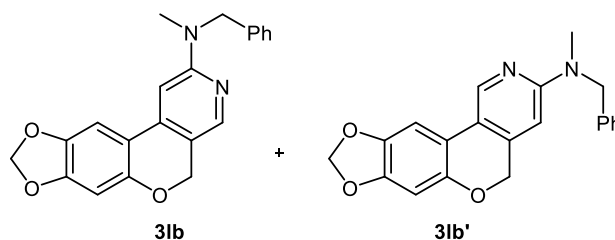

Chemical Formula: C<sub>21</sub>H<sub>18</sub>N<sub>2</sub>O<sub>3</sub>

Prepared according to the general procedure **D** using **1l** (100 mg, 499 μmol, 1.0 equiv.) and *N*-benzyl-*N*-methylcyanamide **2b** (110 mg, 749 μmol, 1.5 equiv.). After flash column chromatography (petroleum ether/EtOAc ; 95:5 to 90:10), the expected product was obtained as a yellow solid (142 mg, 410 μmol, 82%). Regioisomeric ratio (**3lb/3lb'**) : (97:3).

**<sup>1</sup>H NMR (3lb)** (400 MHz, CDCl<sub>3</sub>) δ 7.94 (d, *J* = 0.5 Hz, 1H), 7.32-7.20 (m, 5H), 7.03 (s, 1H), 6.52 (s, 1H), 6.49 (s, 1H), 5.90 (s, 2H), 4.93 (s, 2H), 4.82 (s, 2H), 3.07 (s, 3H).

**<sup>13</sup>C NMR (3lb)** (101 MHz, CDCl<sub>3</sub>) δ 159.6, 152.0, 149.8, 143.6, 143.1, 139.3, 138.8, 128.6 (2C), 127.1 (2C), 127.0, 114.3, 114.2, 102.6, 101.6, 99.6, 96.7, 66.6, 53.4, 36.5.

**M.p.** = 172-174 °C

**HRMS (ESI):** Calculated for C<sub>21</sub>H<sub>18</sub>N<sub>2</sub>O<sub>3</sub> [M+H]<sup>+</sup> : 347.1390 (100) found 347.1395 (100).

**7,9-dimethyl-2-(pyrrolidin-1-yl)-5H-chromeno[3,4-c]pyridine (3md) and 7,9-dimethyl-3-(pyrrolidin-1-yl)-5H-chromeno[4,3-c]pyridine (3md')**

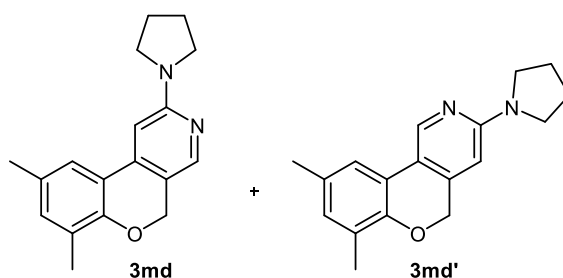

Chemical Formula: C<sub>18</sub>H<sub>20</sub>N<sub>2</sub>O

Prepared according to the general procedure **C** using **1m** (100 mg, 543 μmol, 1.0 equiv.) and pyrrolidine carbonitrile **2d** (83 μL, 814 μmol, 1.5 equiv.). After flash column chromatography (petroleum ether/EtOAc ; 90:10 to 80:20), the expected product was obtained as a brown solid (118 mg, 421 μmol, 78%). Regioisomeric ratio (**3md/3md'**) : (96:4).

**<sup>1</sup>H NMR (3md)** (400 MHz, CDCl<sub>3</sub>) δ 7.95 (s, 1H), 7.35 (s, 1H), 6.96 (s, 1H), 6.52 (s, 1H), 4.97 (s, 2H), 3.49 (m, 4H), 2.31 (s, 3H), 2.22 (s, 3H), 2.01-1.98 (m, 4H).

**<sup>13</sup>C NMR (3md)** (101 MHz, CDCl<sub>3</sub>) δ 157.9, 152.0, 143.6, 138.9, 133.0, 130.3, 126.7, 121.5, 120.7, 114.6, 98.3, 66.1, 46.8 (2C), 25.5 (2C), 20.7, 15.9.

**HRMS (ESI):** [M+H]<sup>+</sup> Calculated for C<sub>18</sub>H<sub>20</sub>N<sub>2</sub>O: 281.1648 (100) found 281.1653 (100).

**5H-chromeno[3,4-c]pyridin-2-amine (3af) and 5H-chromeno[4,3-c]pyridin-3-amine (3af')**

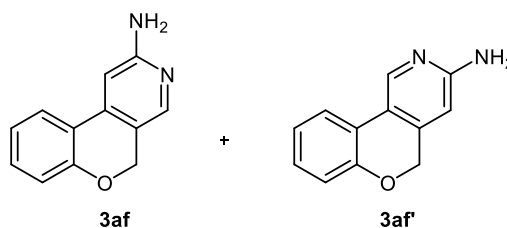

Chemical Formula: C<sub>12</sub>H<sub>10</sub>N<sub>2</sub>O

Prepared according to a modification of the general procedure **C** using **1a** (100 mg, 640 μmol, 1.0 equiv.), cyanamide **2f** (40 mg, 960 μmol, 1.5 equiv.), [Cp\**Ru*(MeCN)<sub>3</sub>]PF<sub>6</sub>] (16.1 mg, 32 μmol, 0.05 equiv.), the reaction was refluxed in anhydrous MeTHF for 5 days. After flash column chromatography (Al<sub>2</sub>O<sub>3</sub>, petroleum ether/EtOAc/Et<sub>3</sub>N ; 49:49:2 to 29:69:2), the expected product was obtained as a brown solid (43 mg, 217 μmol, 34%). Regioisomeric ratio (**3af/3af'**) : (88:12).

**<sup>1</sup>H NMR (3af)** (400 MHz, CDCl<sub>3</sub>) δ 7.91 (s, 1H), 7.67 (dd, *J* = 7.8, 1.5 Hz, 1H), 7.34 (m, 1H), 7.06 (dt, *J* = 7.6, 1.2 Hz, 1H), 7.00 (dd, *J* = 8.2, 1.0 Hz, 1H), 6.76 (s, 1H), 5.04 (s, 2H), 4.52 (bs, 2H).

<sup>13</sup>C NMR (**3af**) (101 MHz, CDCl<sub>3</sub>) δ 158.9, 156.0, 143.8, 139.7, 131.6, 124.0, 122.3, 121.0, 118.0, 117.4, 100.6, 66.2.

HRMS (ESI): [M+H]<sup>+</sup> Calculated for C<sub>12</sub>H<sub>10</sub>N<sub>2</sub>O: 199.0866 (100) found 199.0868 (100).

9-(4-methoxyphenyl)-*N,N*-dimethyl-5*H*-chromeno[3,4-*c*]pyridin-2-amine (**4**) and 9-(4-methoxyphenyl)-*N,N*-dimethyl-5*H*-chromeno[4,3-*c*]pyridin-3-amine (**4'**)

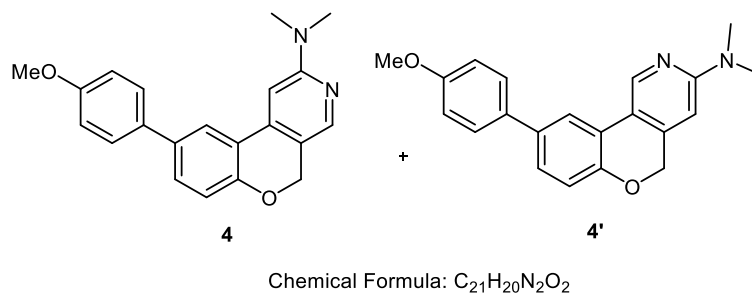

Compound **3ha** (100 mg, 330 μmol, 1.0 equiv.), 4-methoxyphenyl boronic acid (74.8 mg, 490 μmol, 1.5 equiv.), K<sub>2</sub>CO<sub>3</sub> (90.7 mg, 660 μmol, 2.0 equiv.), palladium acetate (3.7 mg, 16.4 μmol, 0.05 equiv.) and CataCXium A (12.9 mg, 36.1 μmol, 0.11 equiv.) were mixed in 3.3 mL of anhydrous DMF, the solution turns to brown. The resulting mixture was stirred overnight at 100 °C under argon. The mixture was diluted with DCM and washed successively with a saturated aqueous solution of NaHCO<sub>3</sub> (10 mL) and brine (10 mL). The organic layer was dried over MgSO<sub>4</sub>, filtered, and concentrated under reduced pressure. The residue was purified by flash column chromatography (SiO<sub>2</sub>, petroleum ether/EtOAc ; 80:20 to 60:40) to afford the product as a white solid (97 mg, 292 μmol, 89%). Regioisomeric ratio (**4/4'**) : (94:6).

<sup>1</sup>H NMR (**4**) (400 MHz, CDCl<sub>3</sub>) δ 8.02 (s, 1H), 7.86 (d, *J* = 2.2 Hz, 1H), 7.54-7.52 (m, 2H), 7.46 (dd, *J* = 8.4, 2.2 Hz, 1H), 7.05 (d, *J* = 8.4 Hz, 1H), 7.00-6.98 (m, 2H), 6.78 (s, 1H), 5.06 (s, 2H), 3.85 (s, 3H), 3.15 (s, 6H).

<sup>13</sup>C NMR (**4**) (101 MHz, CDCl<sub>3</sub>) δ 160.1, 159.1, 155.1, 143.8, 138.7, 135.0, 133.4, 129.5, 128.0 (2C), 122.0, 121.8, 118.2, 114.7, 114.3 (2C), 97.6, 66.4, 55.4, 38.5 (2C).

M.p. = 106-108 °C

HRMS (ESI): Calculated for C<sub>21</sub>H<sub>20</sub>N<sub>2</sub>O<sub>2</sub> [M+H]<sup>+</sup> : 333.1598 (100) found 333.1602 (100).

**Tert-butyl (E)-3-(2-(dimethylamino)-5H-chromeno[3,4-c]pyridin-9-yl)acrylate (5) and tert-butyl (E)-3-(3-(dimethylamino)-5H-chromeno[4,3-c]pyridin-9-yl)acrylate (5')**

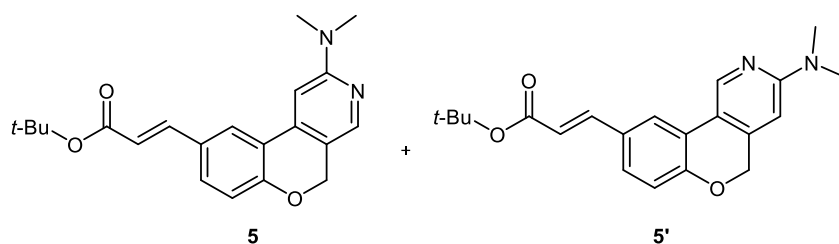

Chemical Formula: C<sub>21</sub>H<sub>24</sub>N<sub>2</sub>O<sub>3</sub>

Compound **3ha** (100 mg, 330 μmol, 1.0 equiv.), tri(*o*-tolyl)phosphine (7.98 mg, 26.2 μmol, 0.08 equiv.), palladium(II) acetate (1.47 mg, 6.55 μmol, 0.02 equiv.), were mixed in 3.3 mL of an anhydrous mixture of DMF/Et<sub>3</sub>N (10/1). Under argon, *t*-butyl-acrylate (238 μL, 1.64 mmol, 5.0 equiv.) was added, the solution turns to brown. The resulting mixture was stirred overnight at 100 °C under argon. The mixture was diluted with DCM and washed successively with a saturated aqueous solution of NH<sub>4</sub>Cl (10 mL), water (10 mL) and brine (10 mL). The organic layer was dried over MgSO<sub>4</sub>, filtered, and concentrated under reduced pressure. The residue was purified by flash column chromatography (SiO<sub>2</sub>, petroleum ether/EtOAc ; 80:20 to 70:30) to afford the product as a pale-yellow solid (107 mg, 304 μmol, 92%). Regioisomeric ratio (**5/5'**) : (94:6).

**<sup>1</sup>H NMR (5)** (400 MHz, CDCl<sub>3</sub>) δ 8.00 (d, *J* = 0.6 Hz, 1H), 7.86 (d, *J* = 2.1 Hz, 1H), 7.60 (d, *J* = 16.0 Hz, 1H), 7.46 (dd, *J* = 8.5, 2.1 Hz, 1H), 6.99 (d, *J* = 8.5 Hz, 1H), 6.73 (s, 1H), 6.33 (d, *J* = 16.0 Hz, 1H), 5.07 (s, 2H), 3.17 (s, 6H), 1.55 (s, 9H).

**<sup>13</sup>C NMR (5)** (101 MHz, CDCl<sub>3</sub>) δ 166.6, 160.2, 157.6, 144.0, 143.1, 138.0, 130.6, 128.8, 123.8, 121.9, 118.9, 118.6, 114.2, 97.6, 80.6, 66.5, 38.6 (2C), 28.4 (3C).

**M.p.** = 157-159 °C

**HRMS (ESI):** Calculated for C<sub>21</sub>H<sub>24</sub>N<sub>2</sub>O<sub>3</sub> [M+H]<sup>+</sup> : 353.1860 (100), 297.1234 (82) found 353.1863 (100), 297.1236 (82).





## VI. NMR spectra

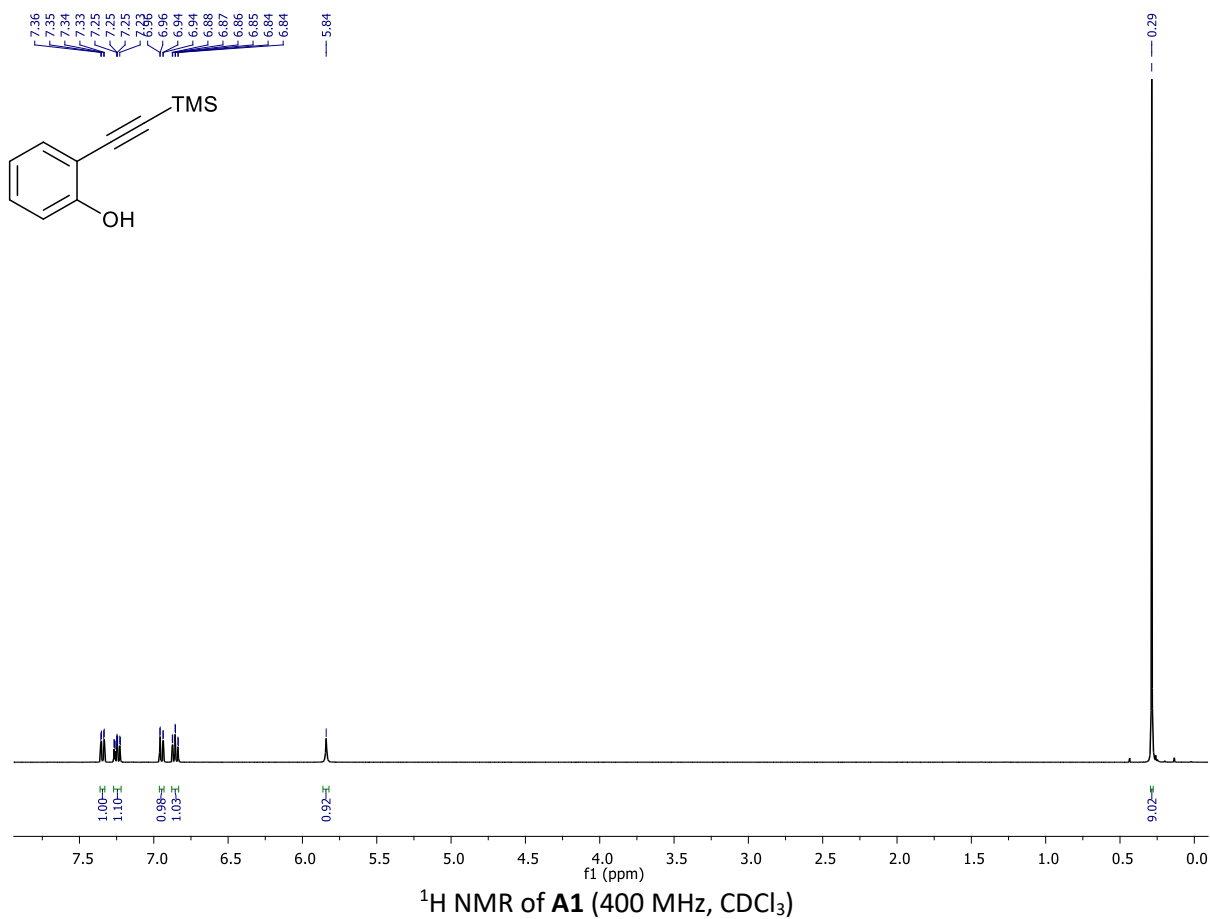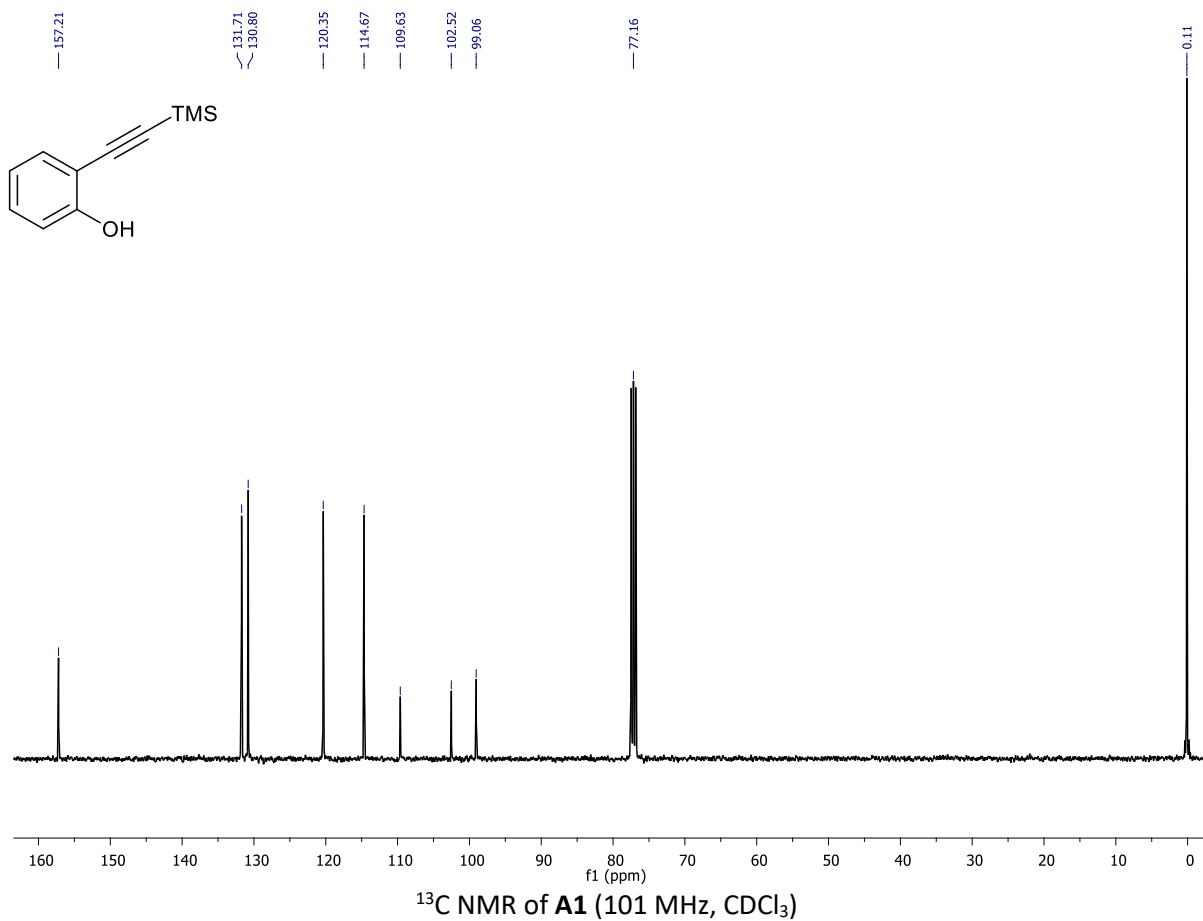

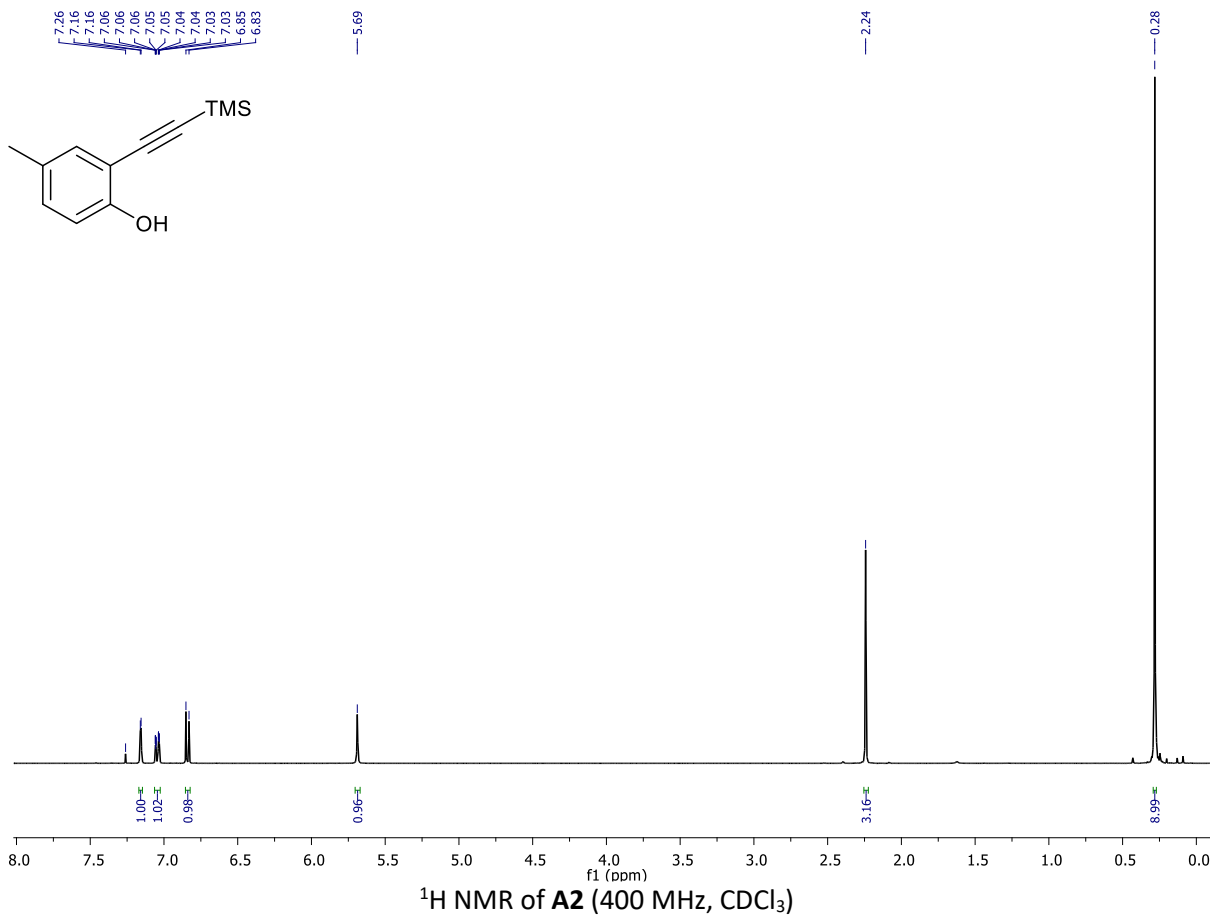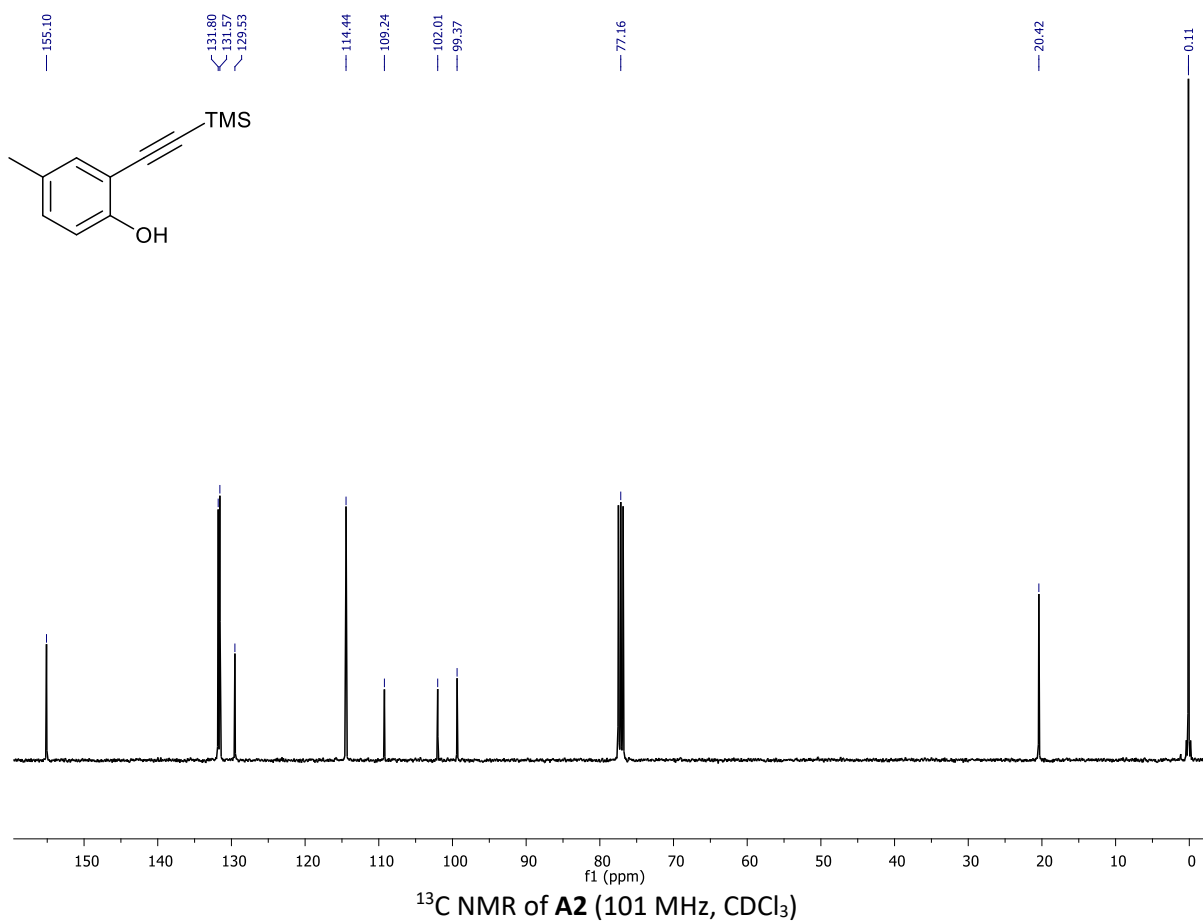

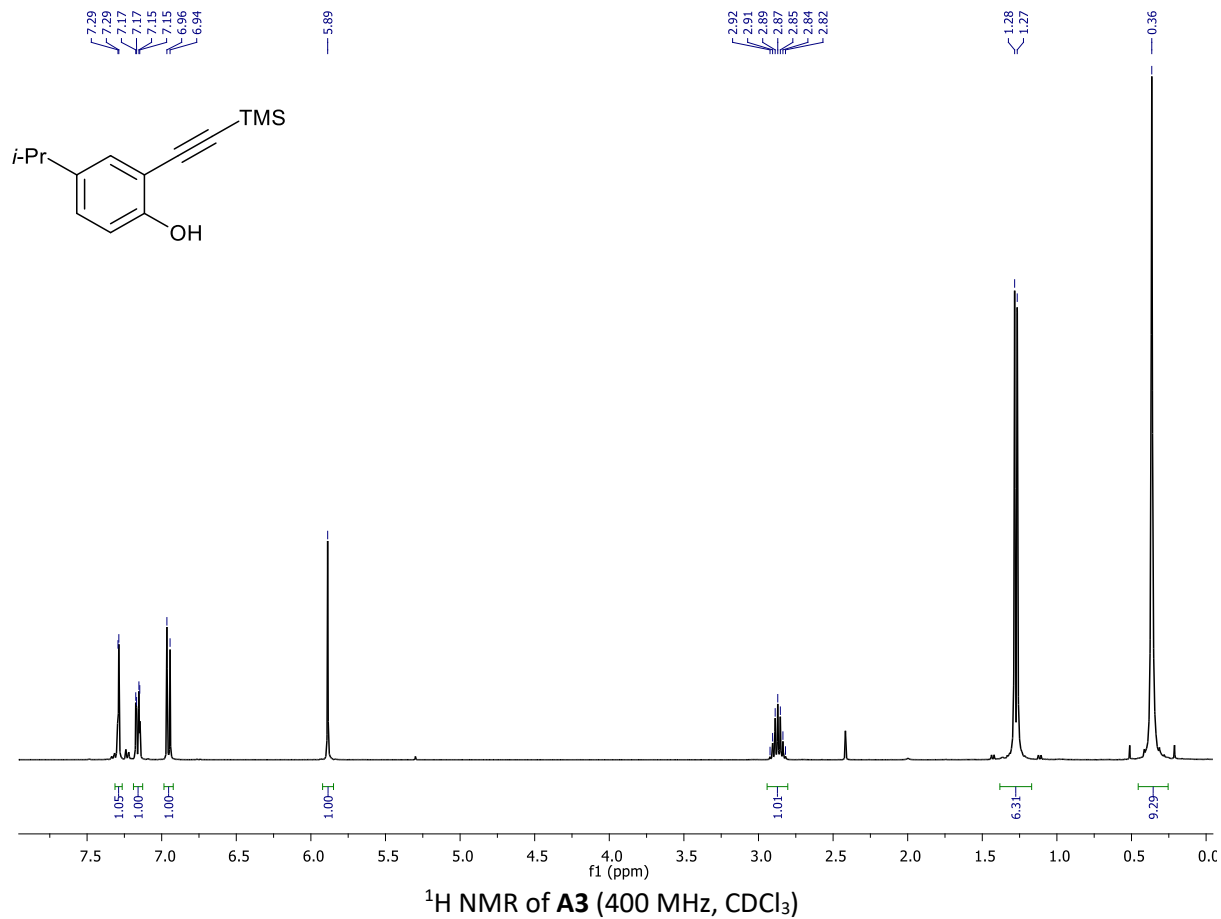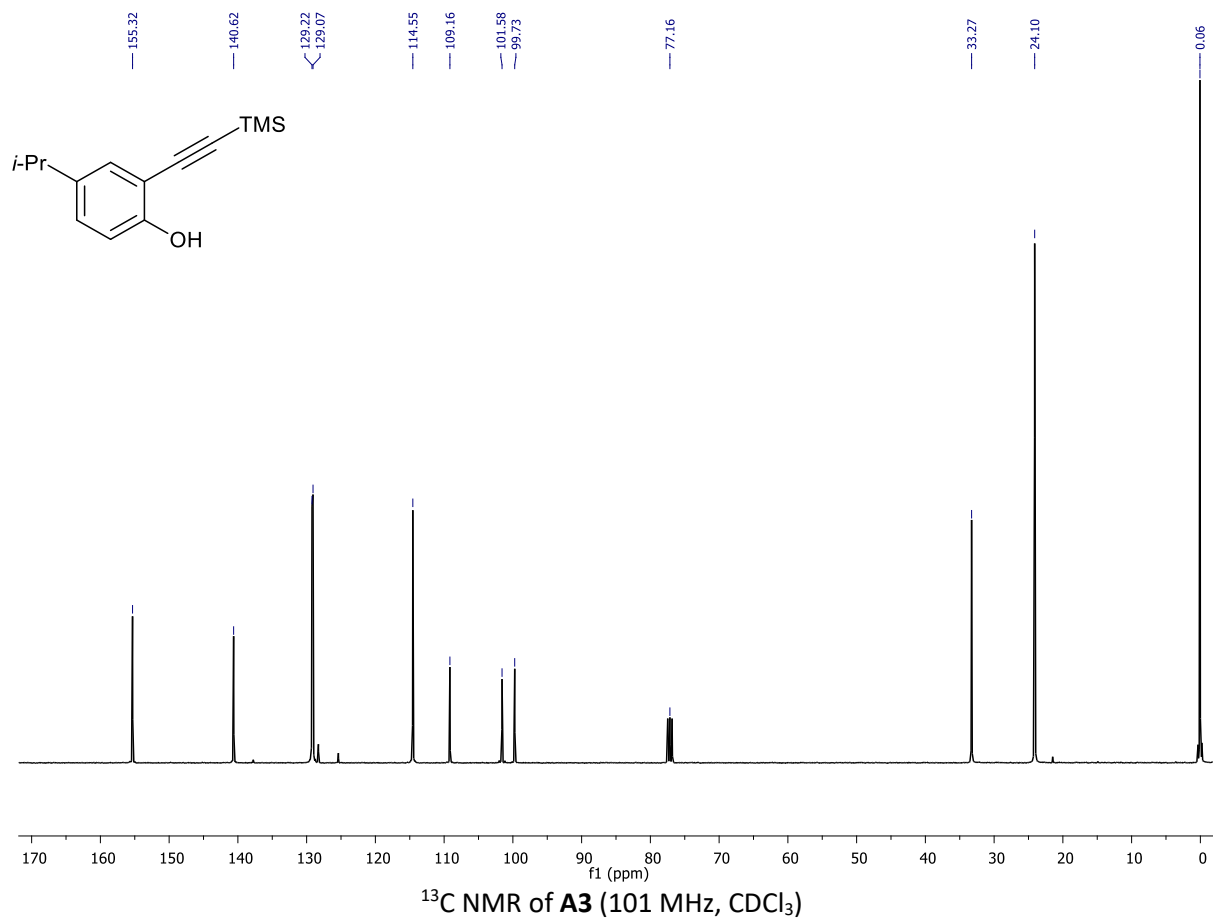

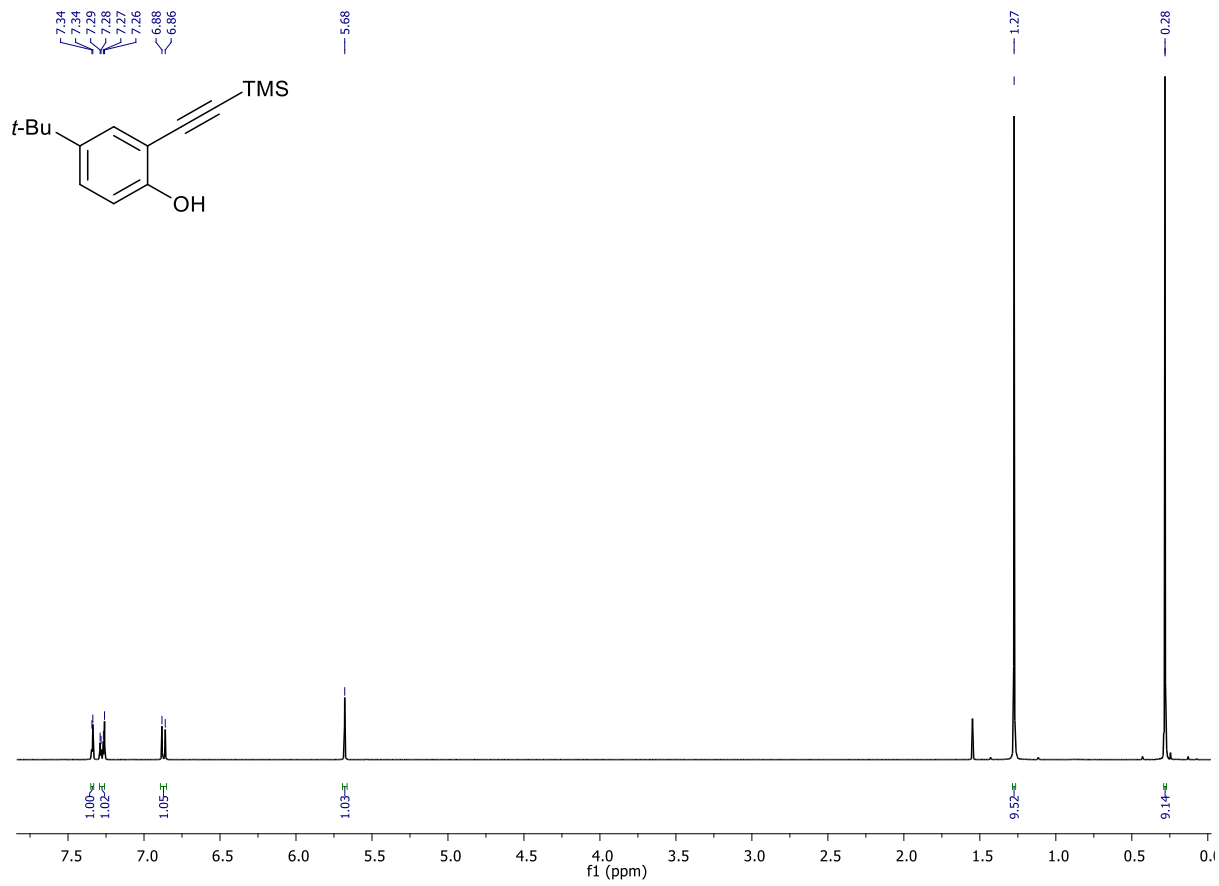

<sup>1</sup>H NMR of **A4** (400 MHz, CDCl<sub>3</sub>)

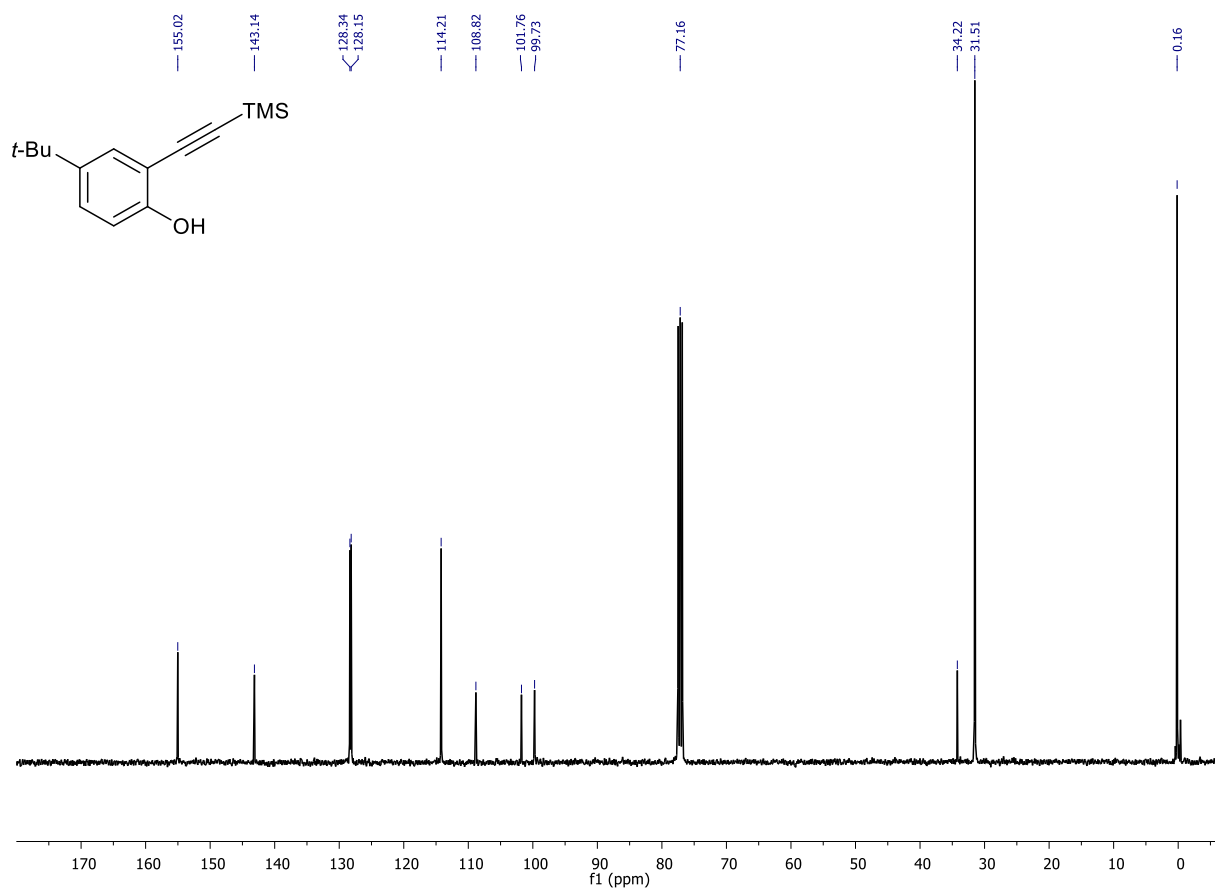

<sup>13</sup>C NMR of **A4** (101 MHz, CDCl<sub>3</sub>)

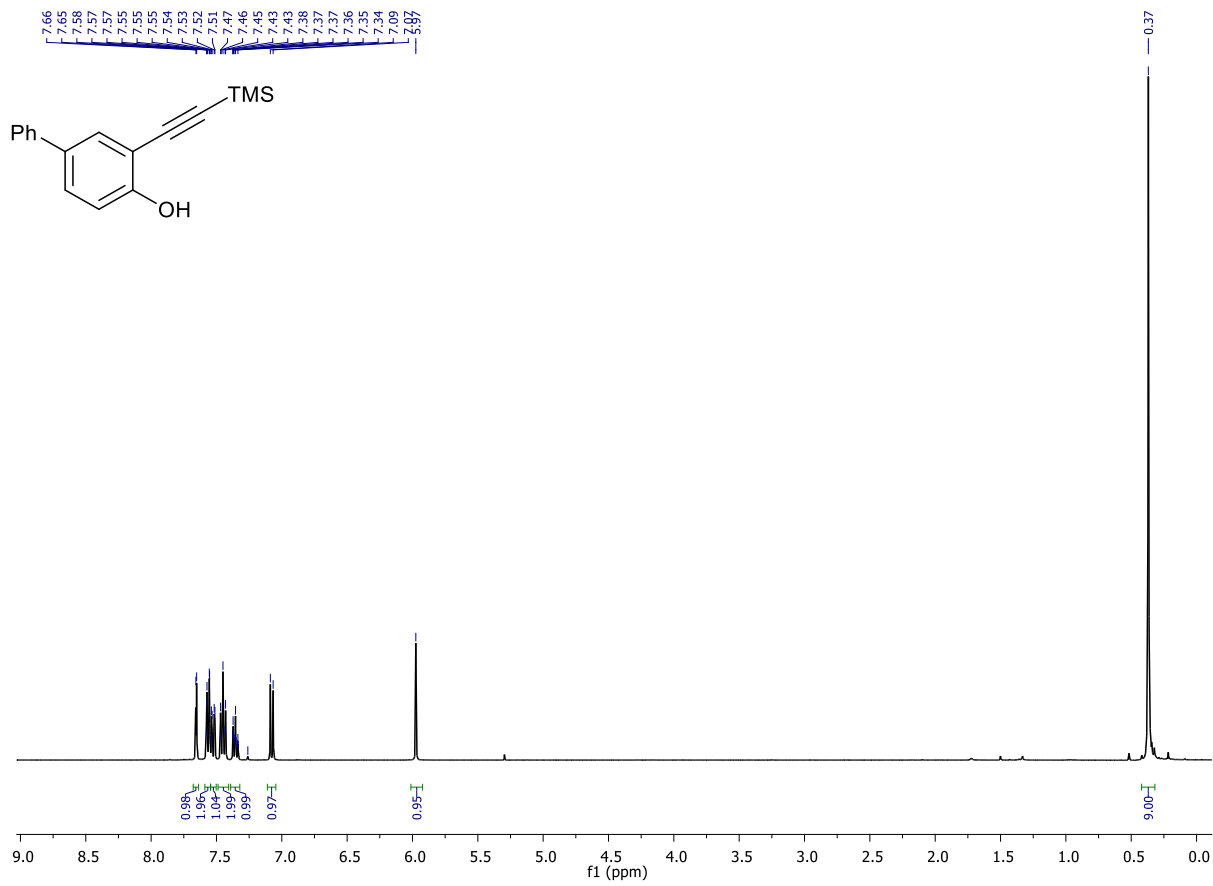

<sup>1</sup>H NMR of **A5** (400 MHz, CDCl<sub>3</sub>)

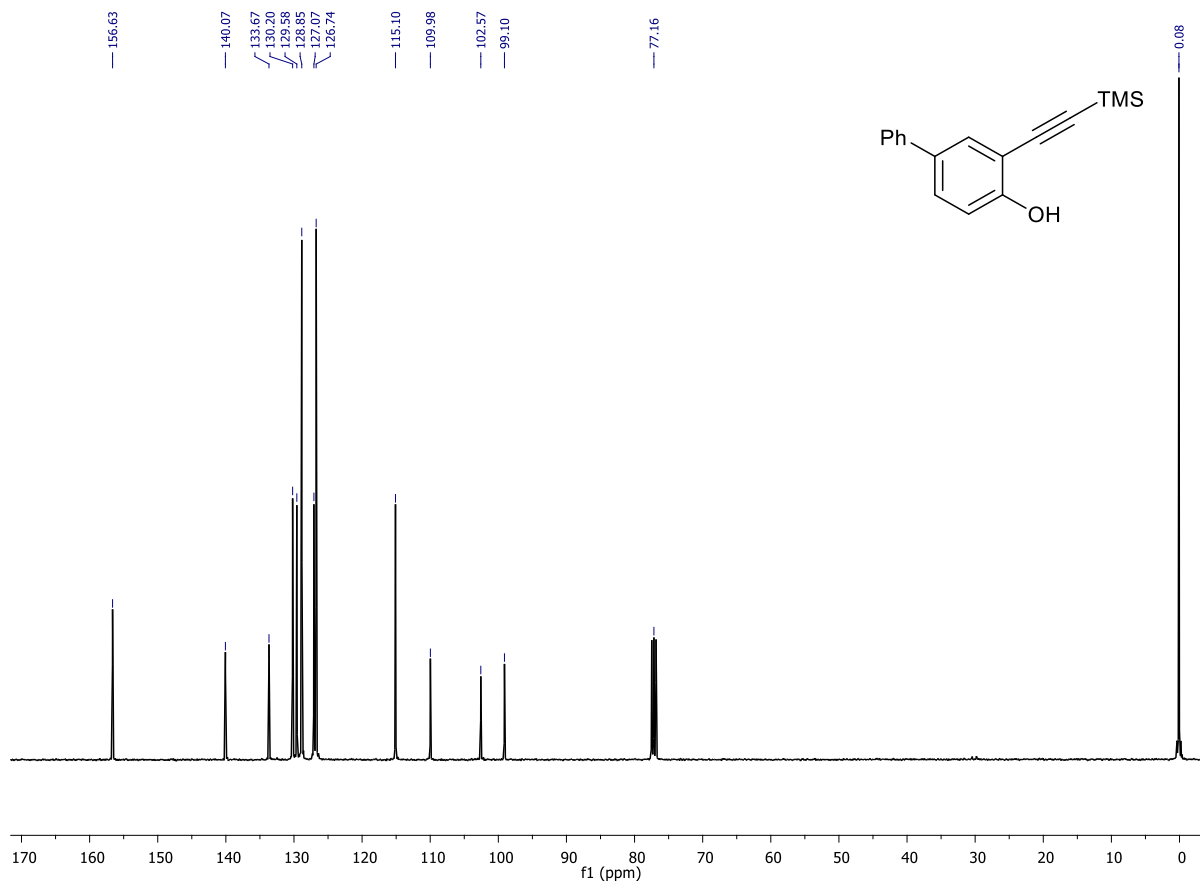

<sup>13</sup>C NMR of **A5** (101 MHz, CDCl<sub>3</sub>)

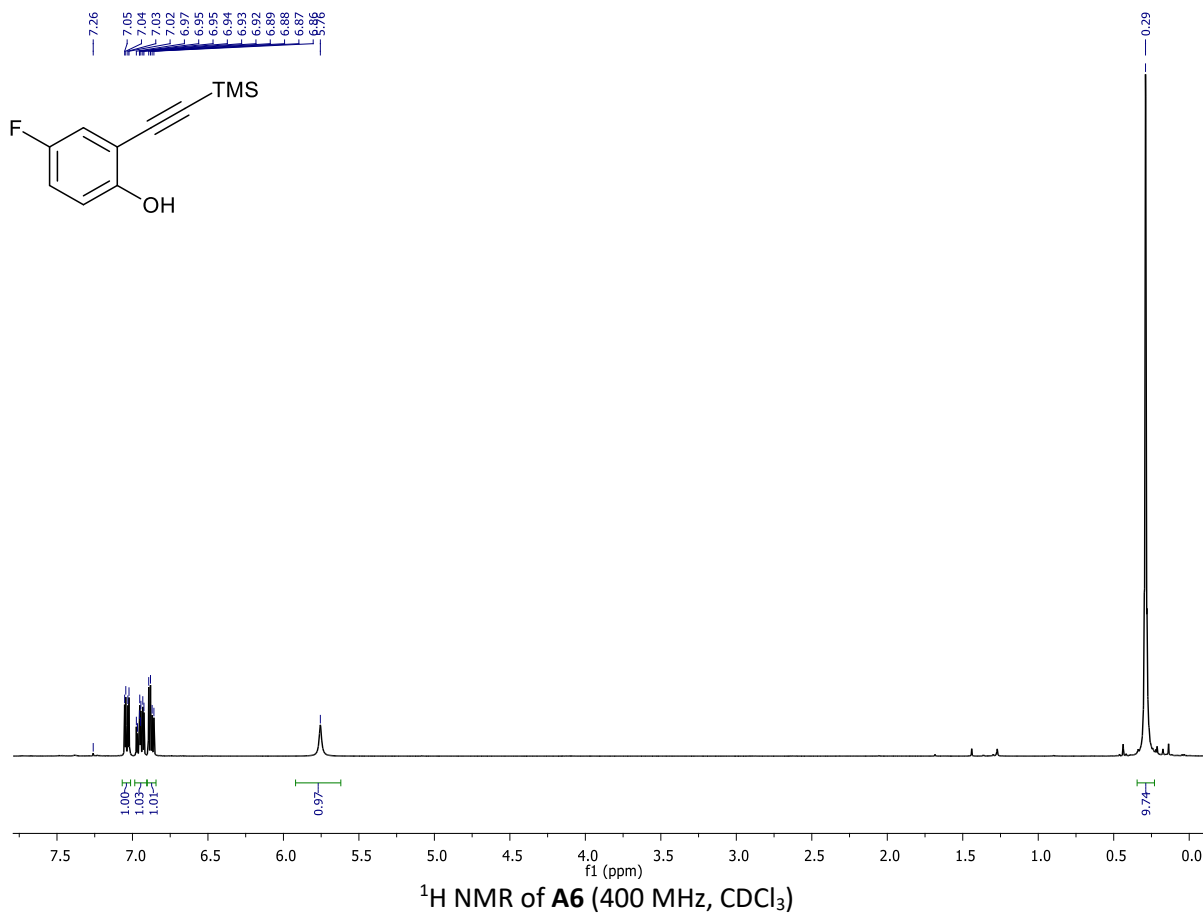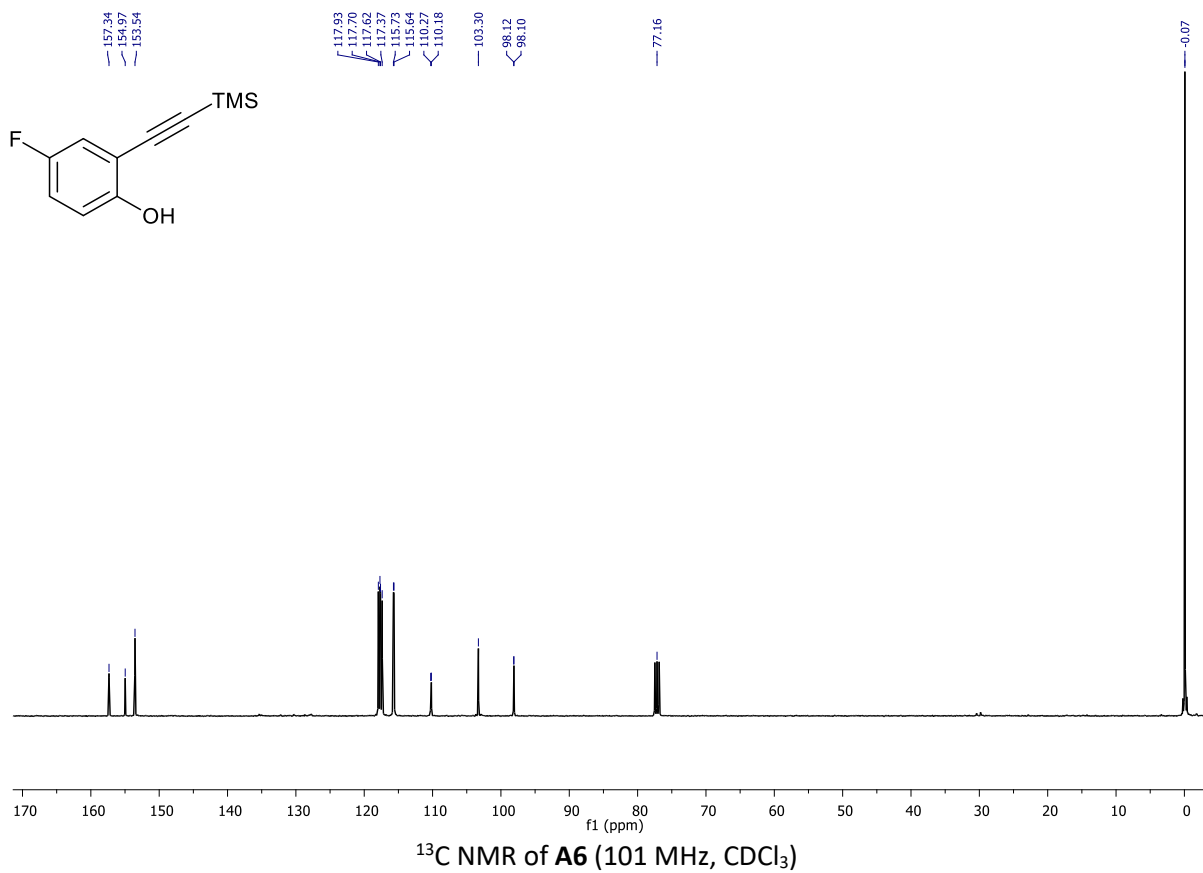

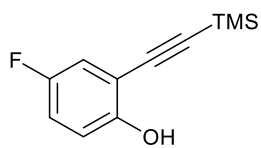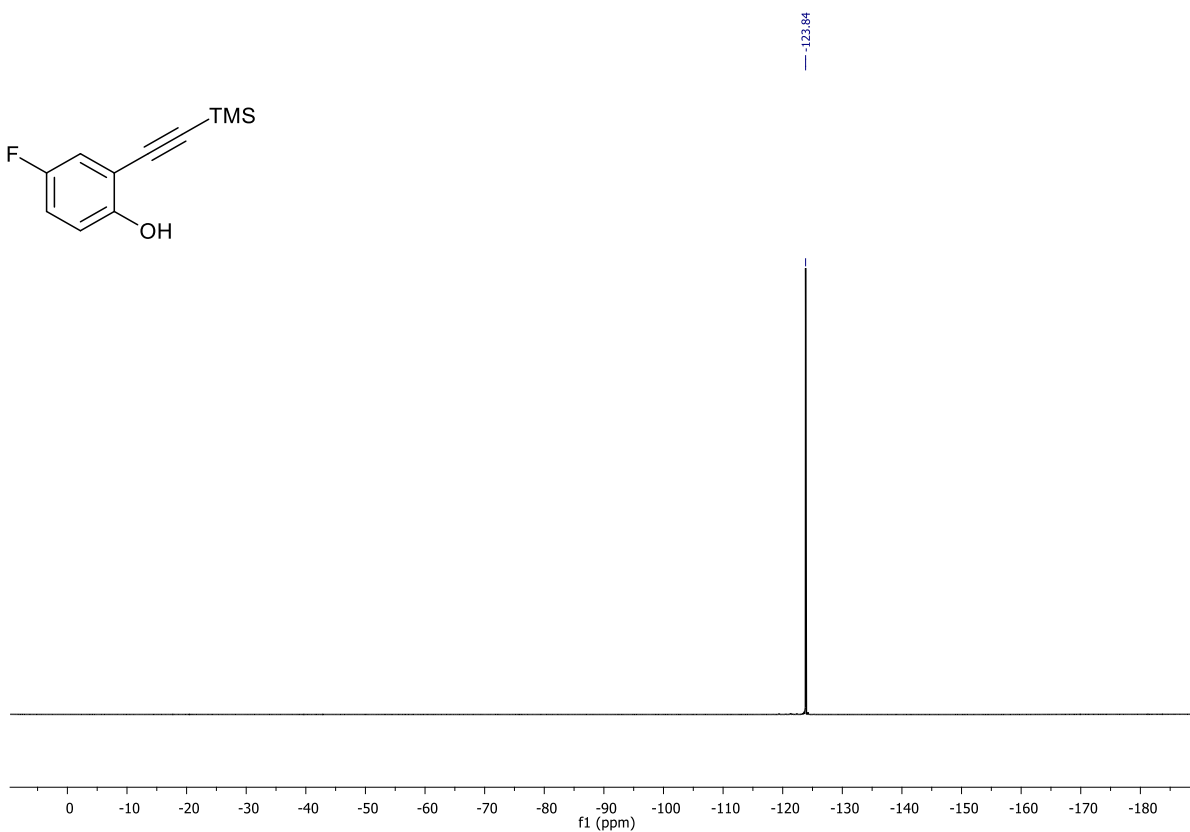

$^{19}\text{F}$  NMR of A6 (376.5 MHz,  $\text{CDCl}_3$ )

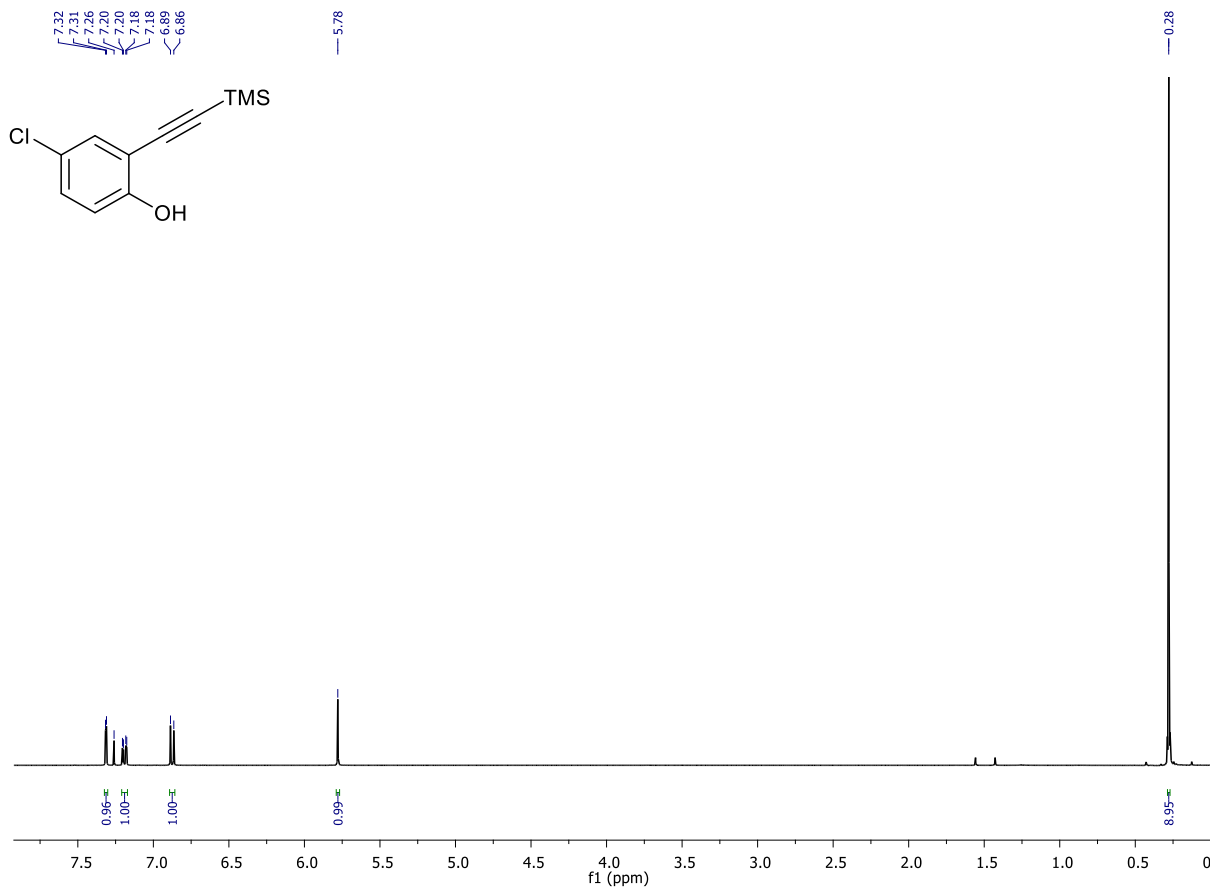

<sup>1</sup>H NMR of **A7** (400 MHz, CDCl<sub>3</sub>)

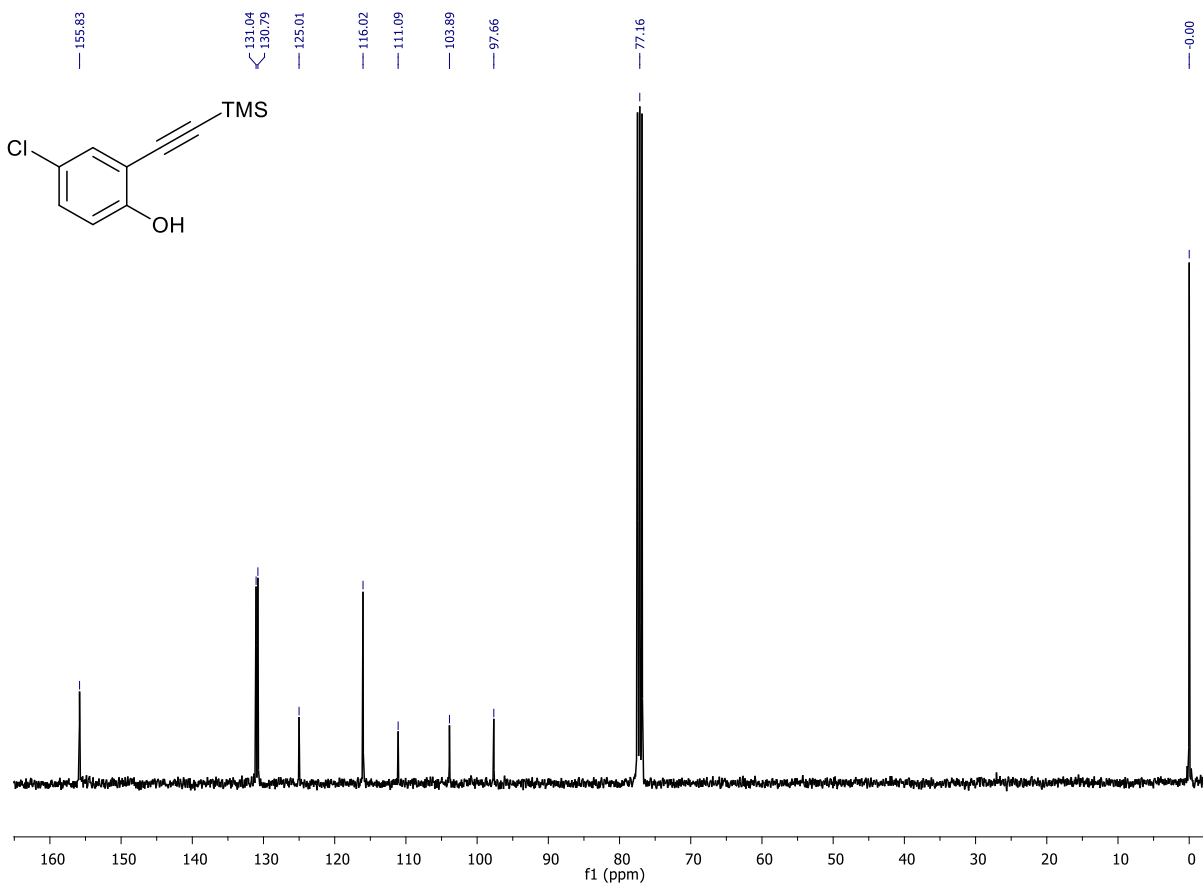

<sup>13</sup>C NMR of **A7** (101 MHz, CDCl<sub>3</sub>)



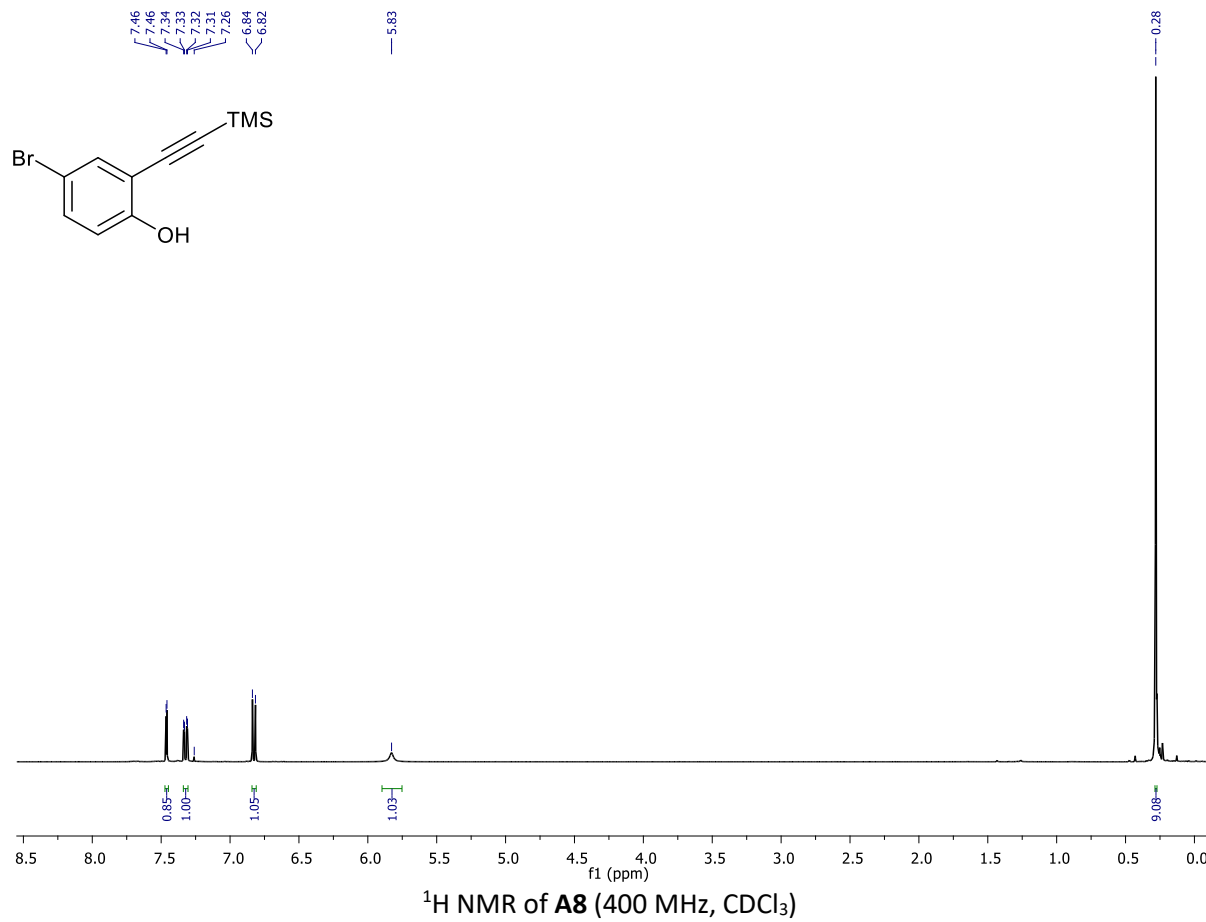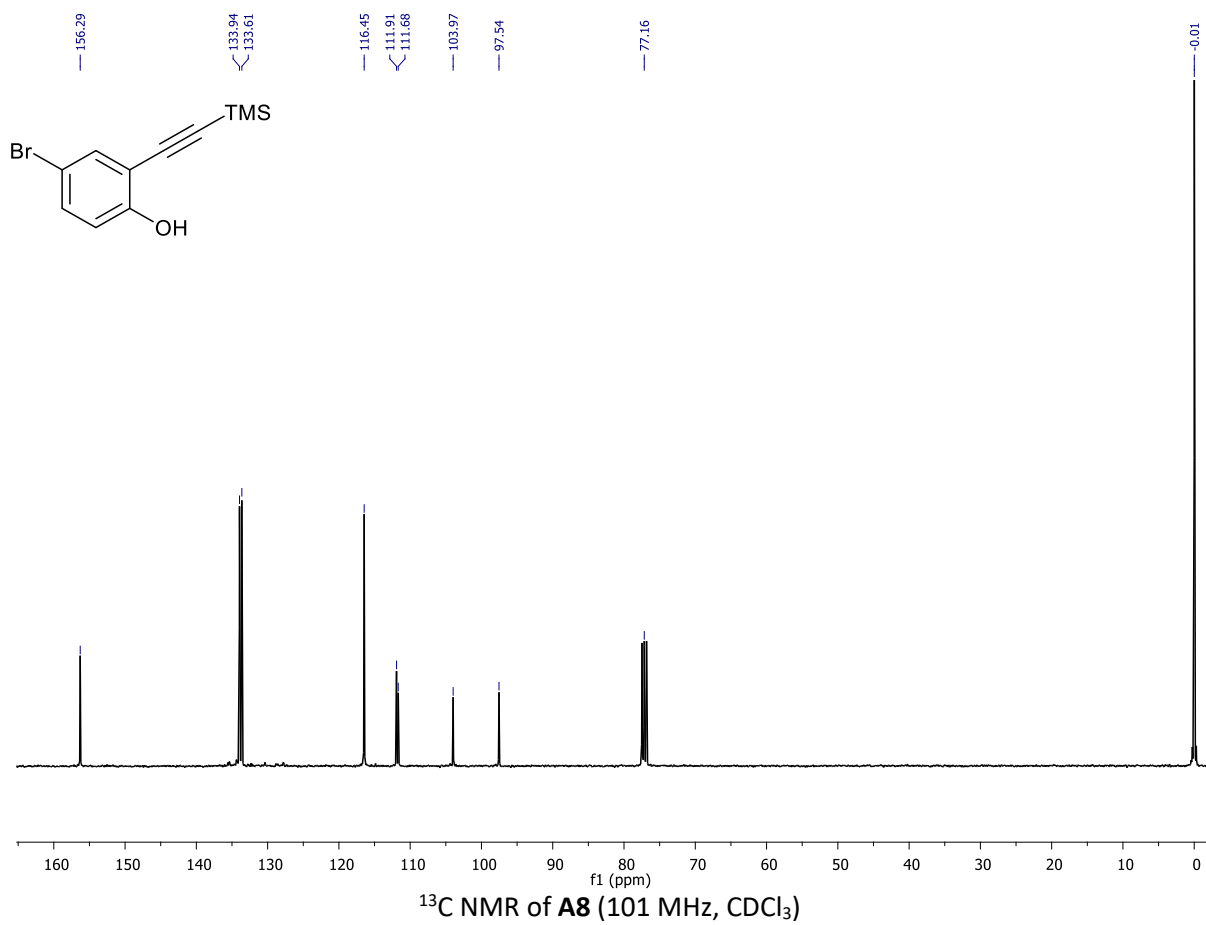

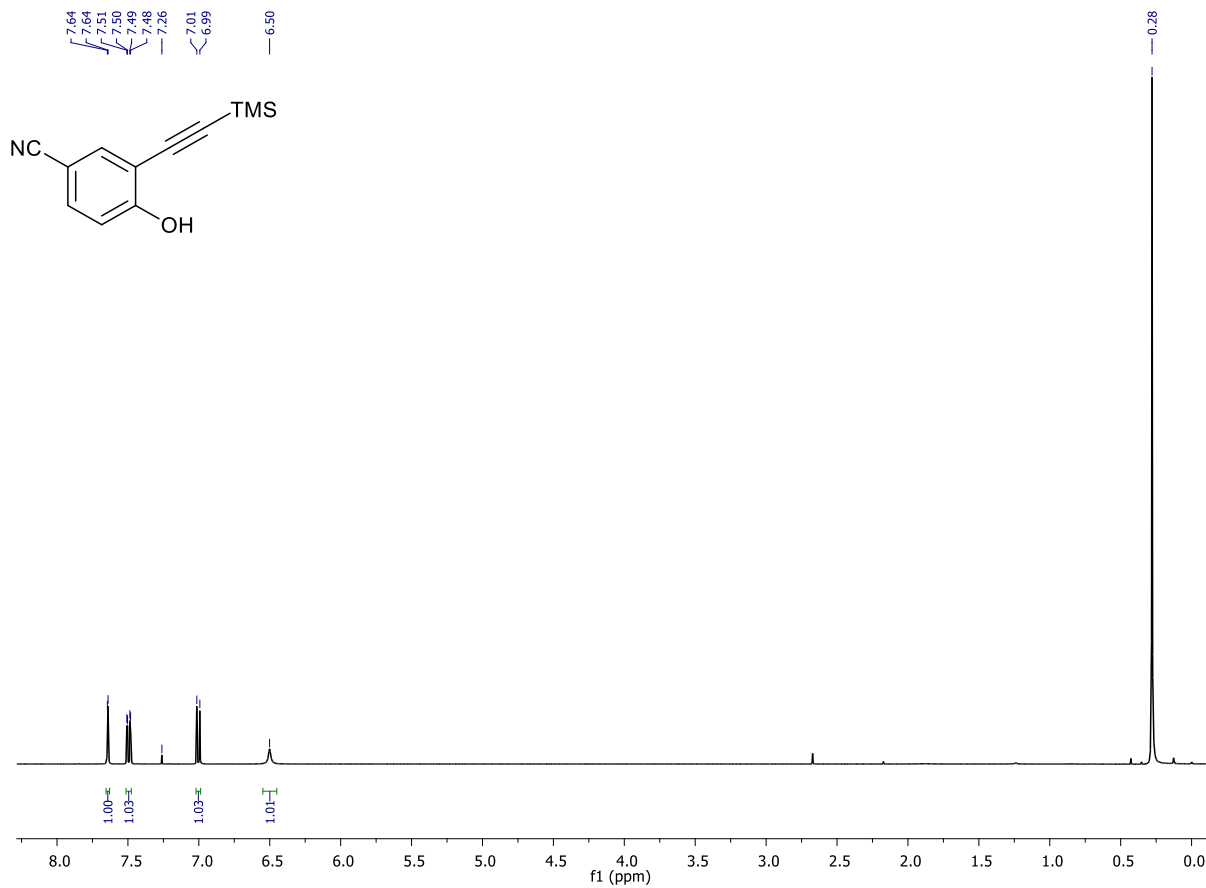

<sup>1</sup>H NMR of **A9** (400 MHz, CDCl<sub>3</sub>)

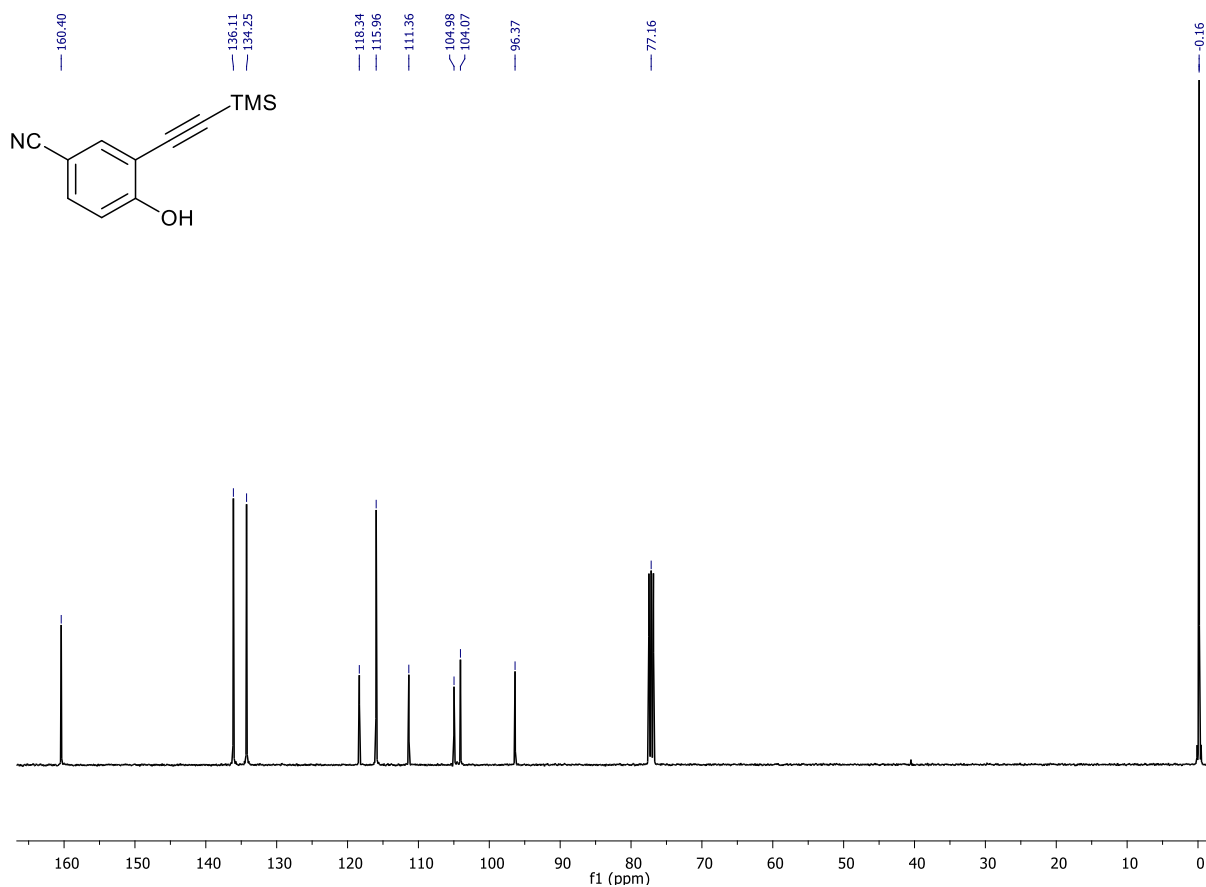

<sup>13</sup>C NMR of **A9** (101 MHz, CDCl<sub>3</sub>)

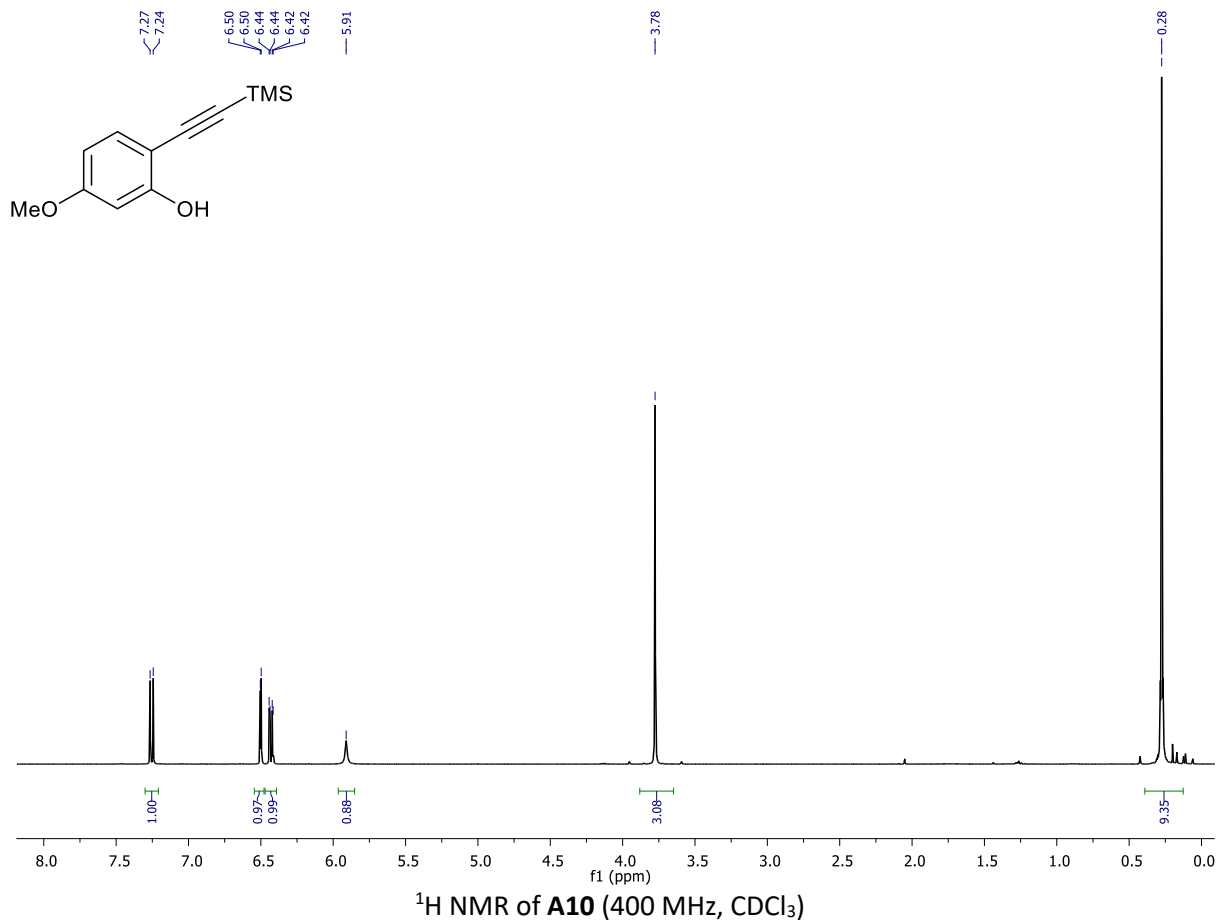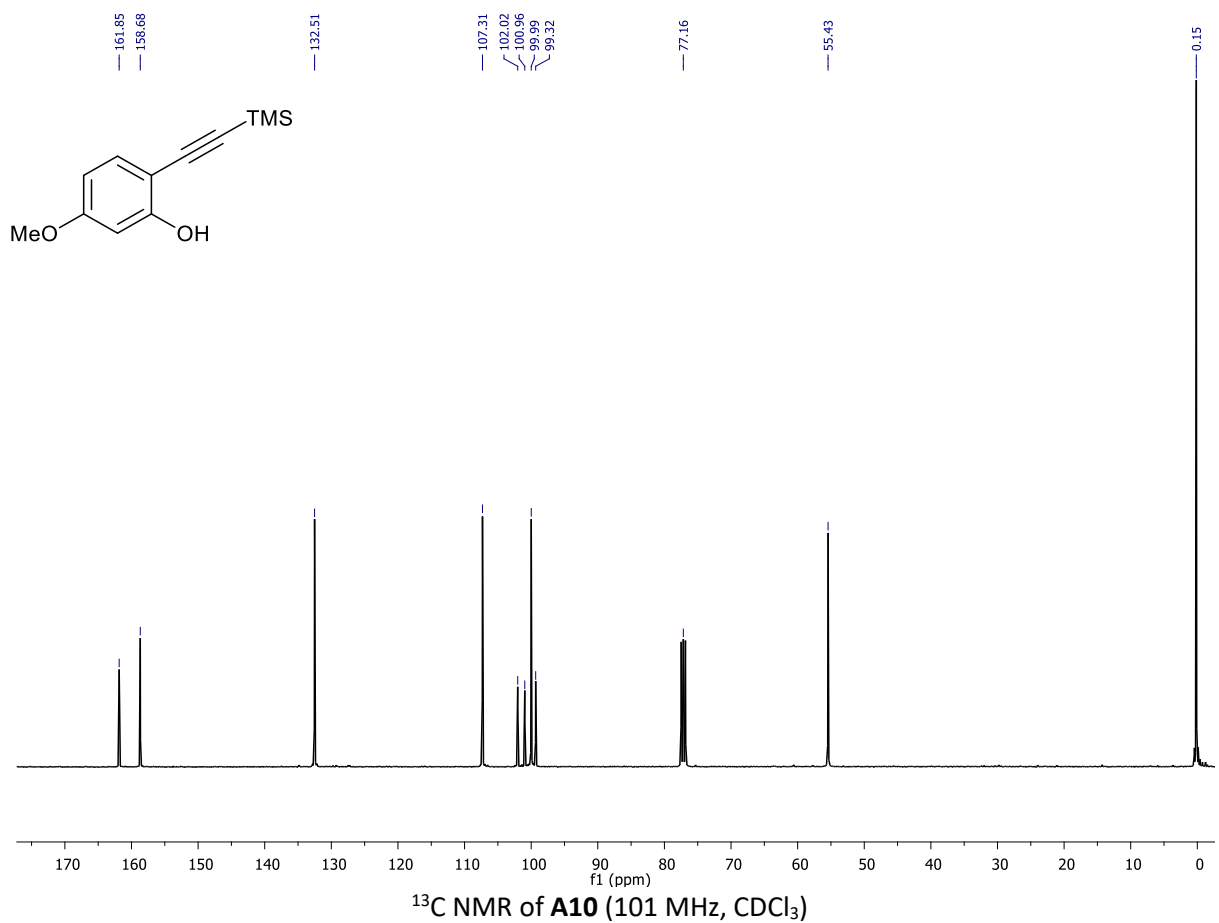

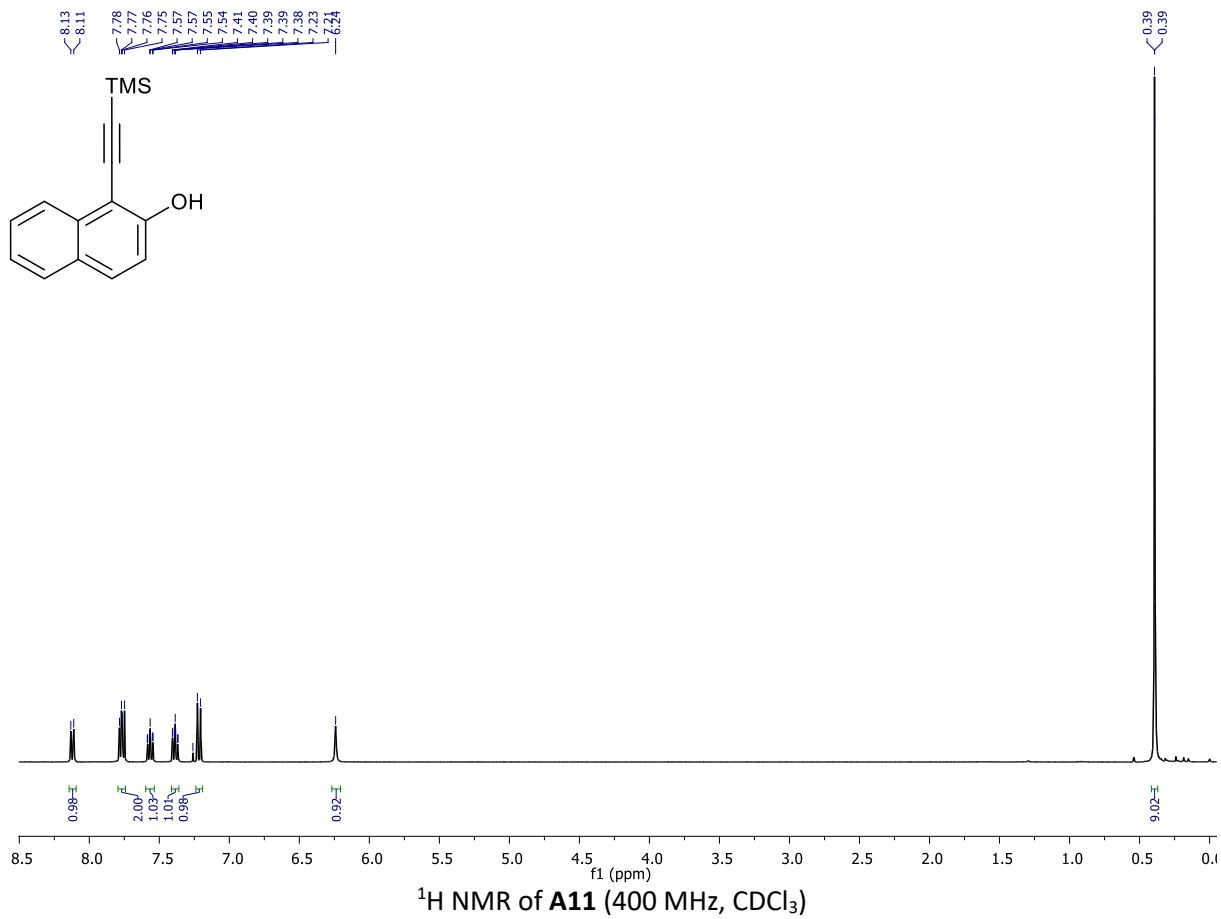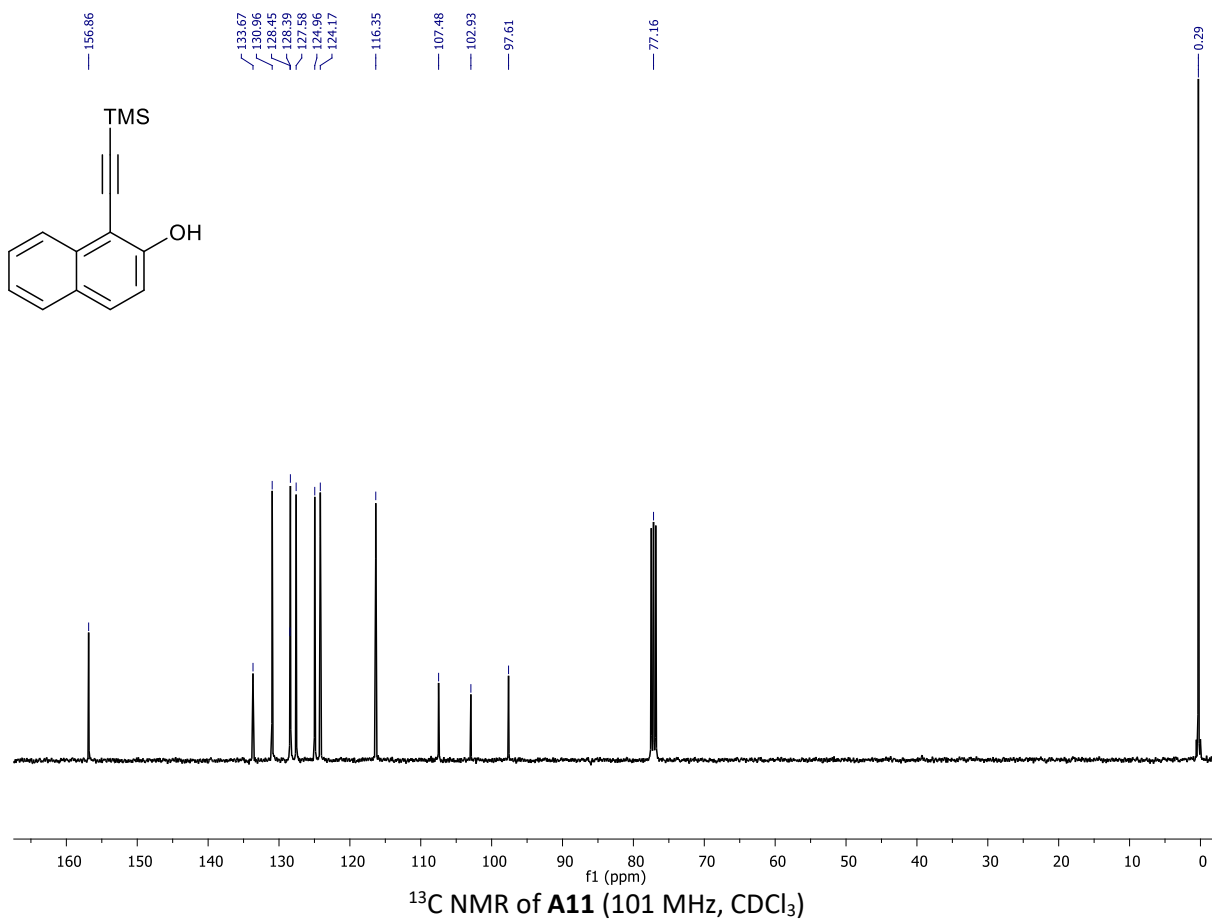

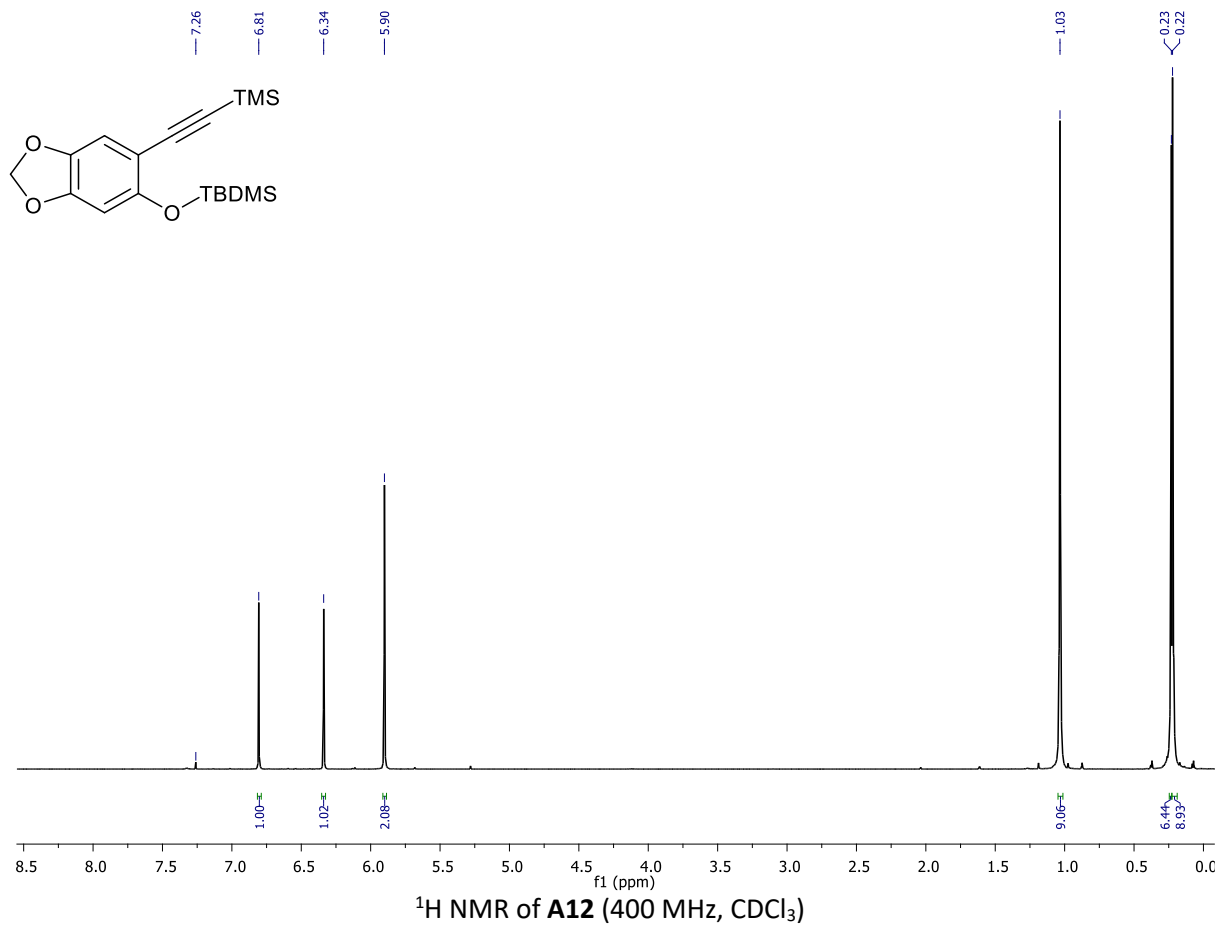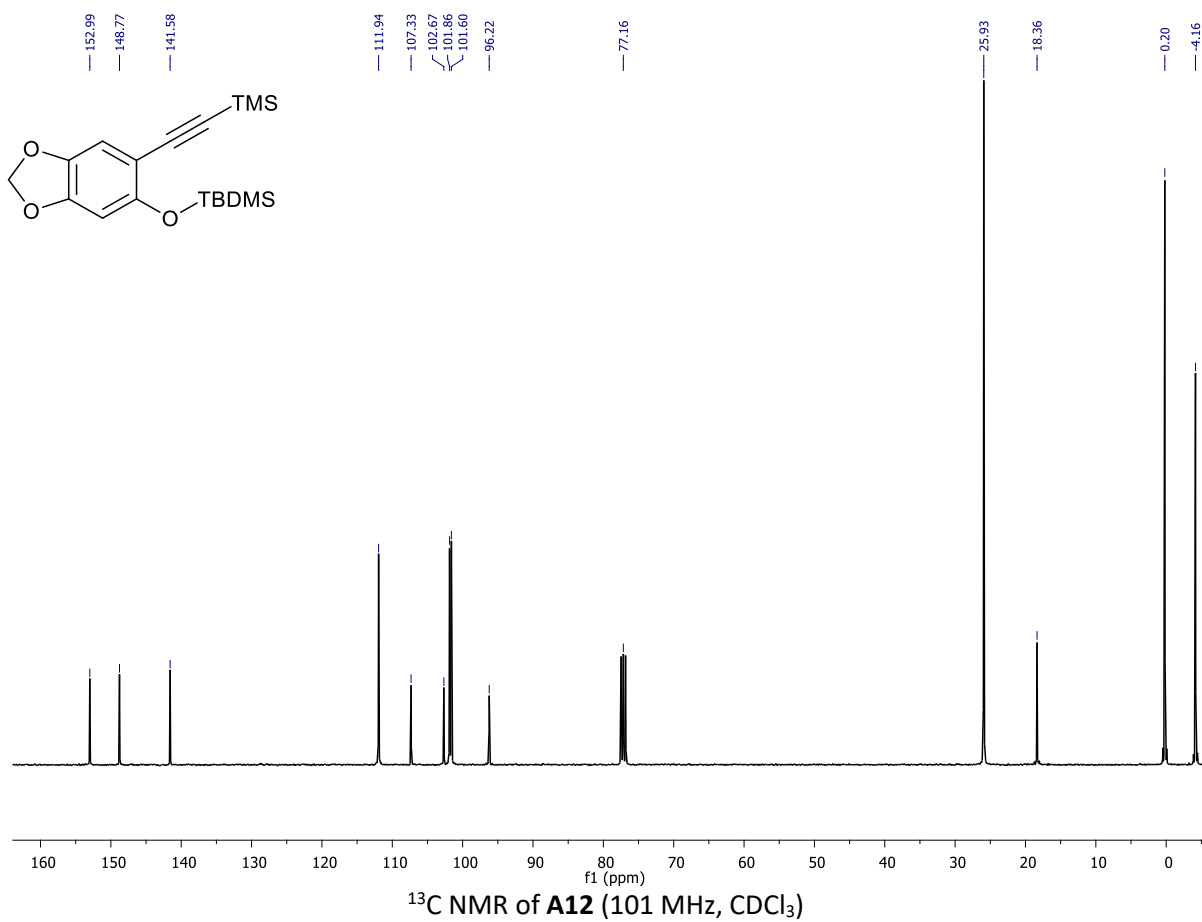

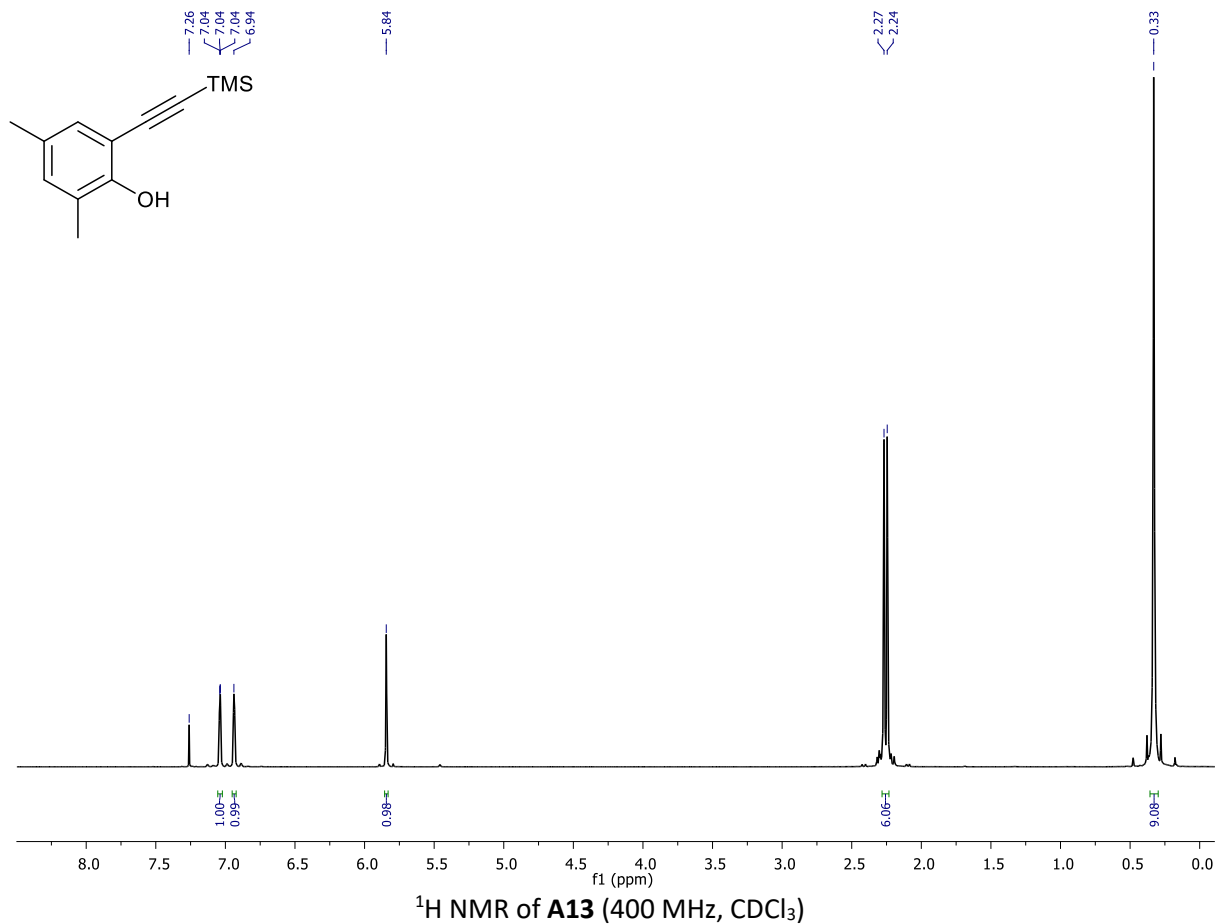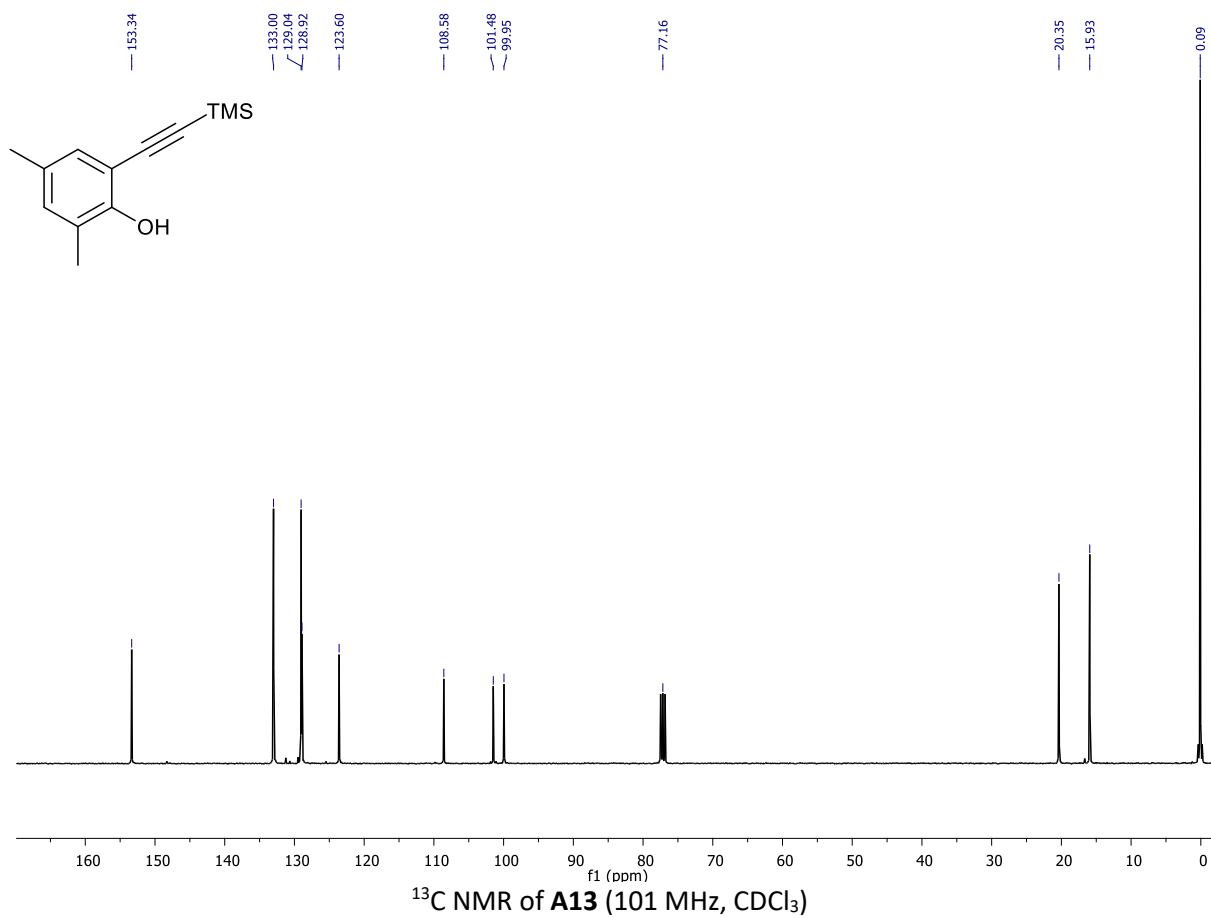

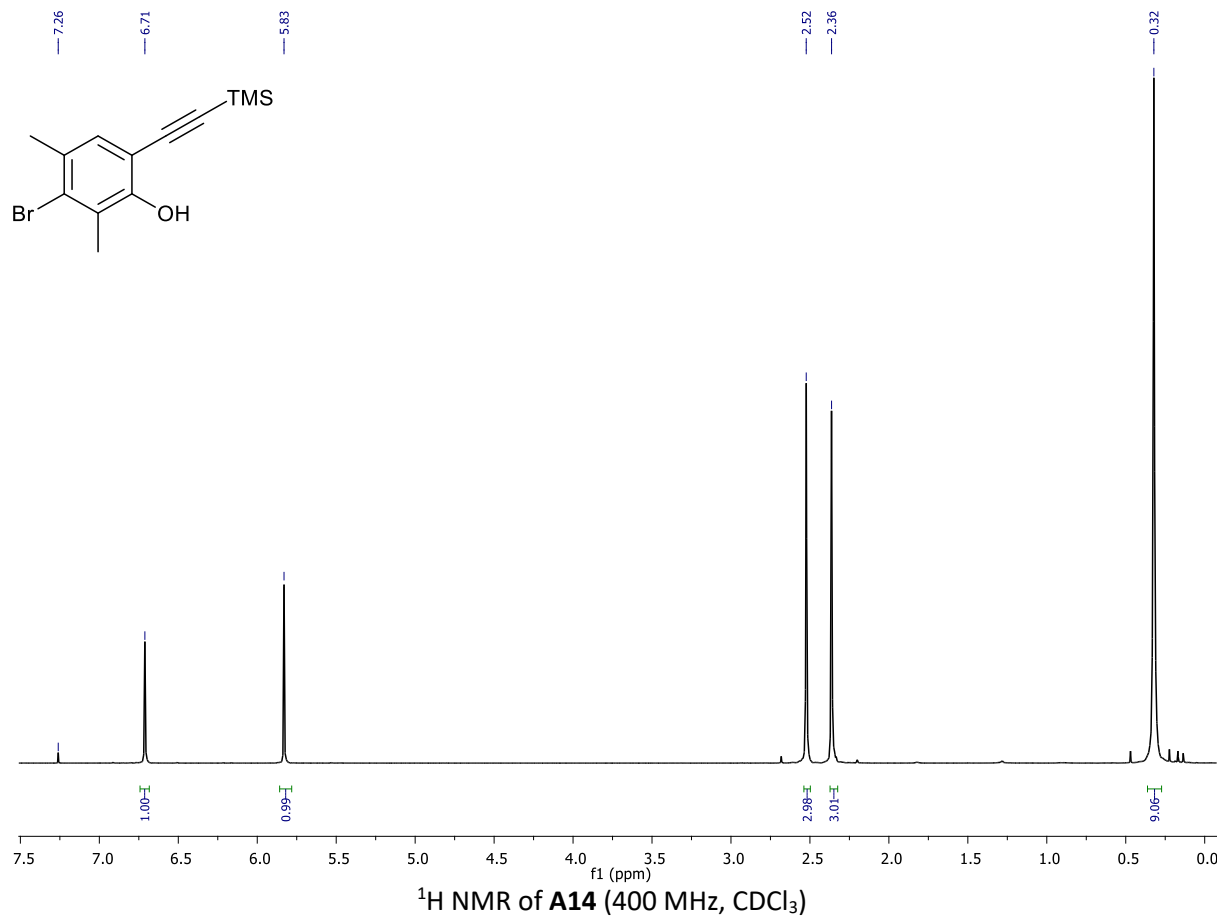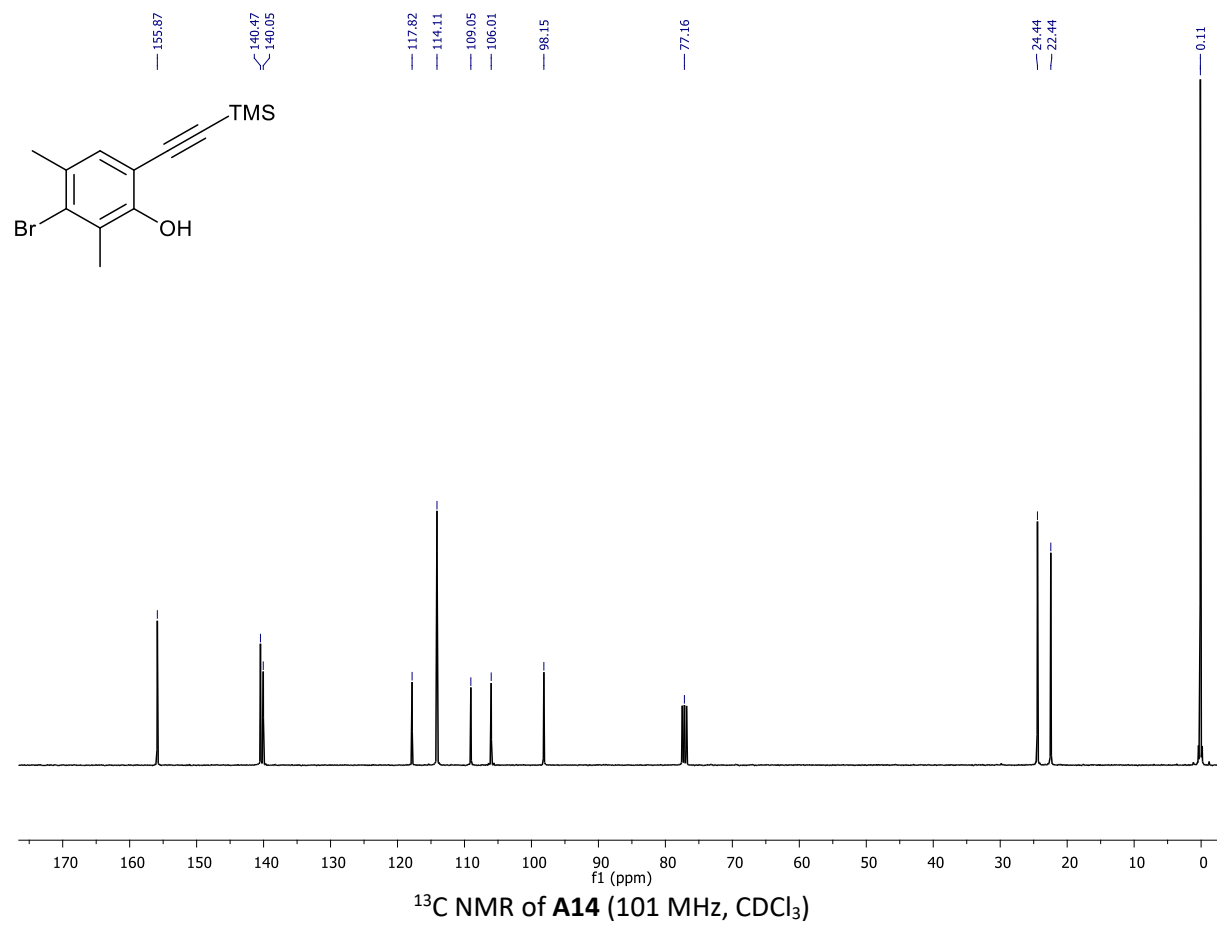

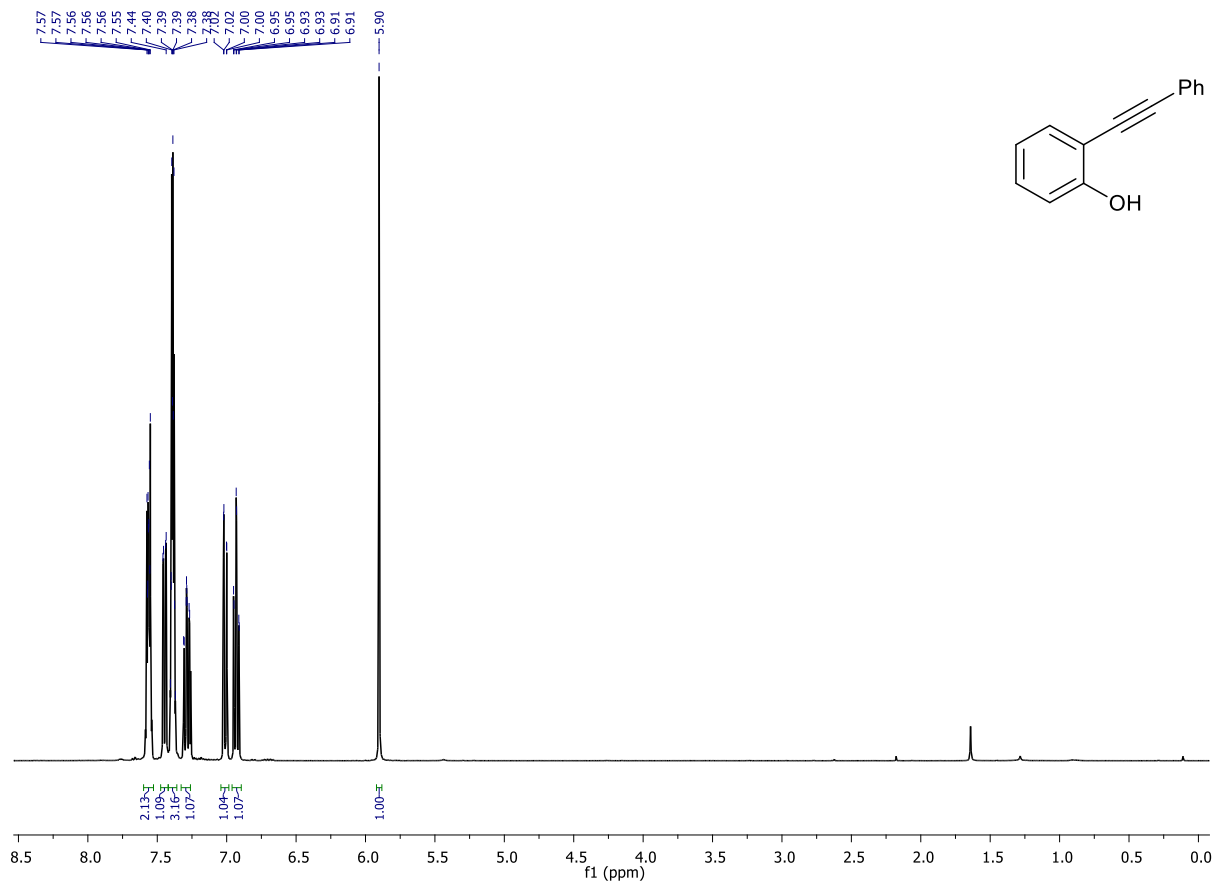

<sup>1</sup>H NMR of **A15** (400 MHz, CDCl<sub>3</sub>)

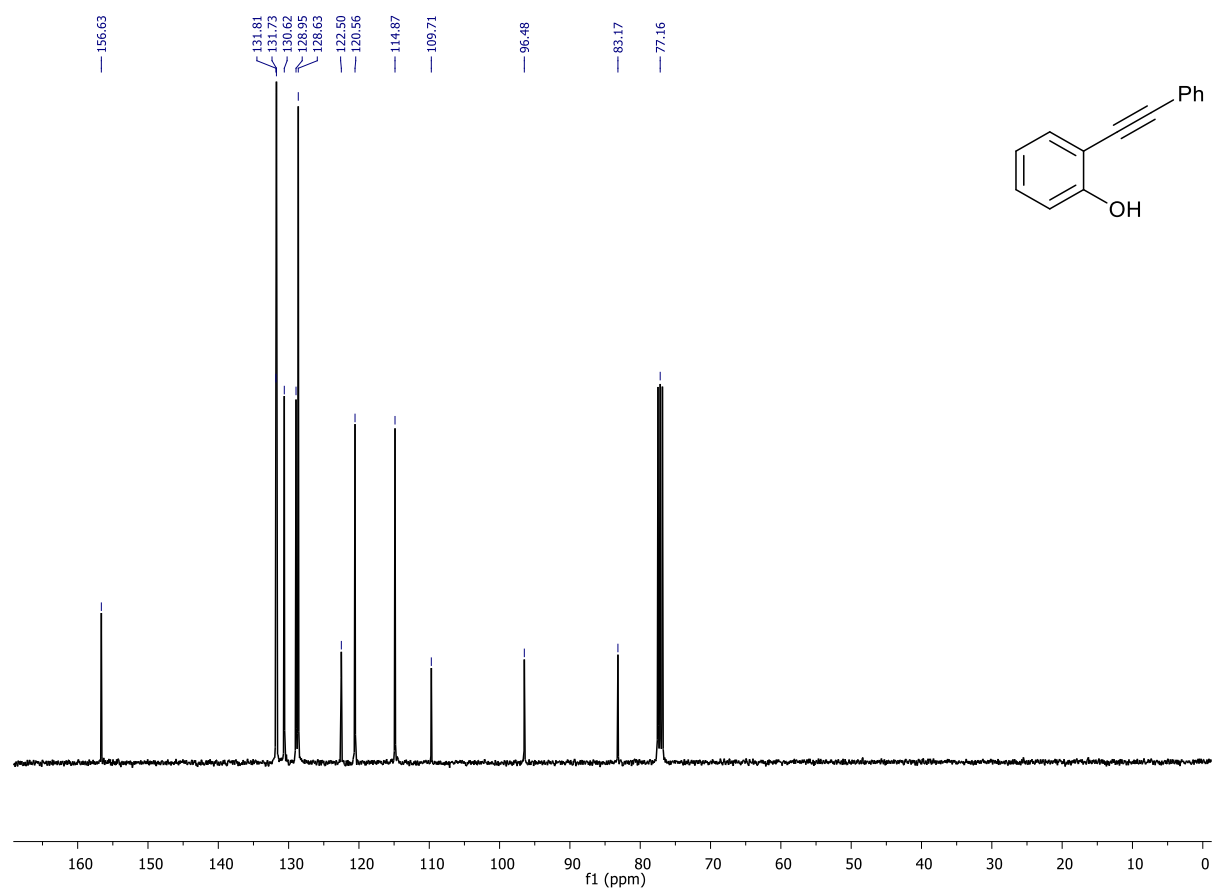

<sup>13</sup>C NMR of **A15** (101 MHz, CDCl<sub>3</sub>)



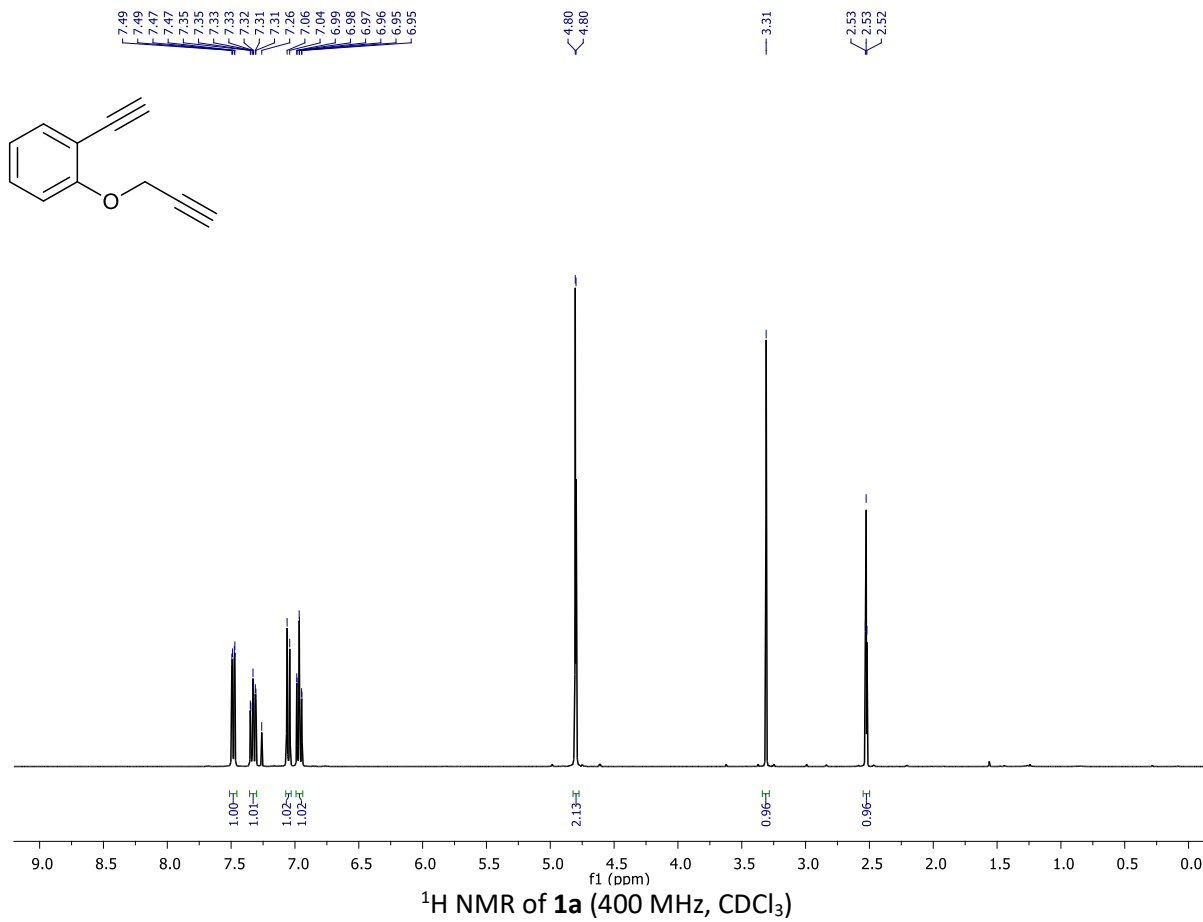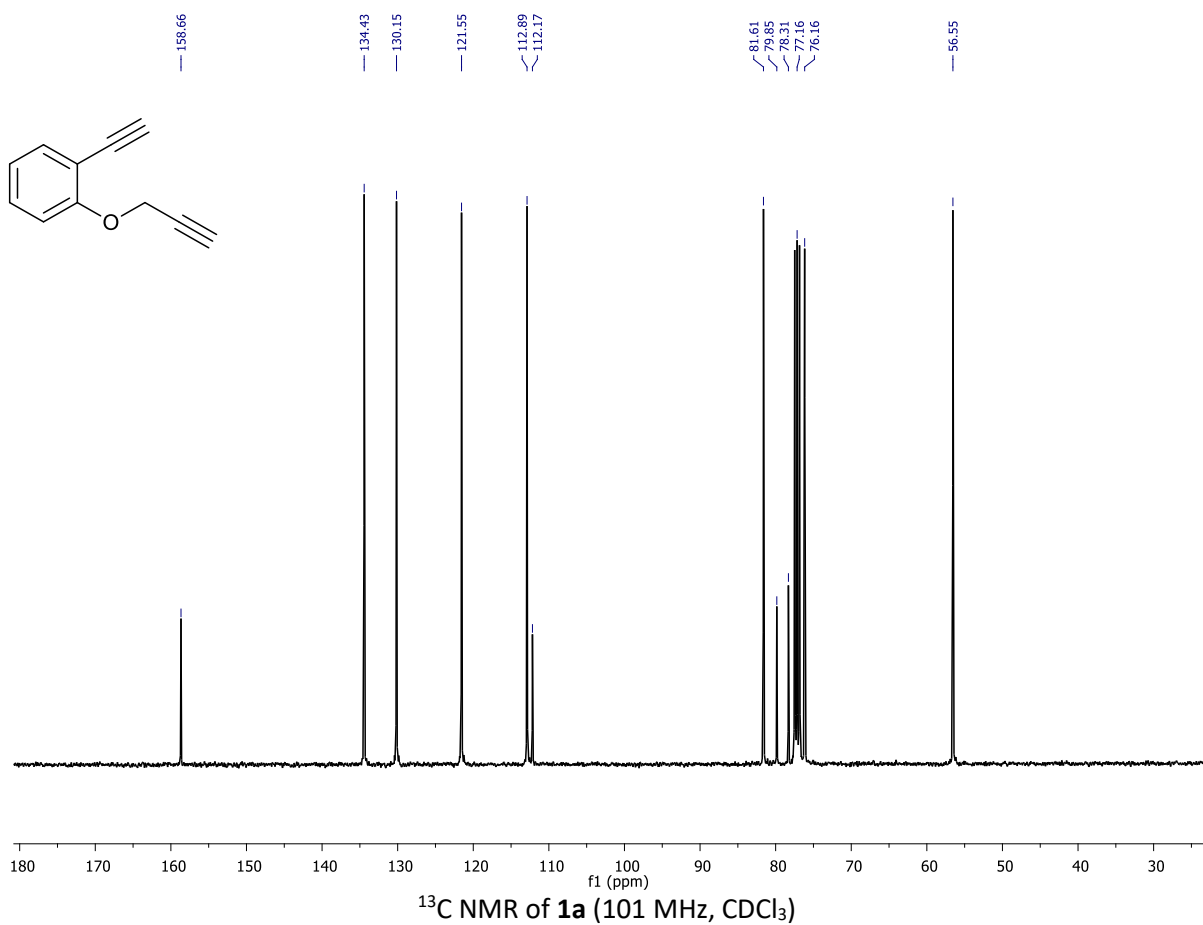

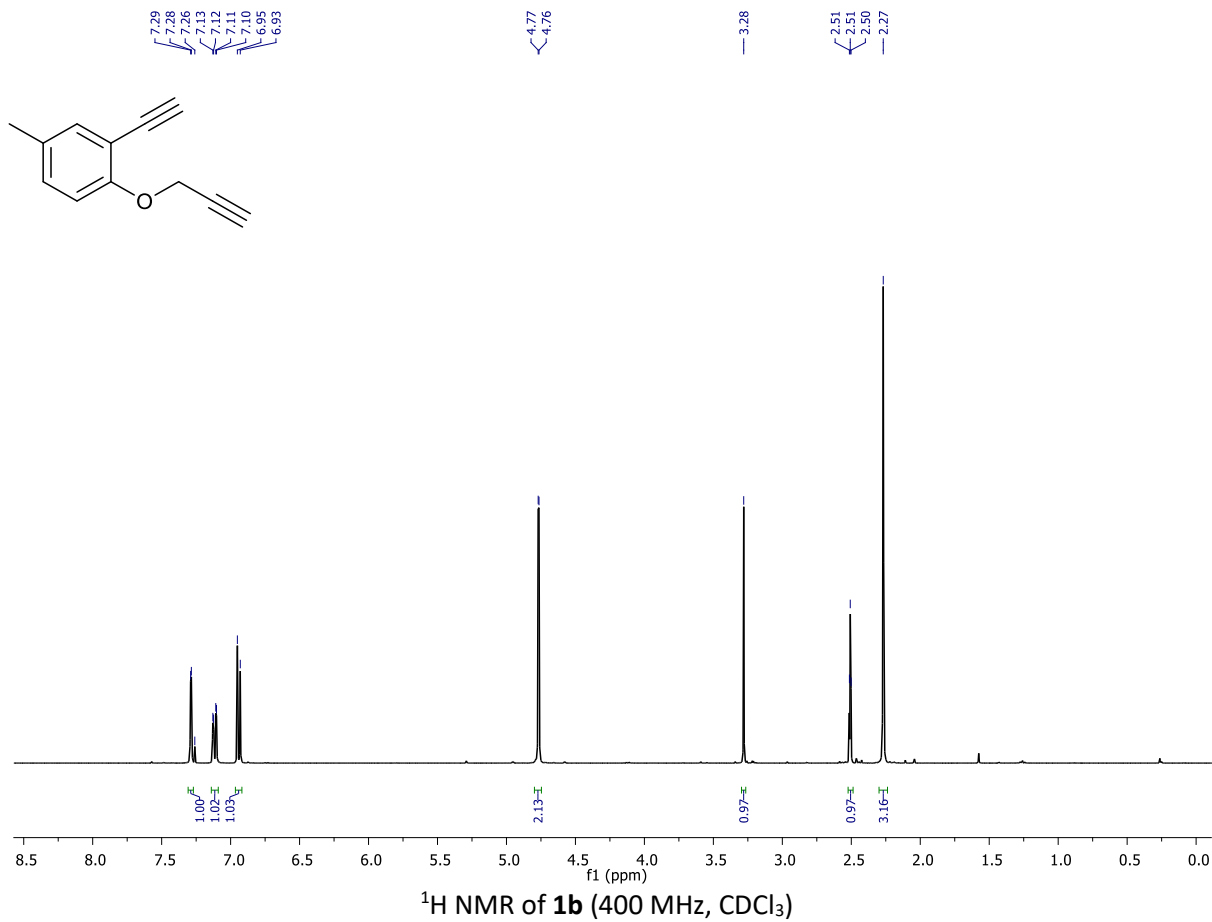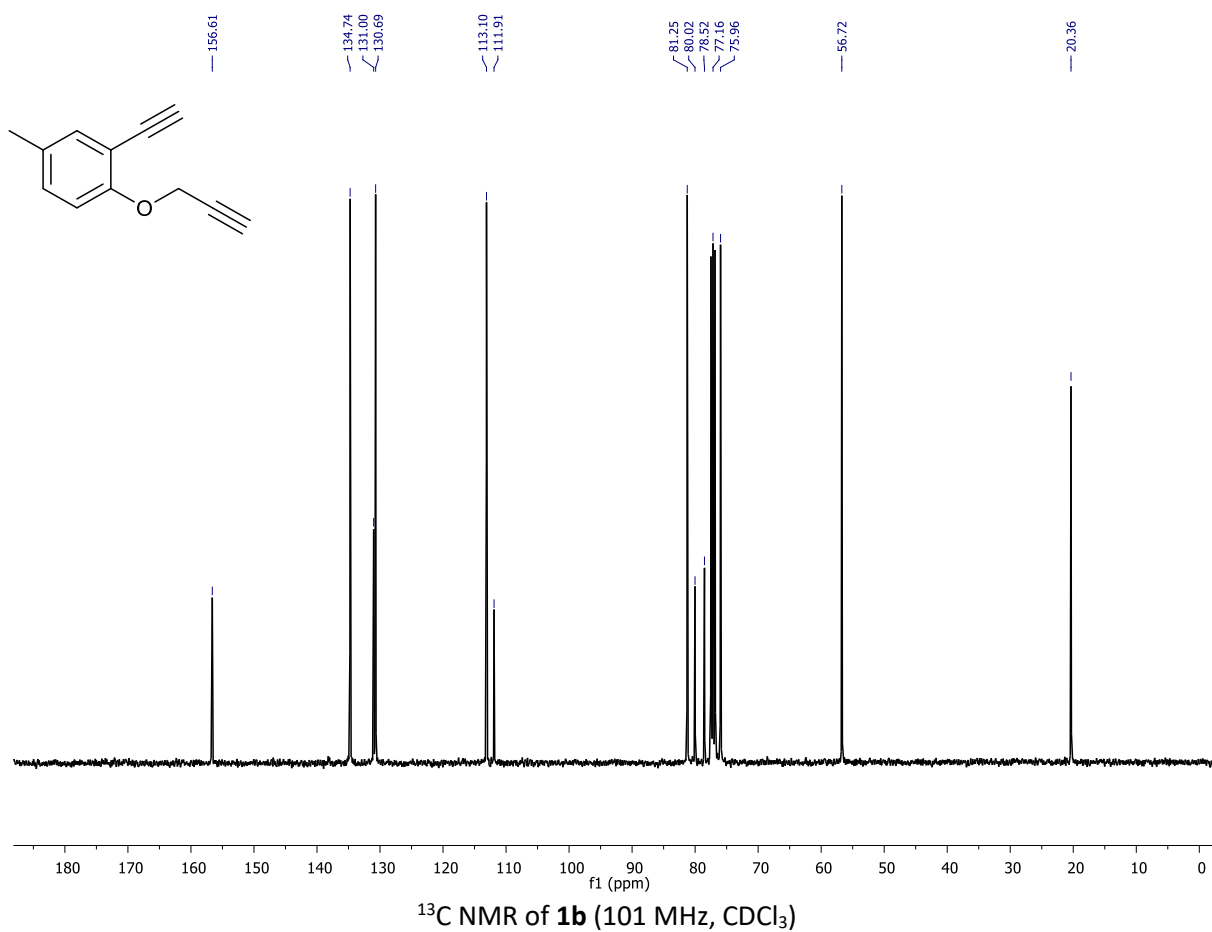

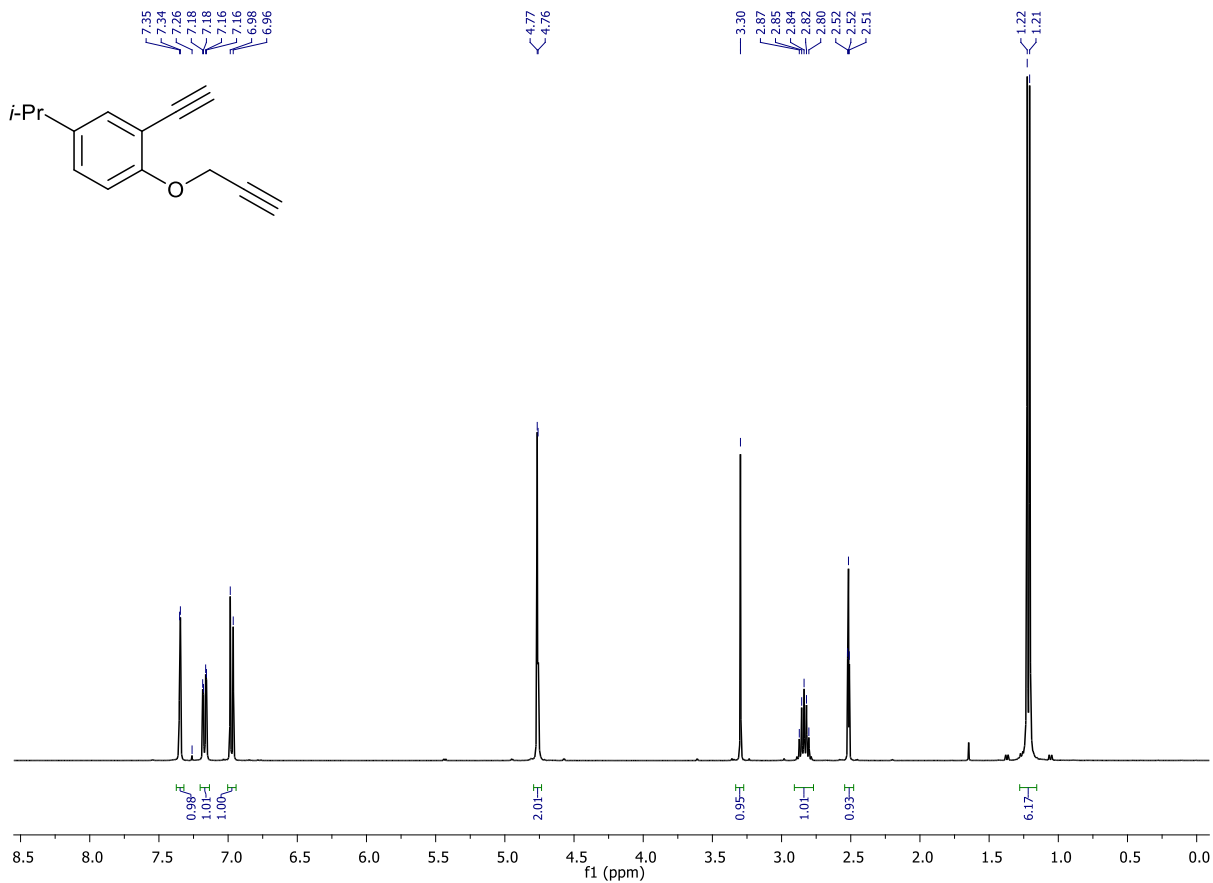

<sup>1</sup>H NMR of **1c** (400 MHz, CDCl<sub>3</sub>)

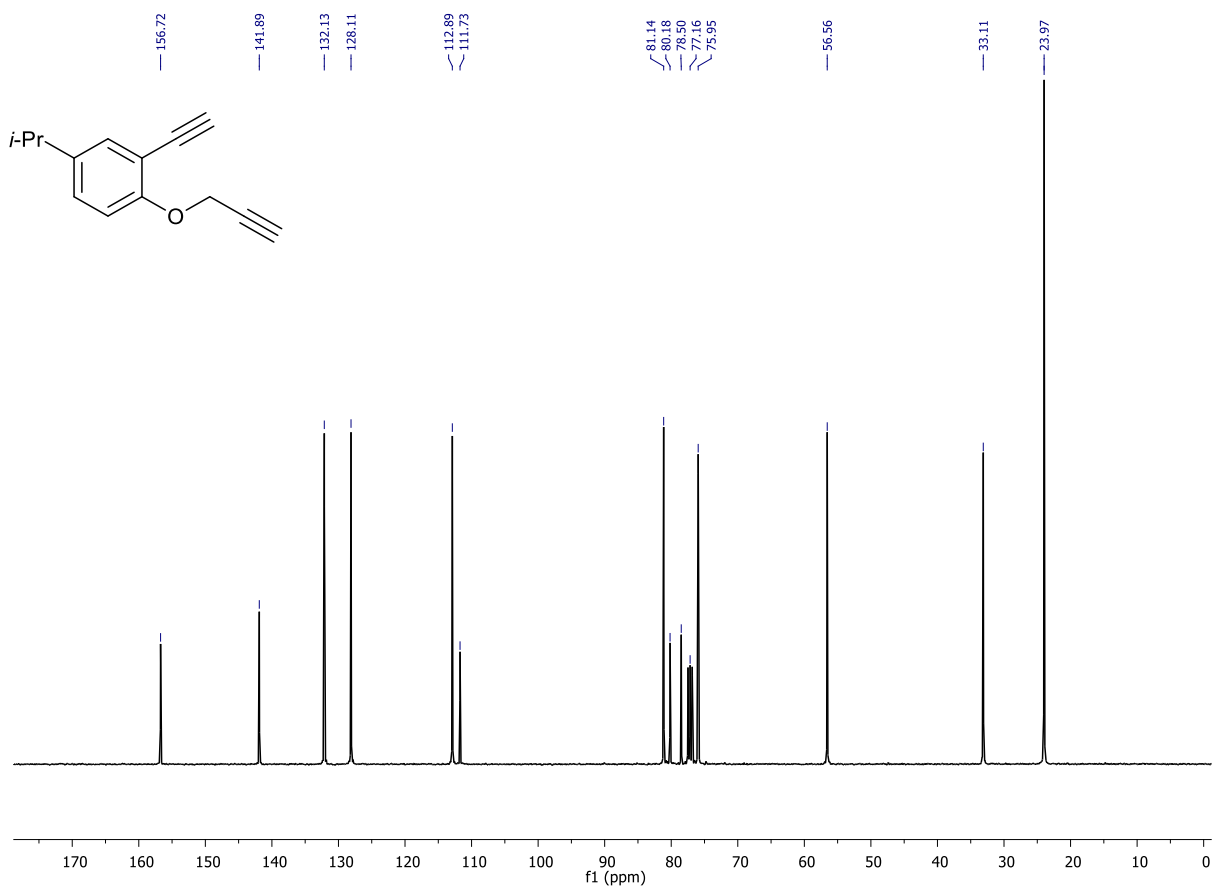

<sup>13</sup>C NMR of **1c** (101 MHz, CDCl<sub>3</sub>)

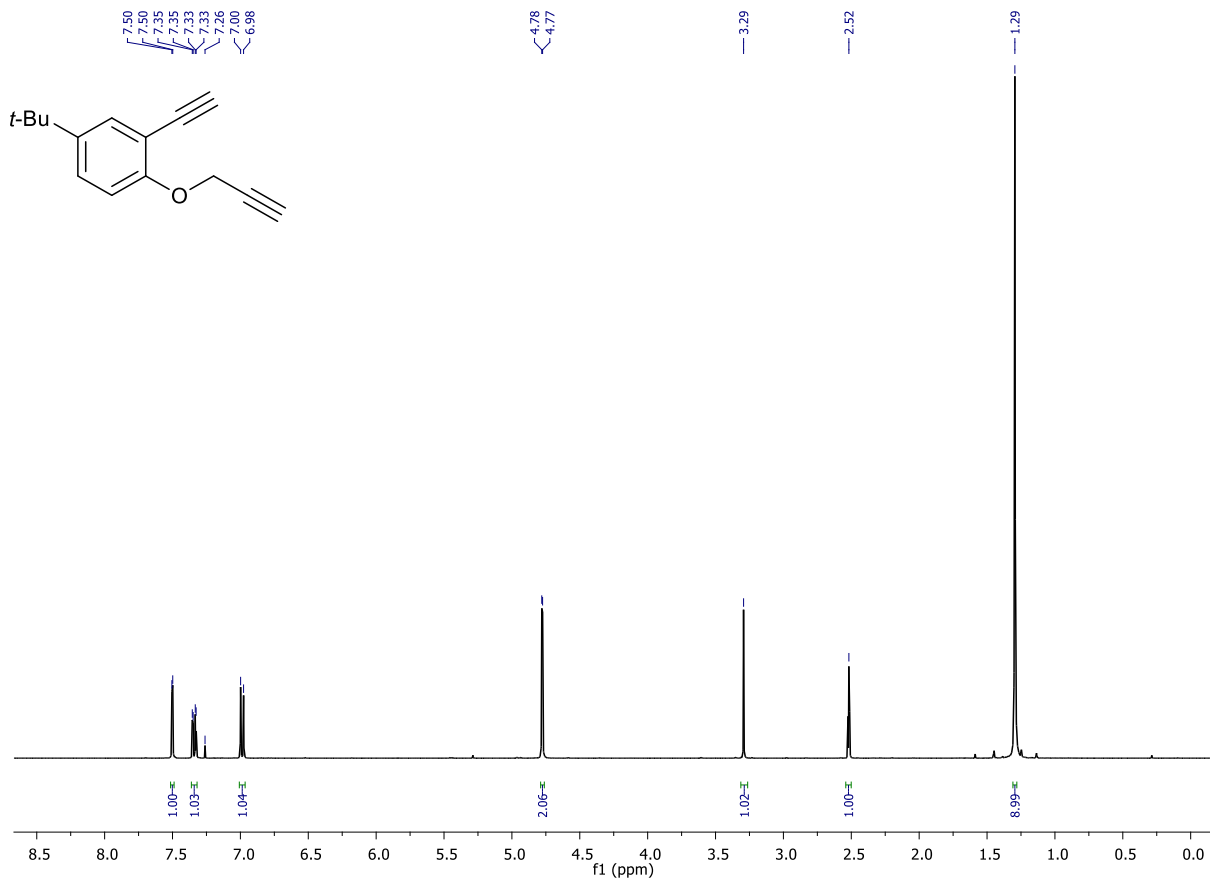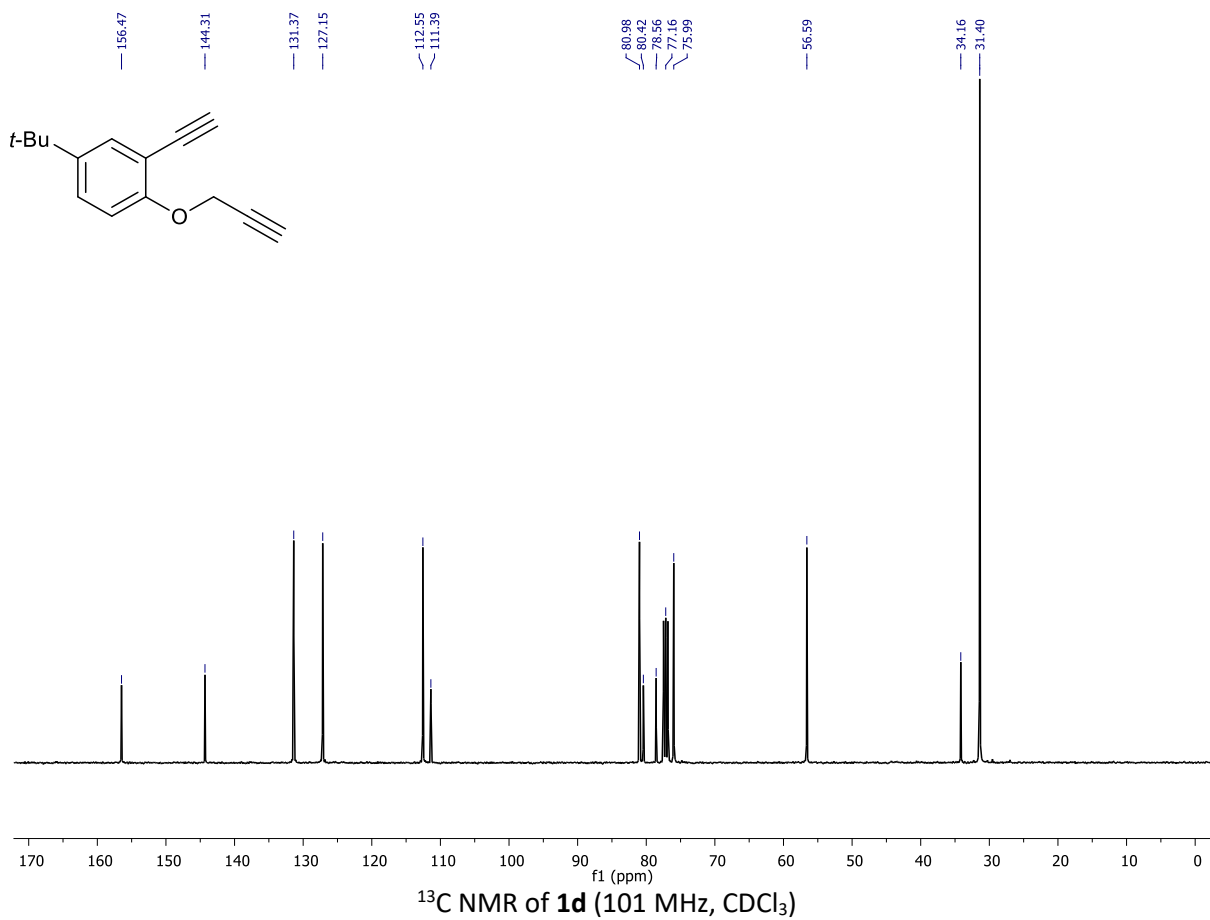

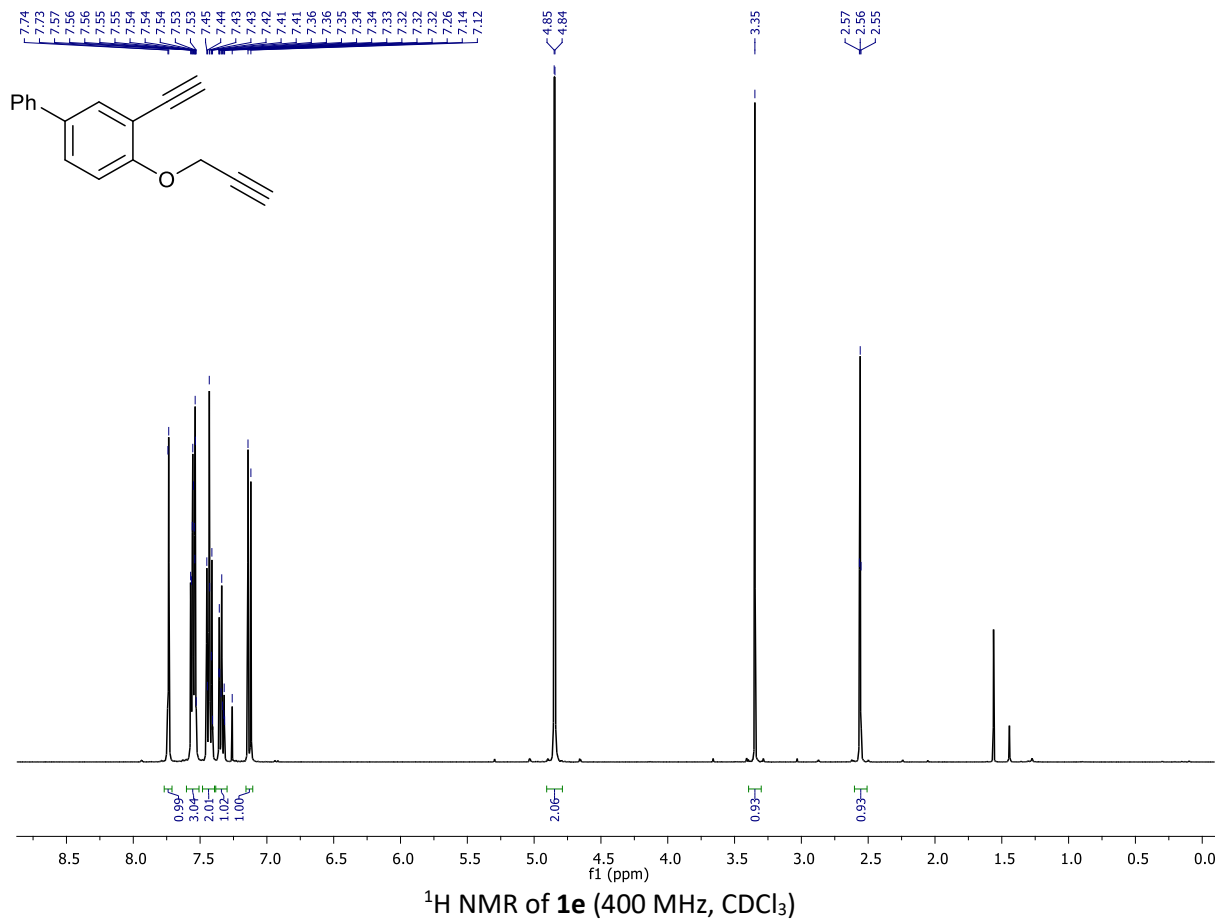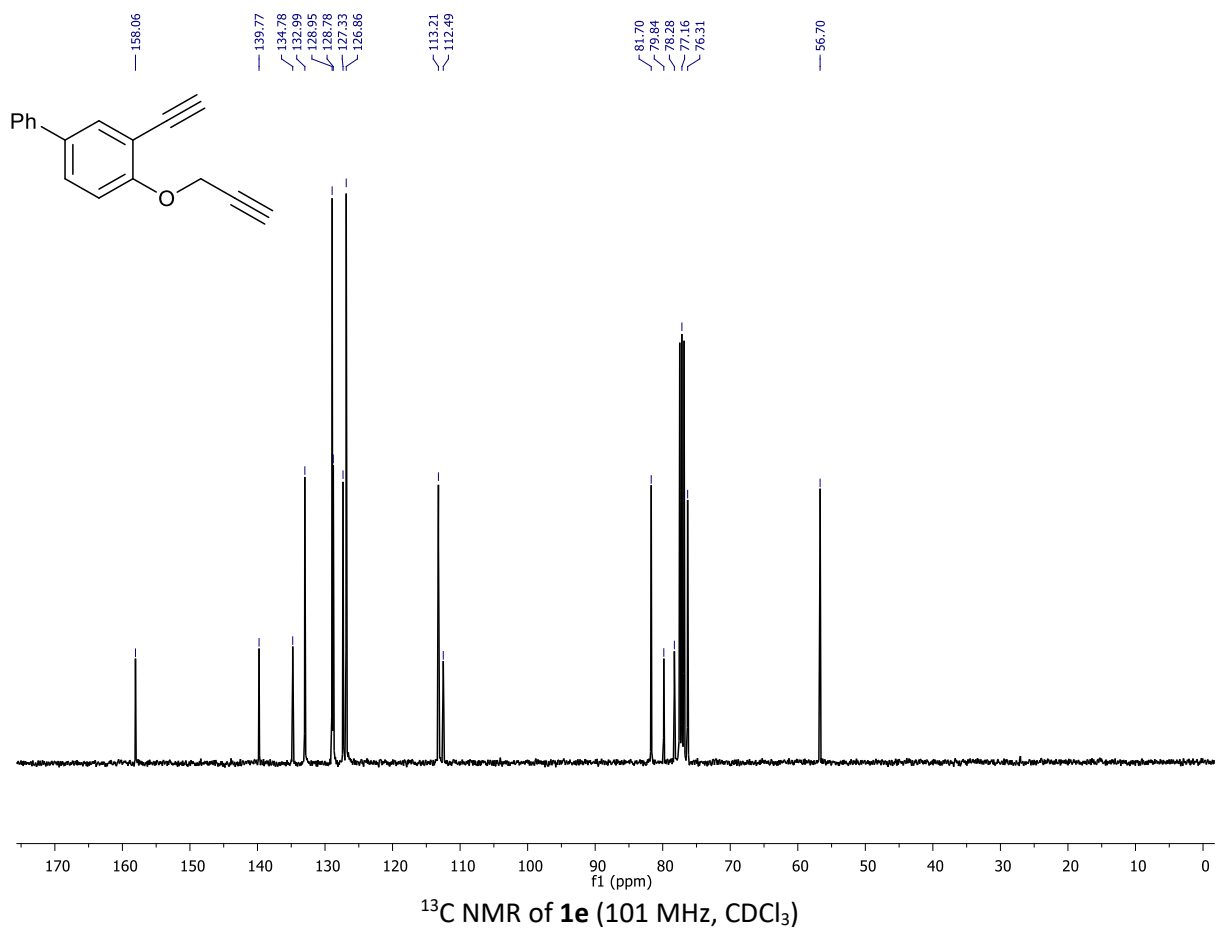

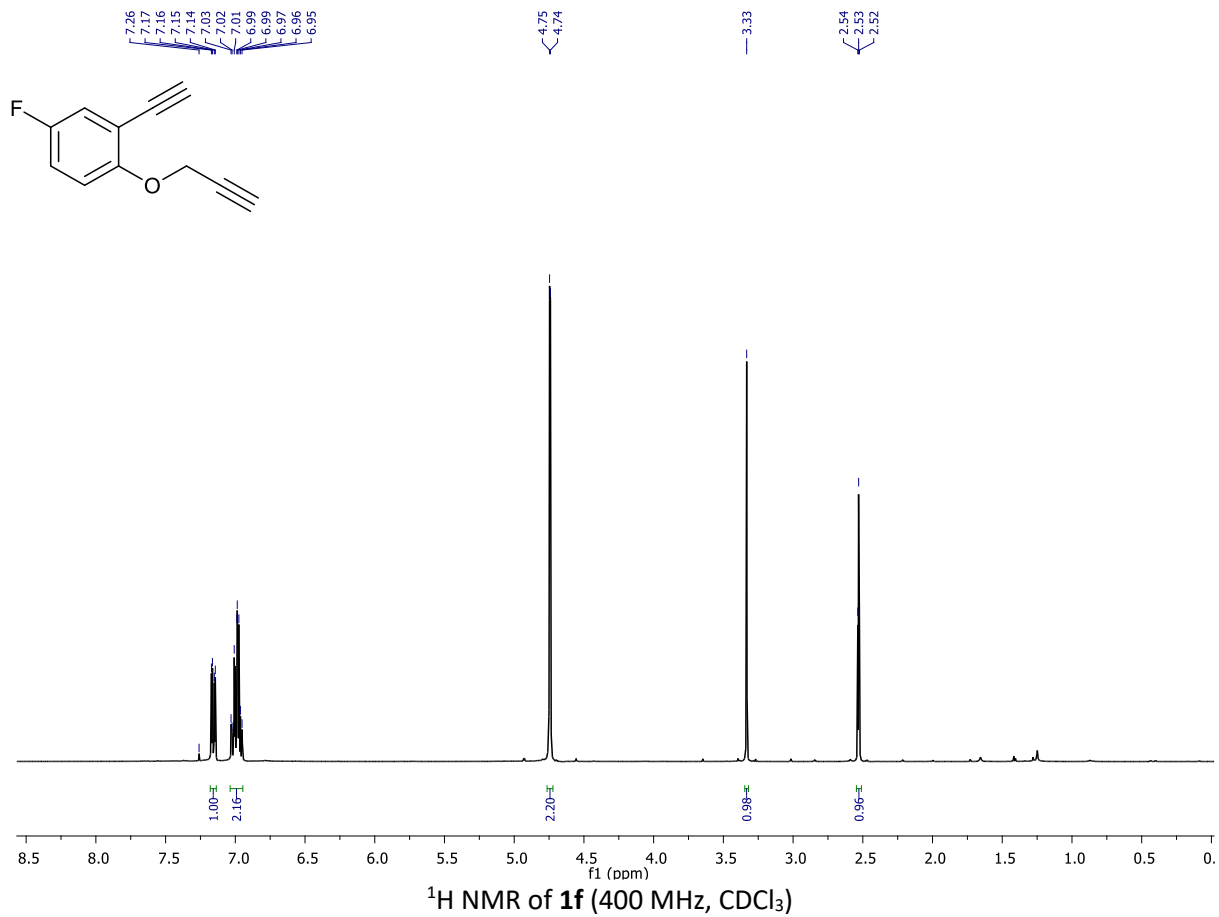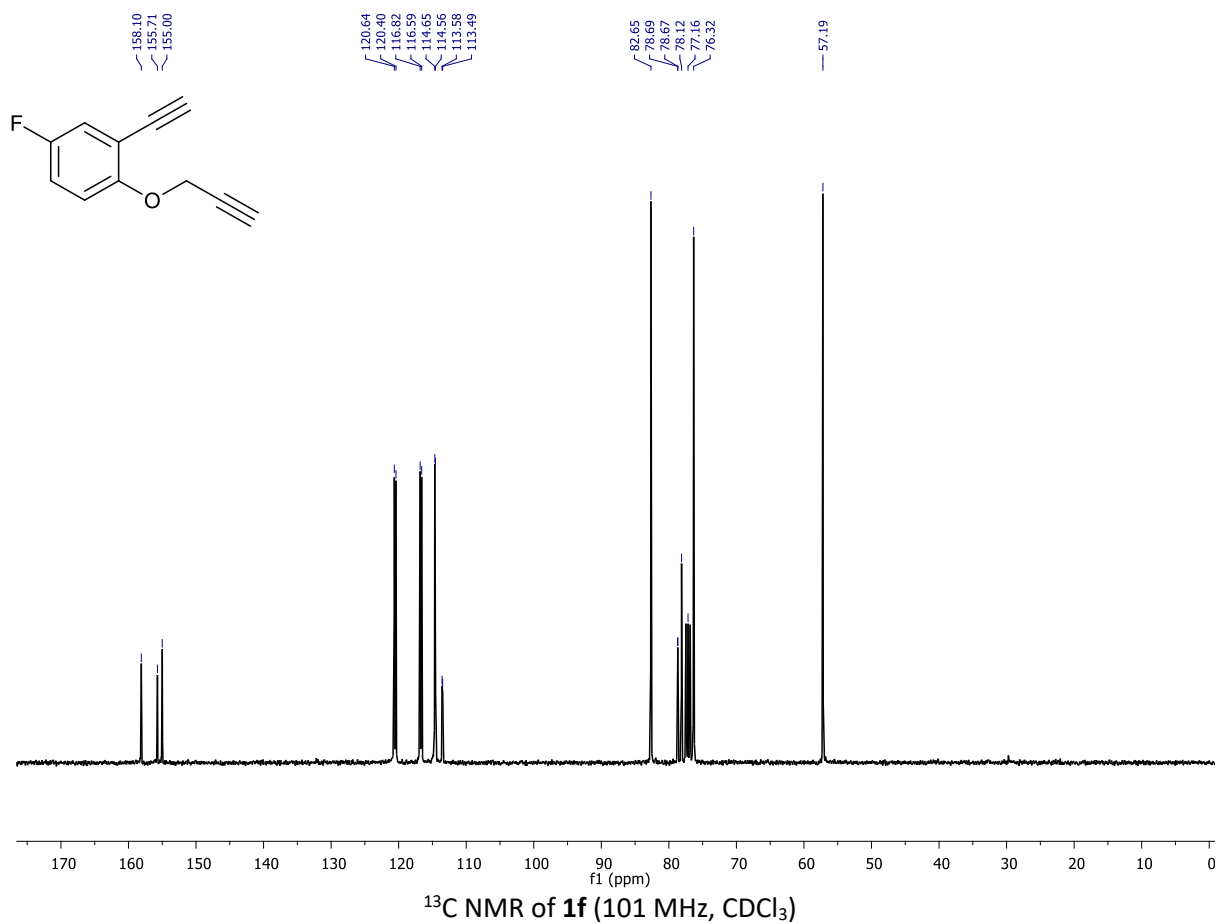

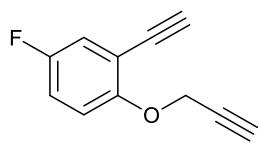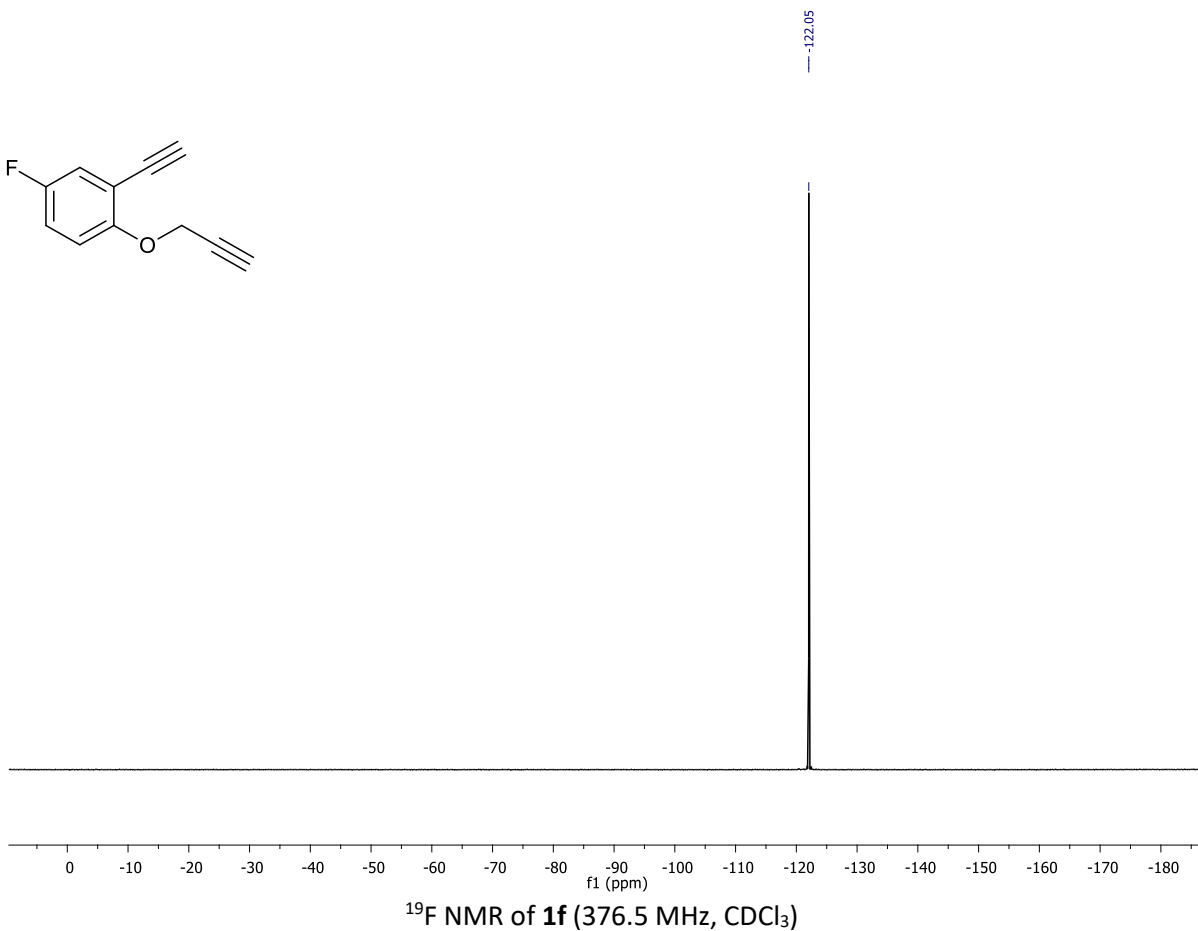

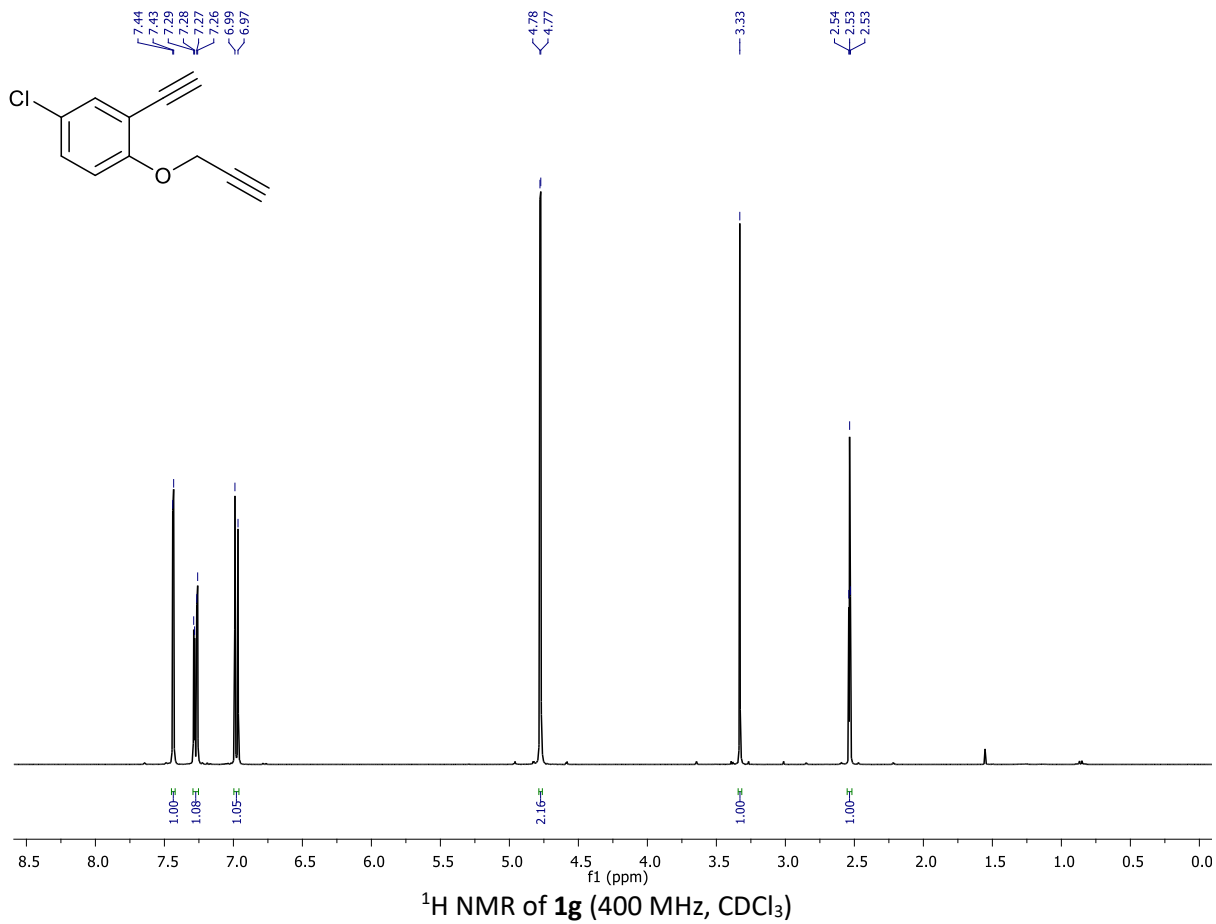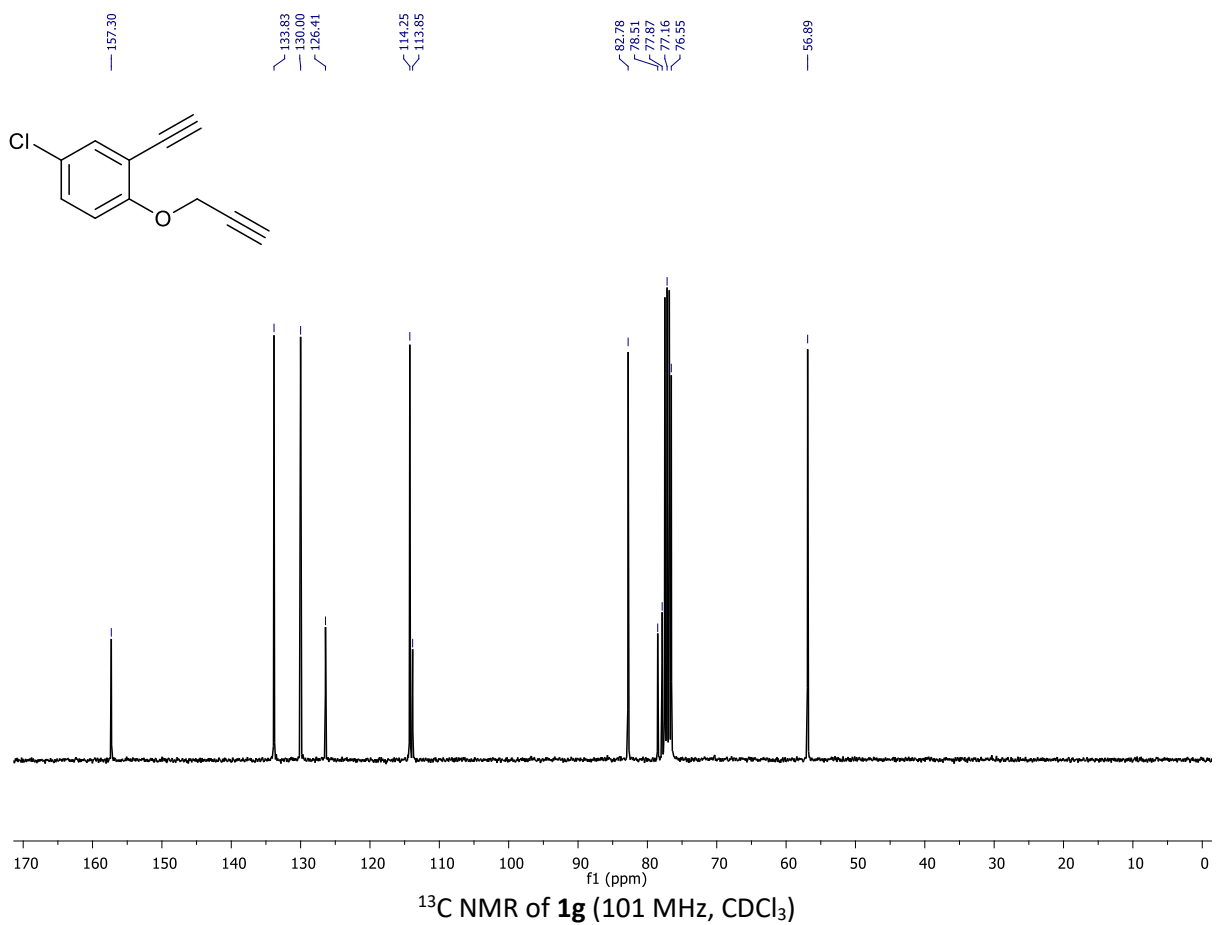



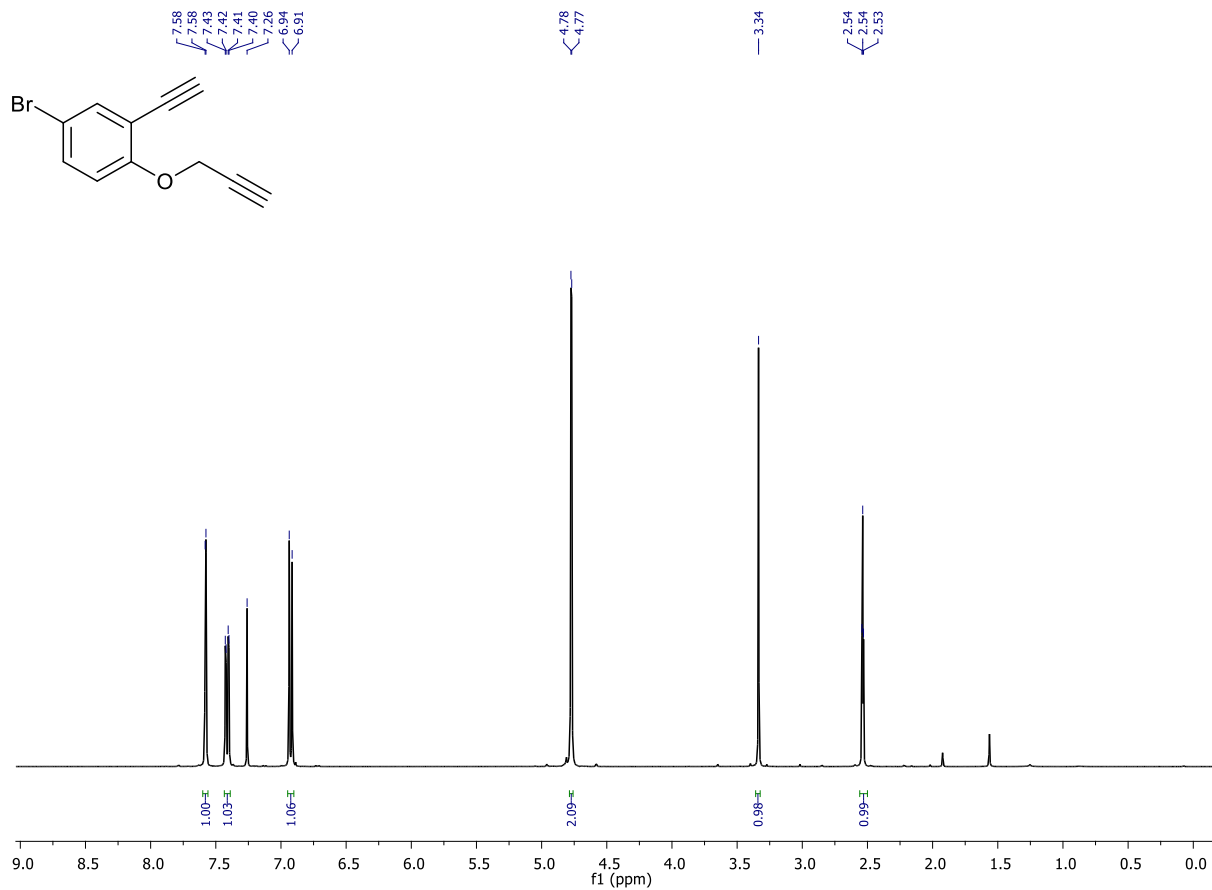

$^1\text{H NMR}$  of **1h** (400 MHz,  $\text{CDCl}_3$ )

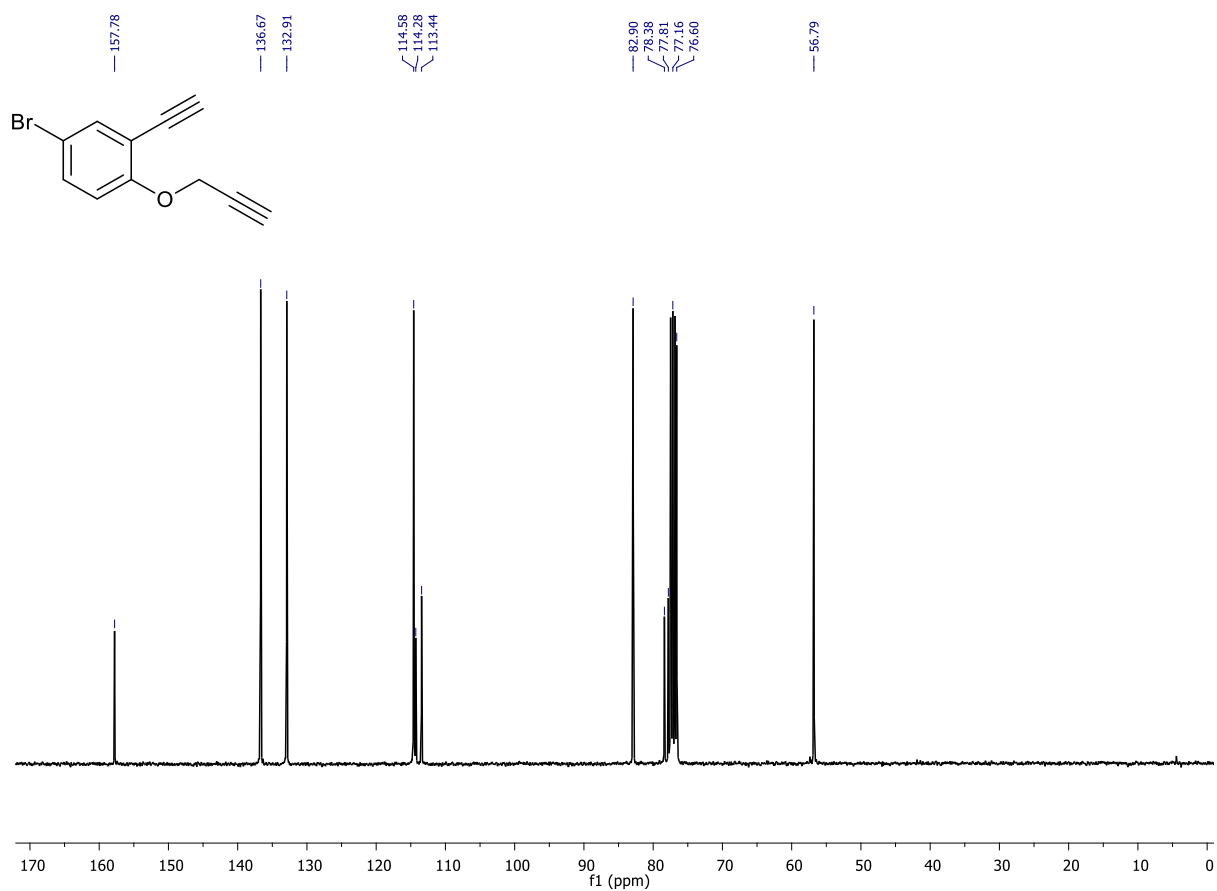

$^{13}\text{C NMR}$  of **1h** (101 MHz,  $\text{CDCl}_3$ )

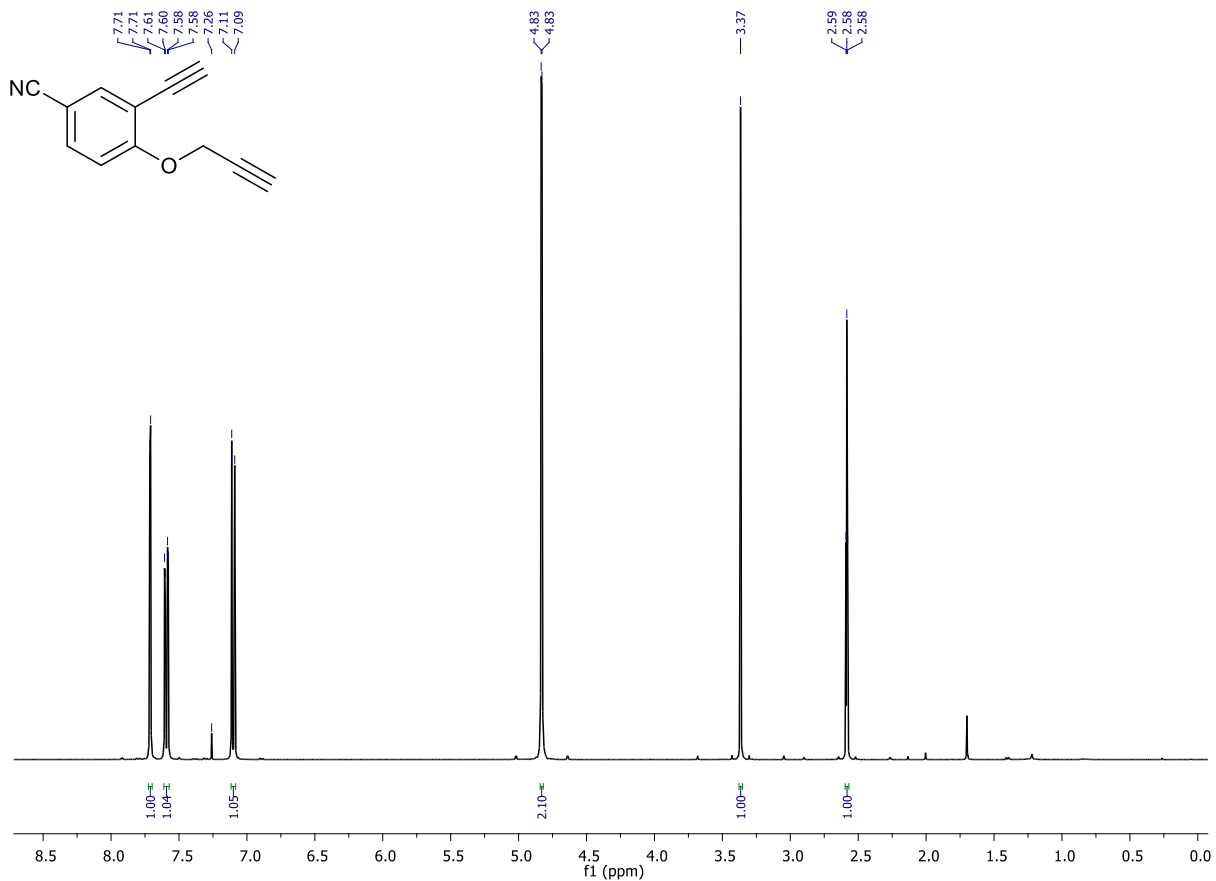

$^1\text{H NMR}$  of **1i** (400 MHz,  $\text{CDCl}_3$ )

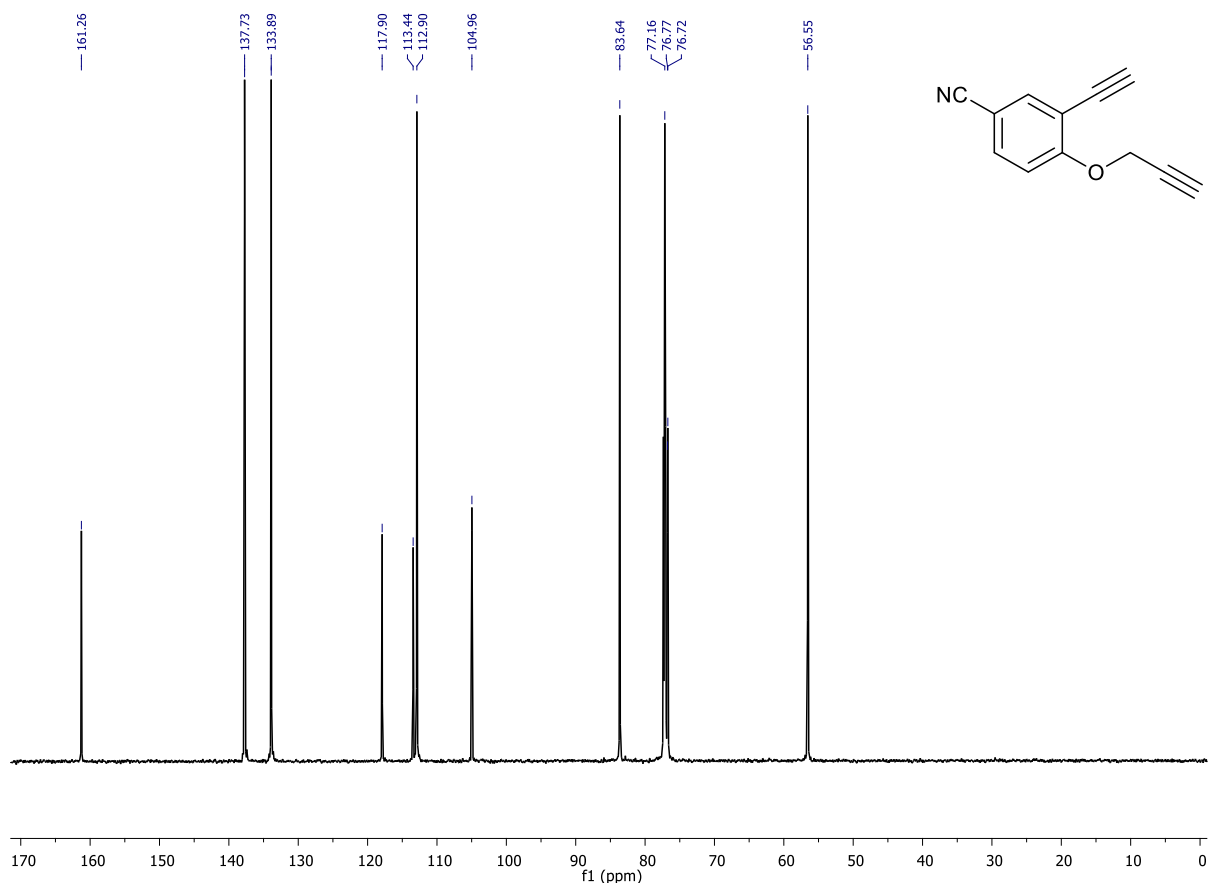

$^{13}\text{C NMR}$  of **1i** (101 MHz,  $\text{CDCl}_3$ )

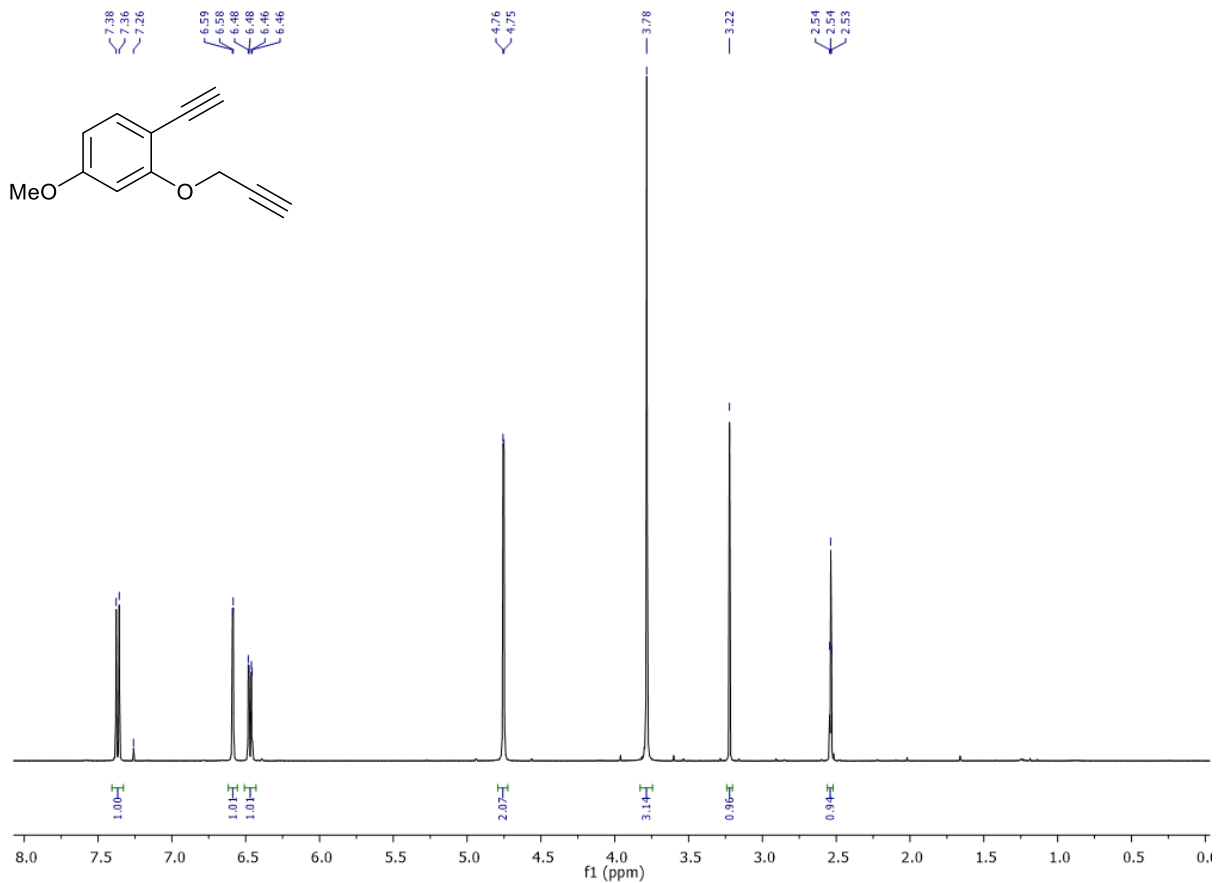

<sup>1</sup>H NMR of **1j** (400 MHz, CDCl<sub>3</sub>)

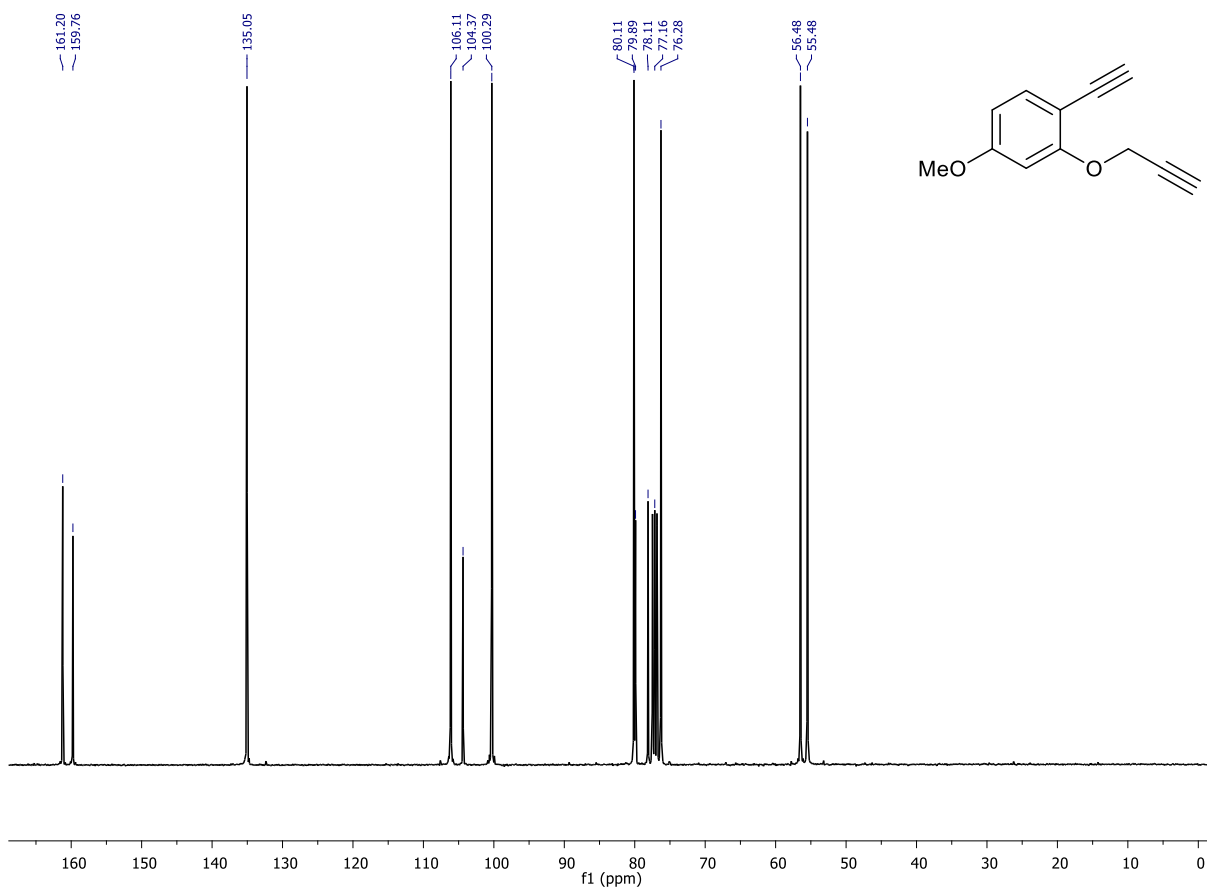

<sup>13</sup>C NMR of **1j** (101 MHz, CDCl<sub>3</sub>)

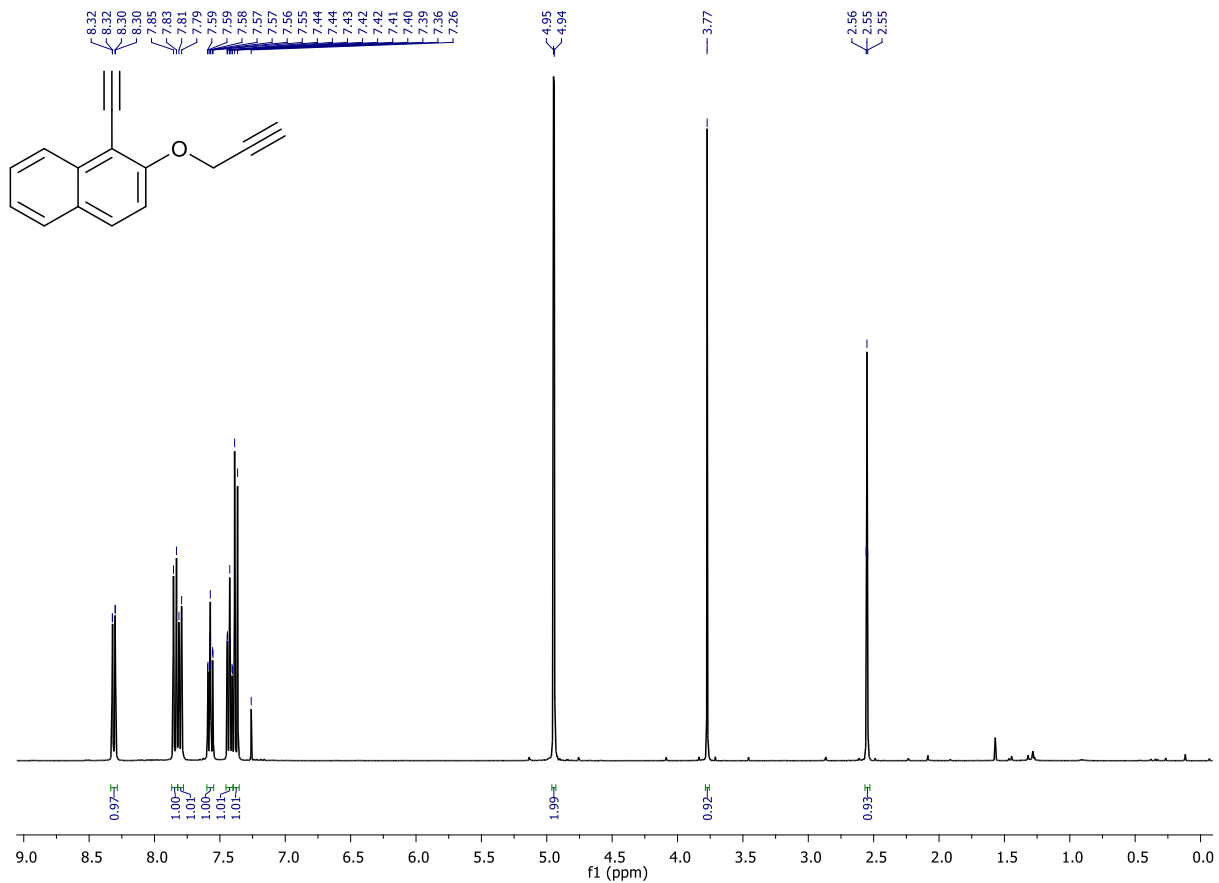

<sup>1</sup>H NMR of **1k** (400 MHz, CDCl<sub>3</sub>)

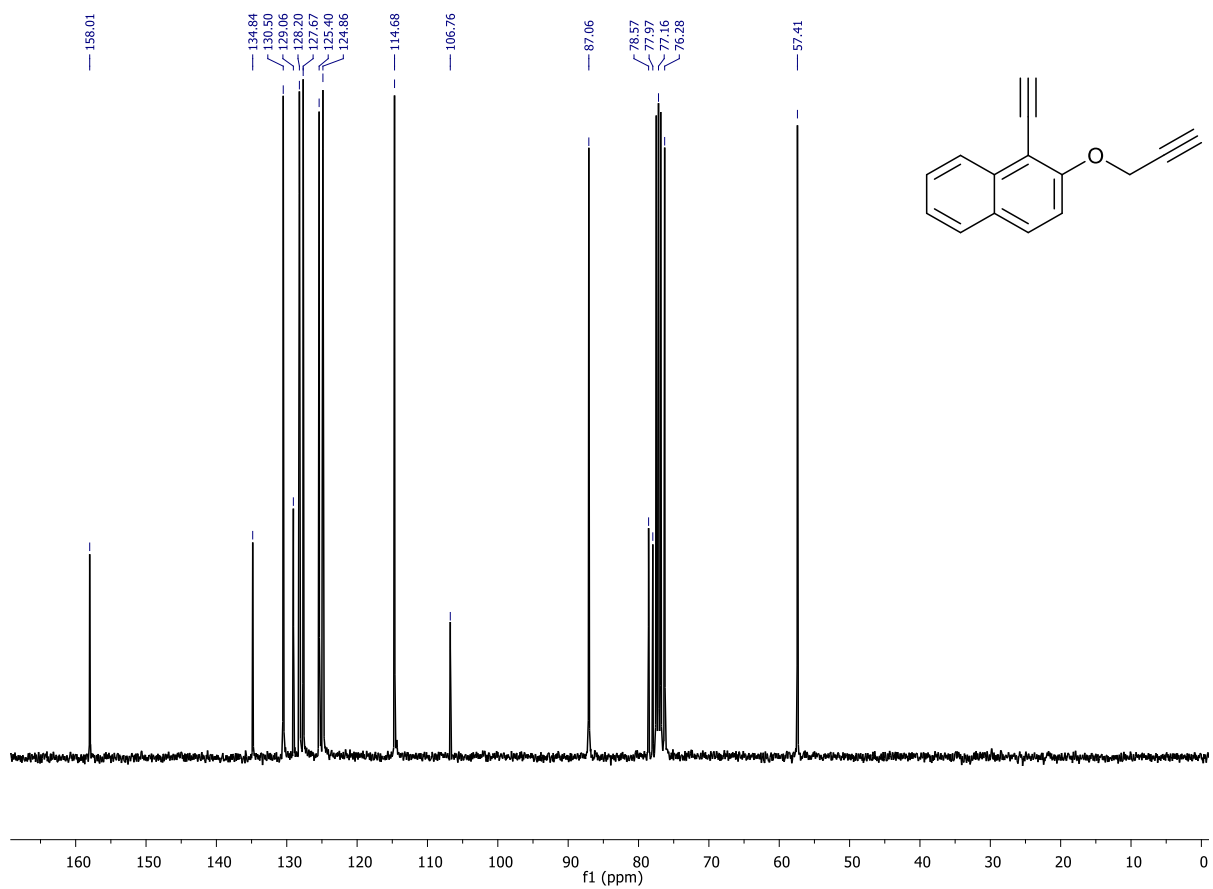

<sup>13</sup>C NMR of **1k** (101 MHz, CDCl<sub>3</sub>)

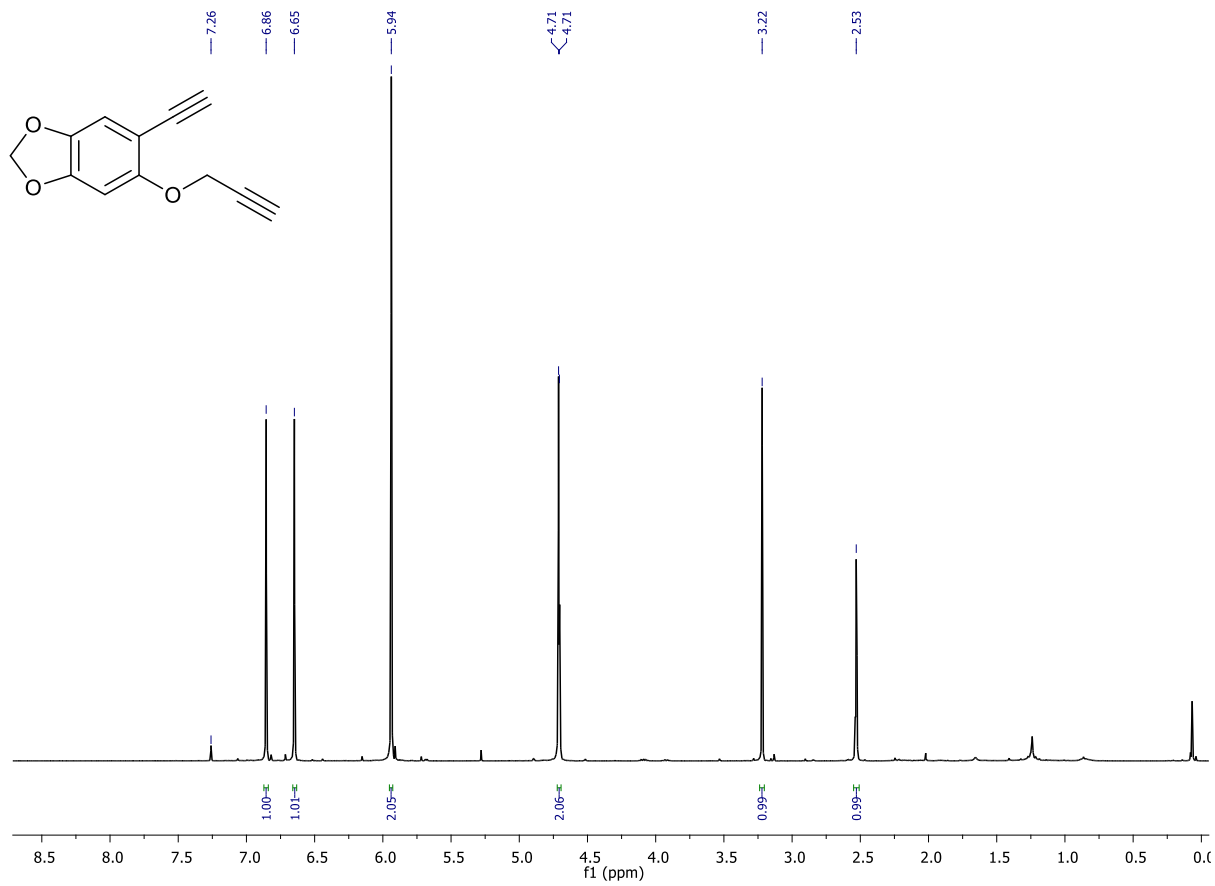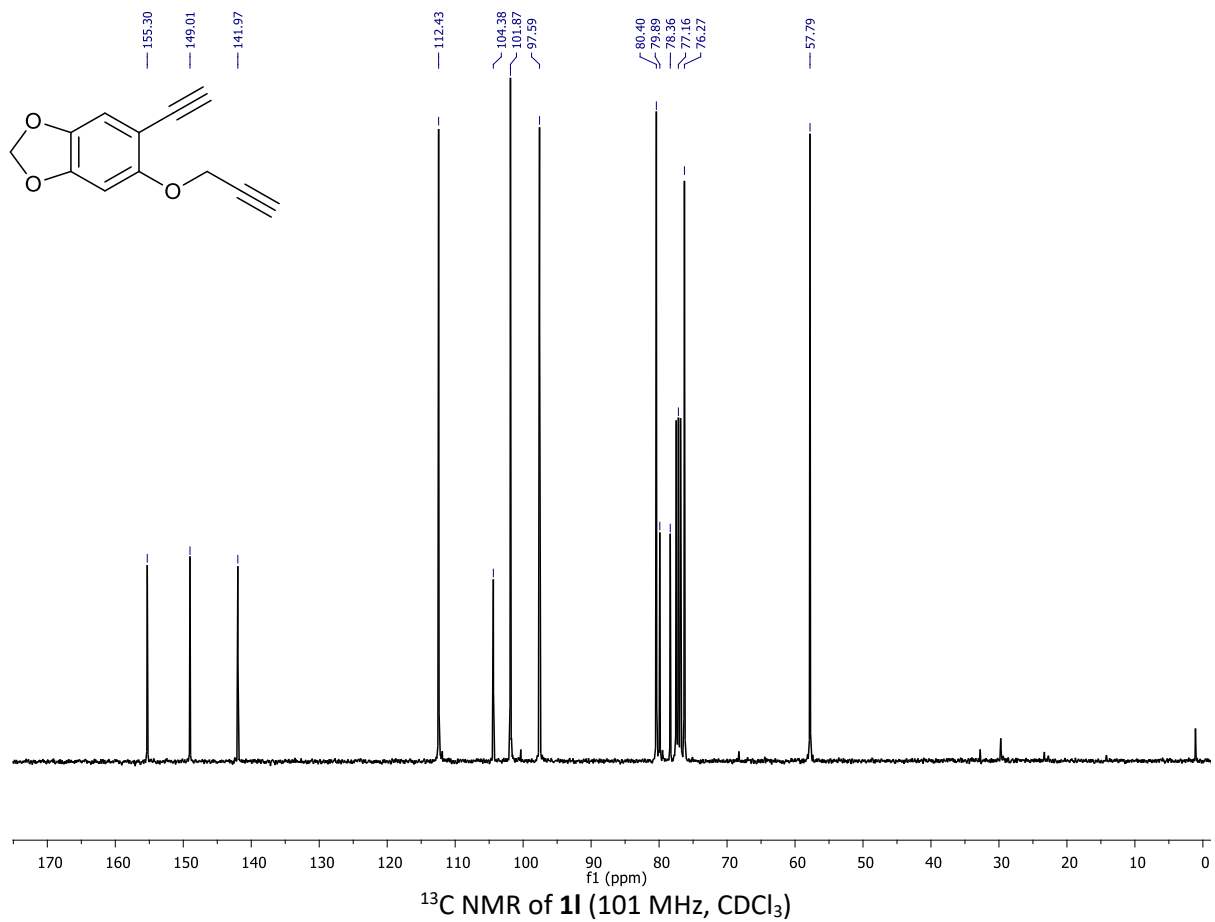

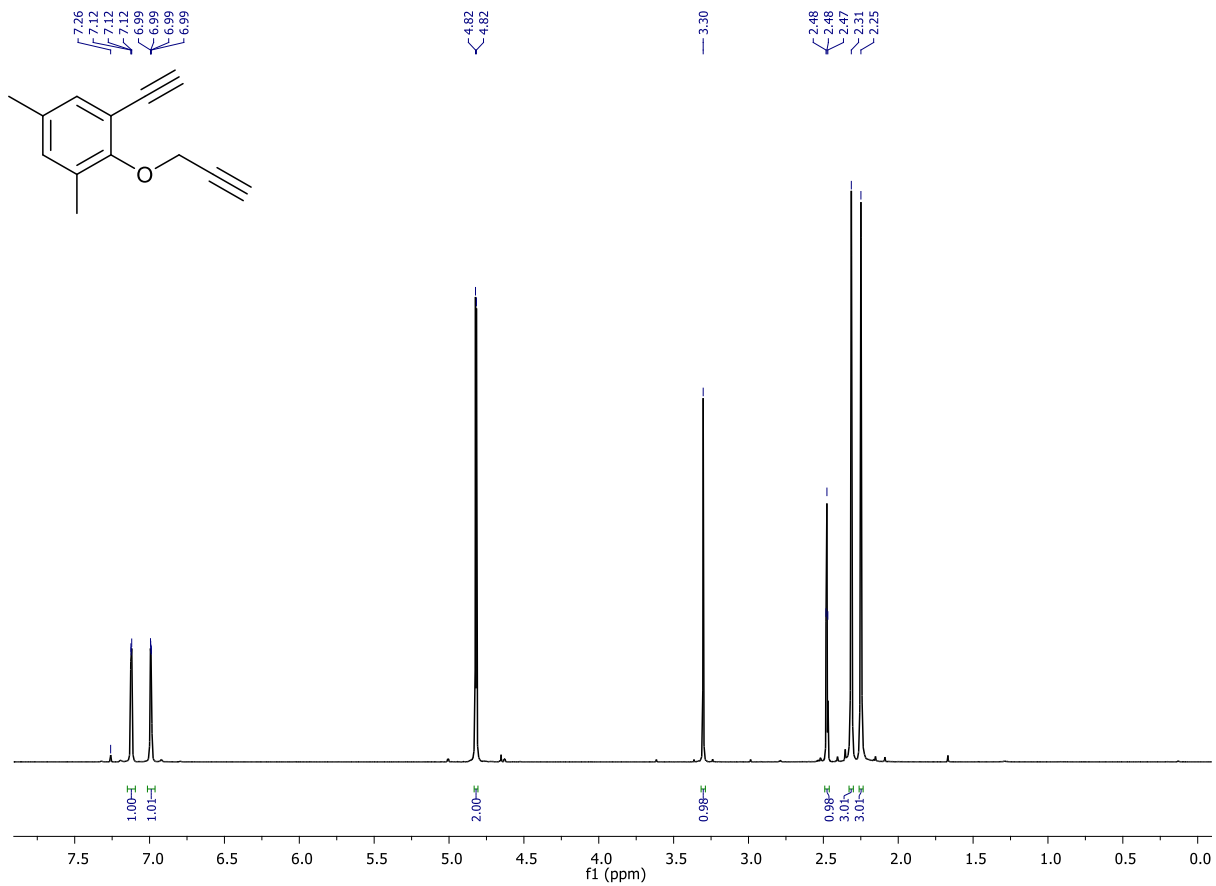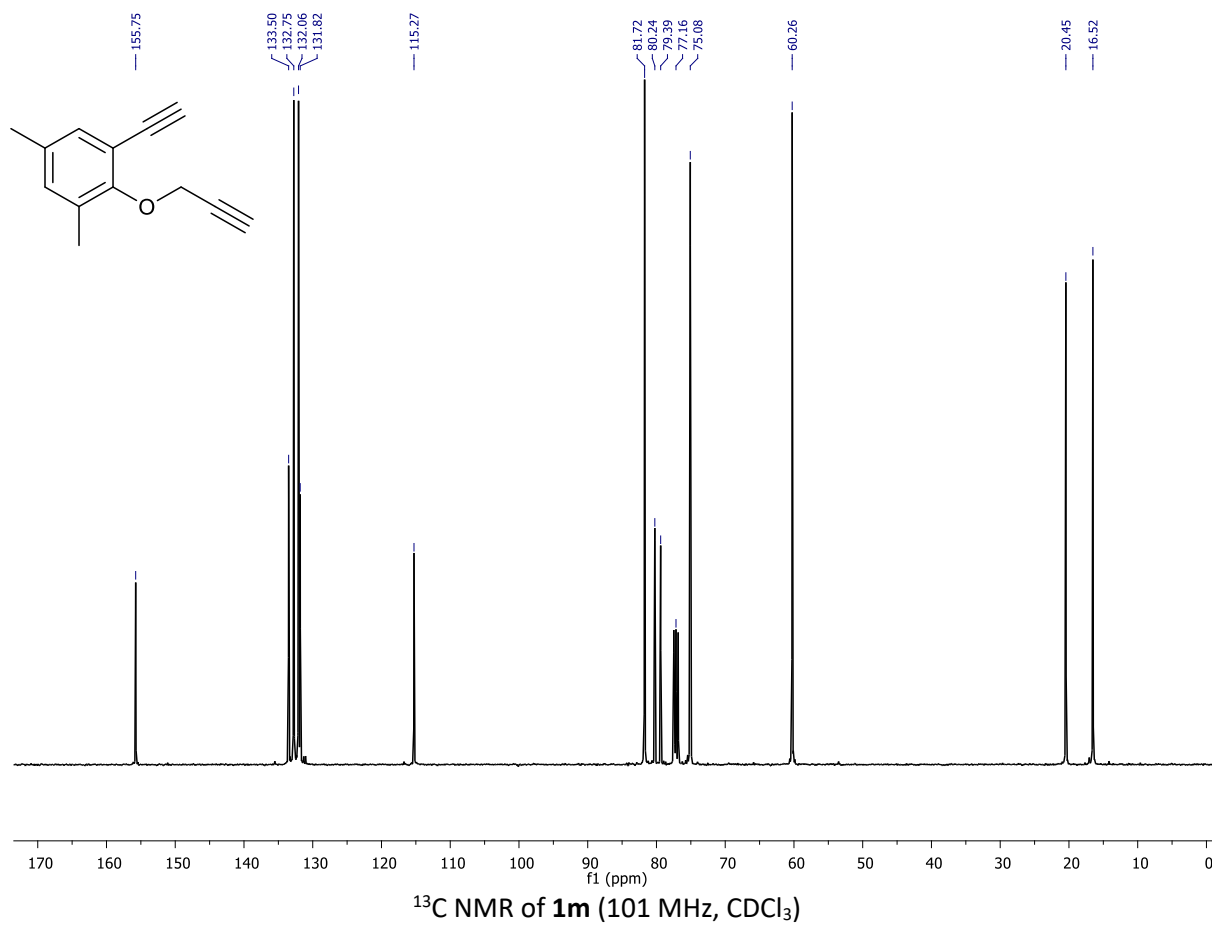

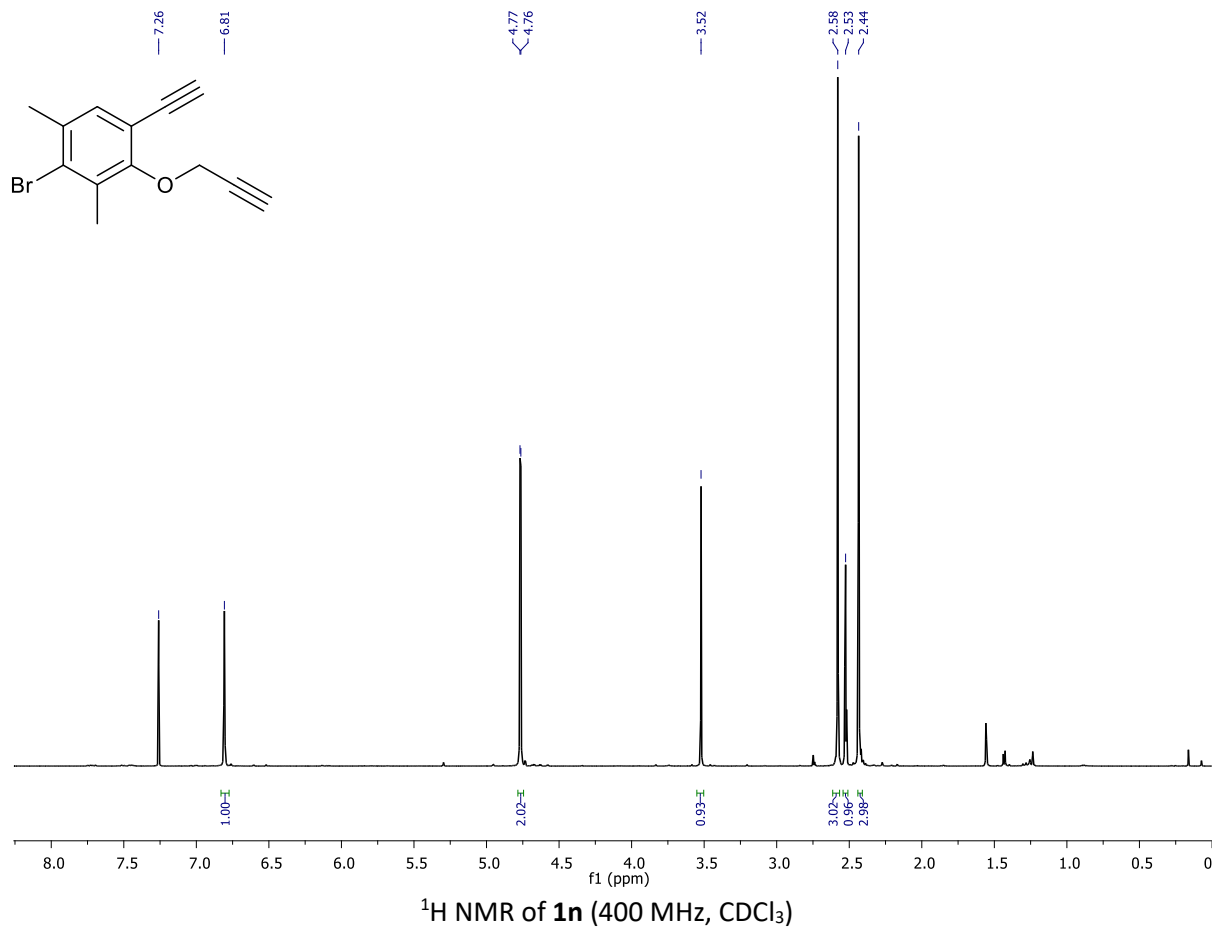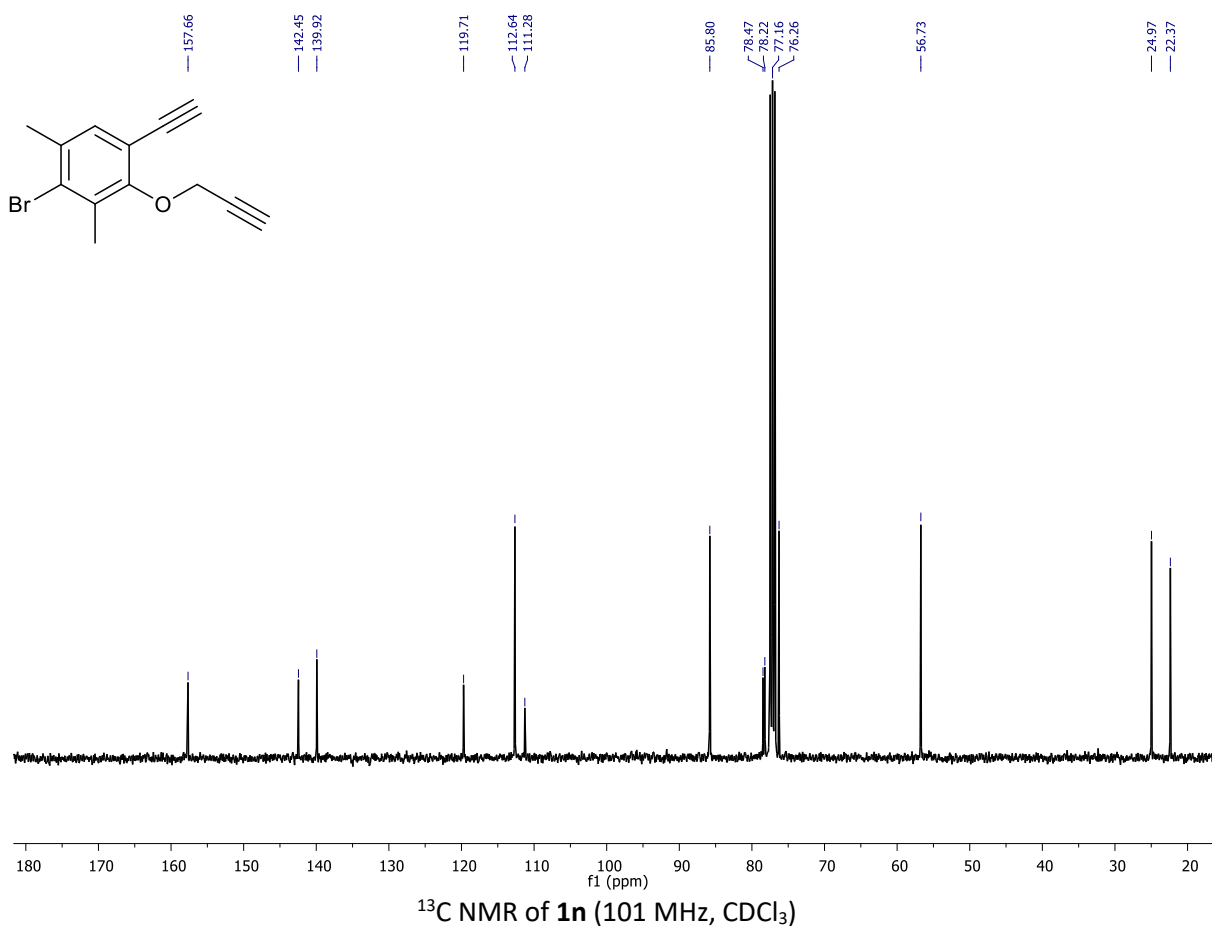

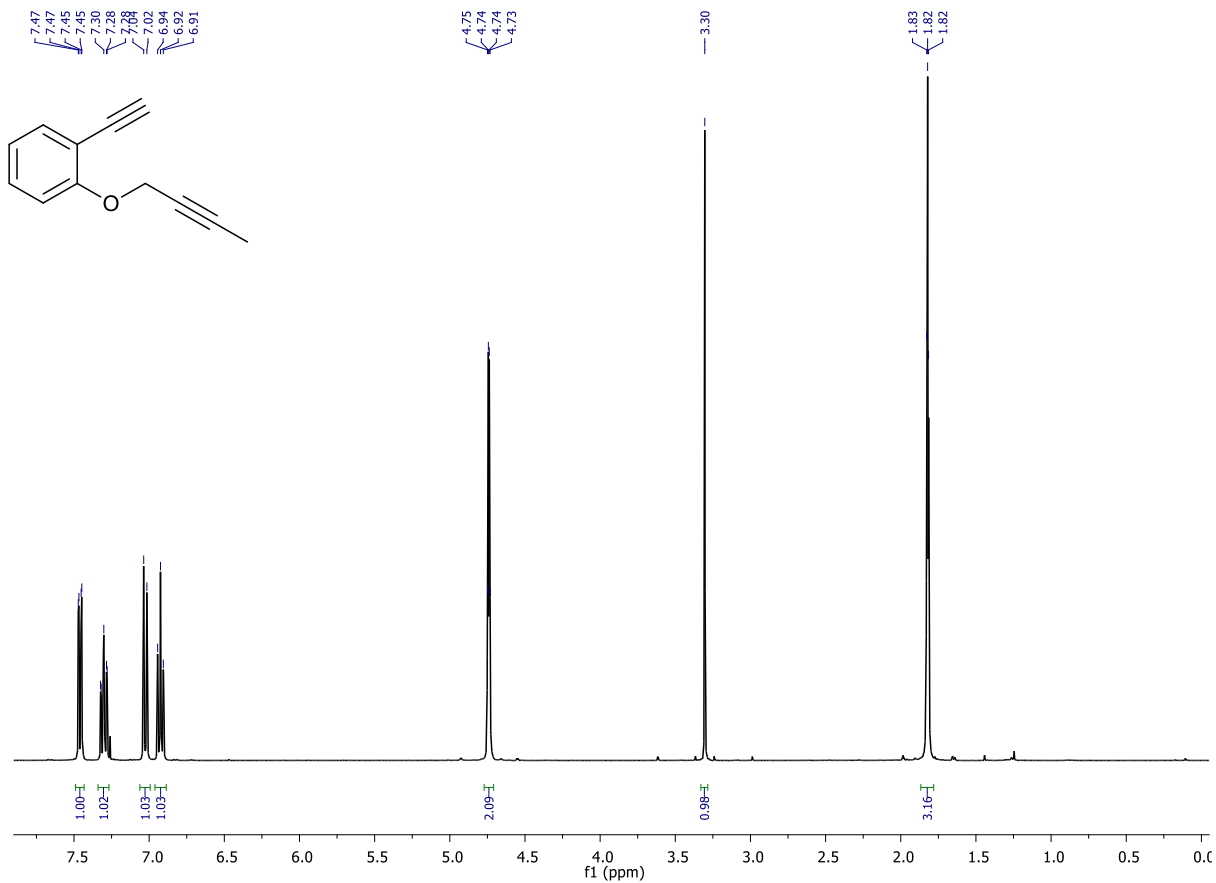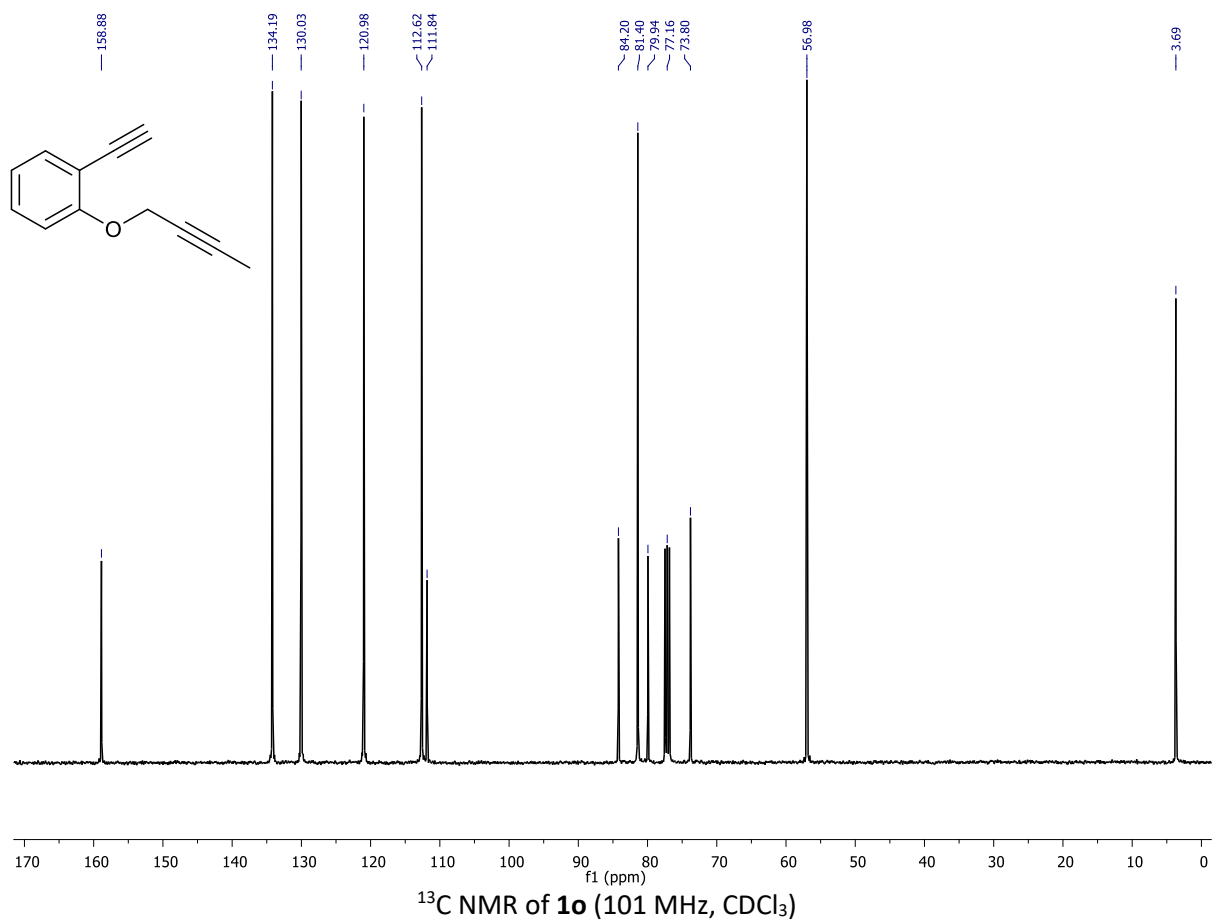



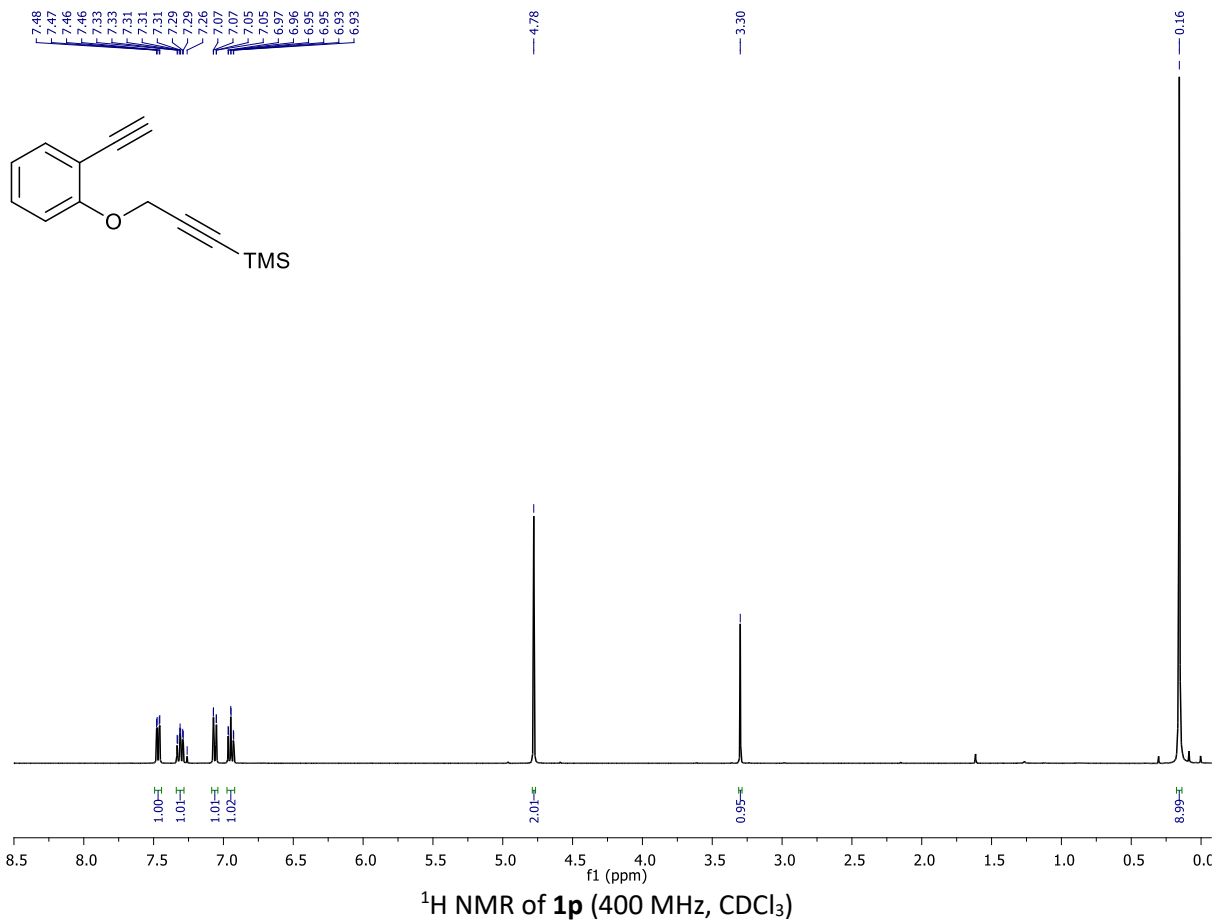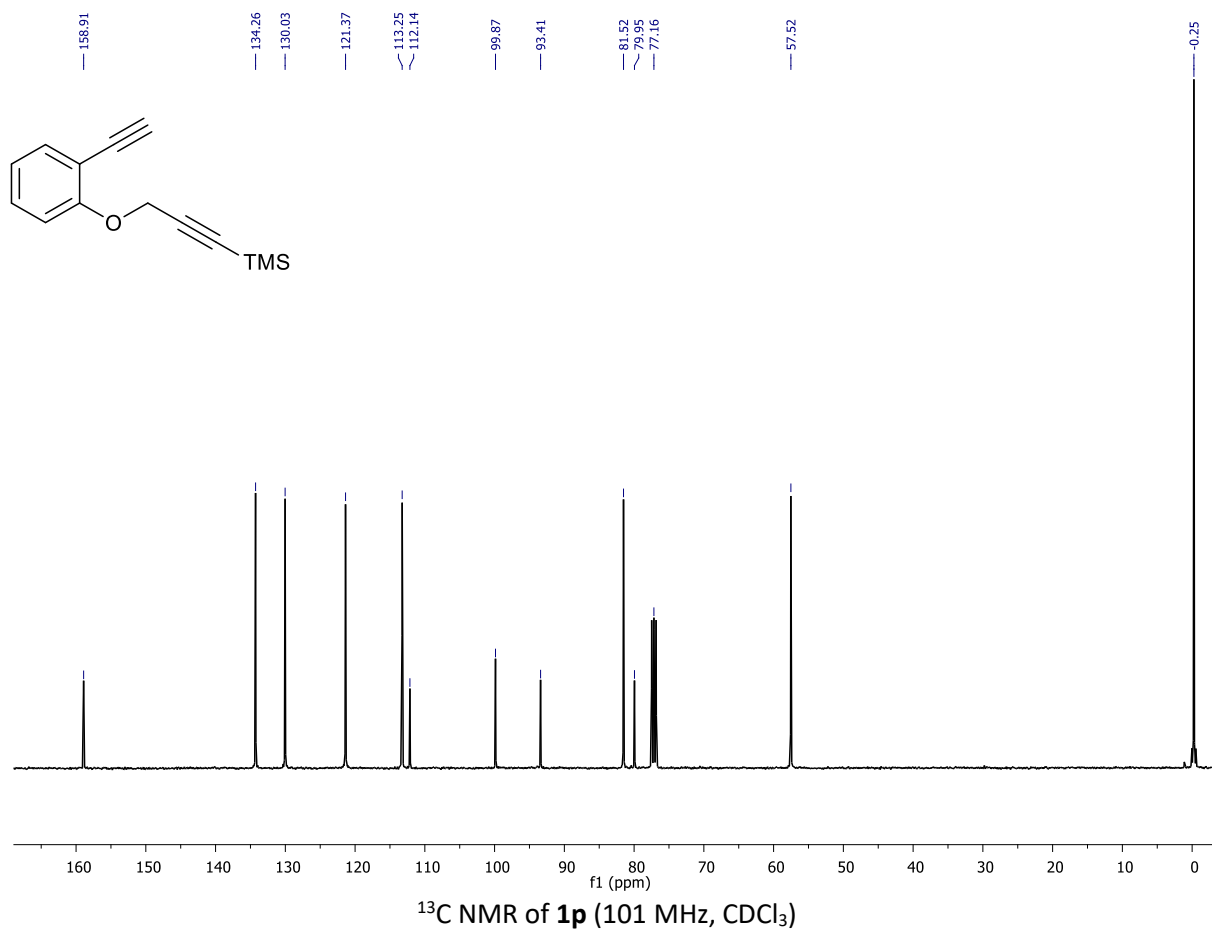

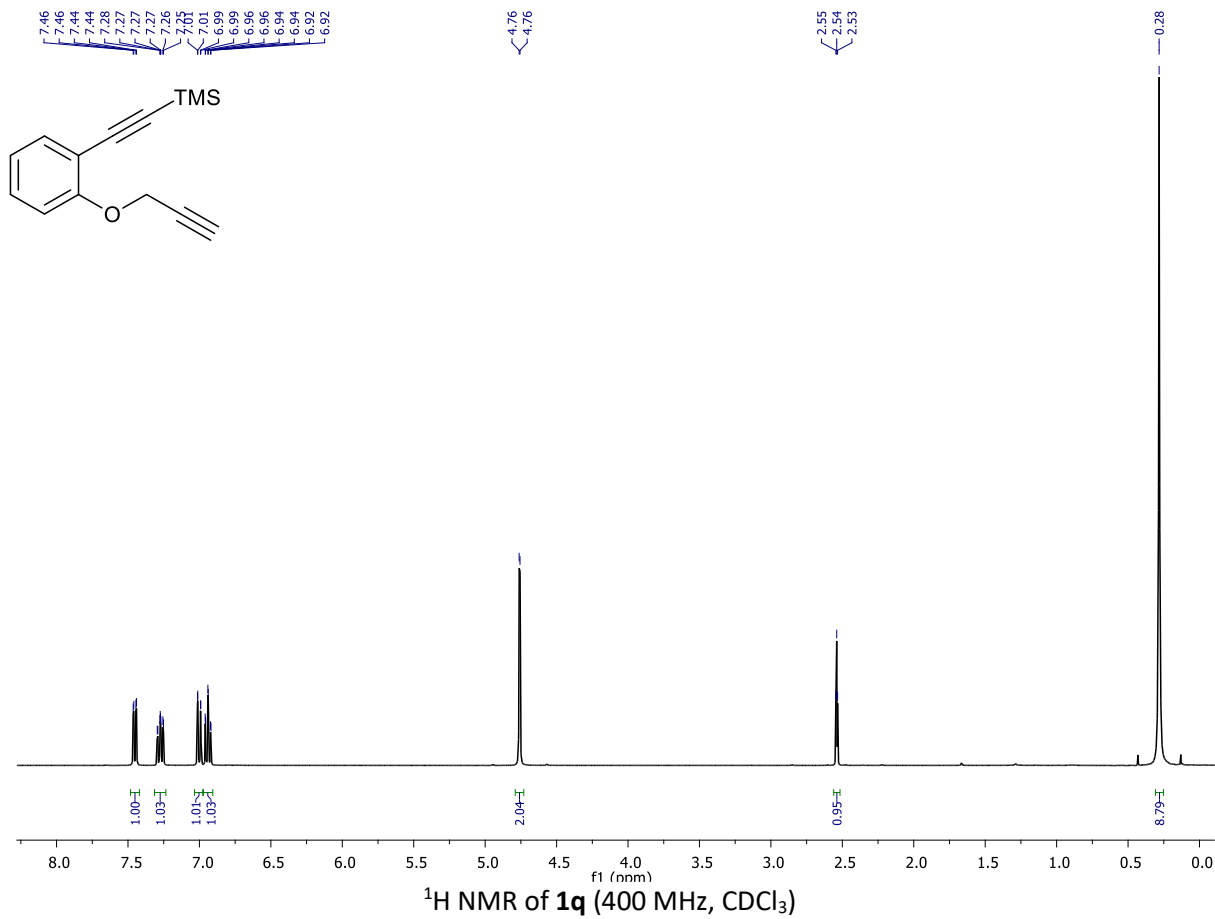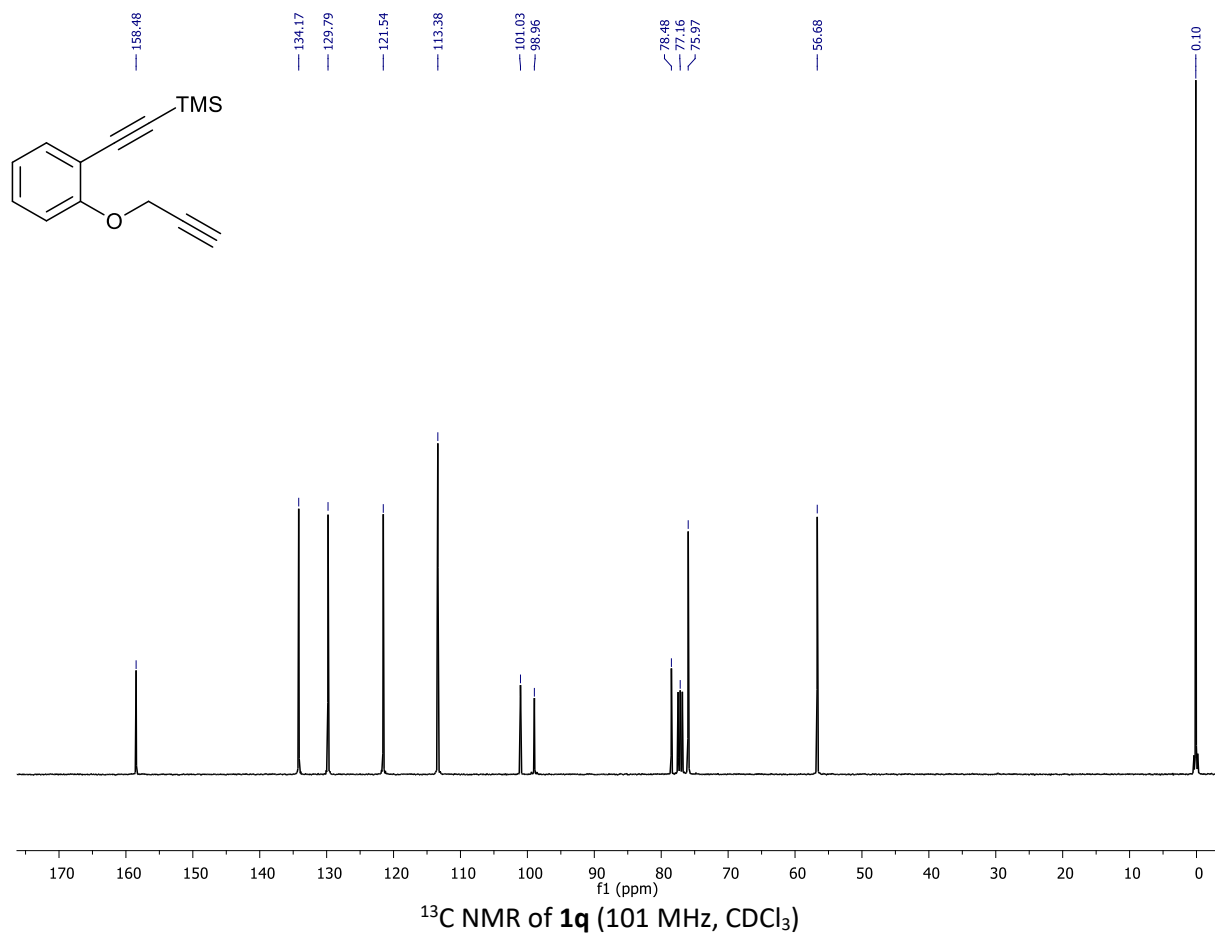

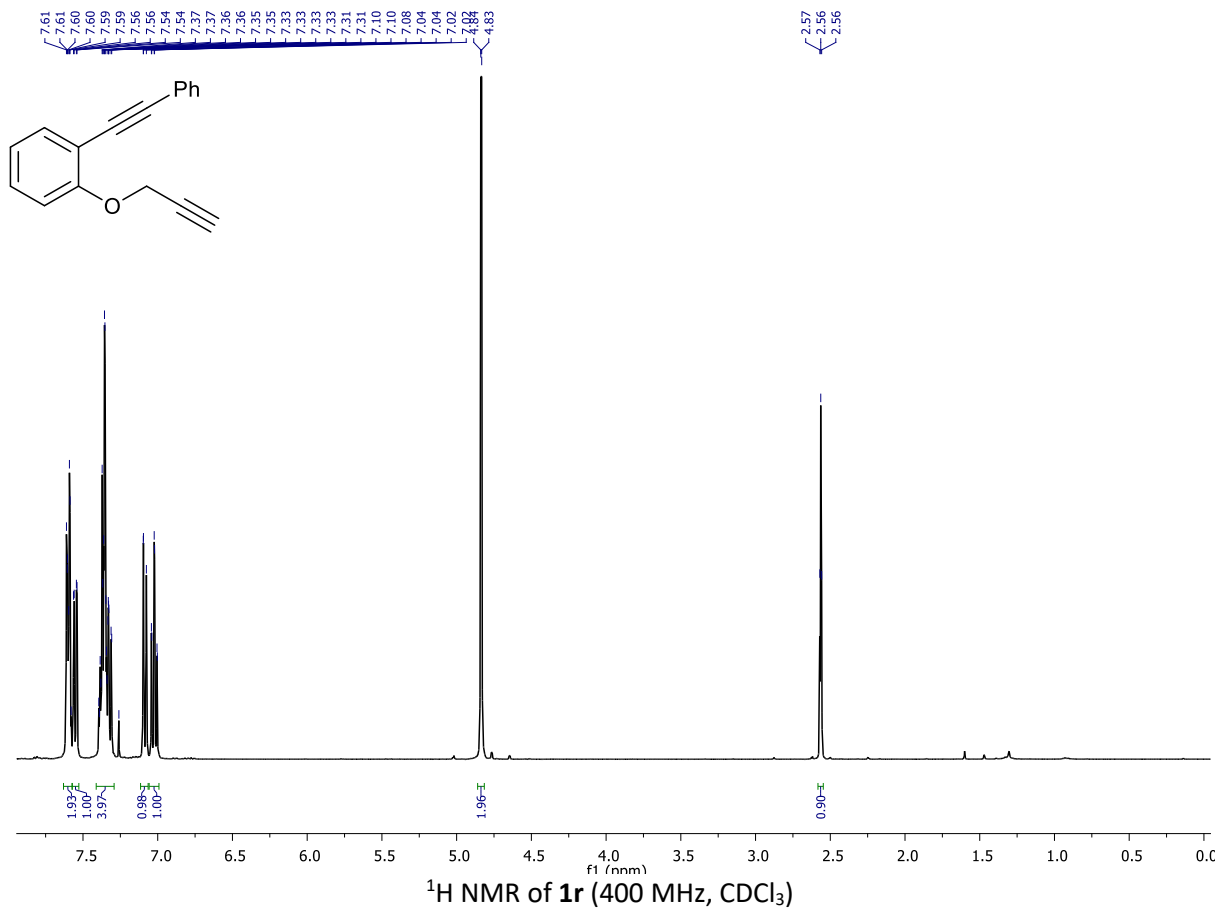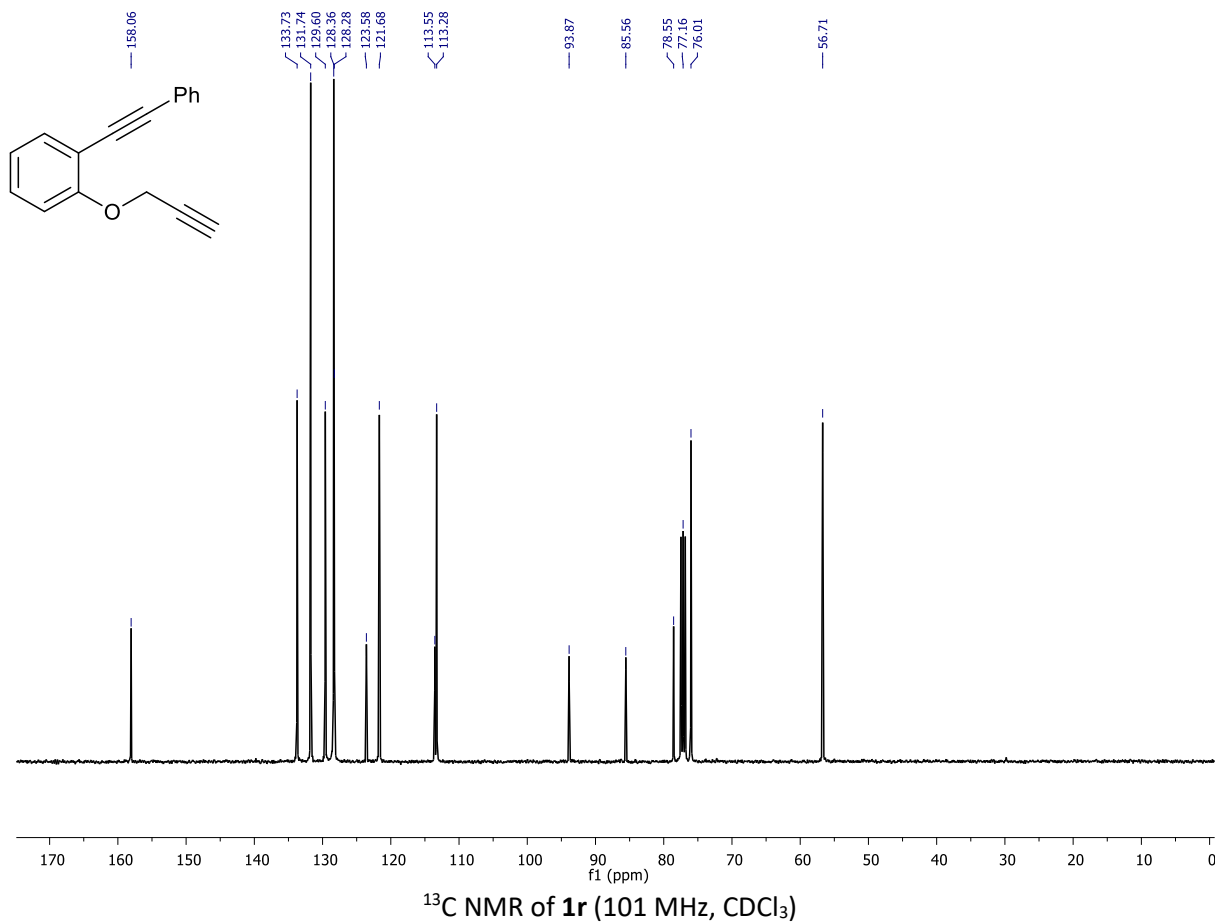

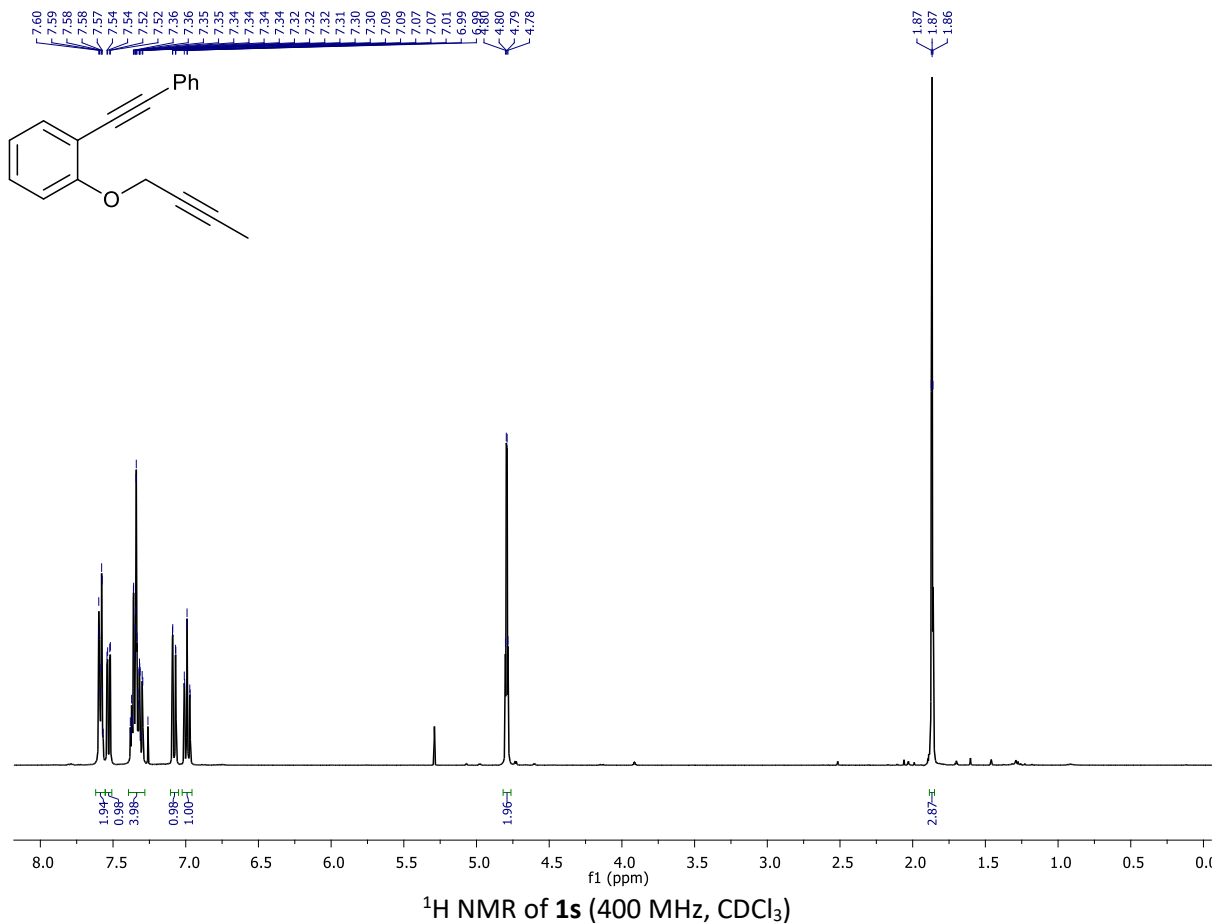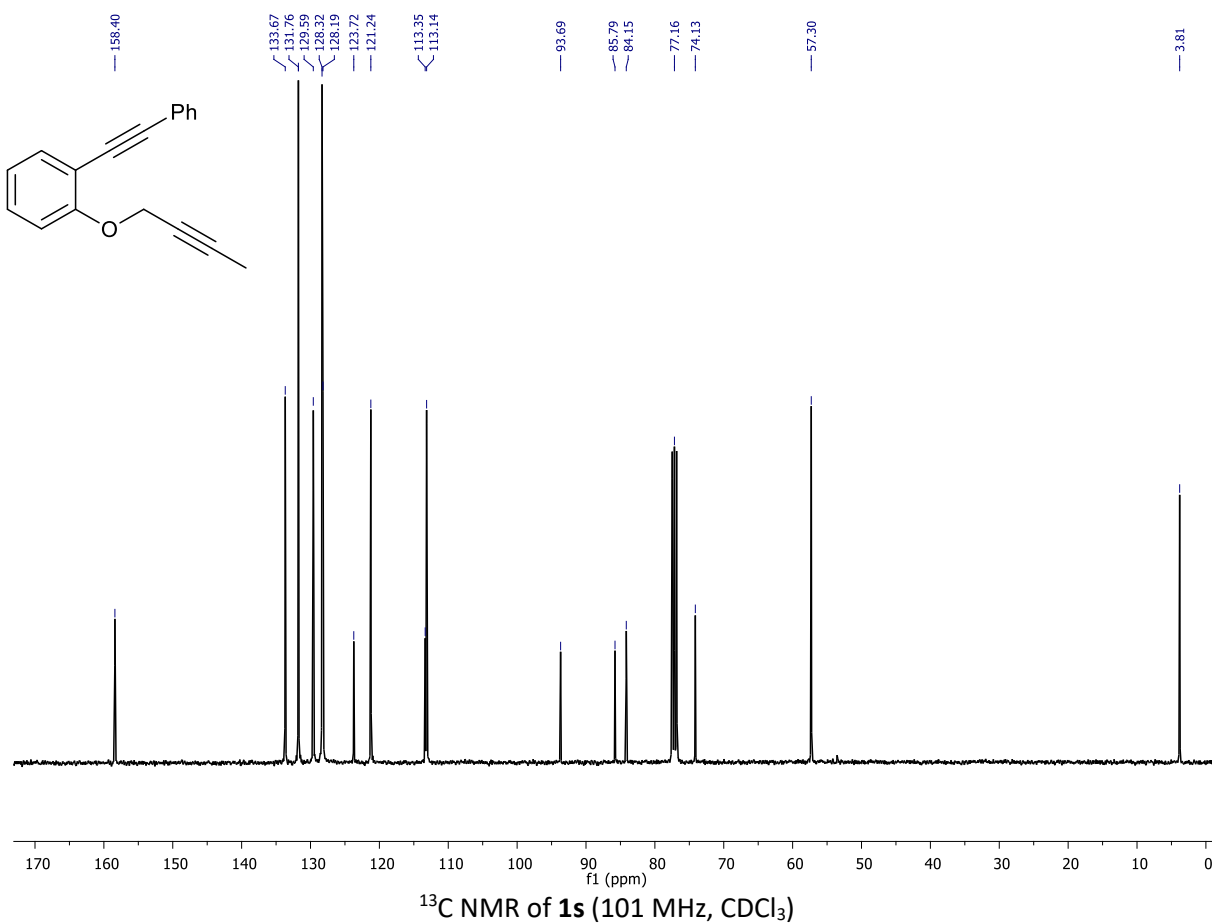

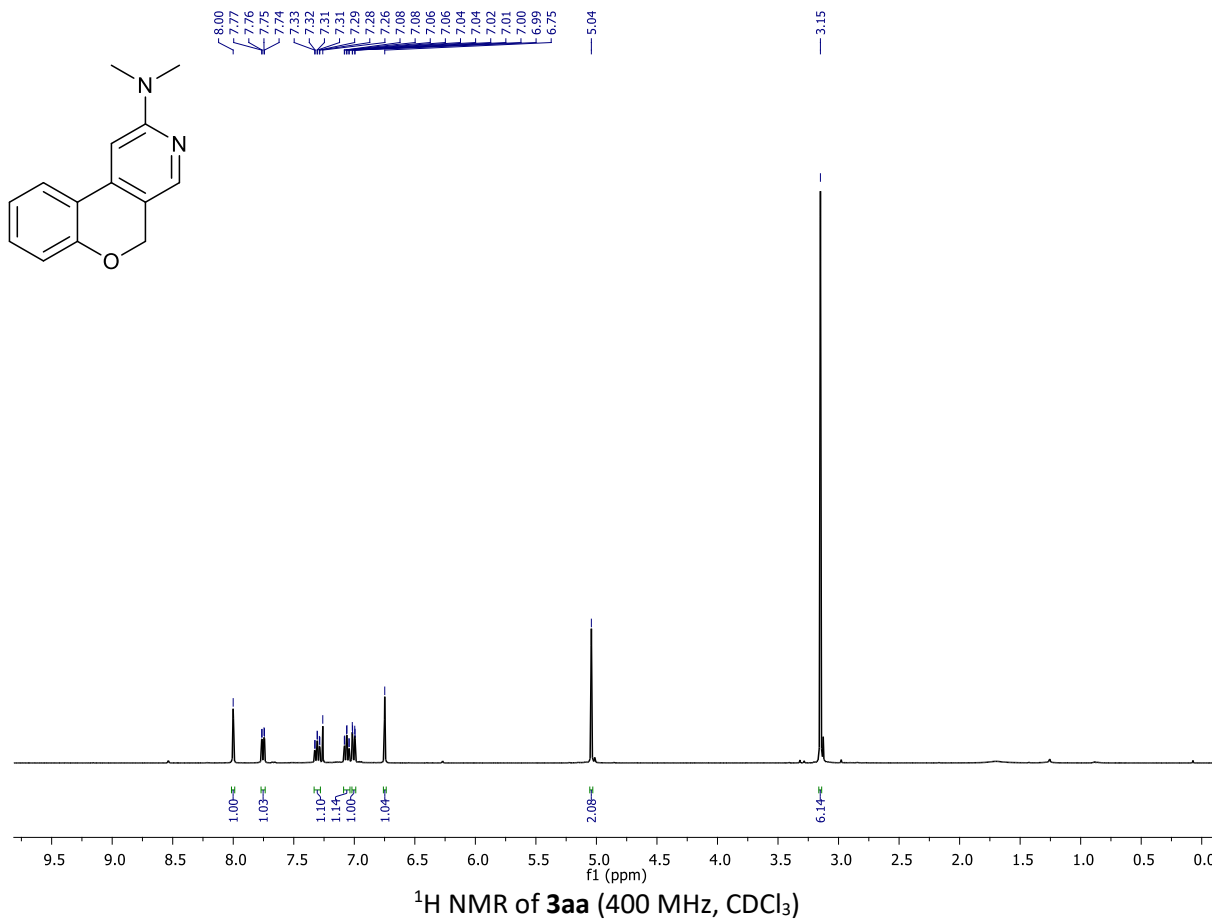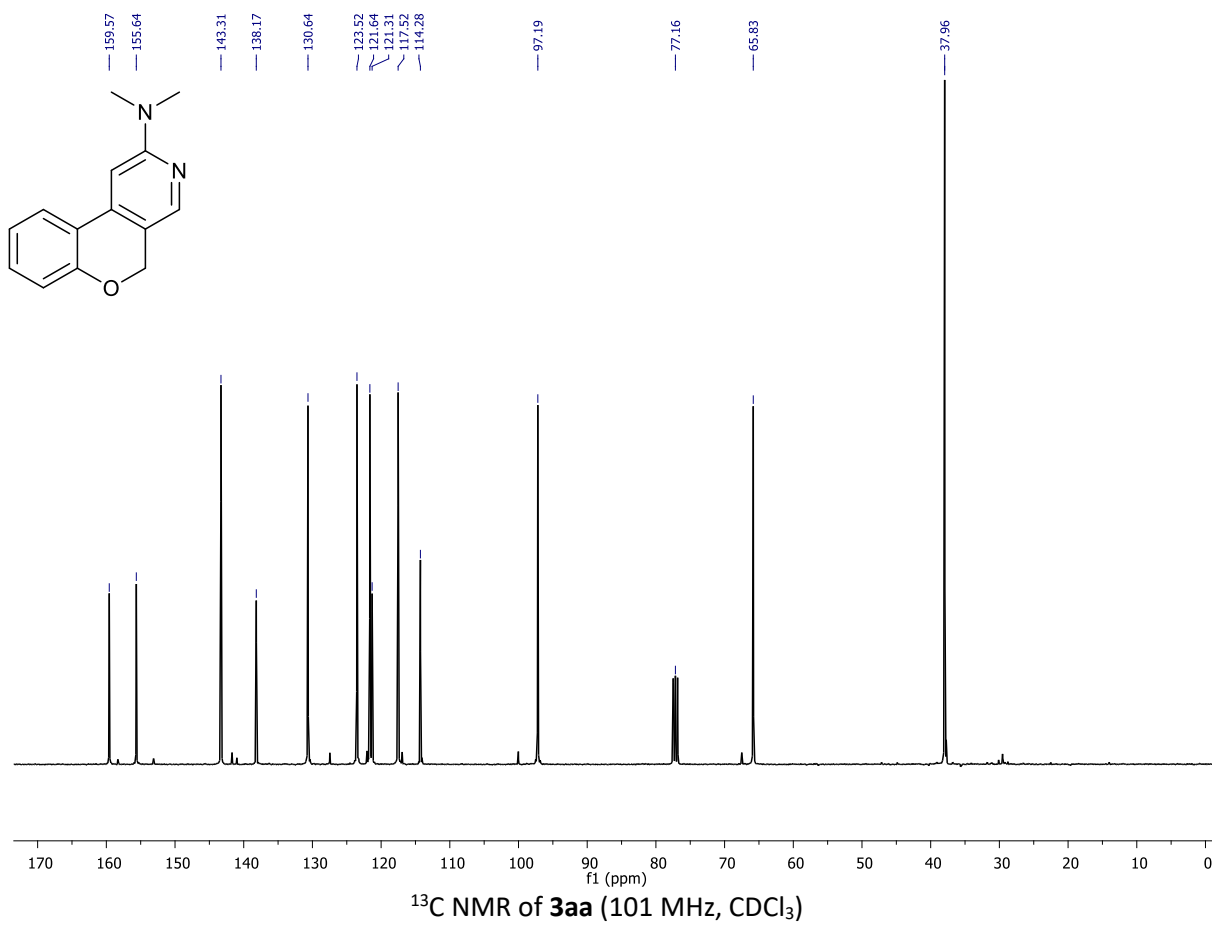

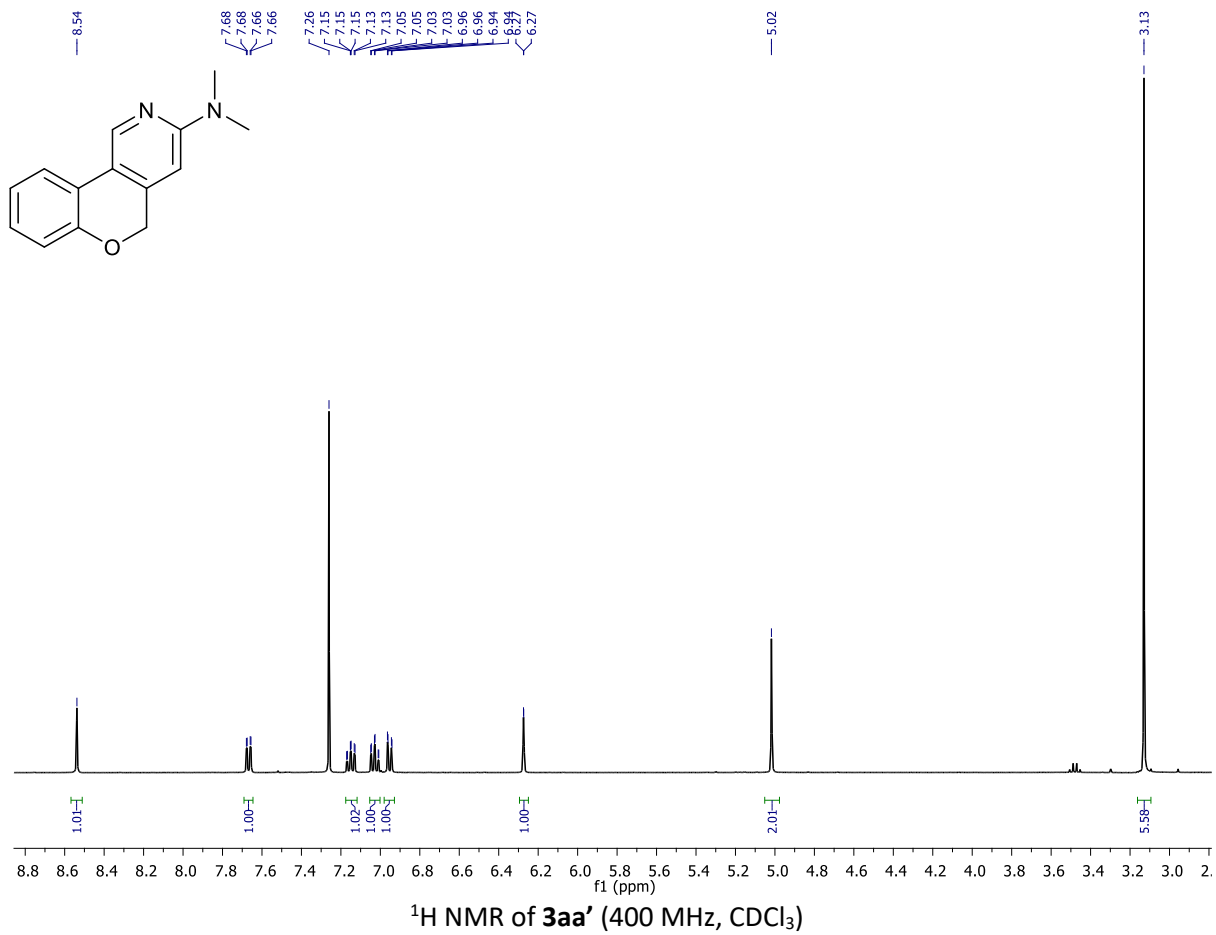

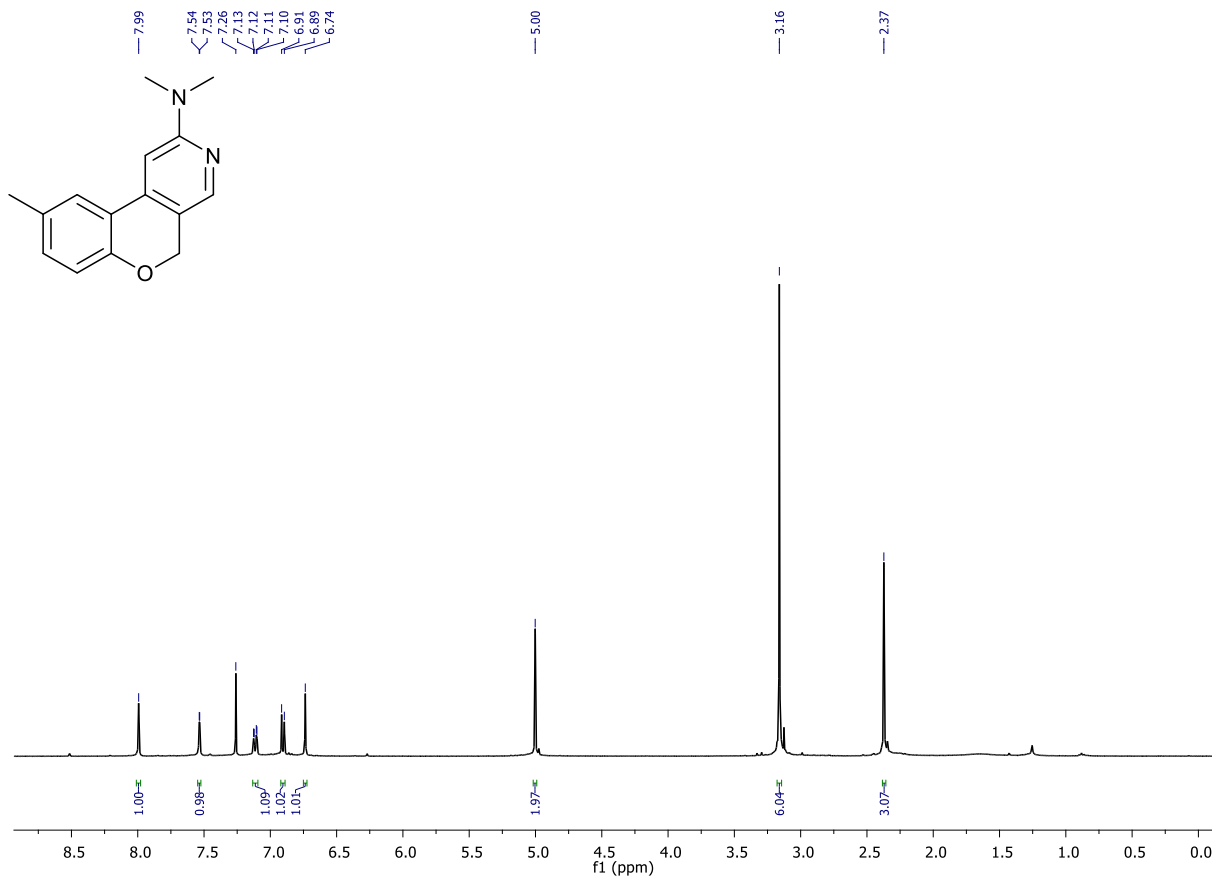

<sup>1</sup>H NMR of **3ba** (400 MHz, CDCl<sub>3</sub>)

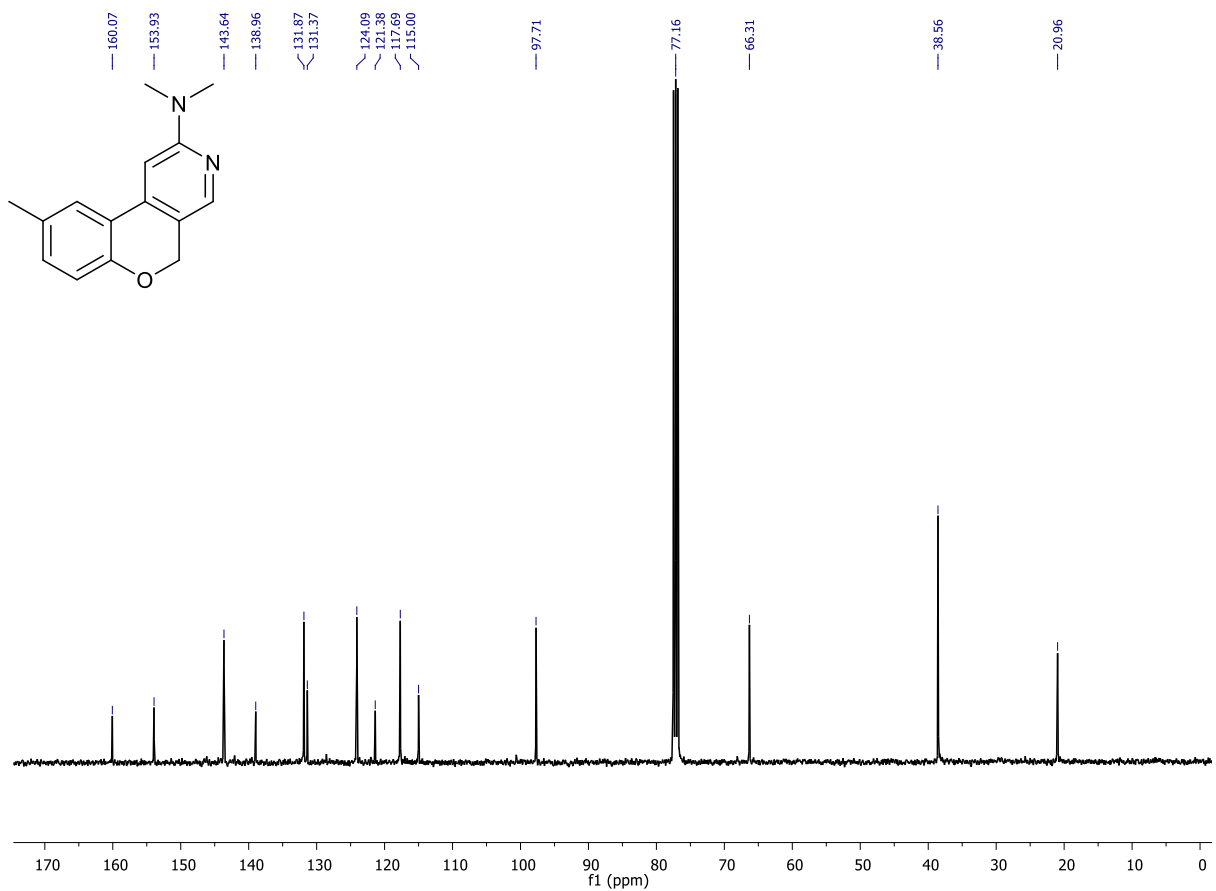

<sup>13</sup>C NMR of **3ba** (101 MHz, CDCl<sub>3</sub>)

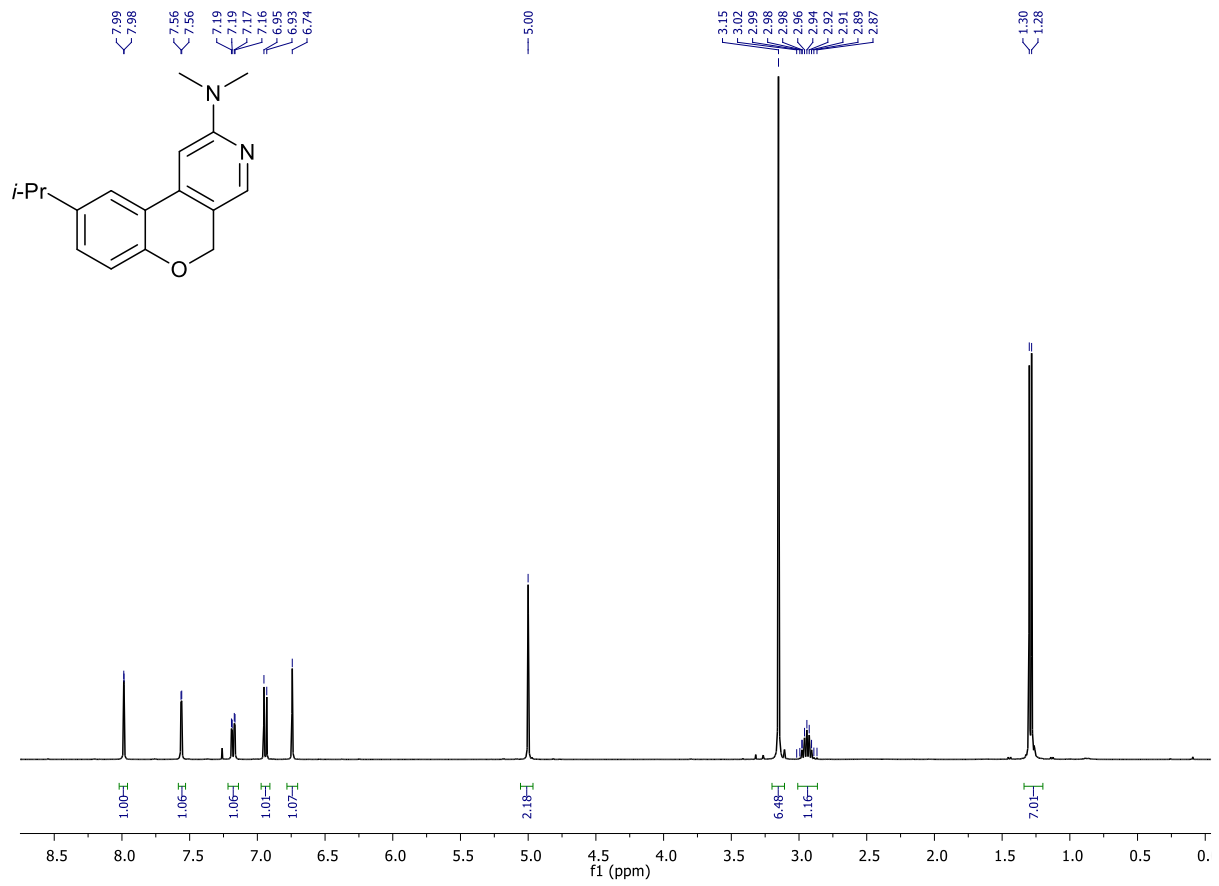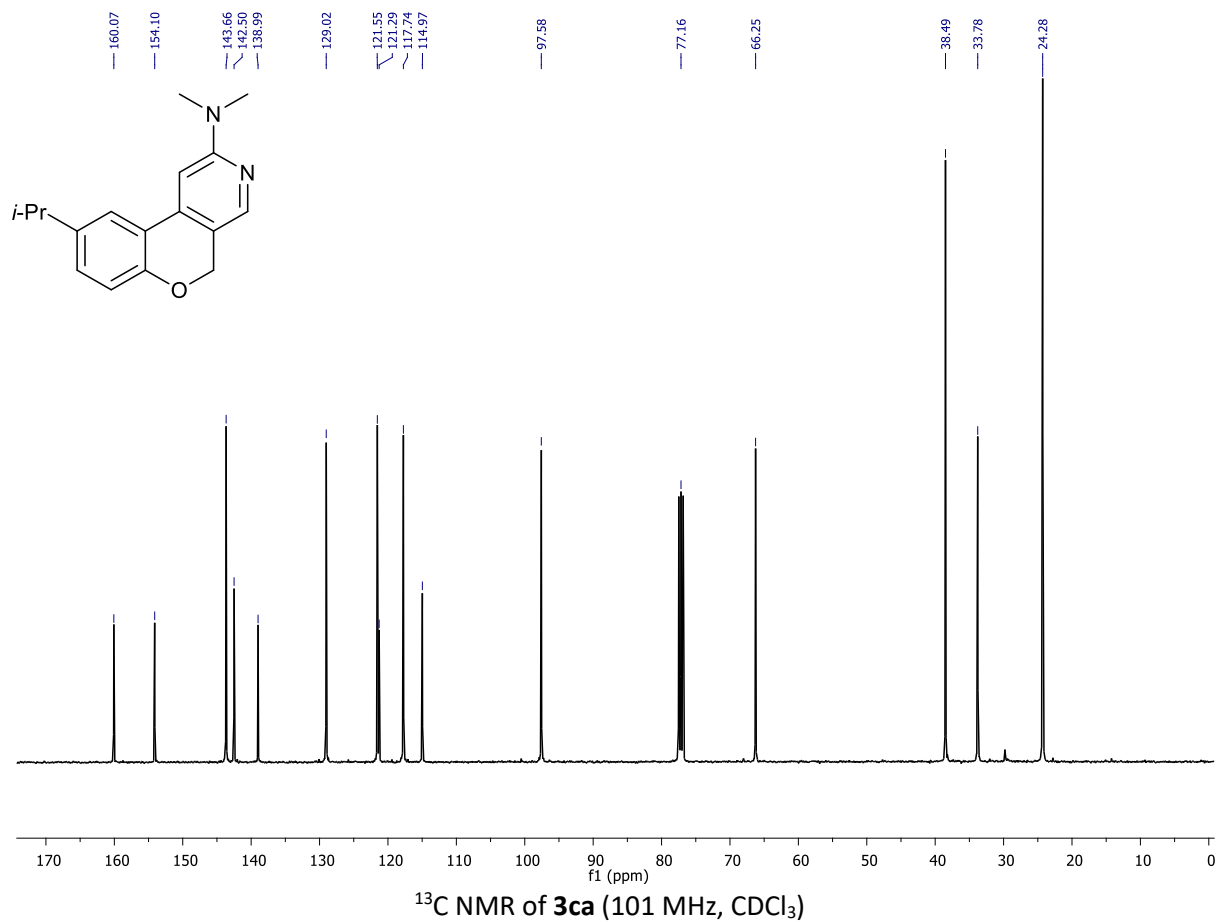



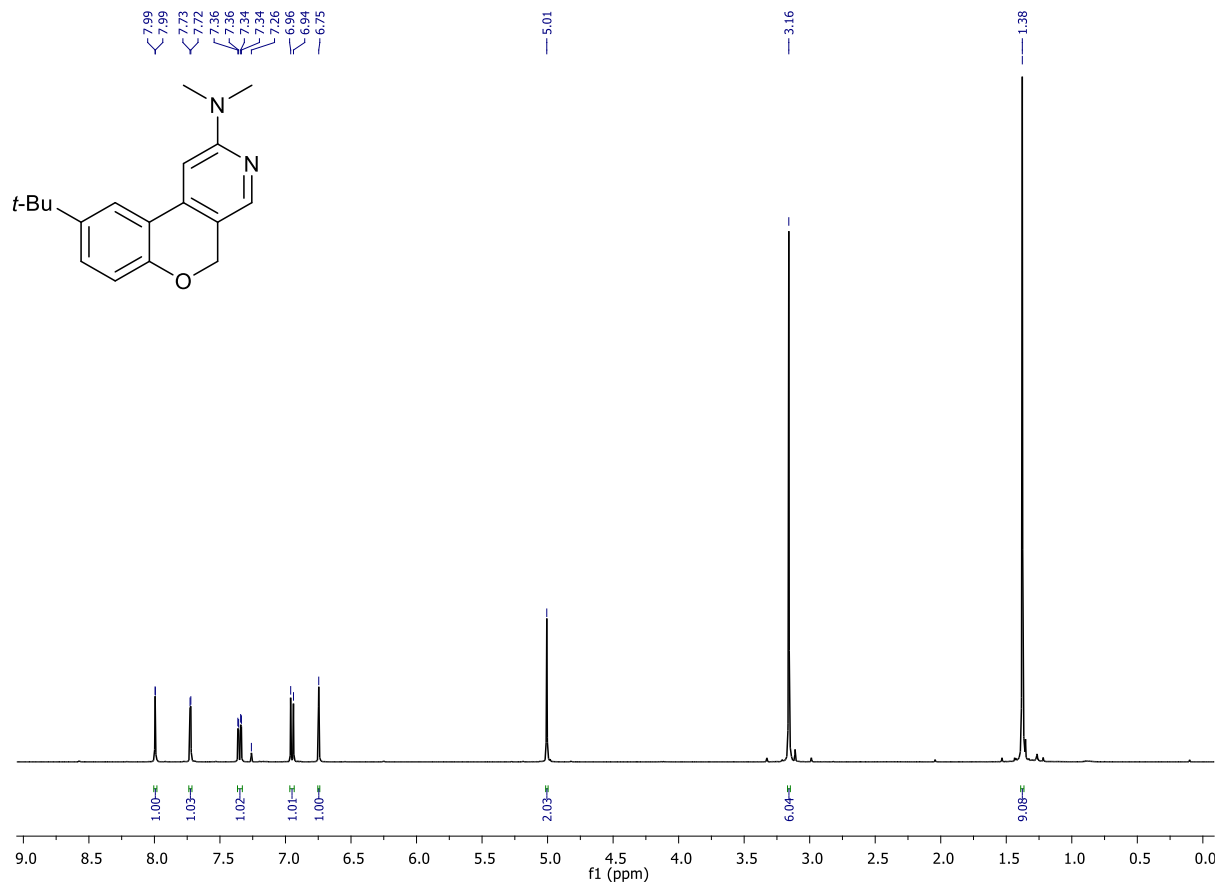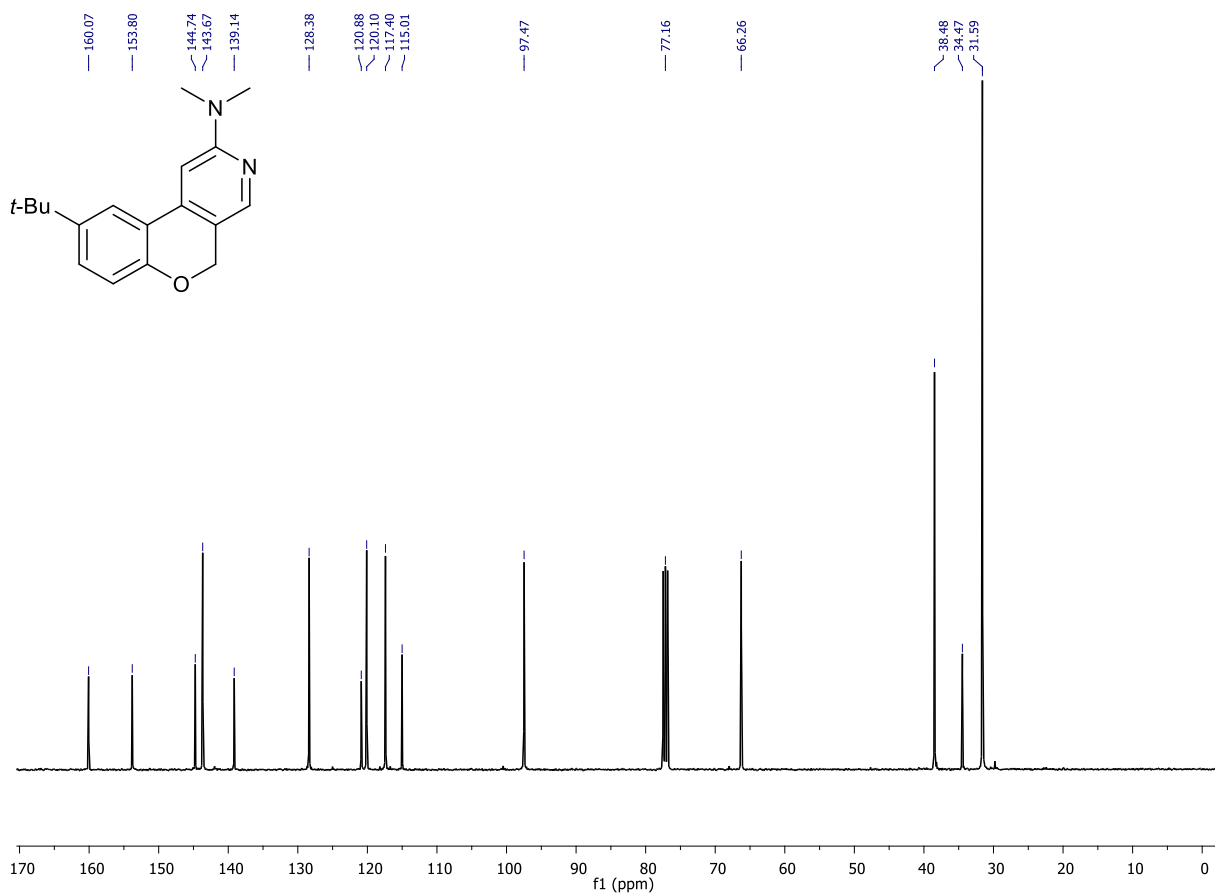

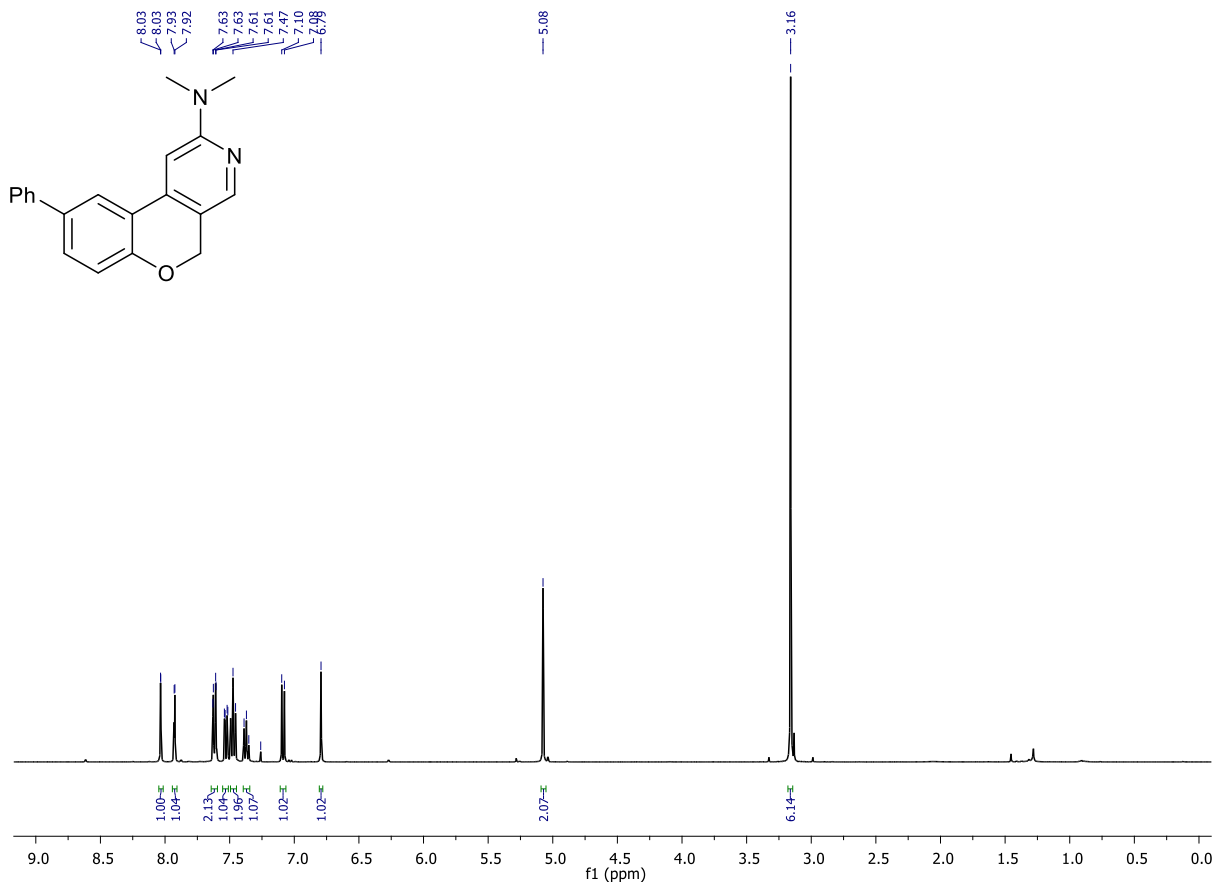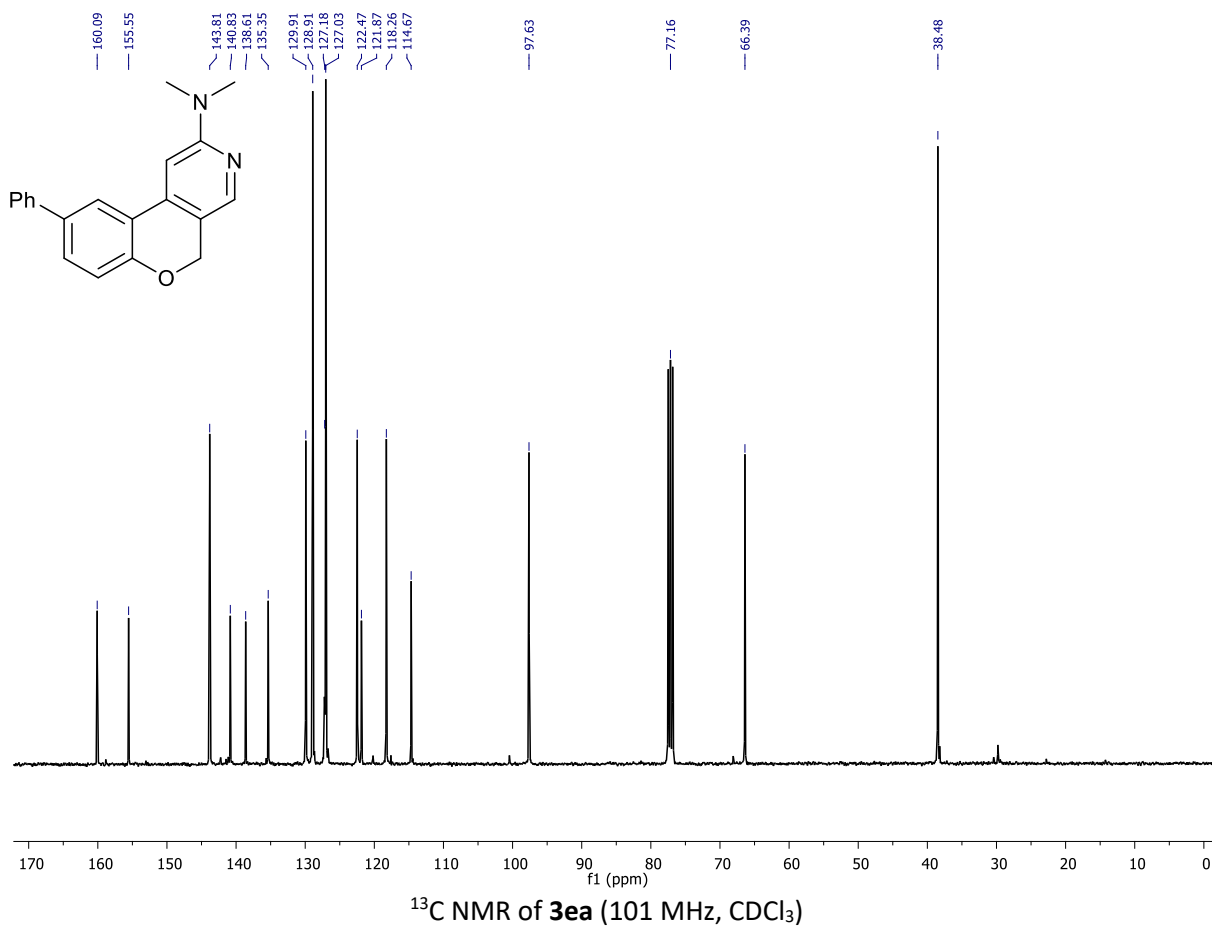

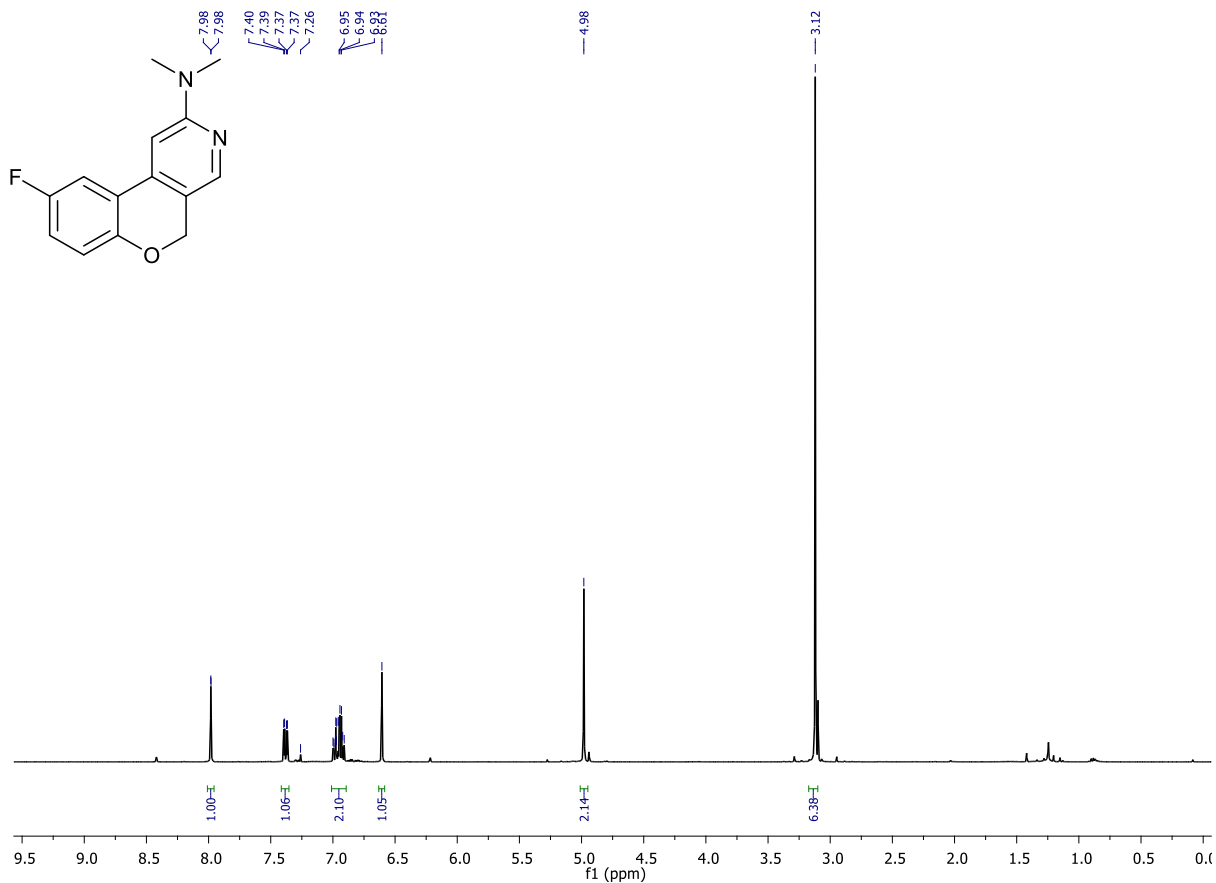

<sup>1</sup>H NMR of **3fa** (400 MHz, CDCl<sub>3</sub>)

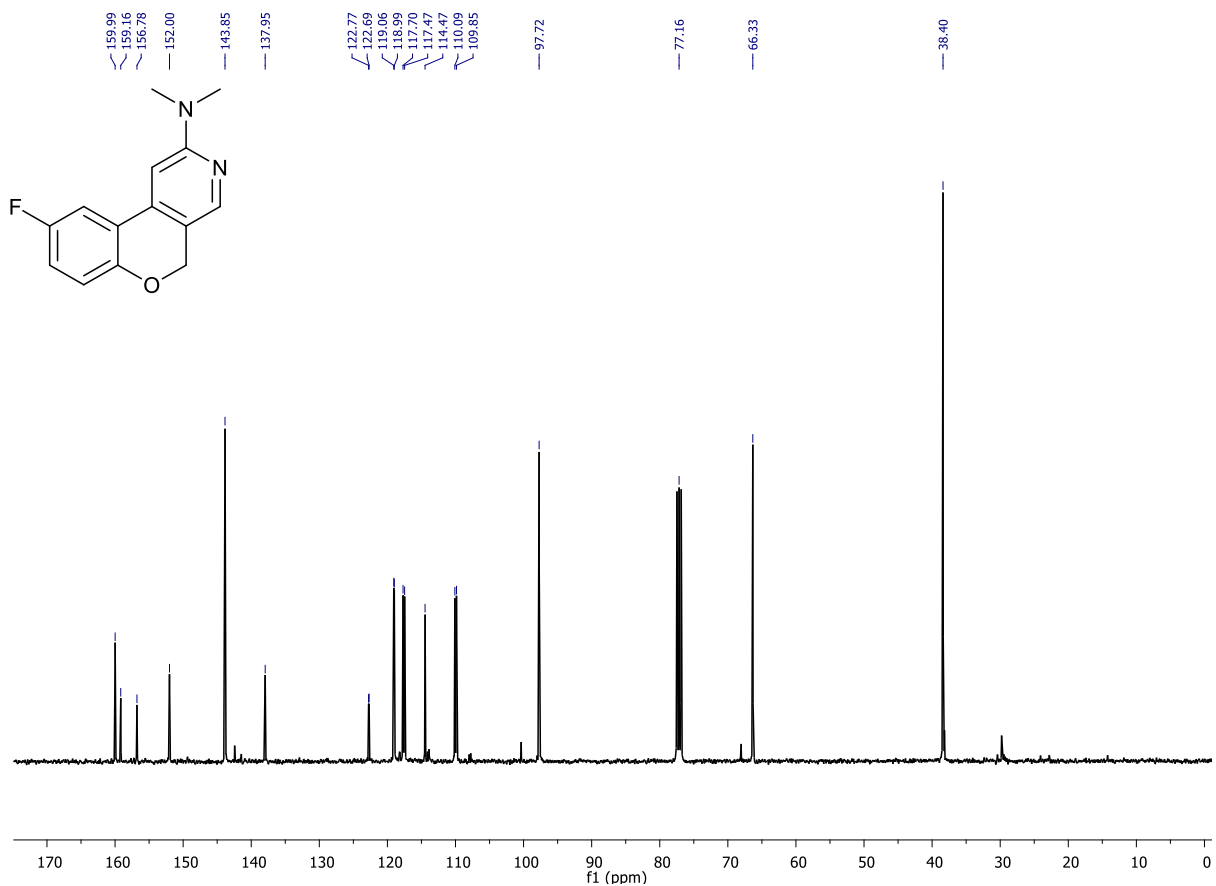

<sup>13</sup>C NMR of **3fa** (101 MHz, CDCl<sub>3</sub>)

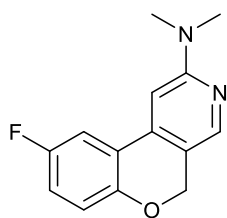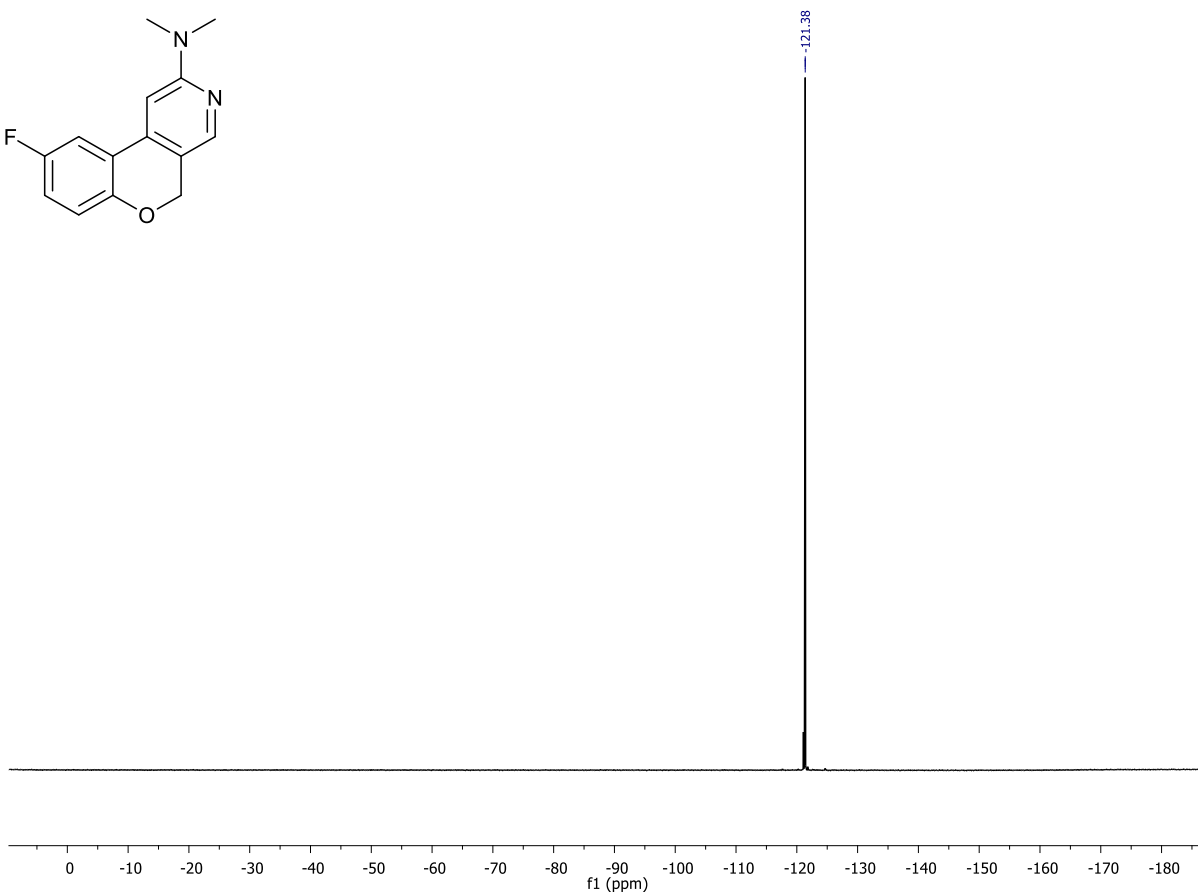

$^{19}\text{F}$  NMR of **3fa** (376.5 MHz,  $\text{CDCl}_3$ )

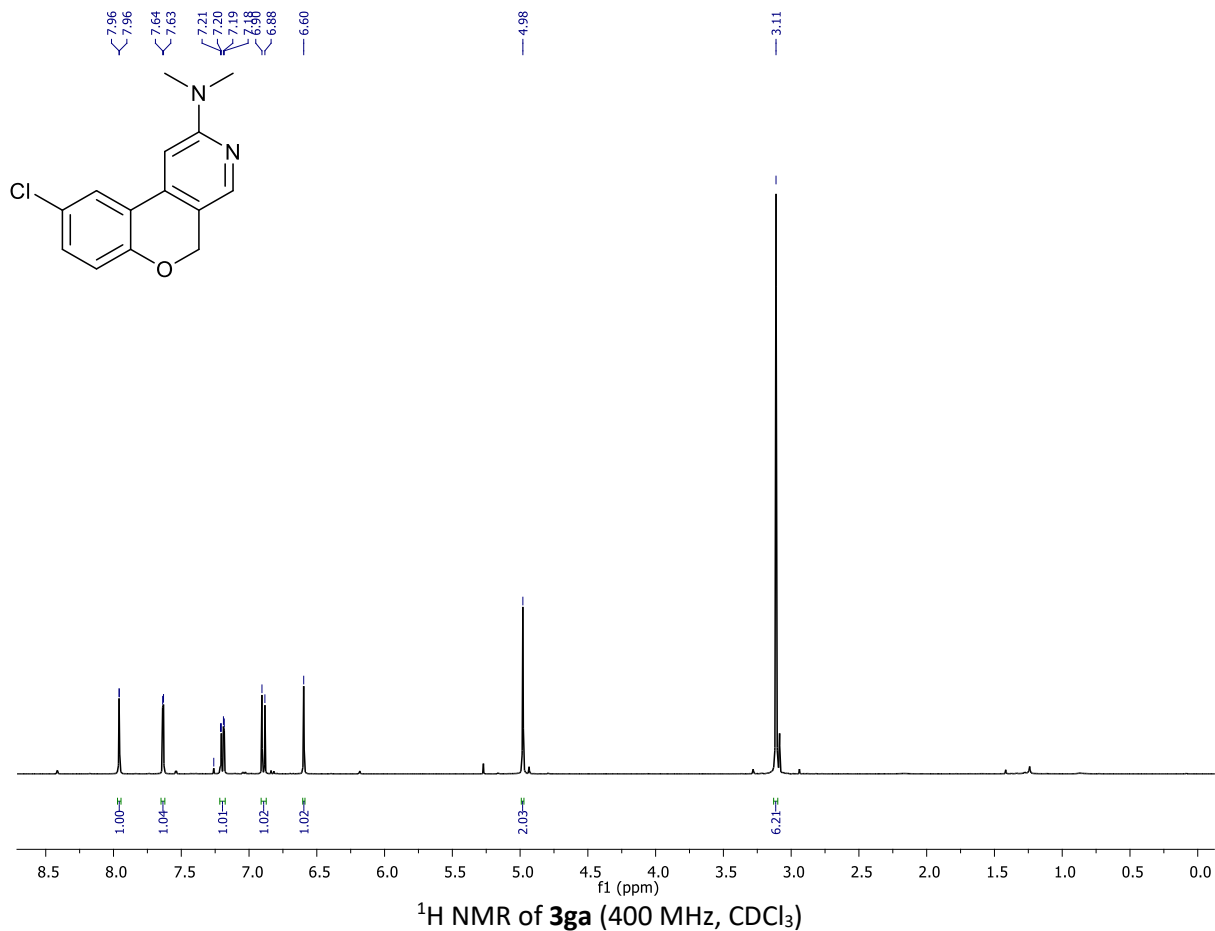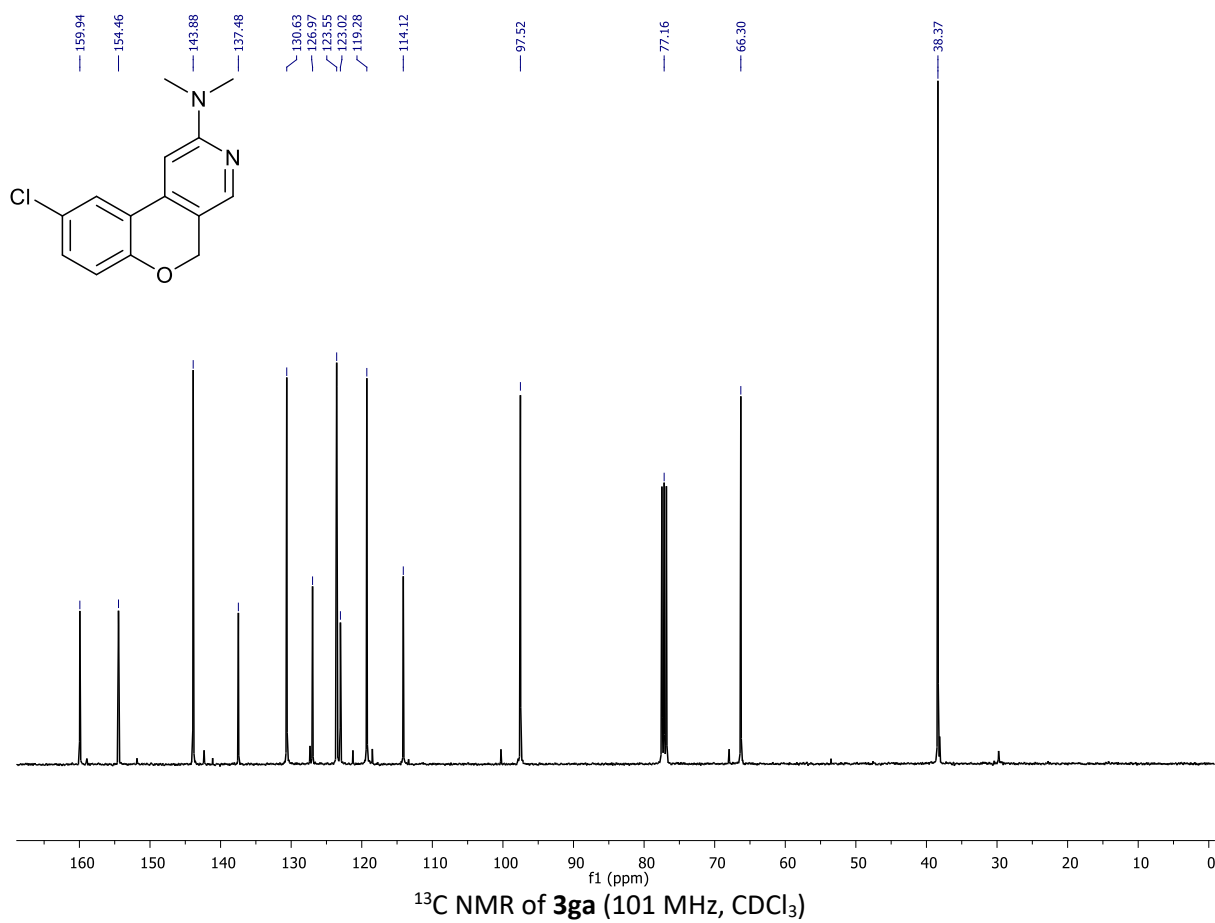

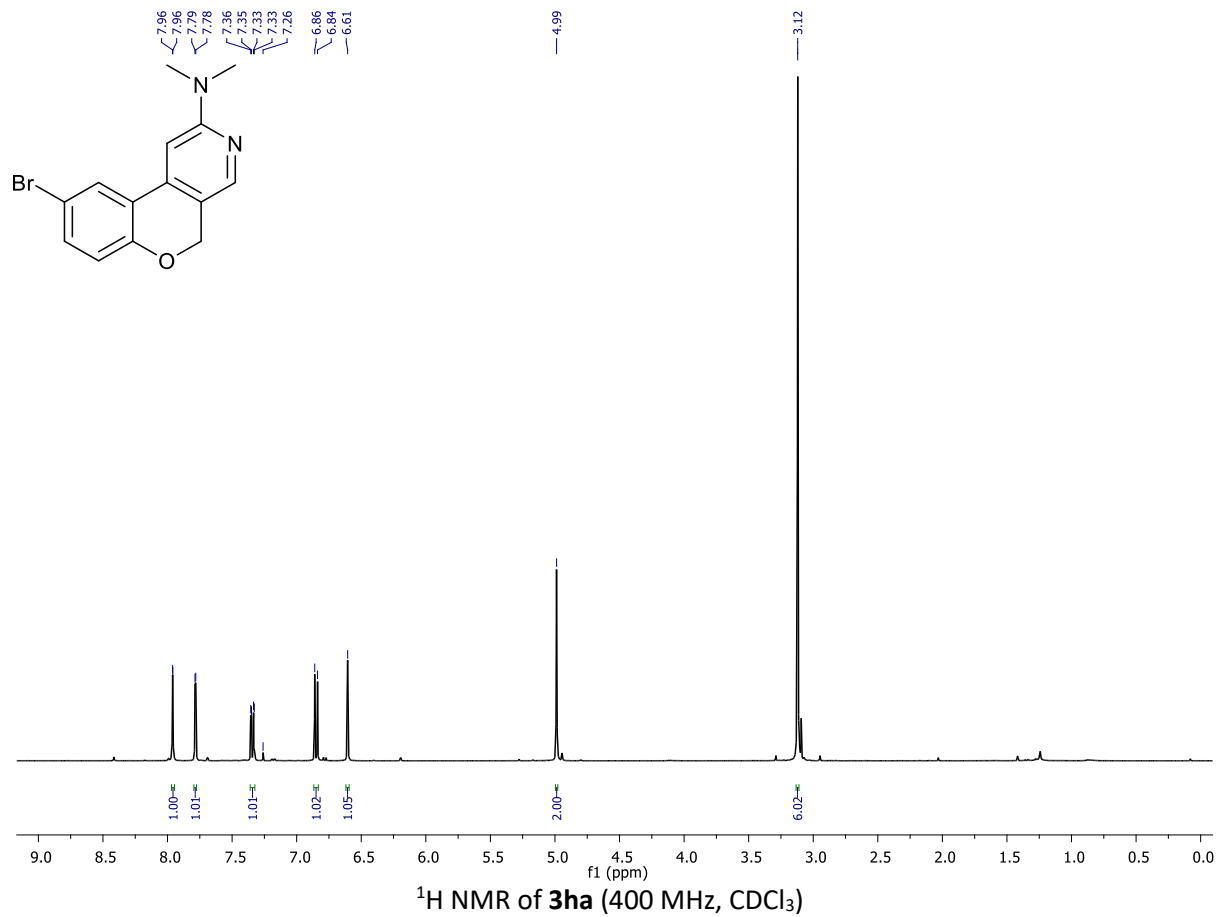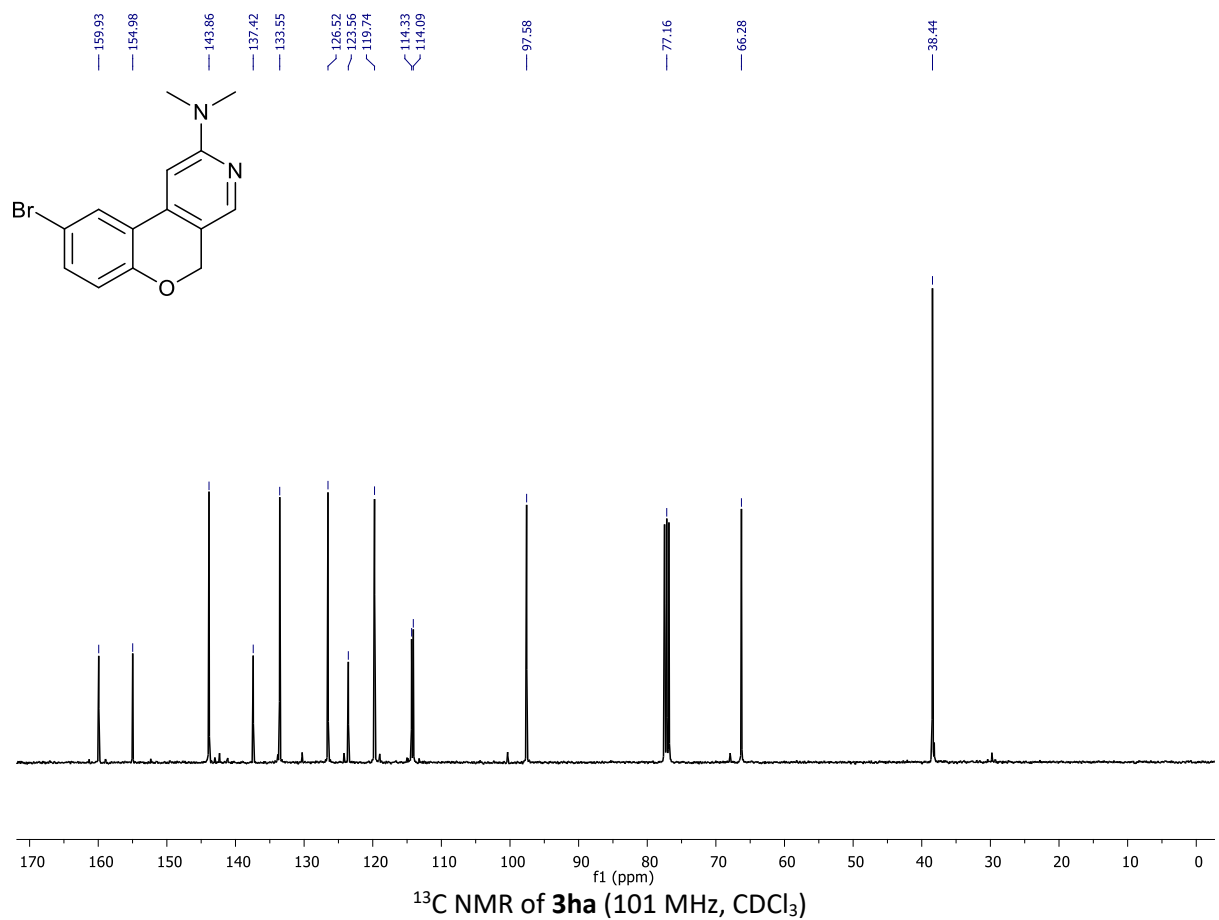

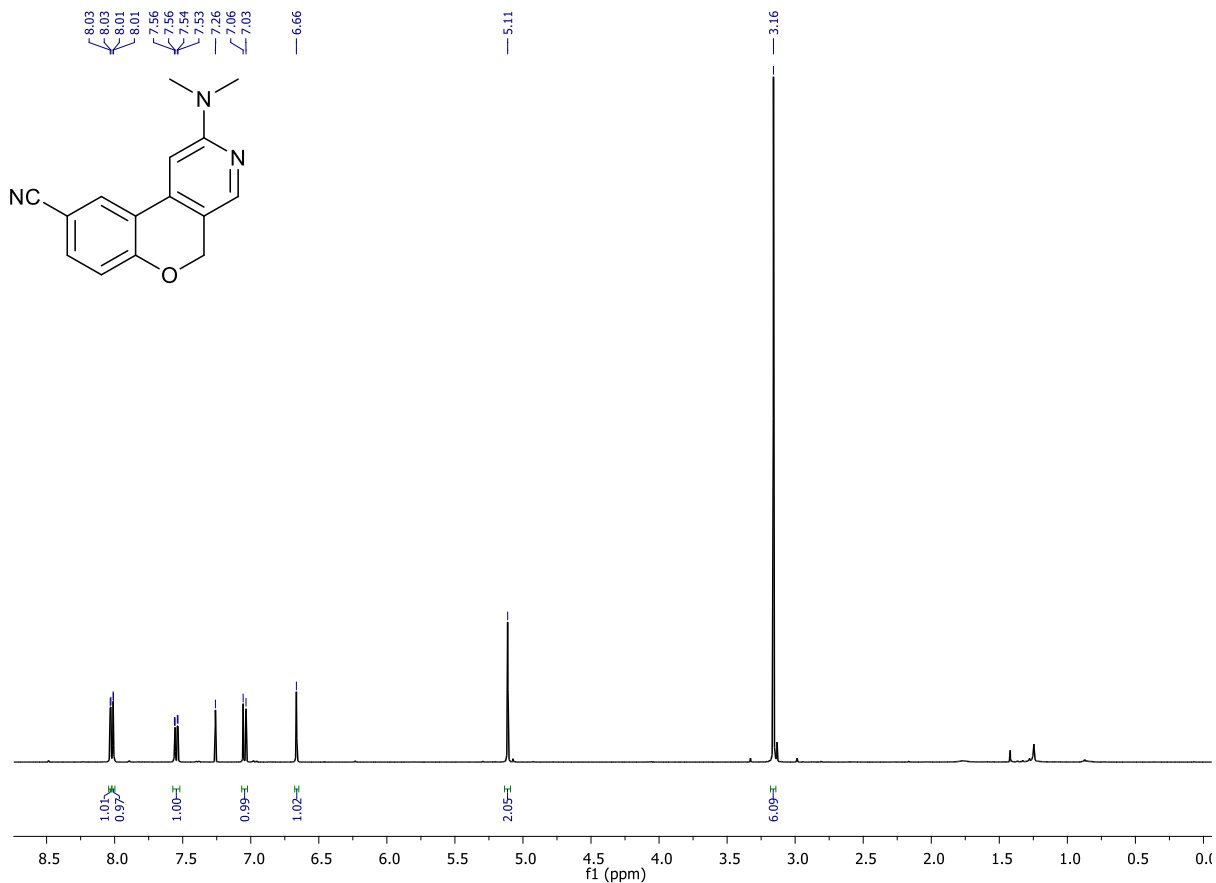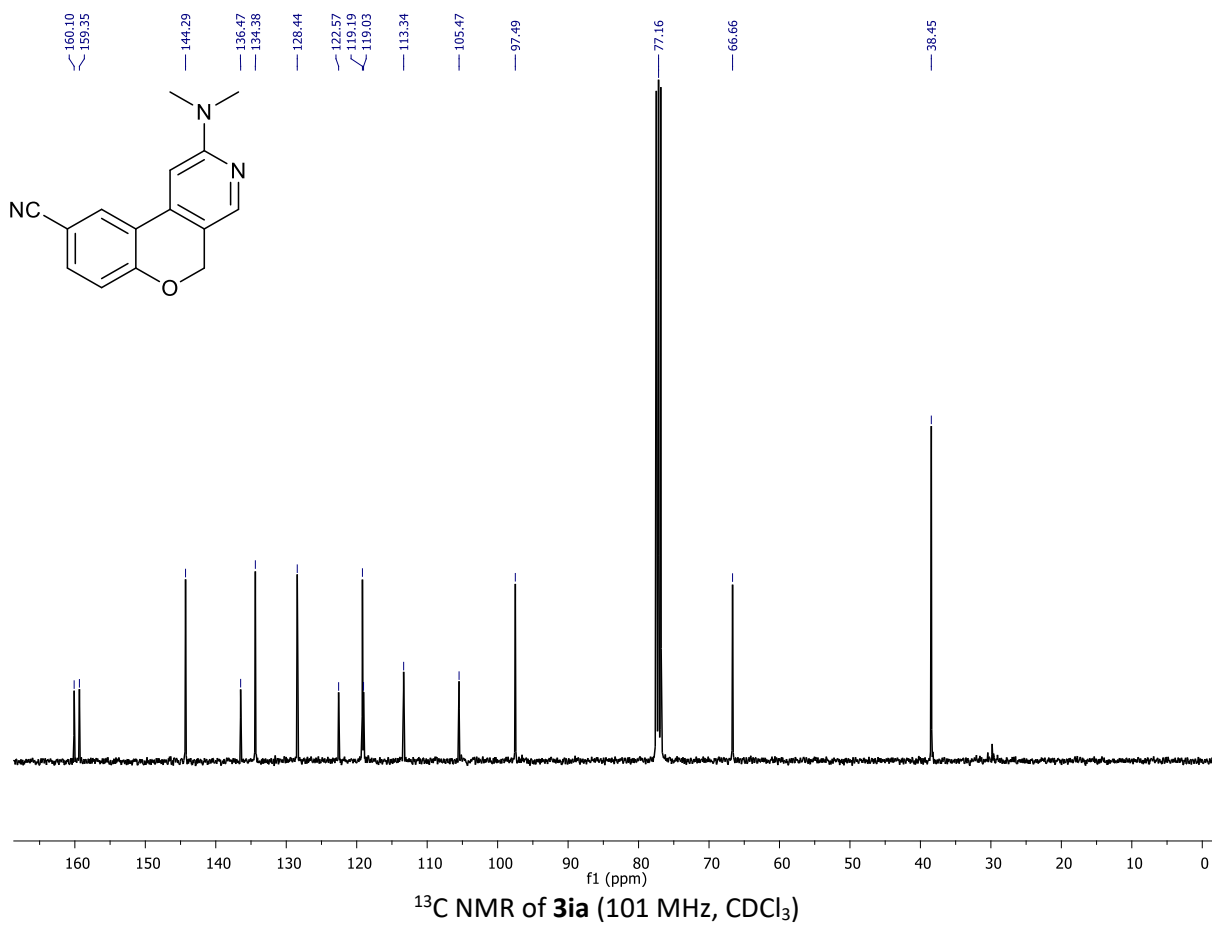

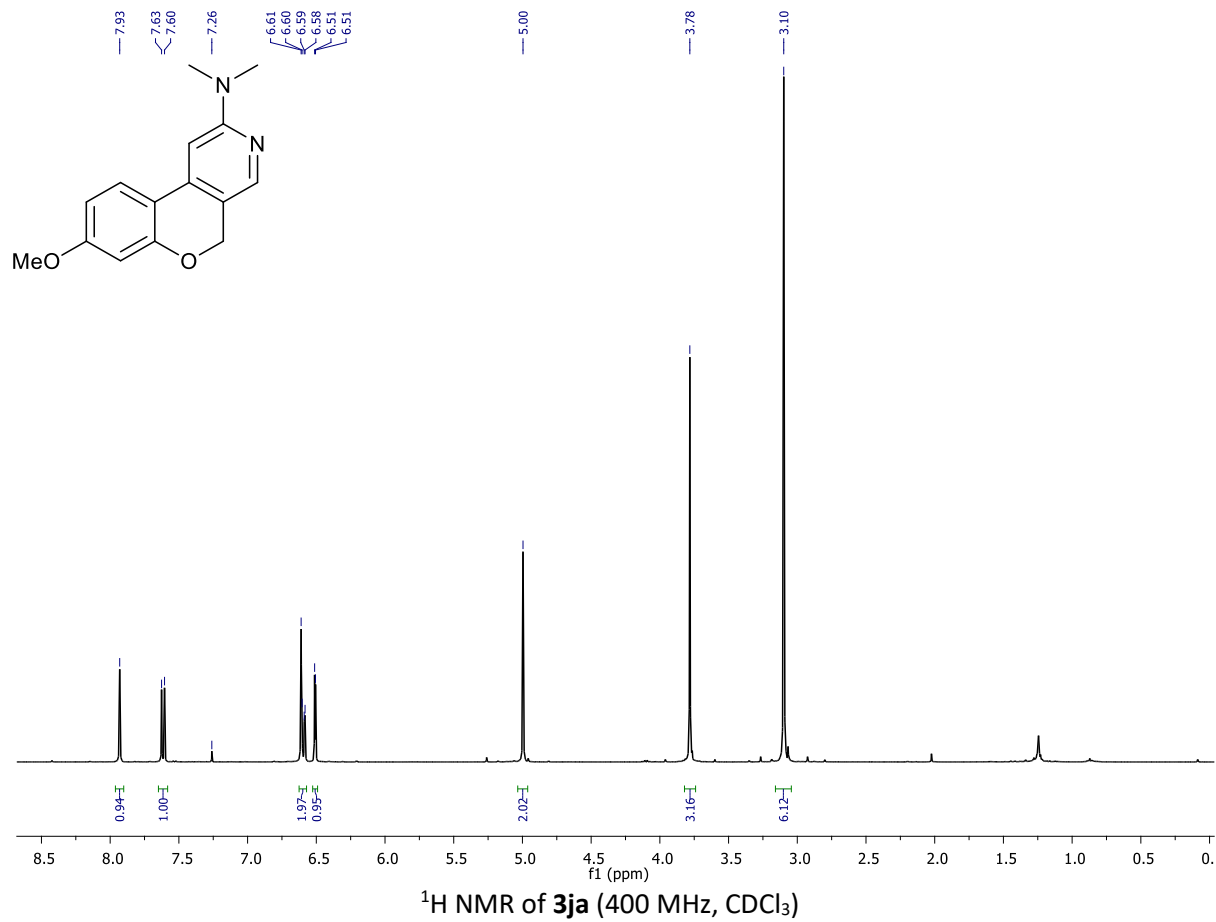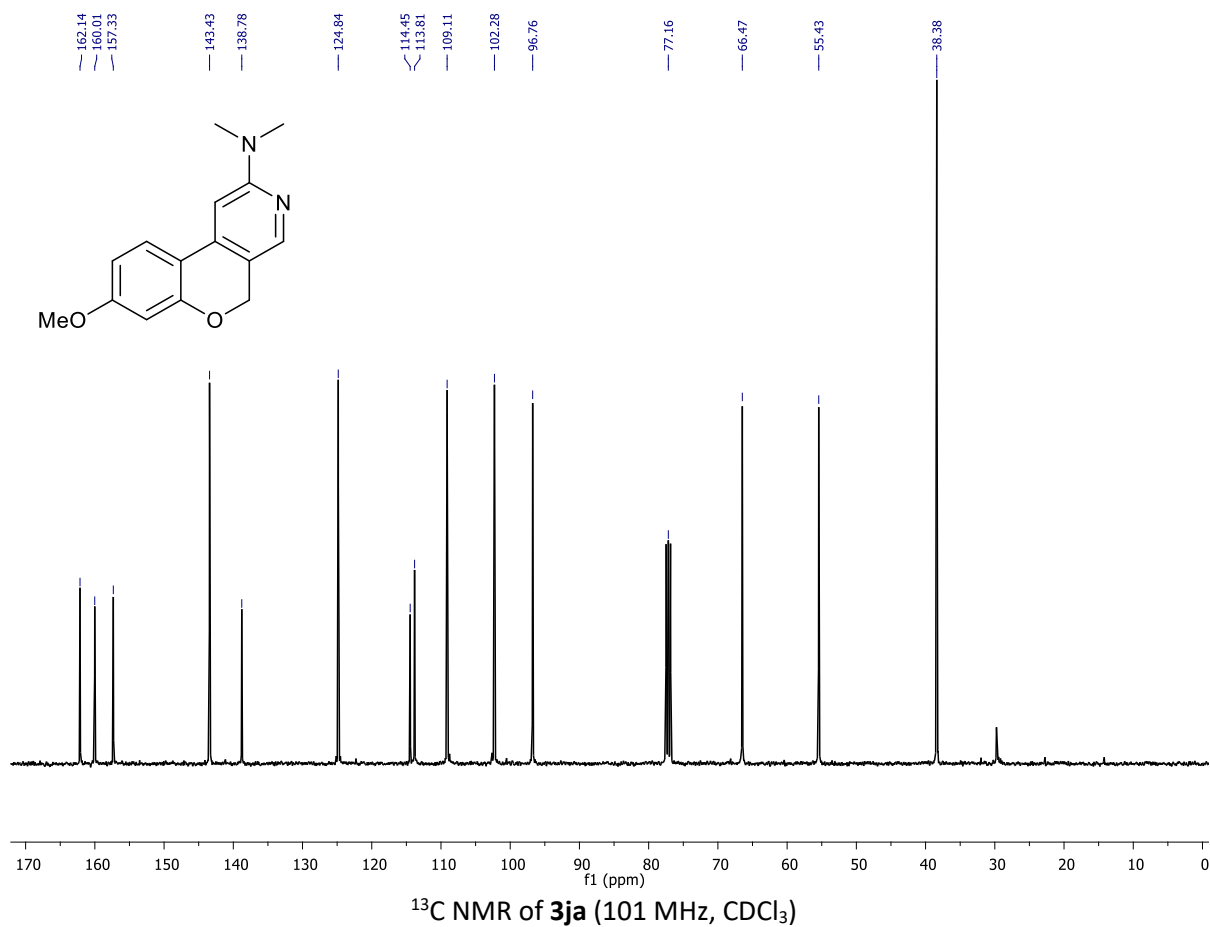



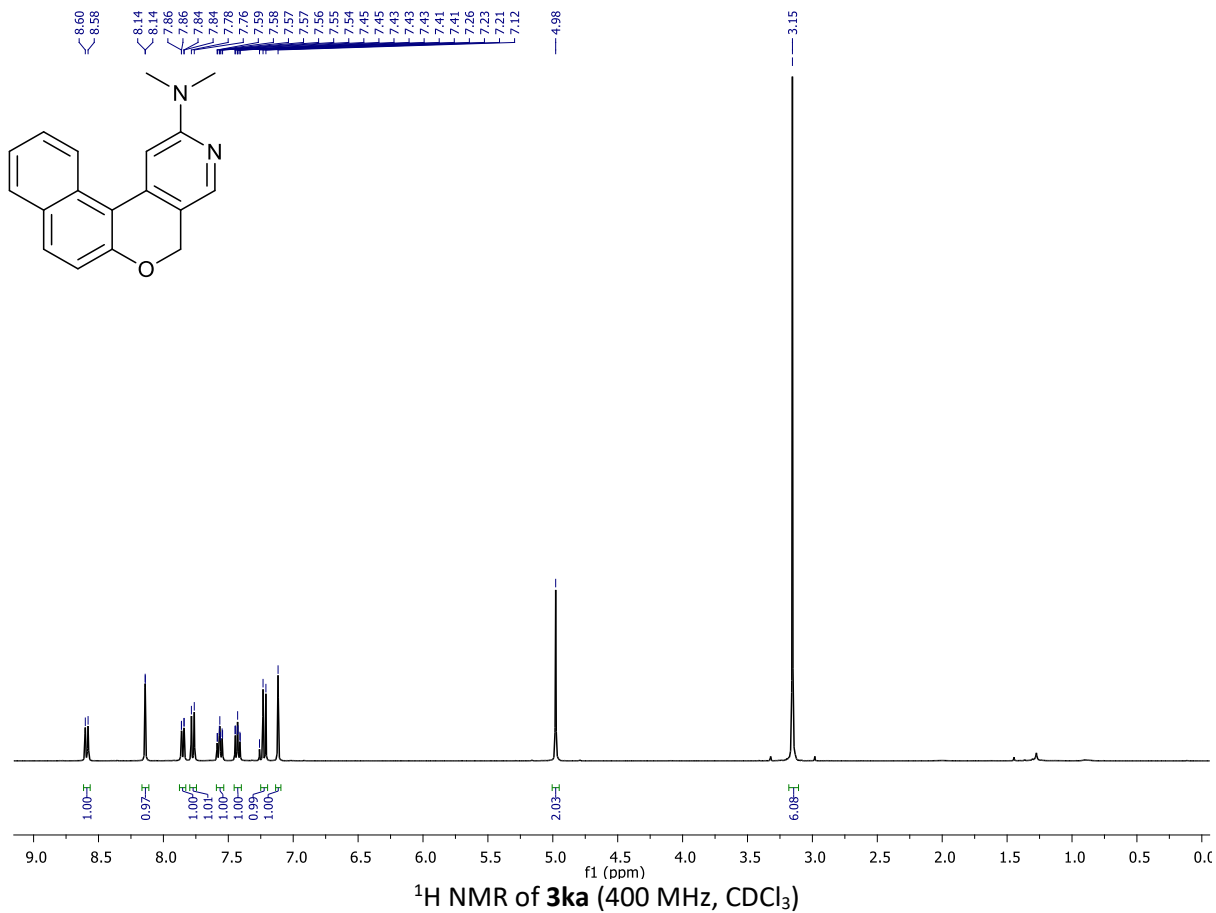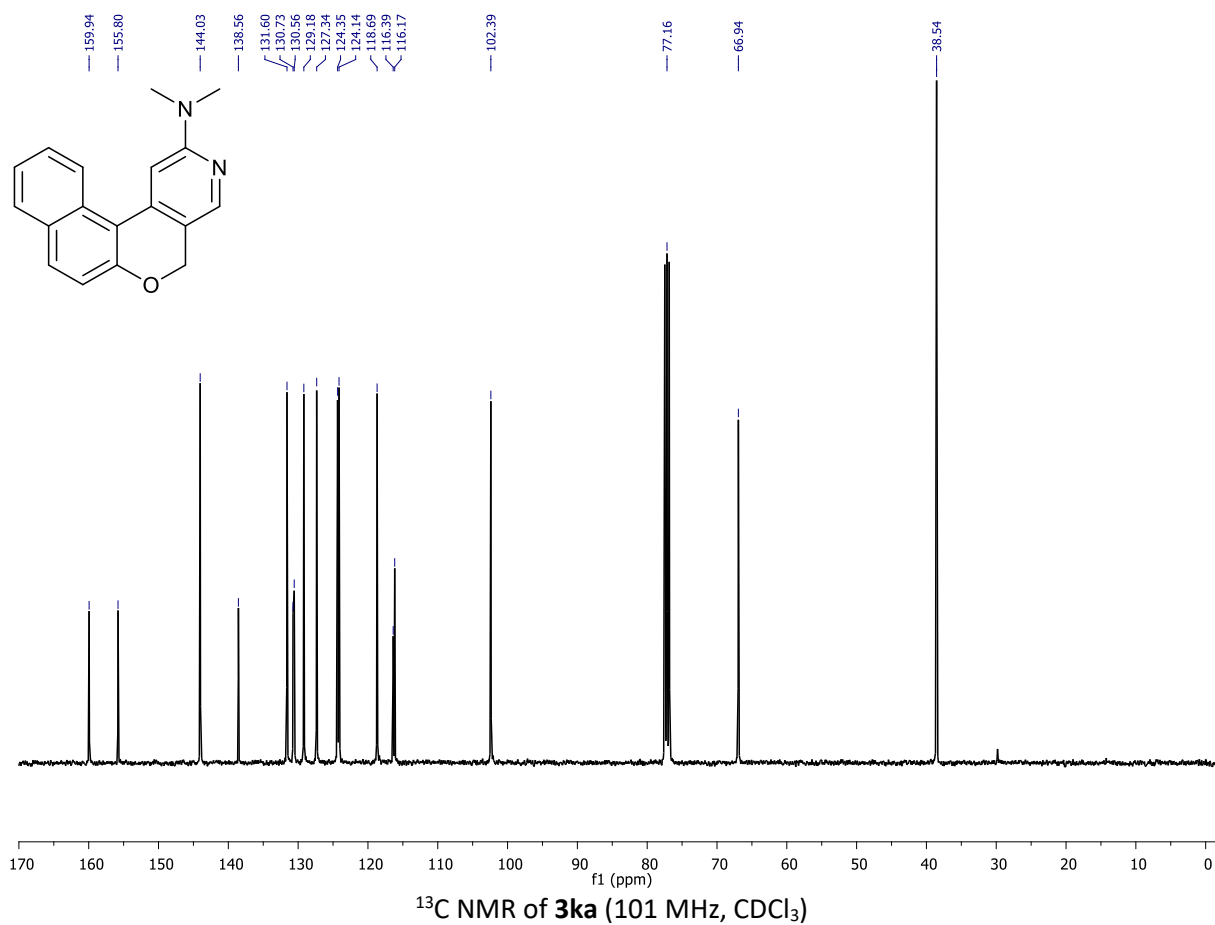

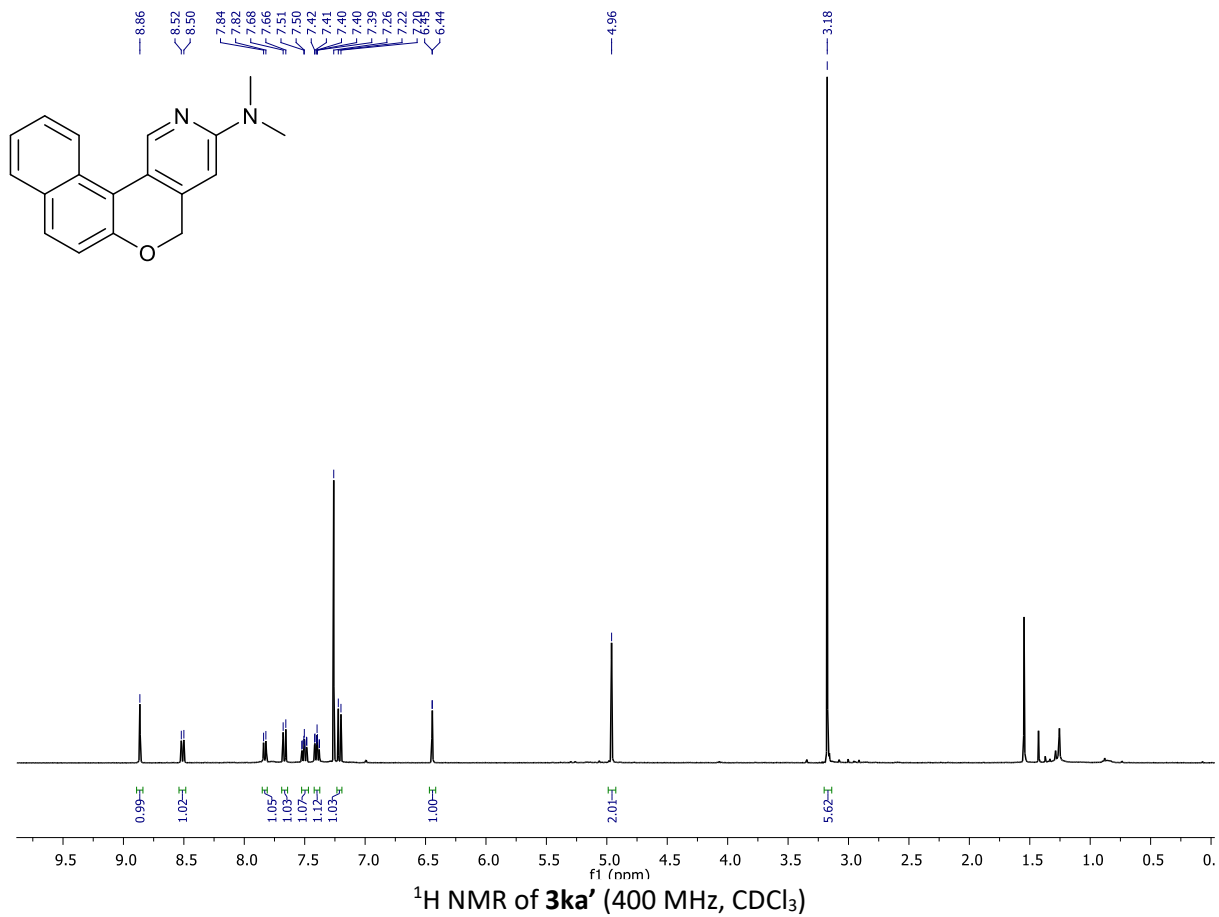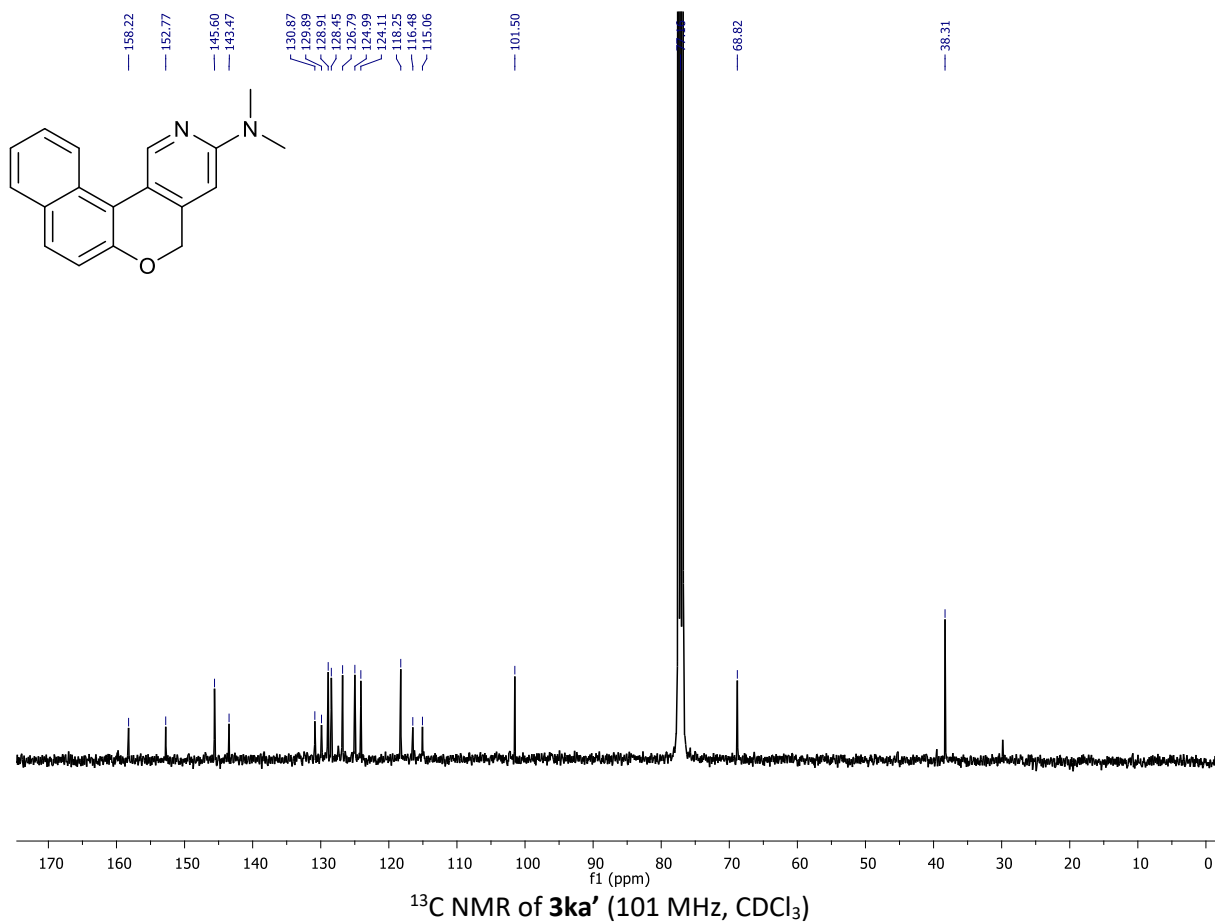

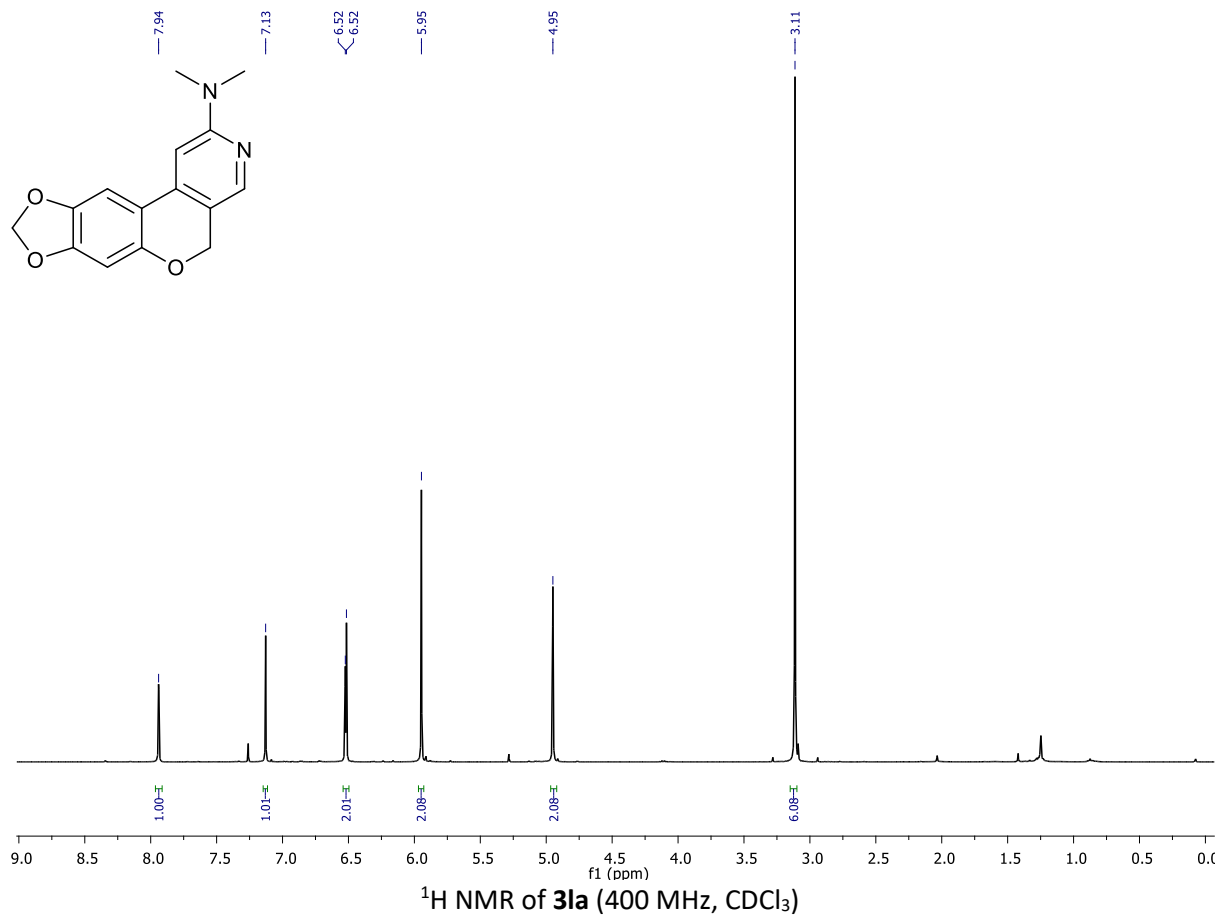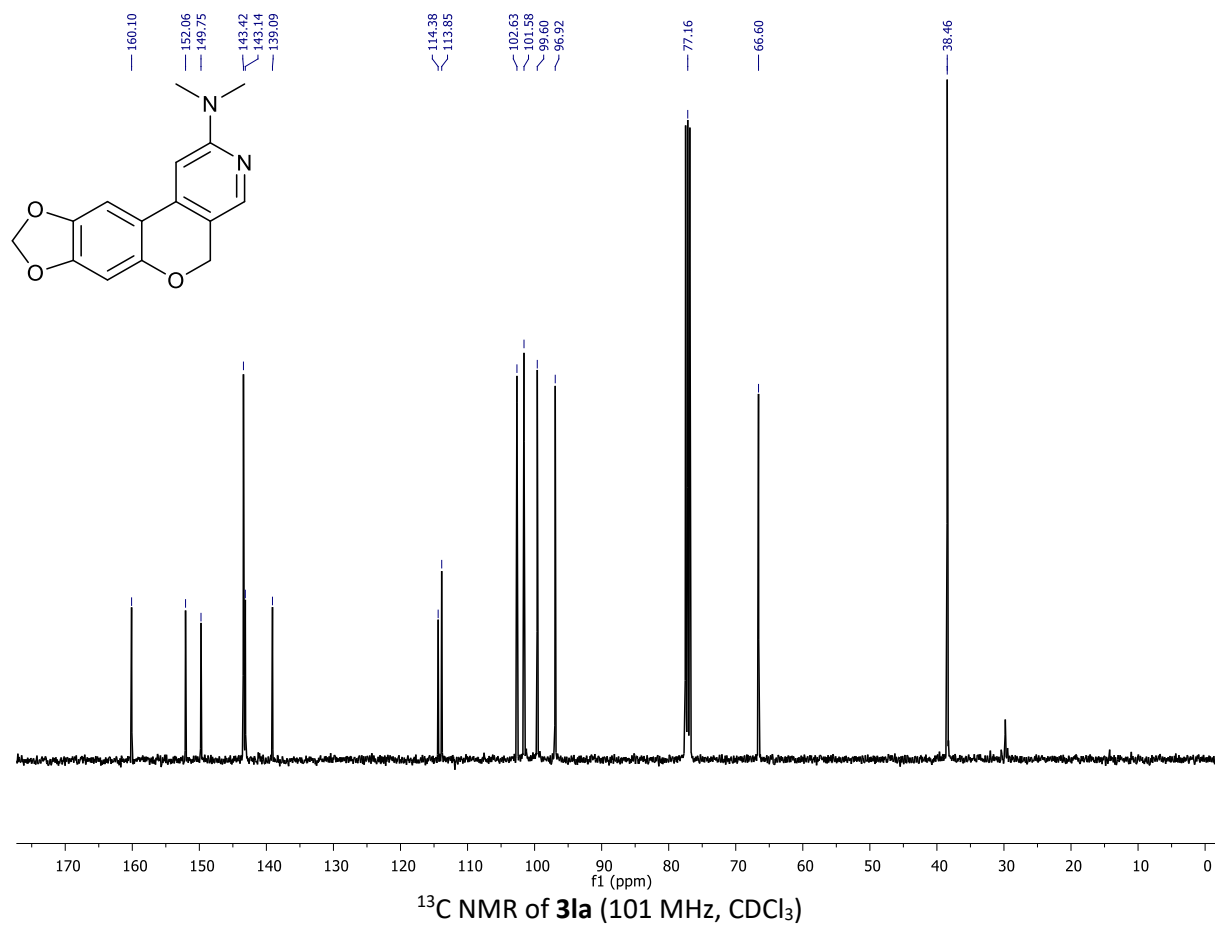

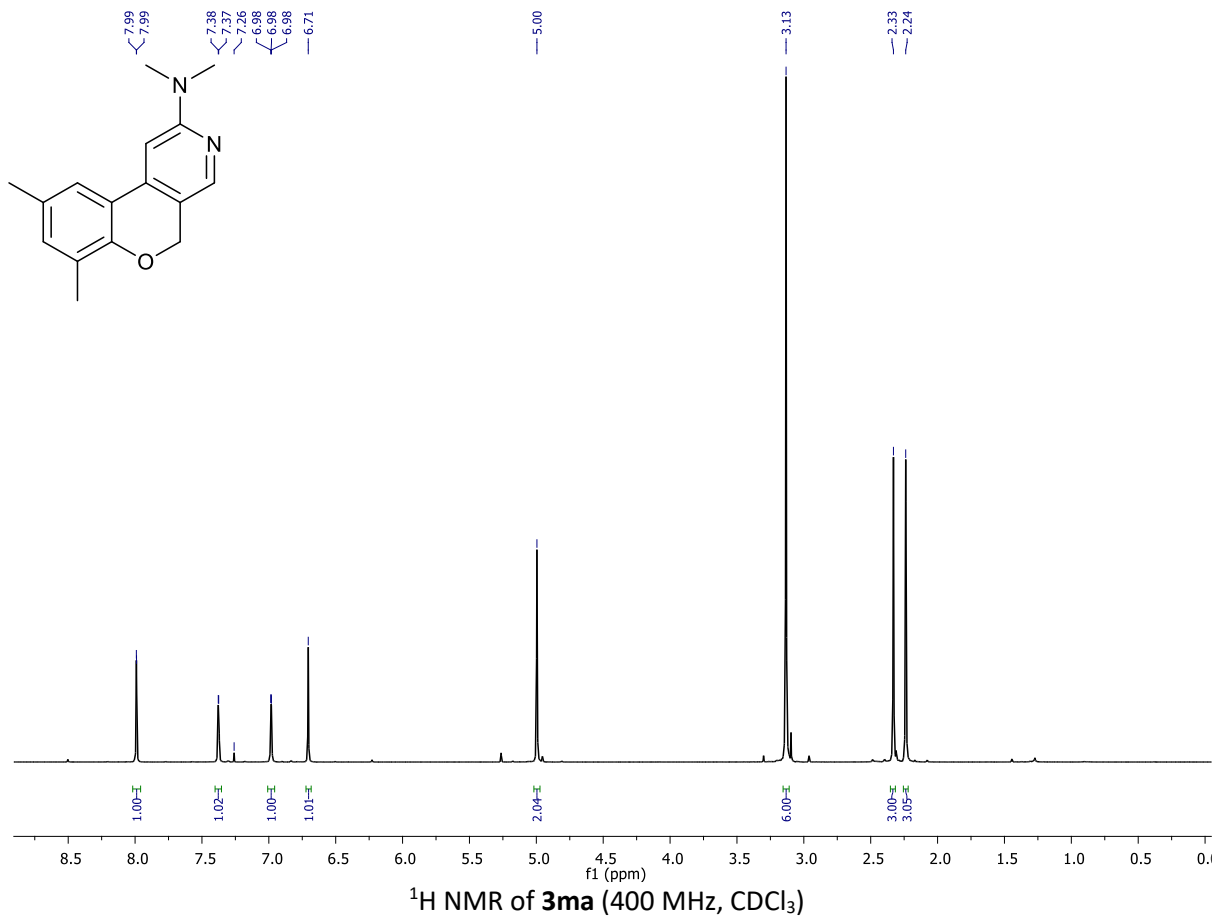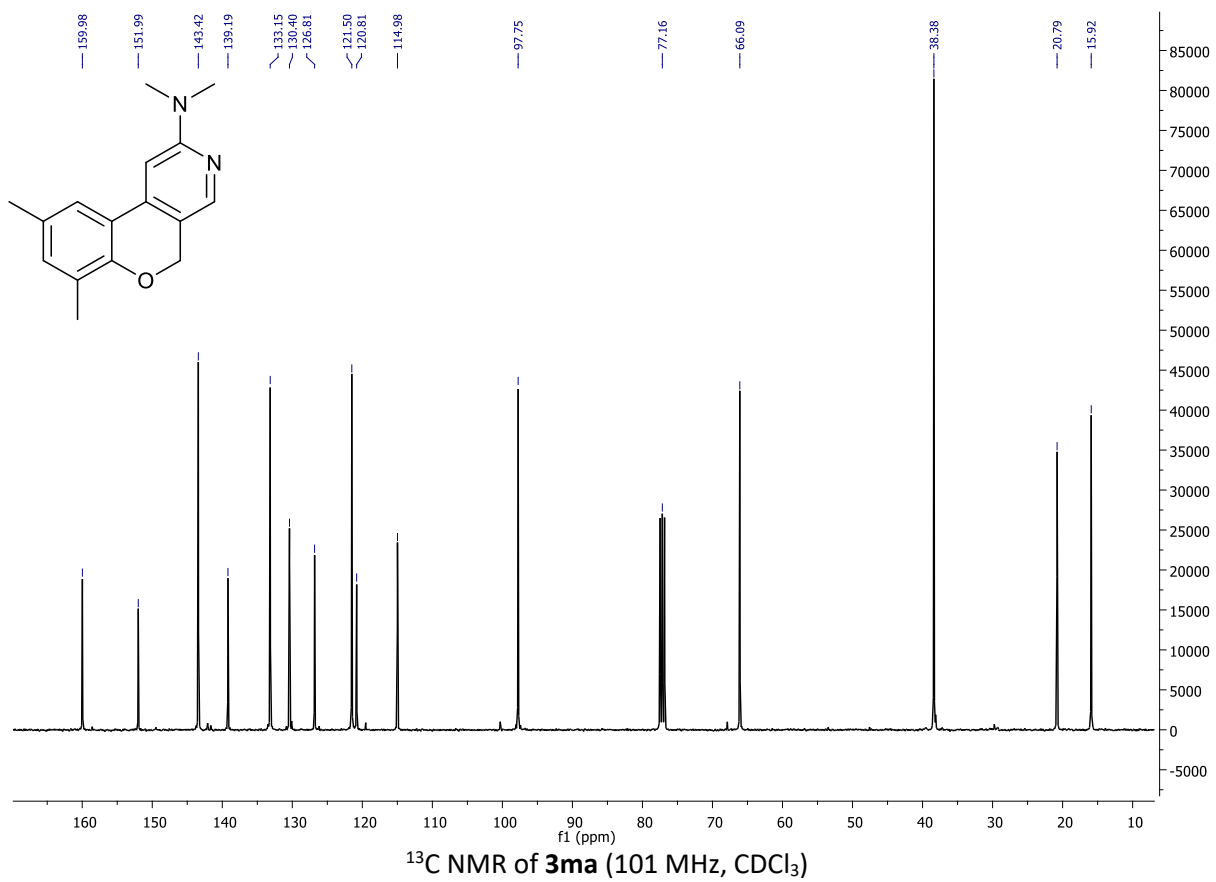

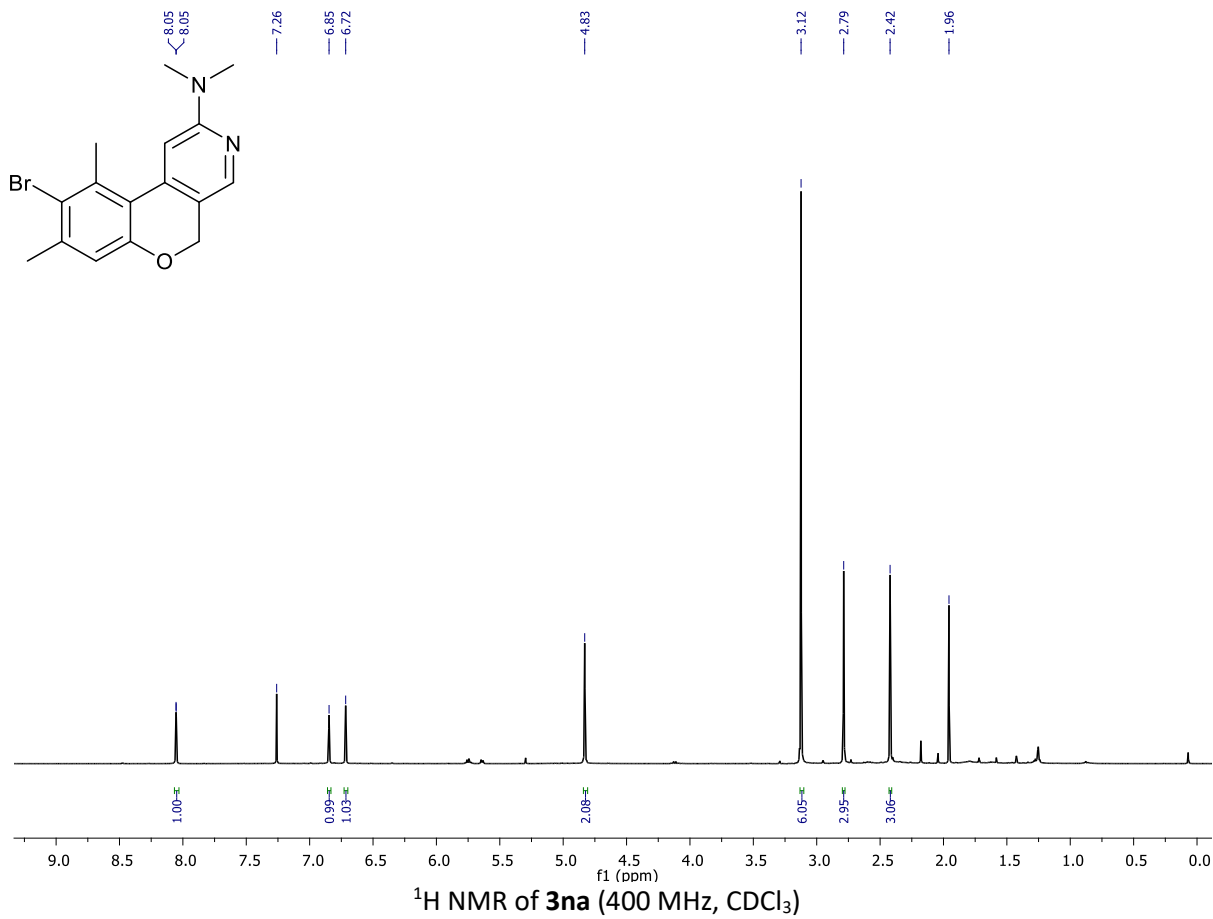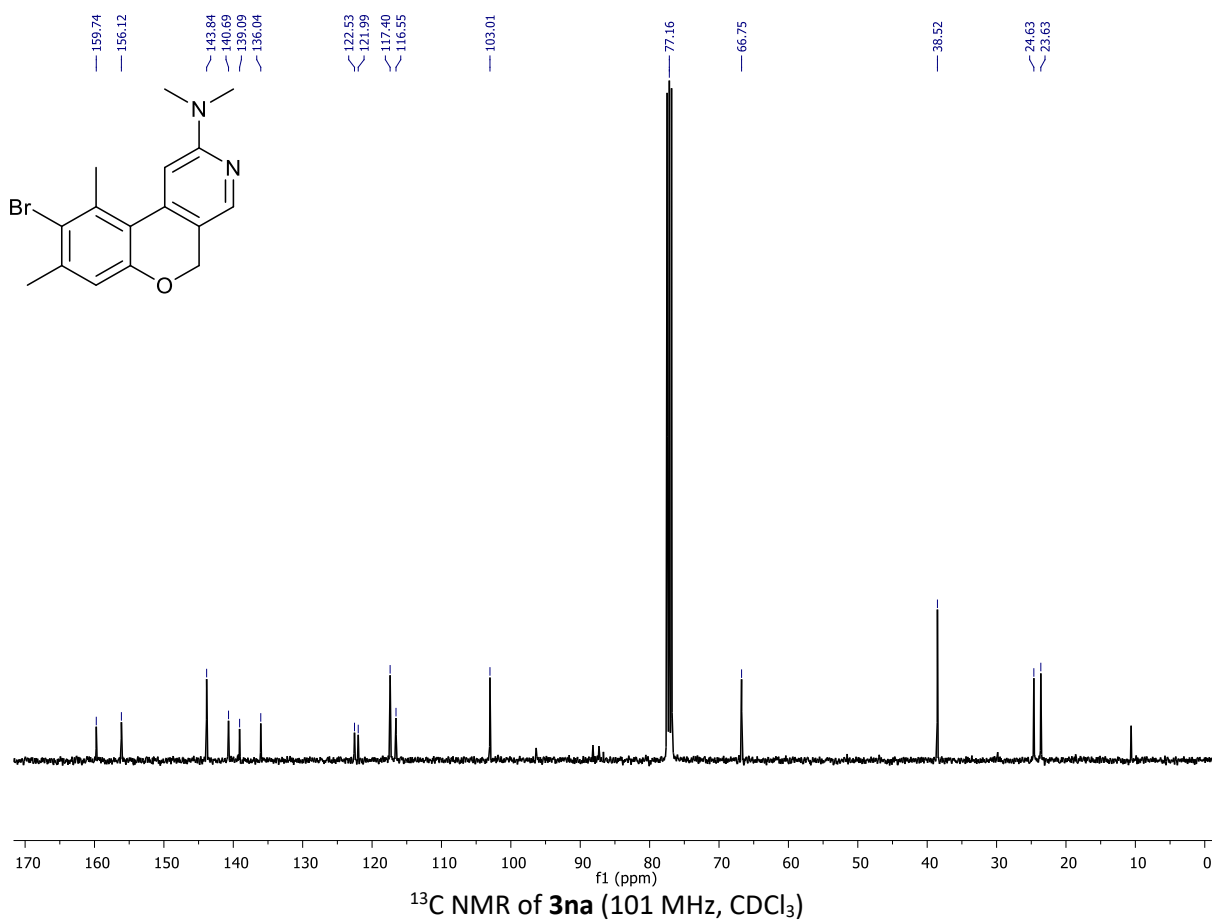

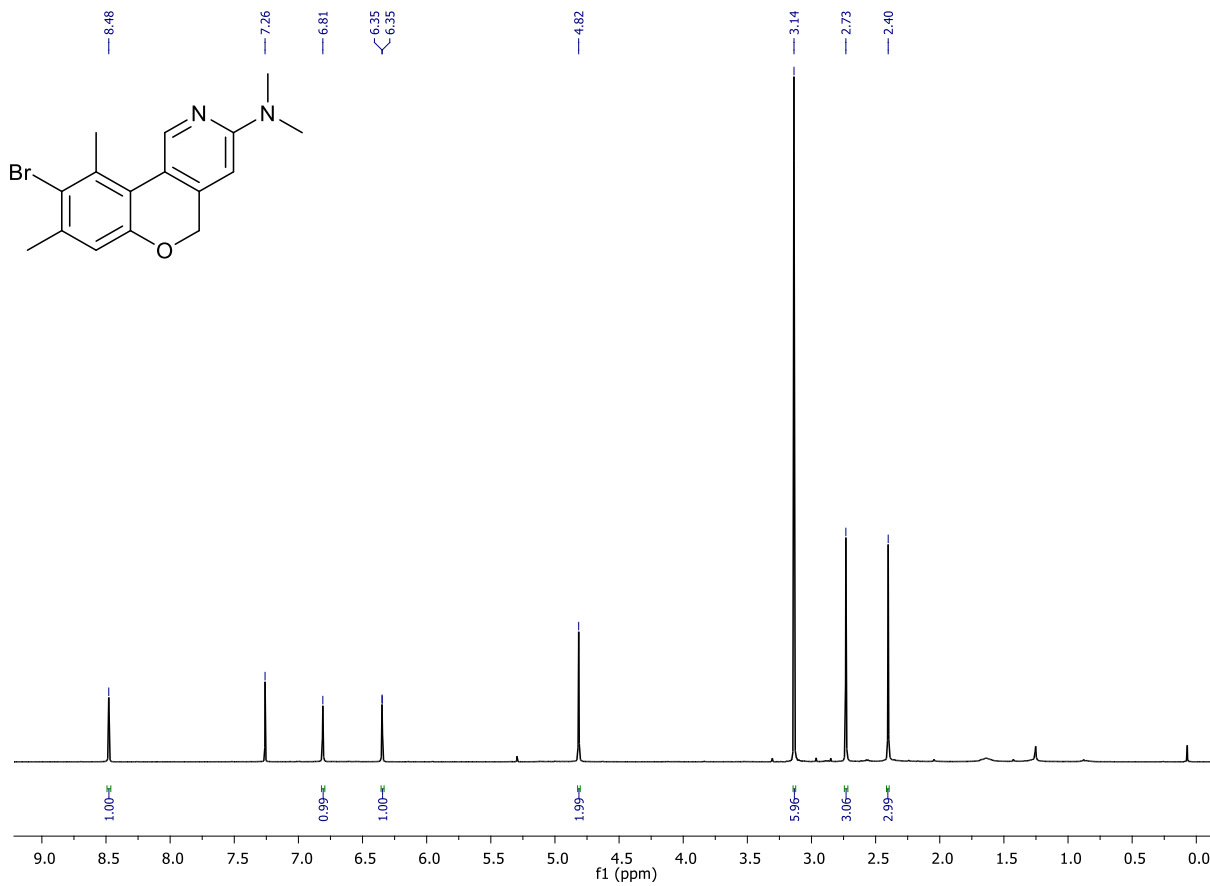

<sup>1</sup>H NMR of **3na'** (400 MHz, CDCl<sub>3</sub>)

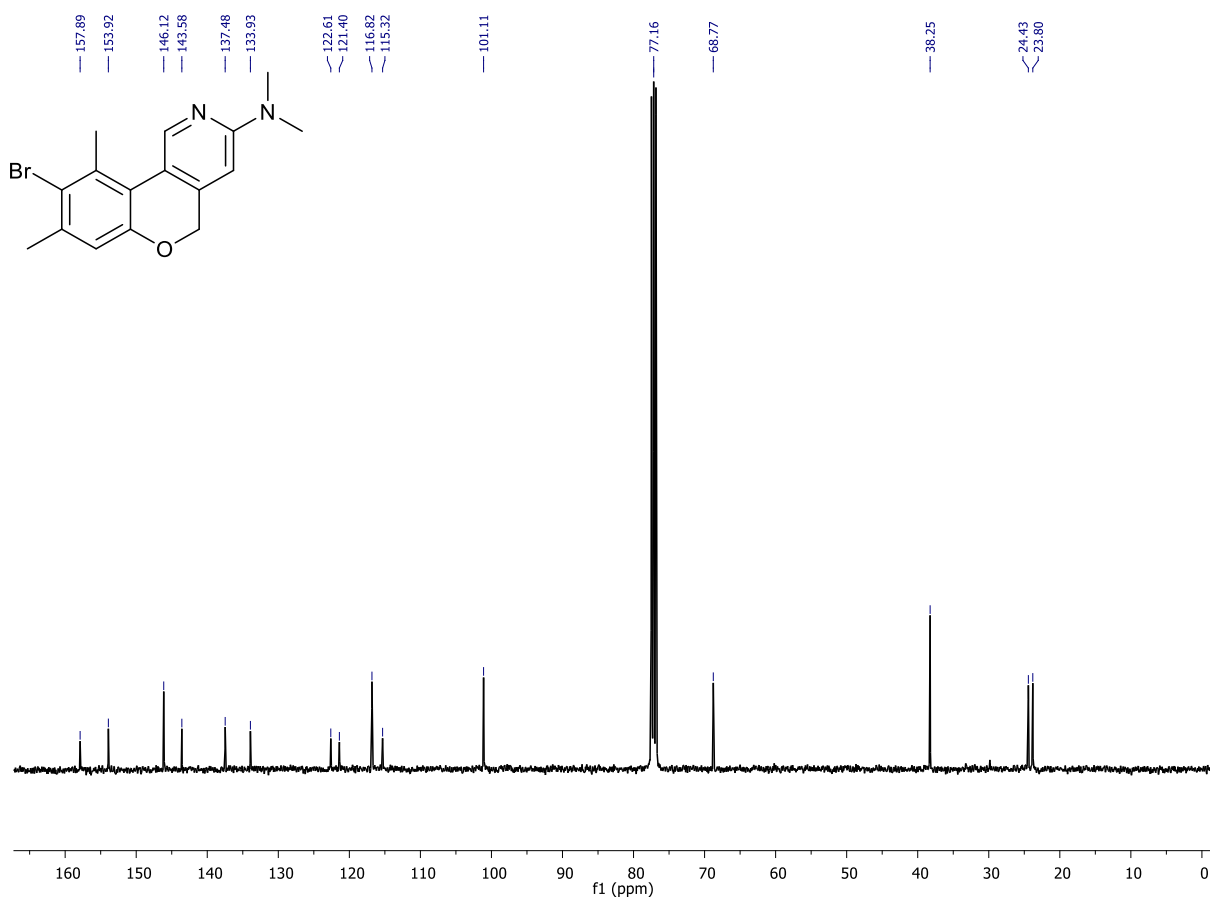

<sup>13</sup>C NMR of **3na'** (101 MHz, CDCl<sub>3</sub>)

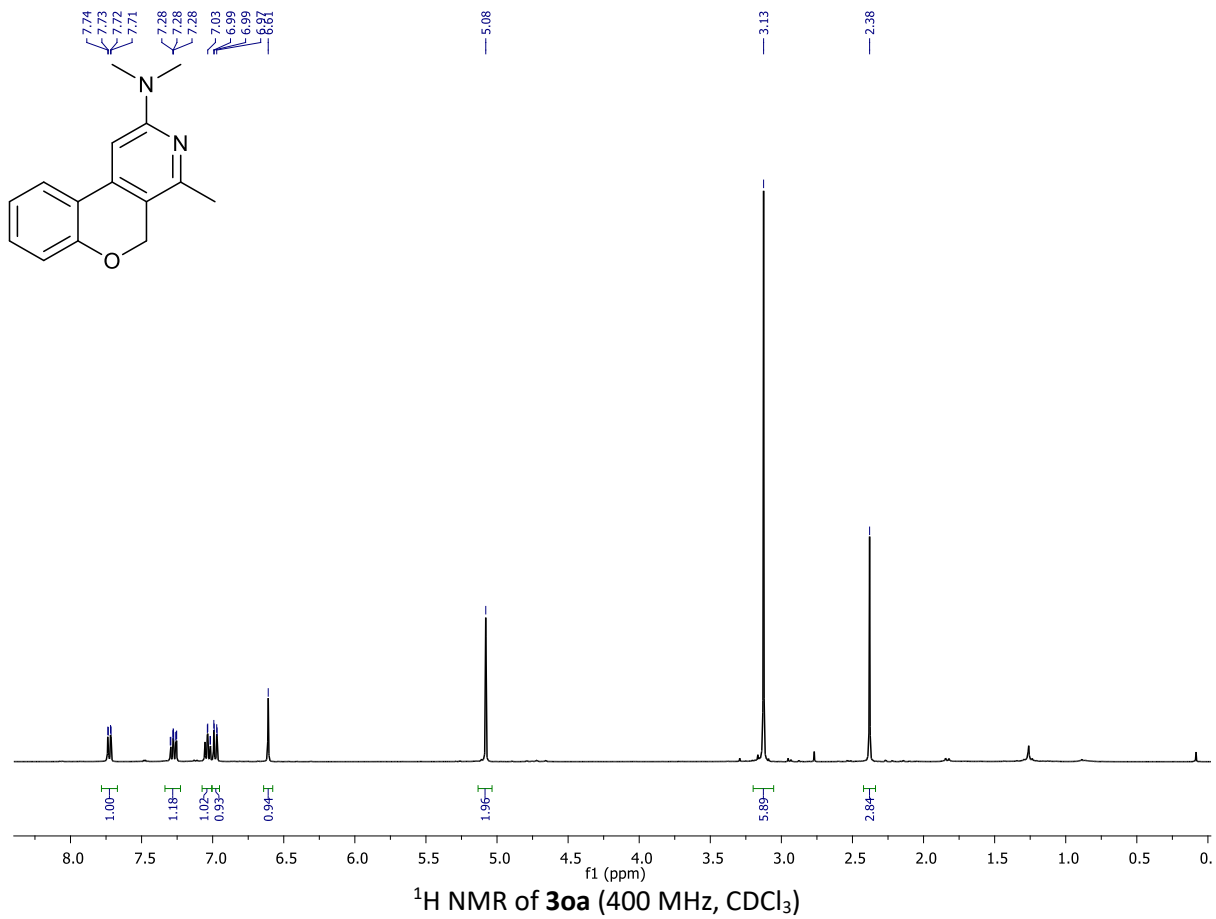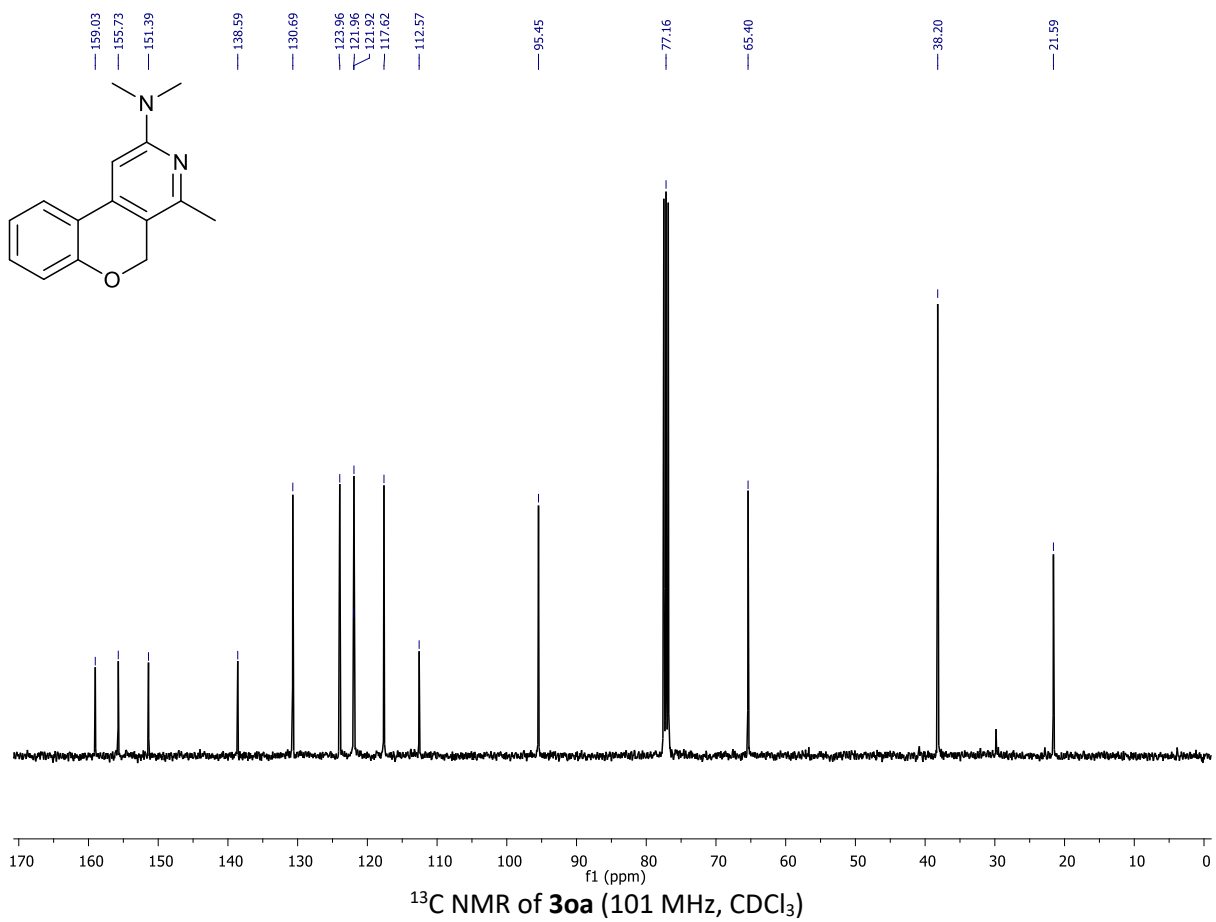

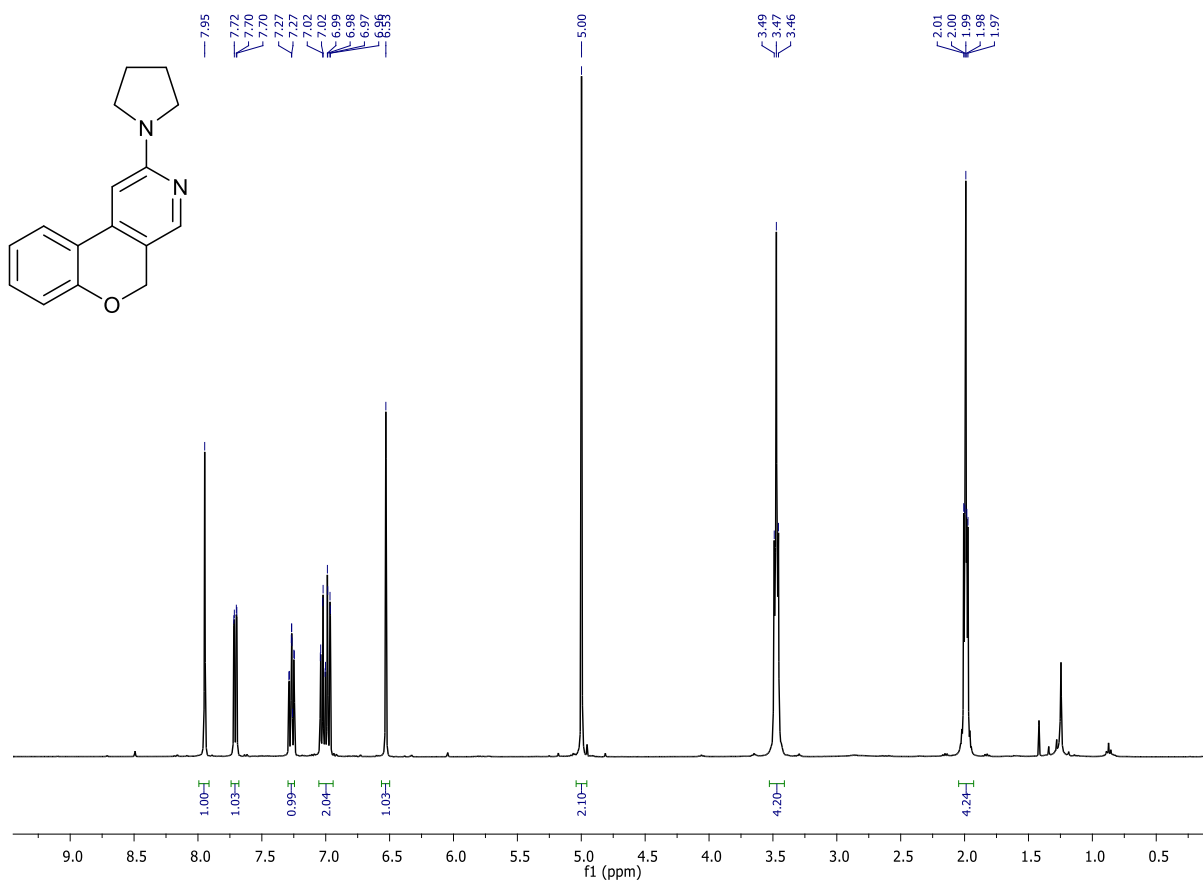

<sup>1</sup>H NMR of **3ad** (400 MHz, CDCl<sub>3</sub>)

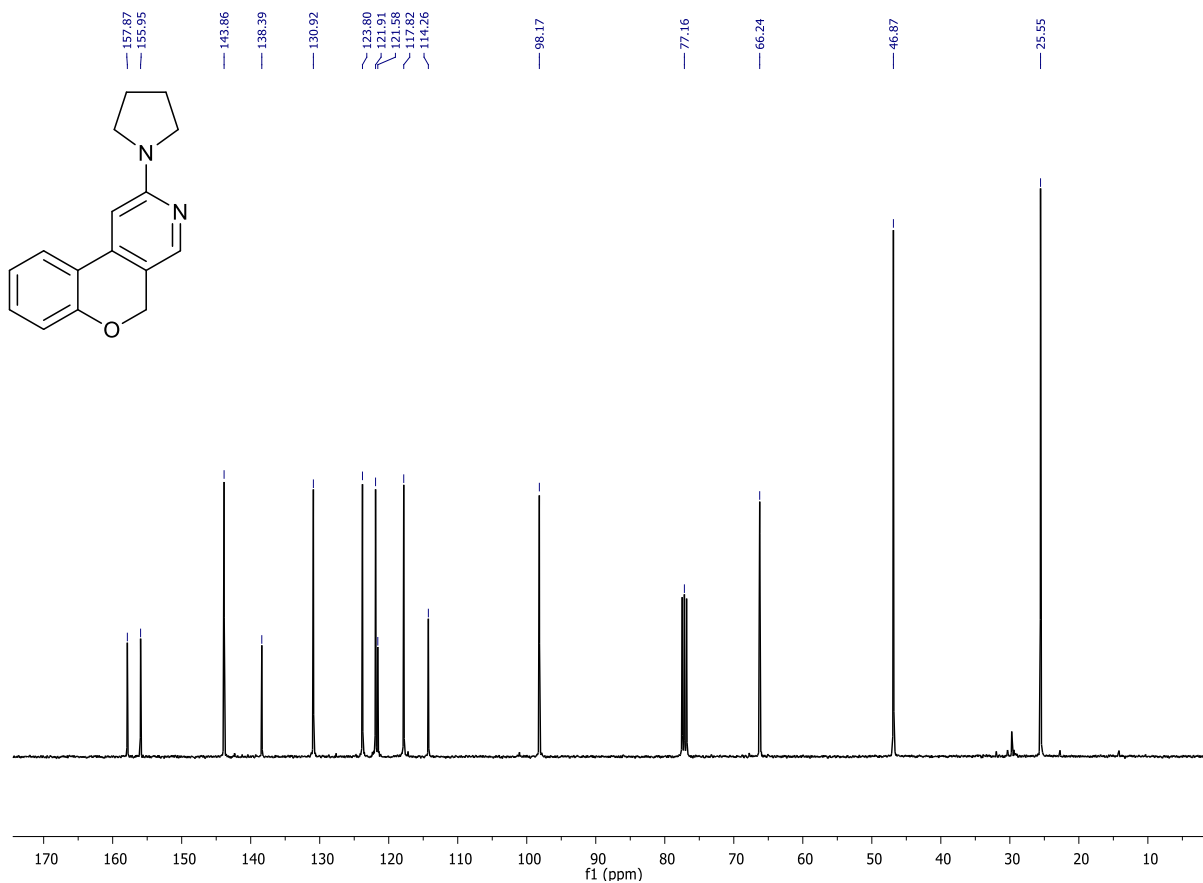

<sup>13</sup>C NMR of **3ad** (101 MHz, CDCl<sub>3</sub>)



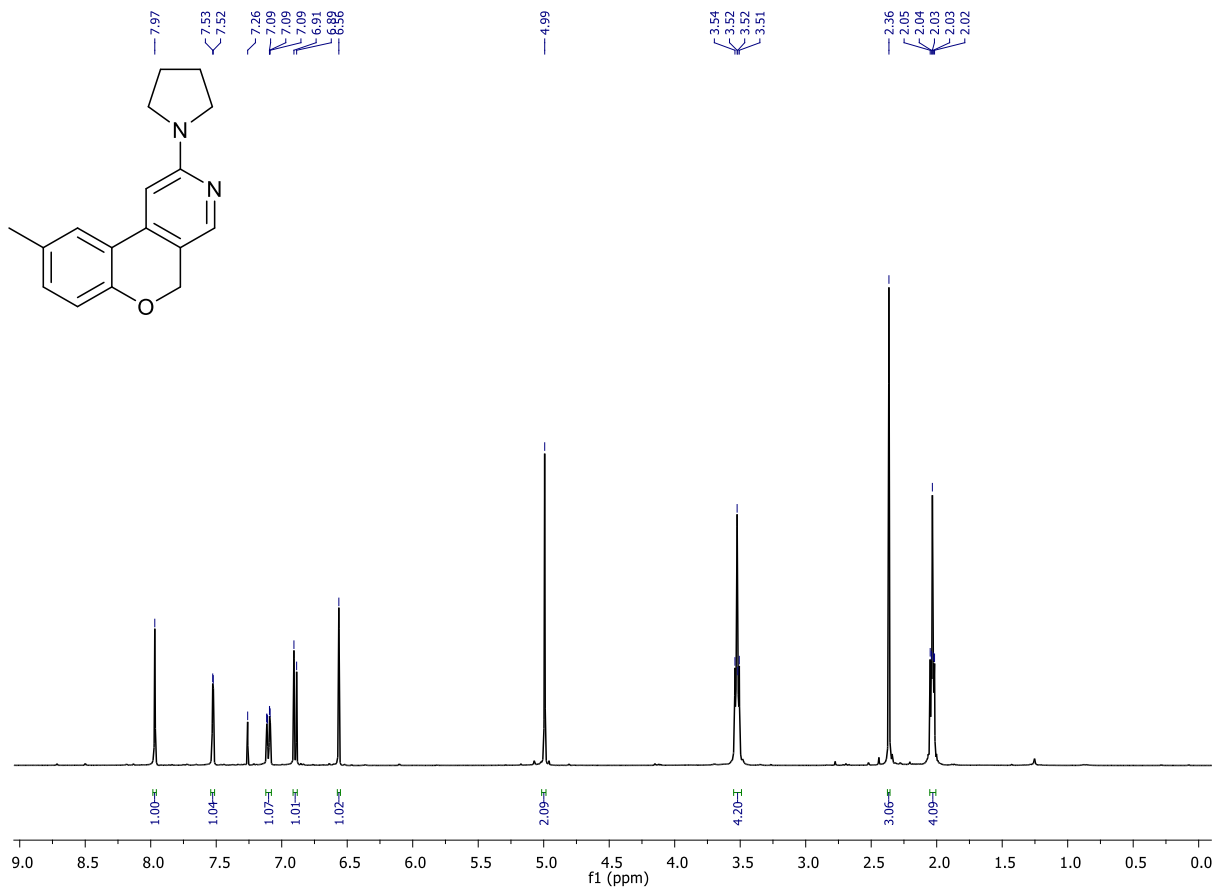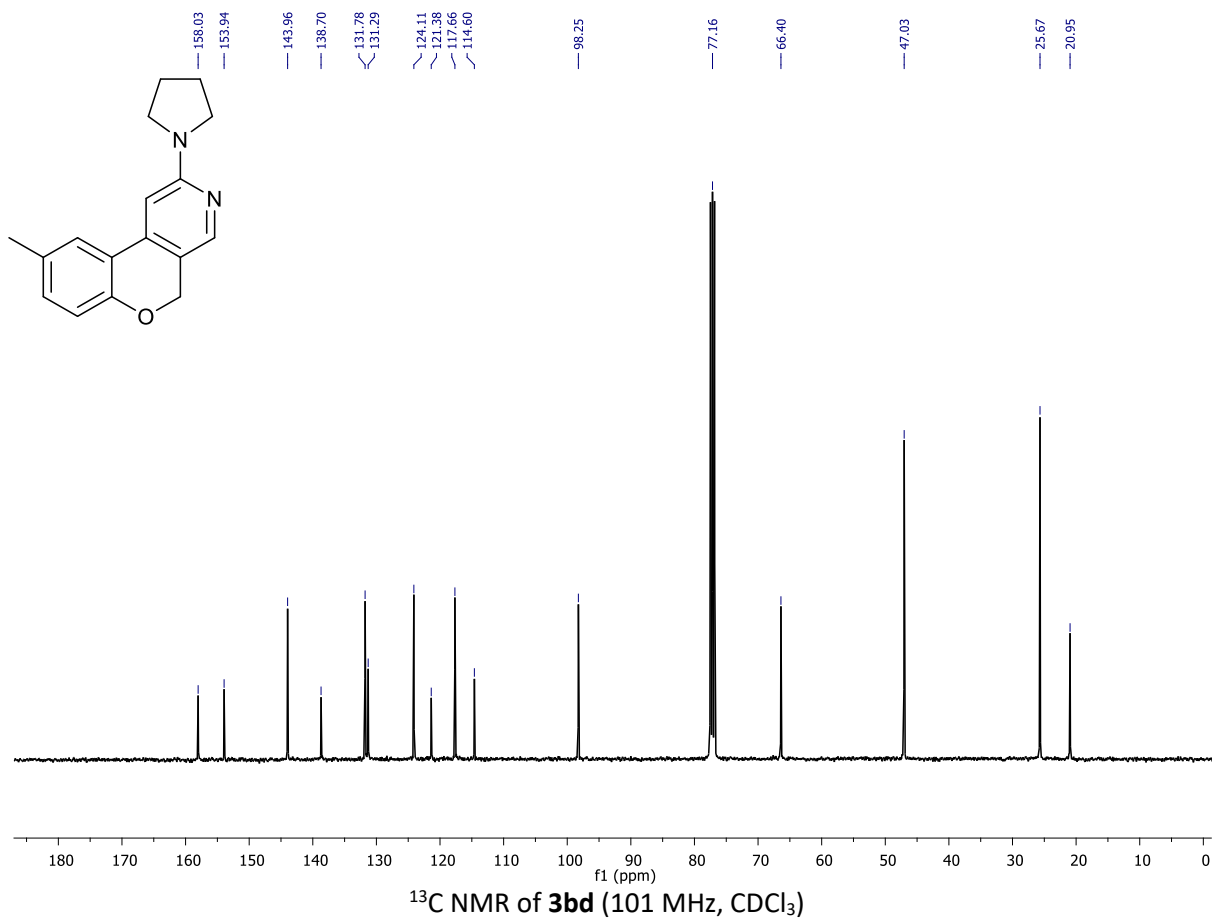

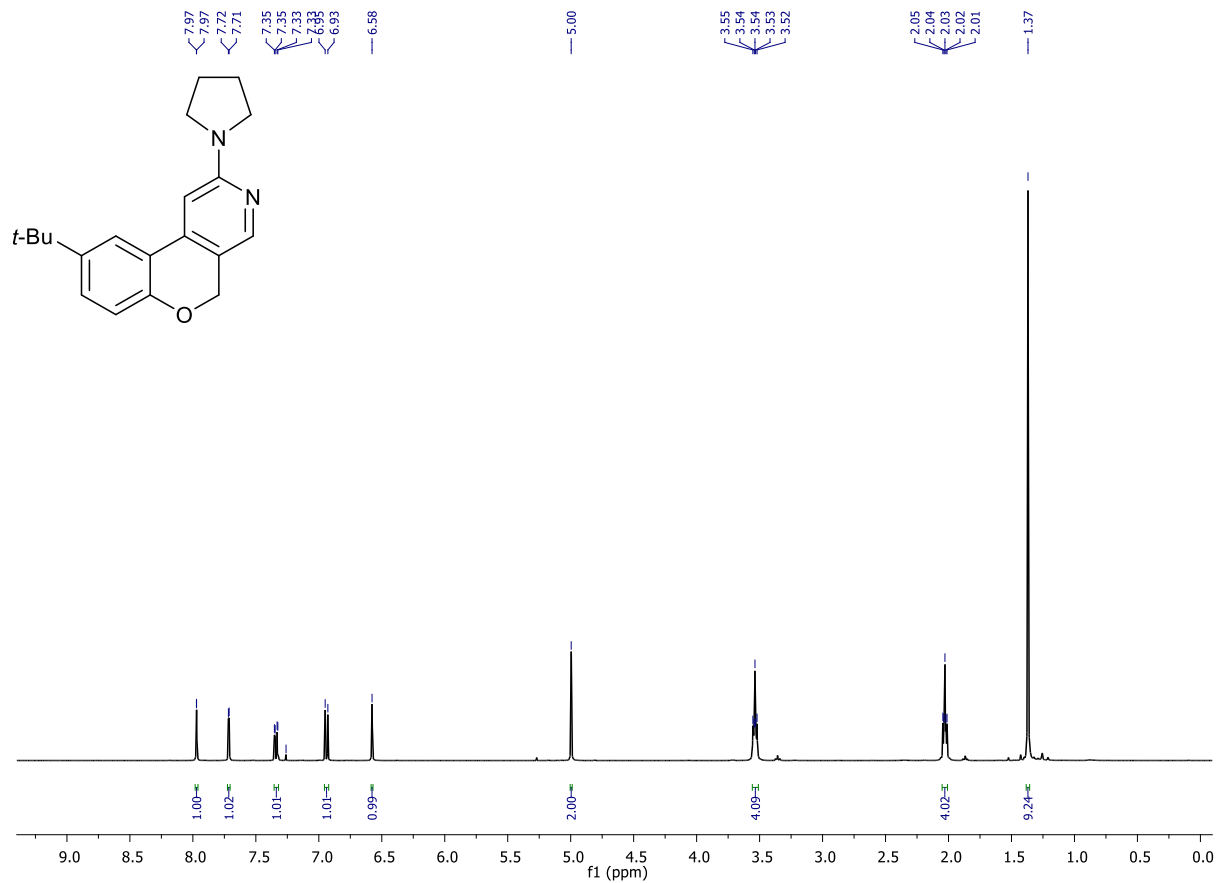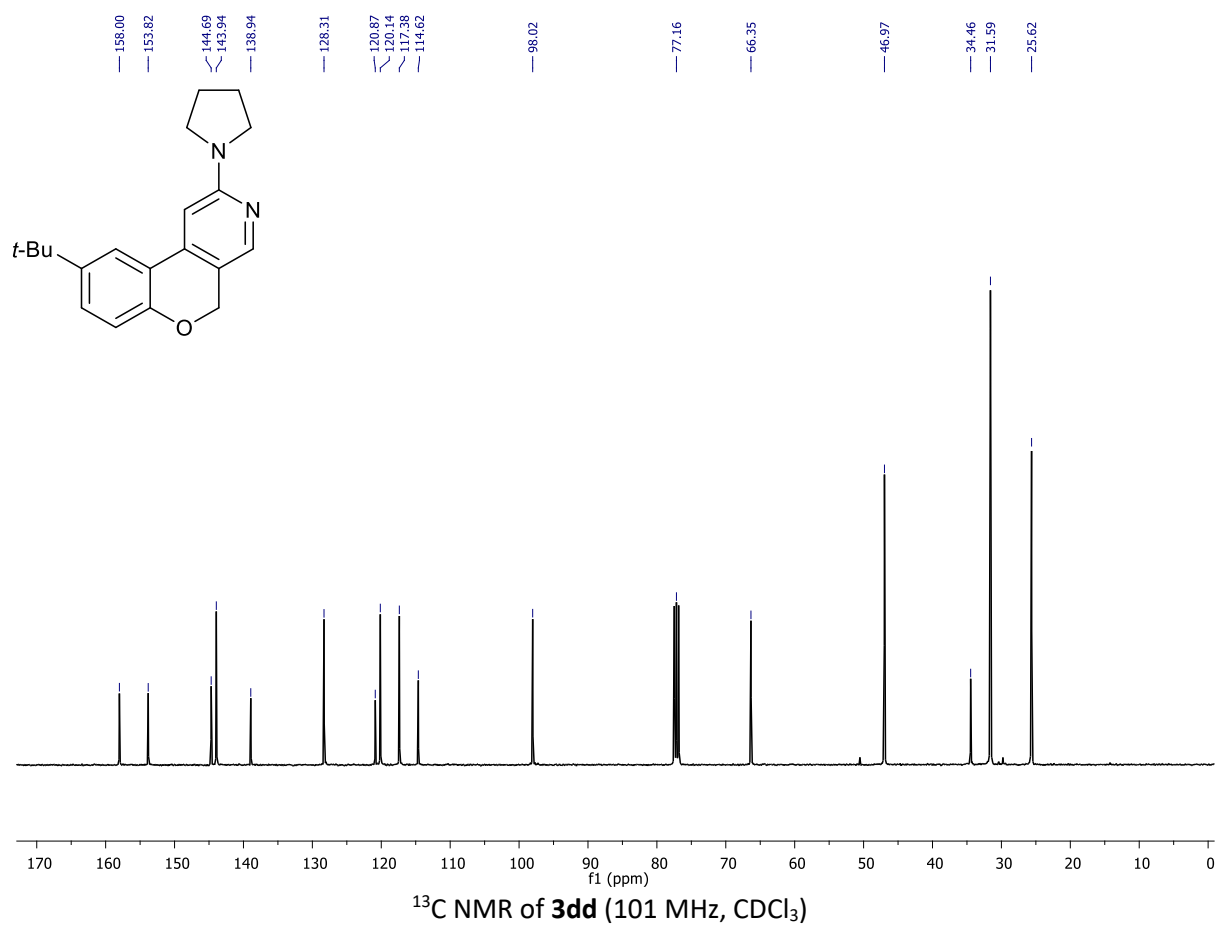

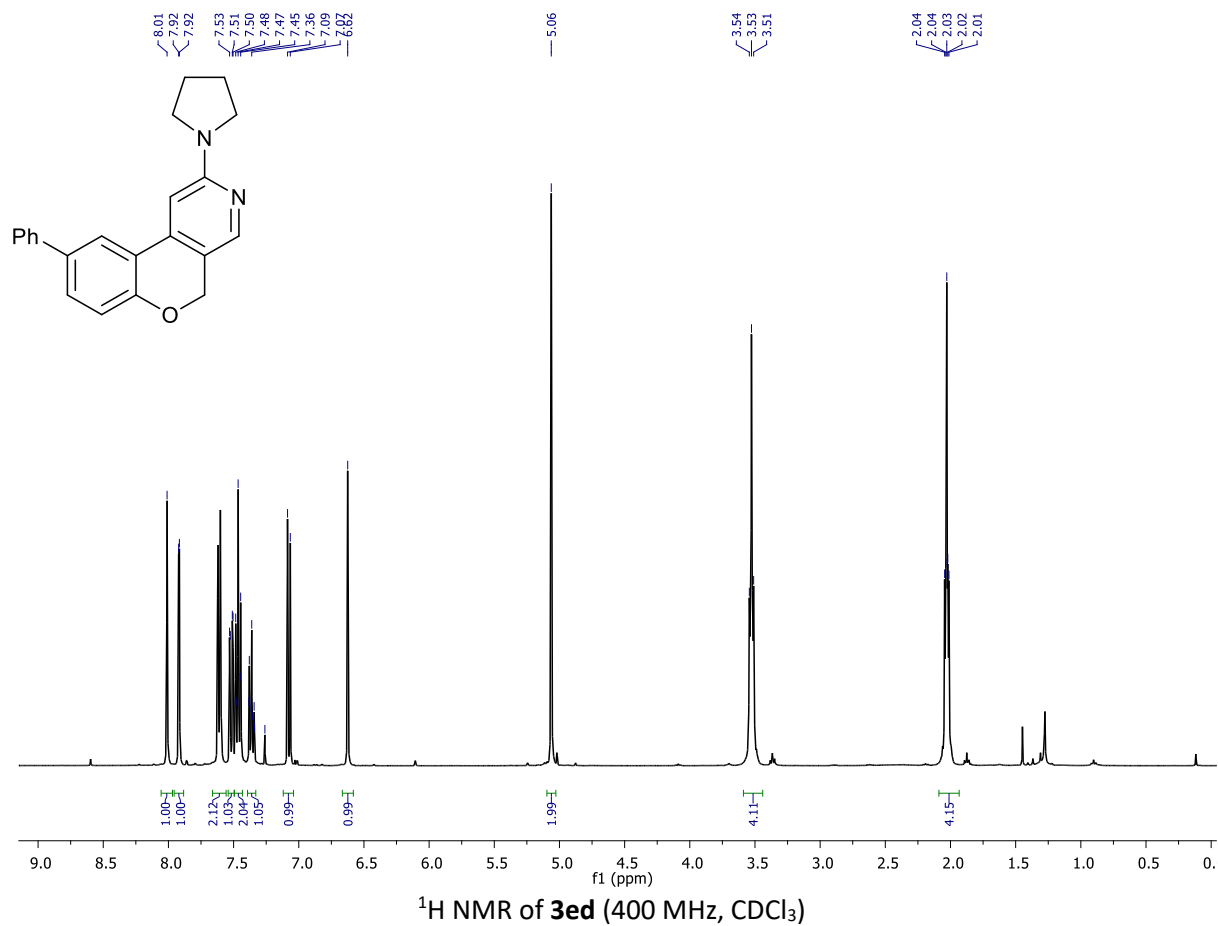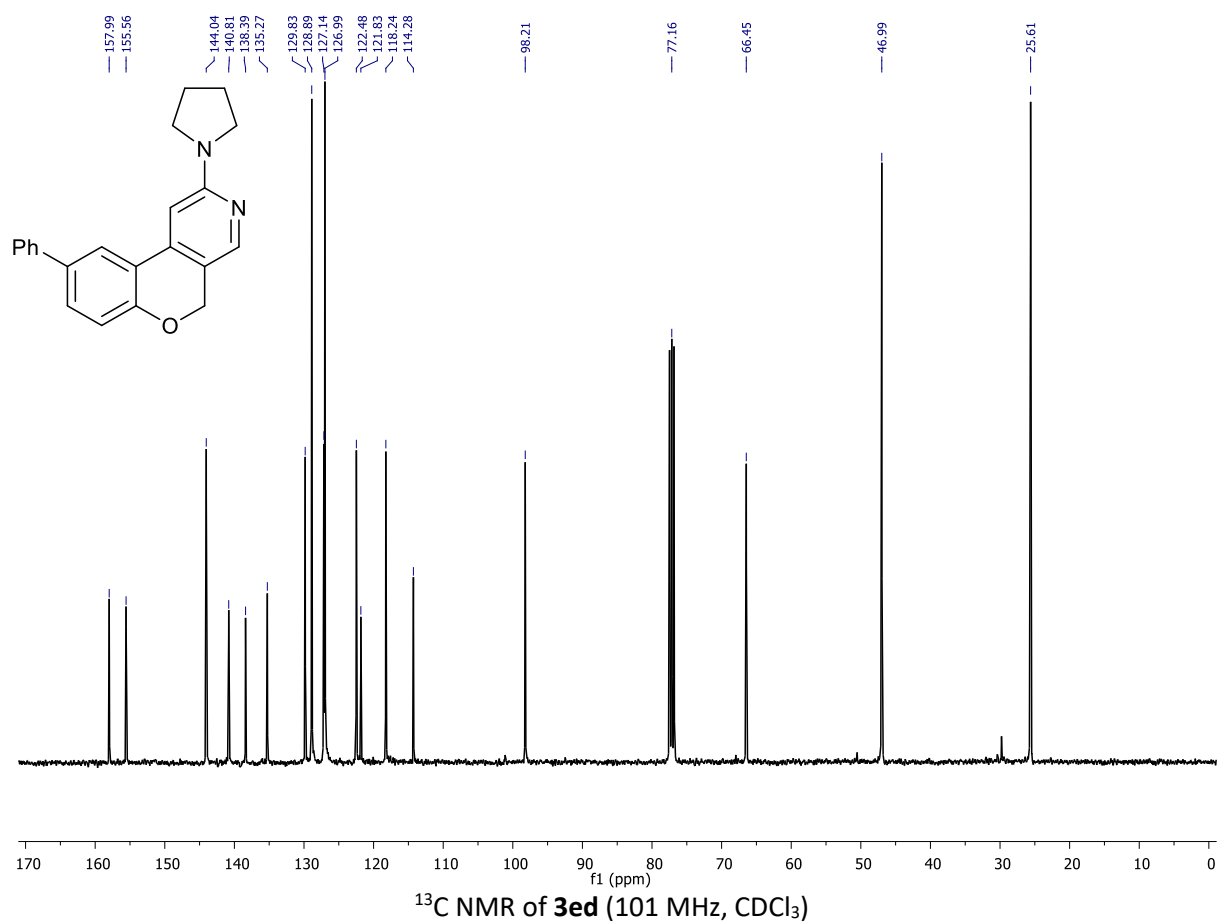

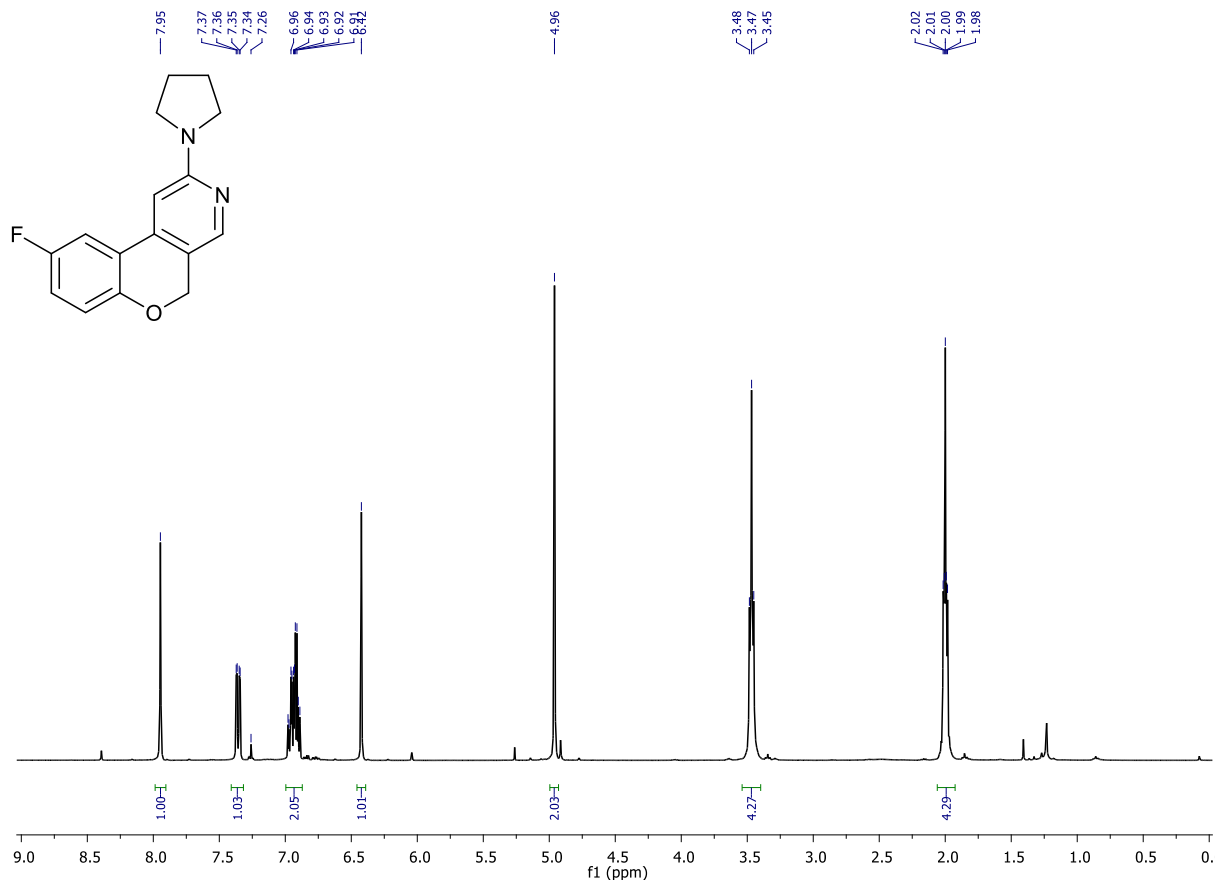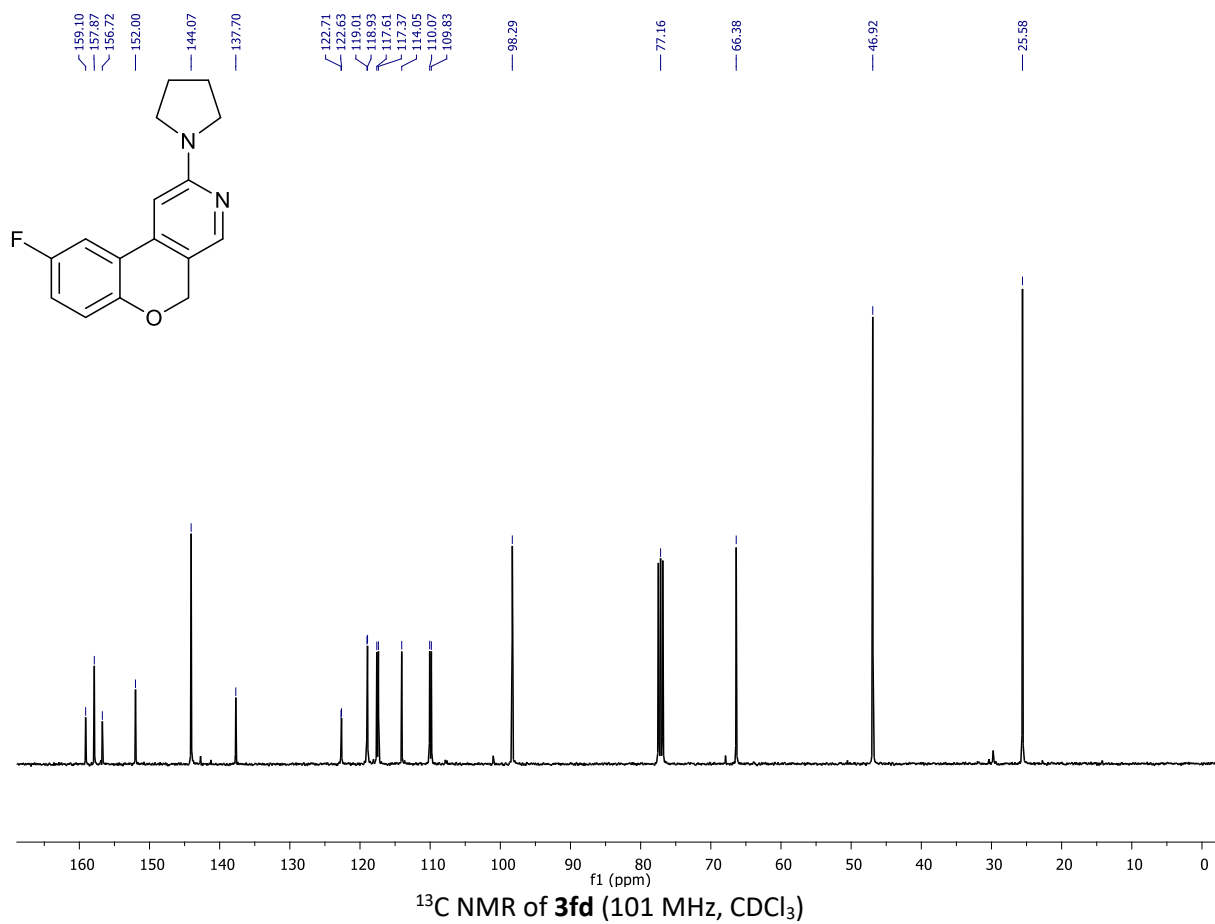

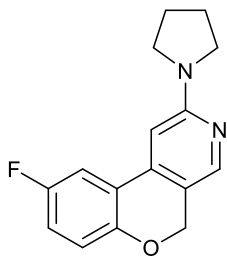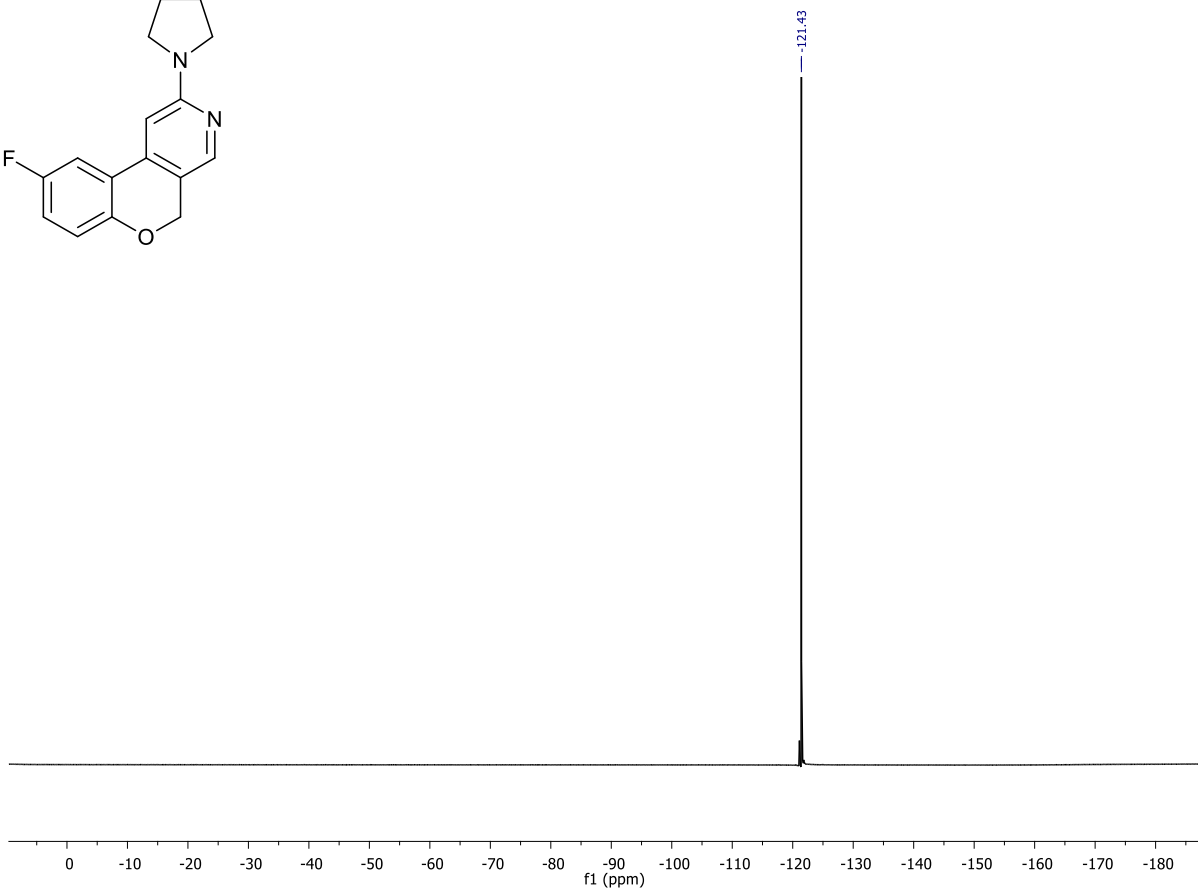

$^{19}\text{F}$  NMR of **3fd** (376.5 MHz,  $\text{CDCl}_3$ )

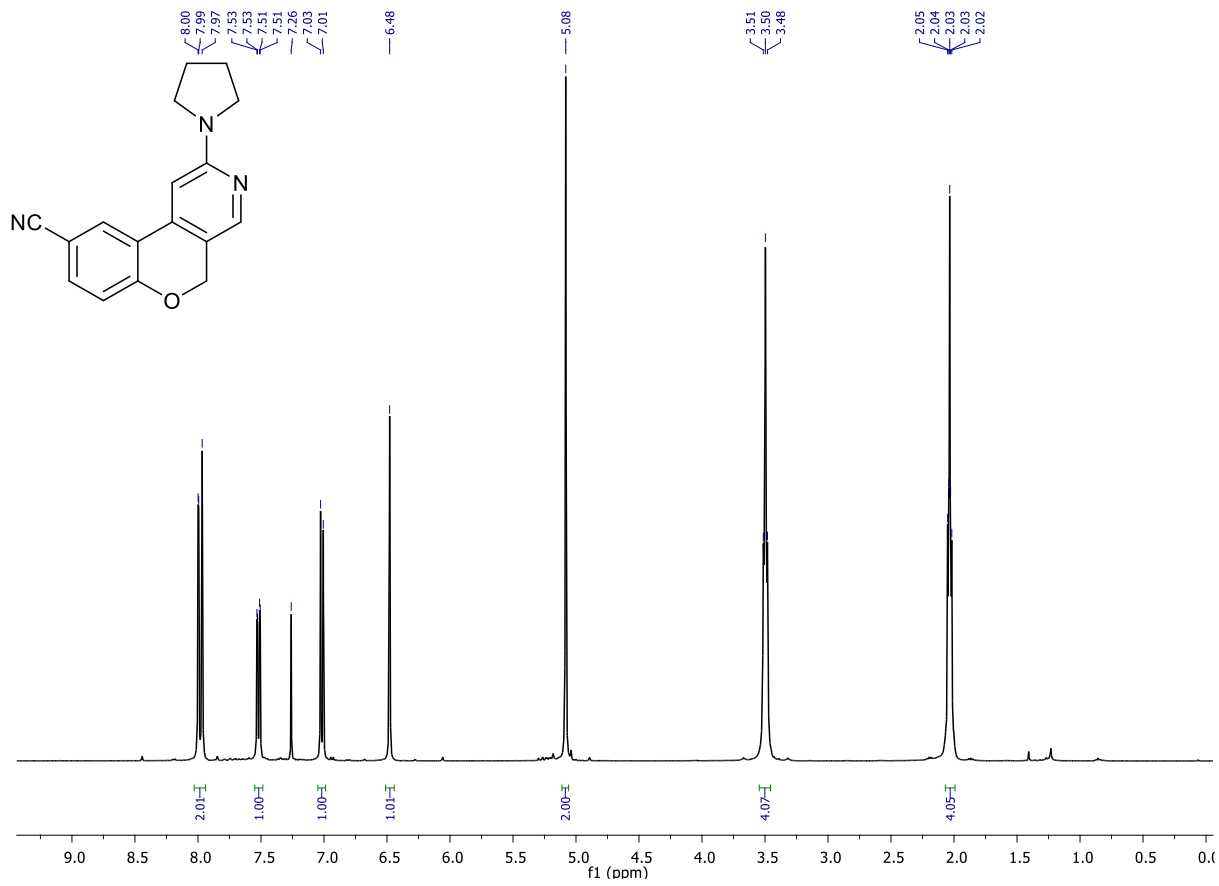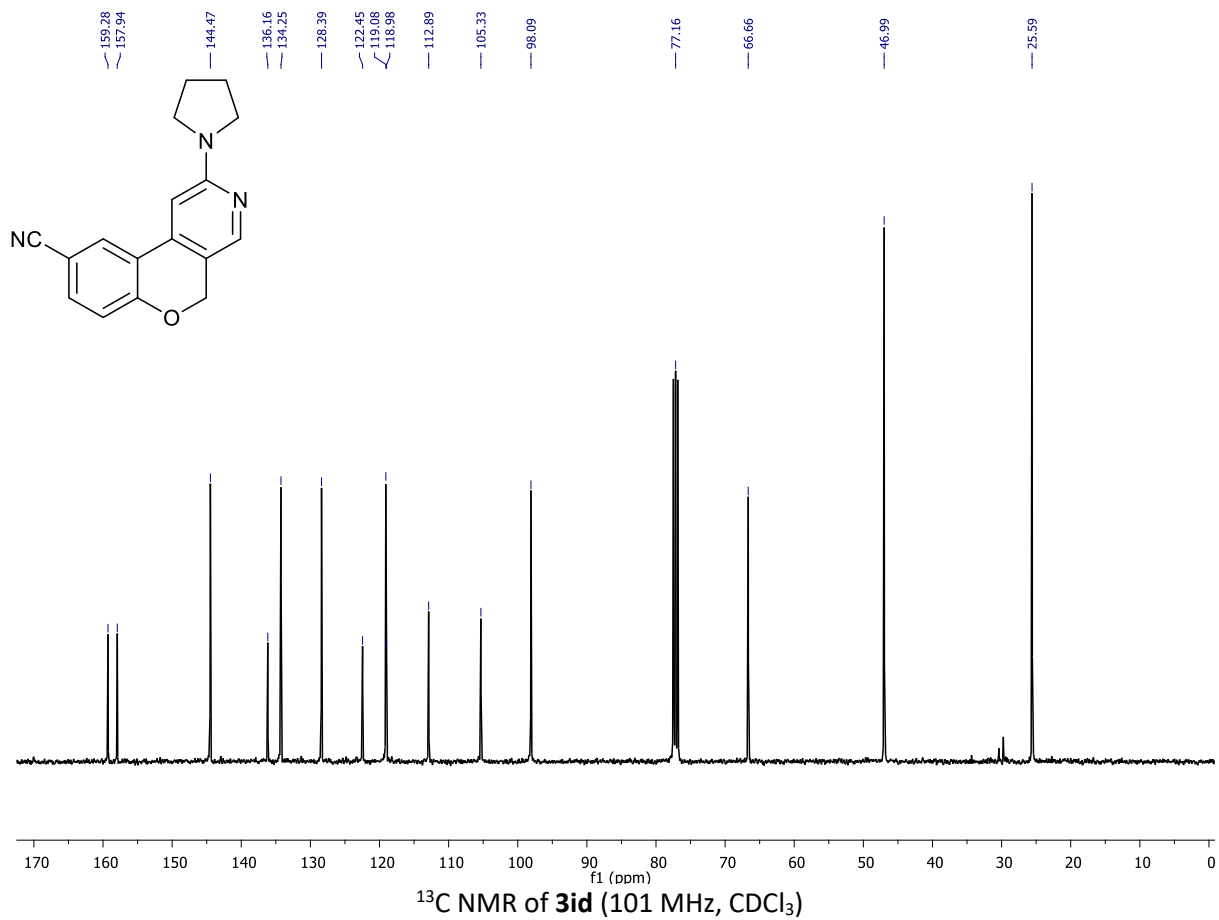

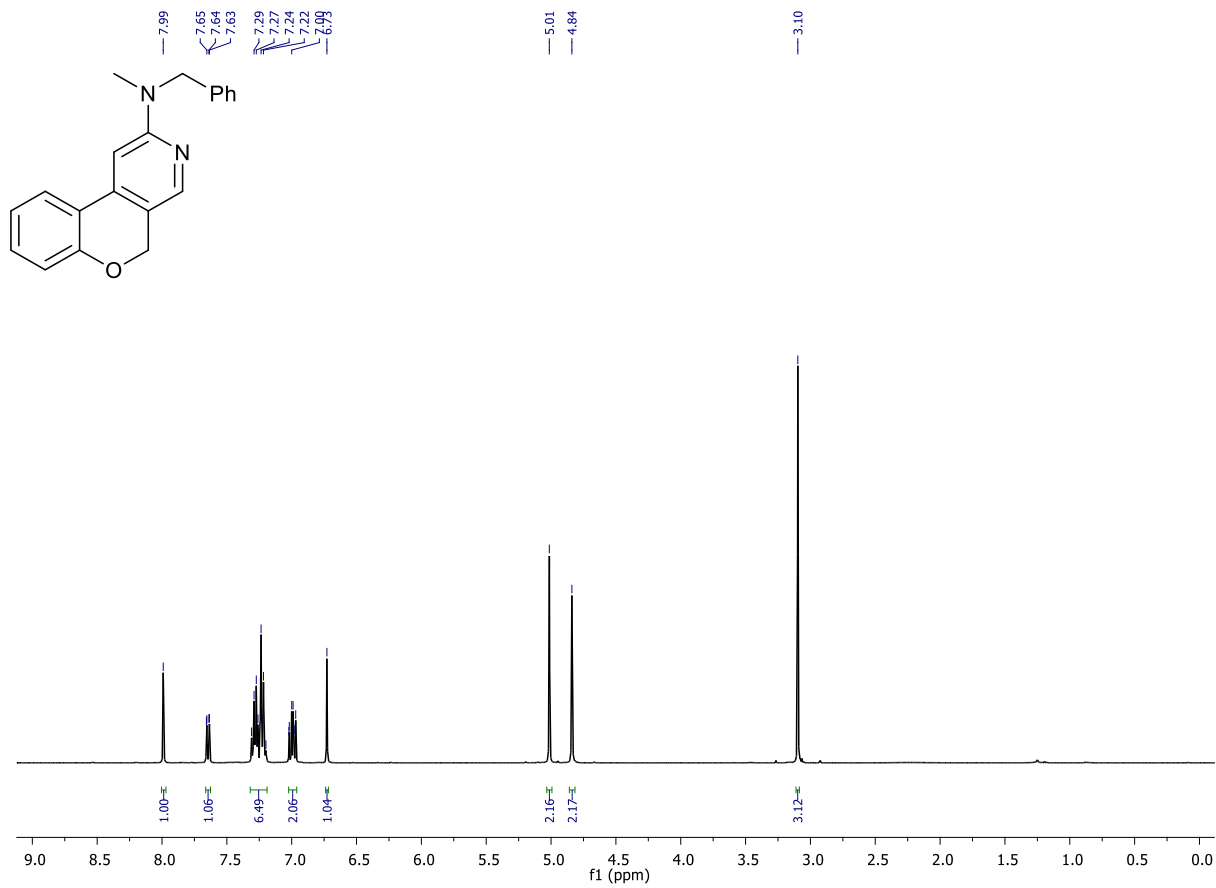

$^1\text{H}$  NMR of **3ab** (400 MHz,  $\text{CDCl}_3$ )

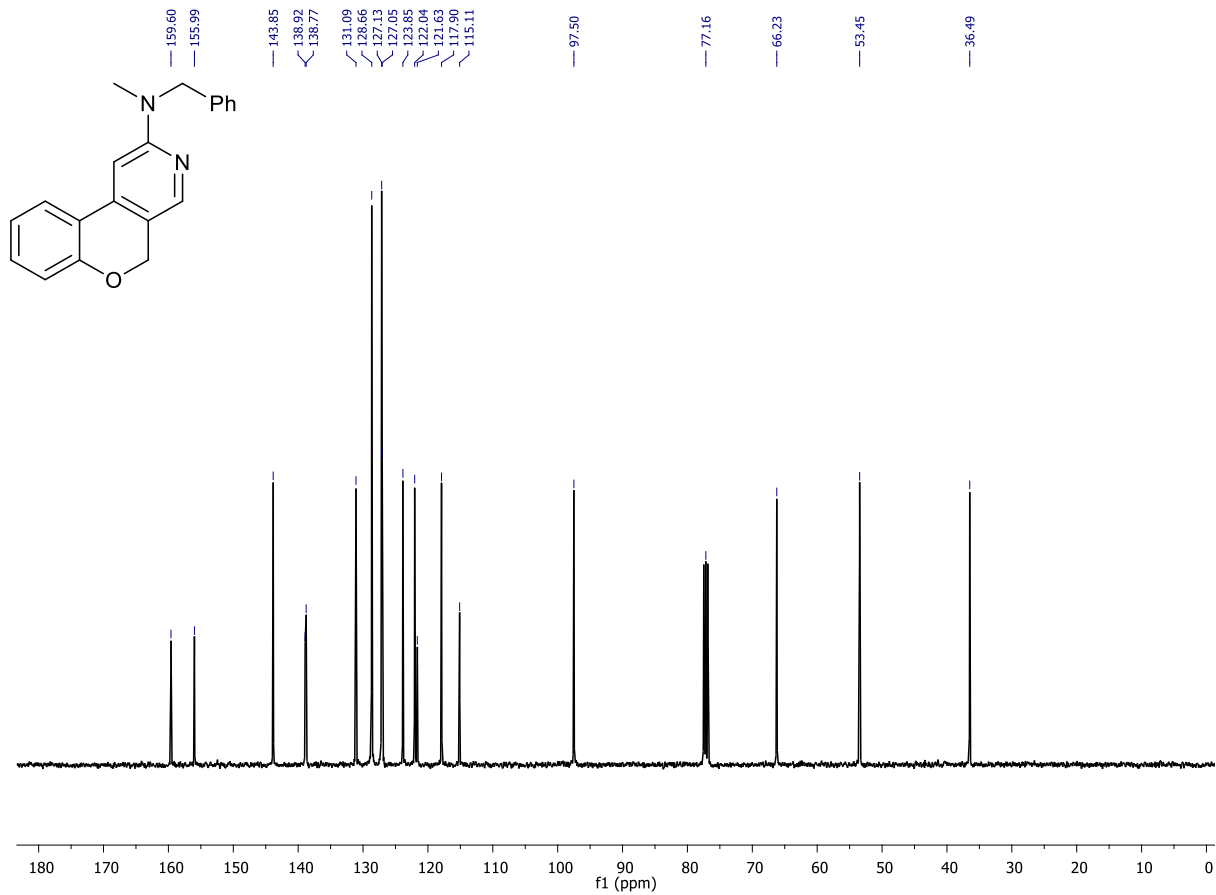

$^{13}\text{C}$  NMR of **3ab** (101 MHz,  $\text{CDCl}_3$ )

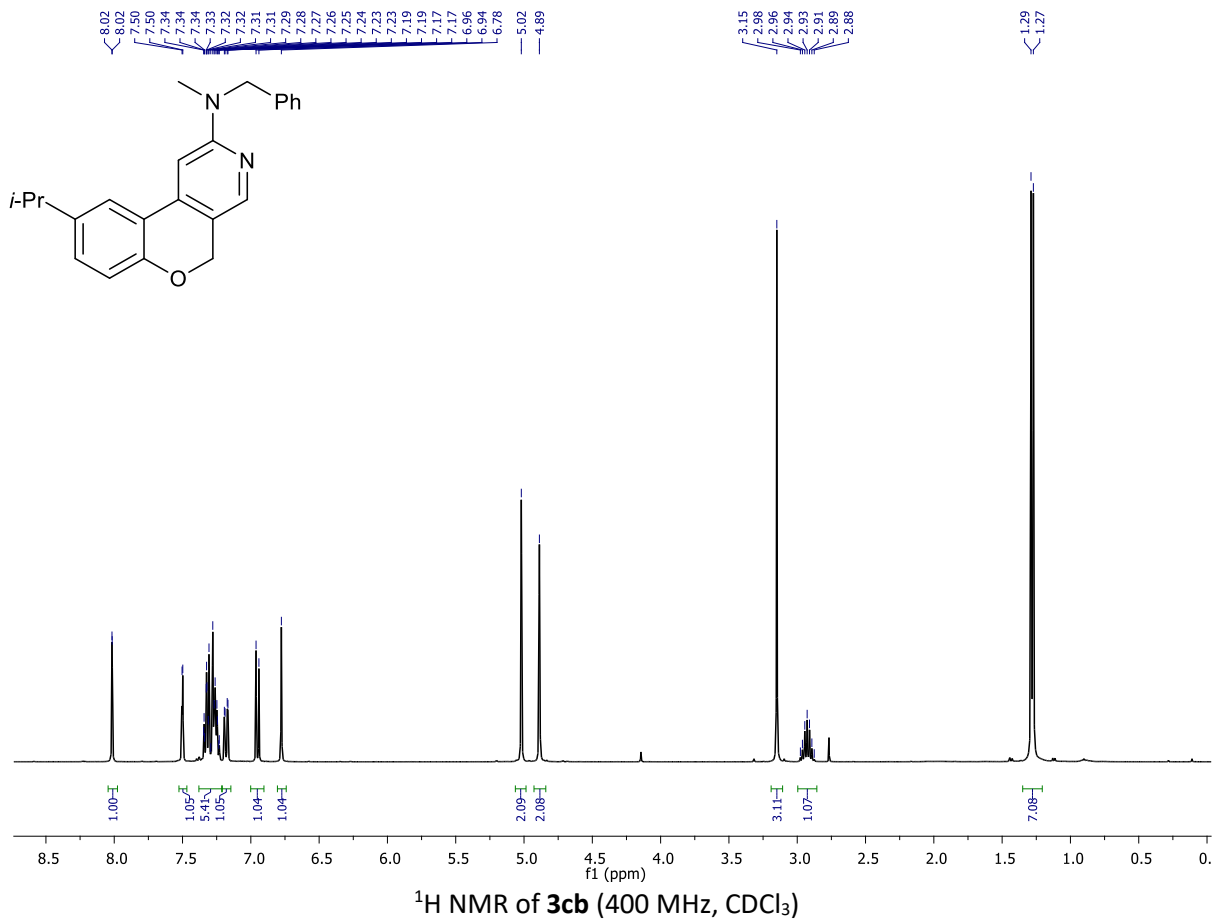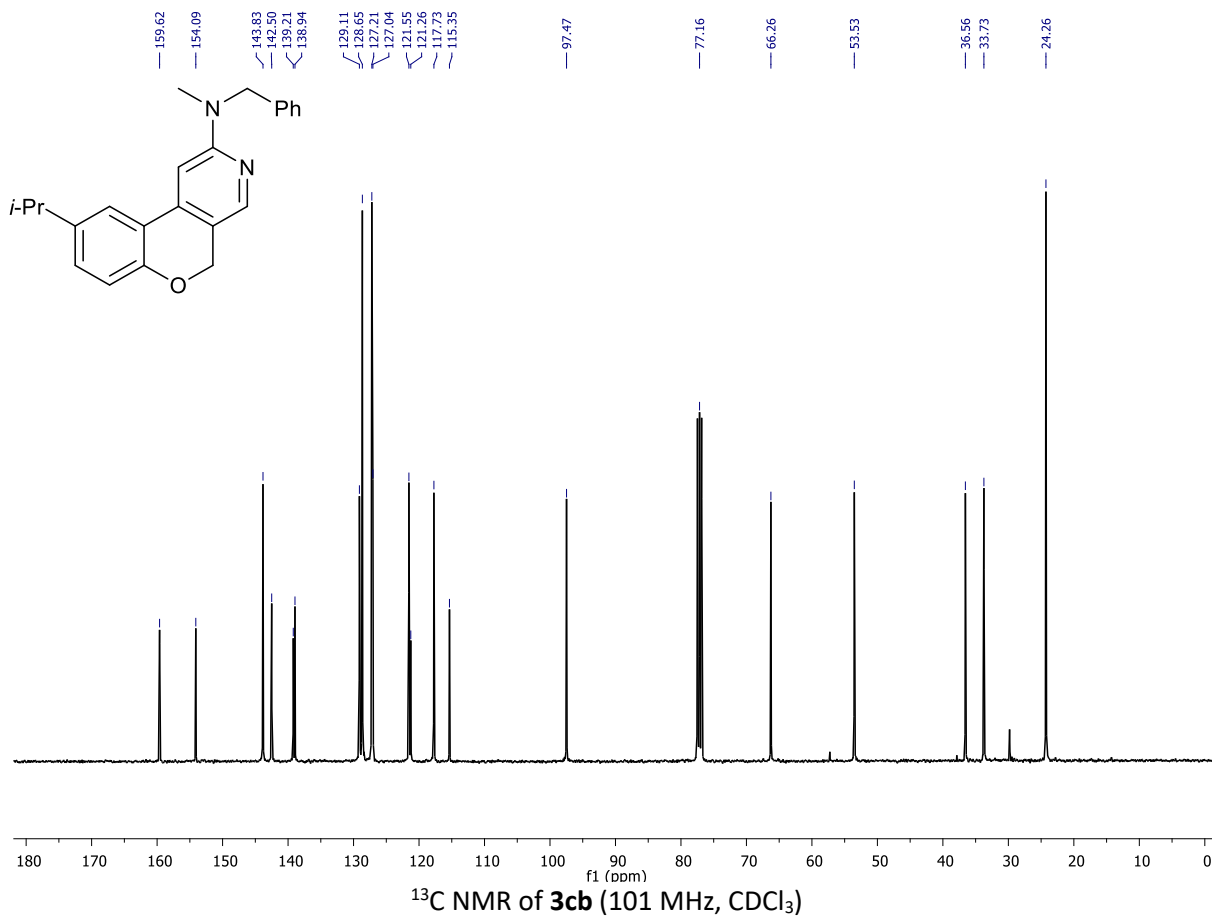



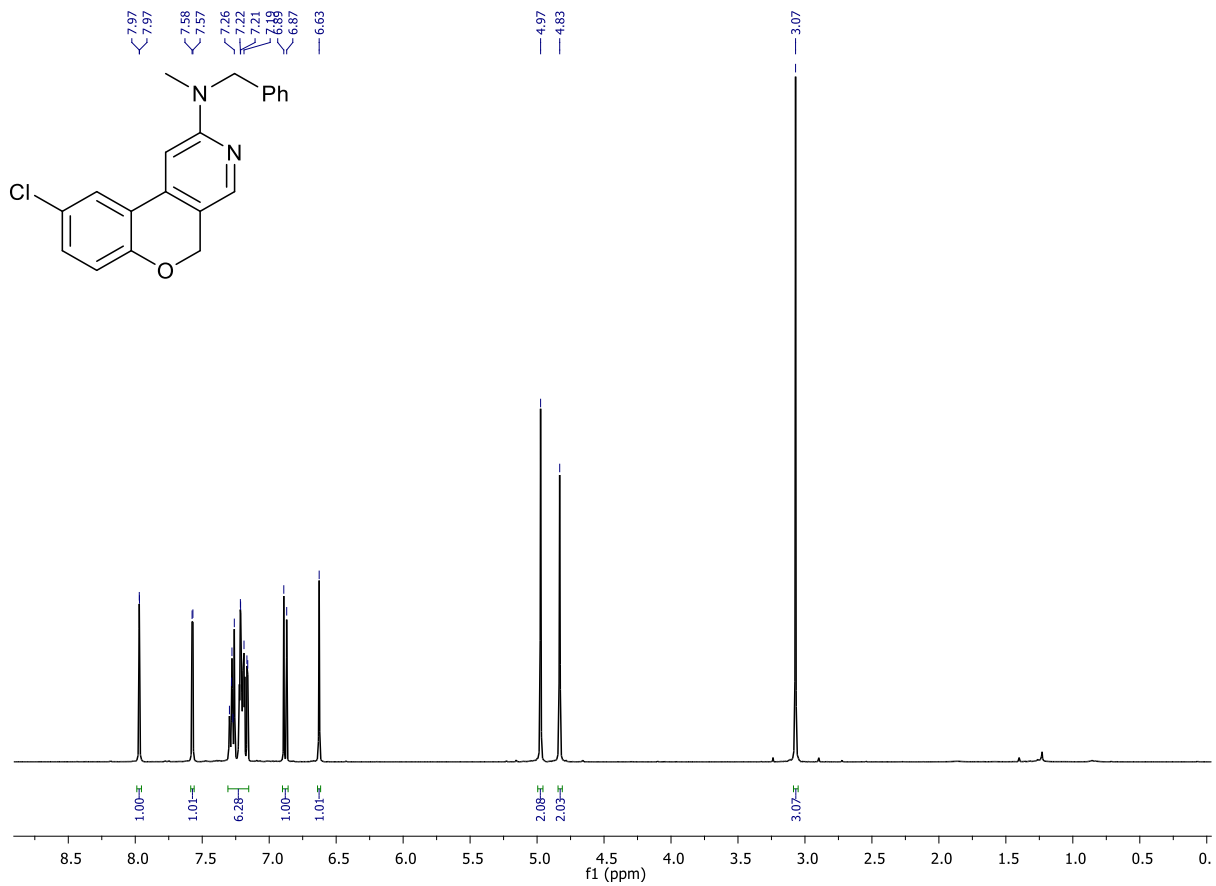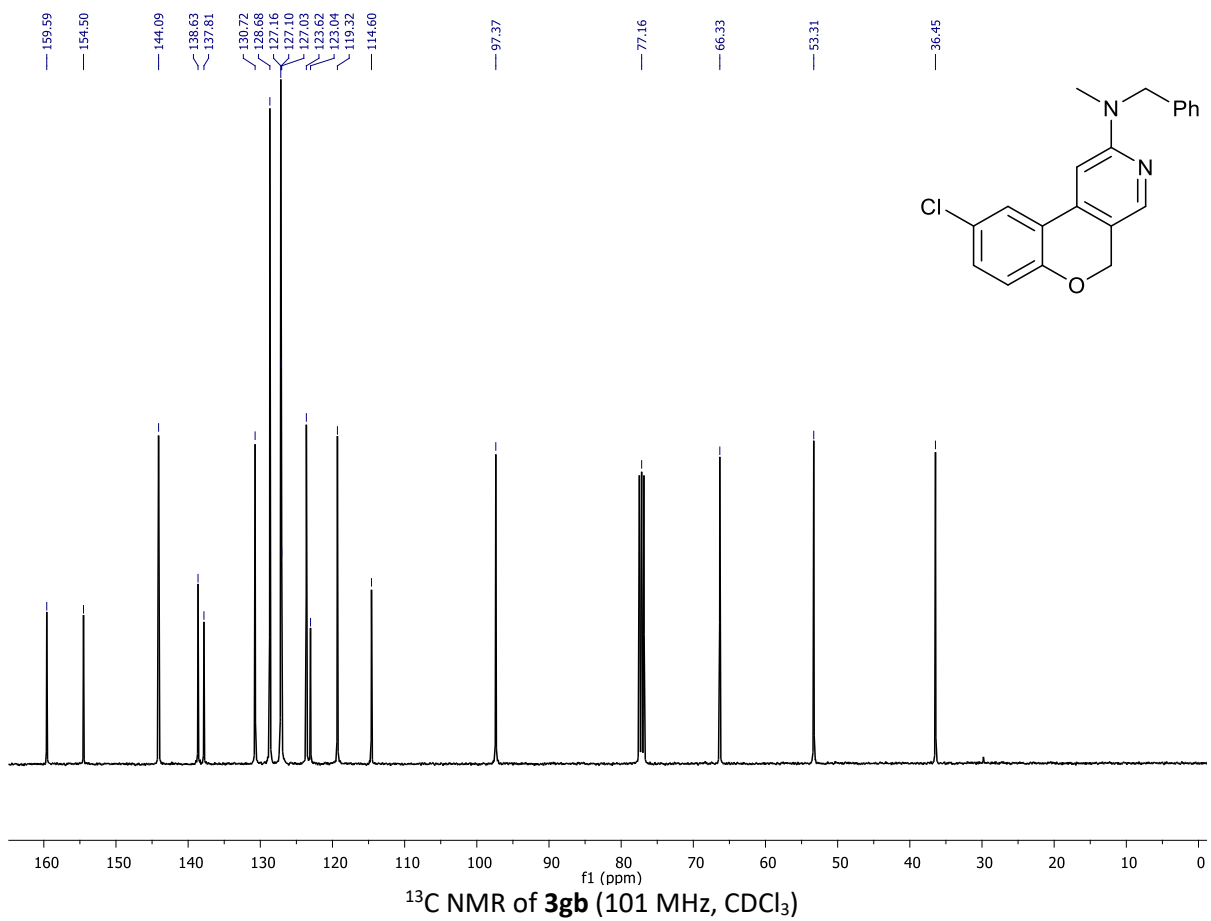

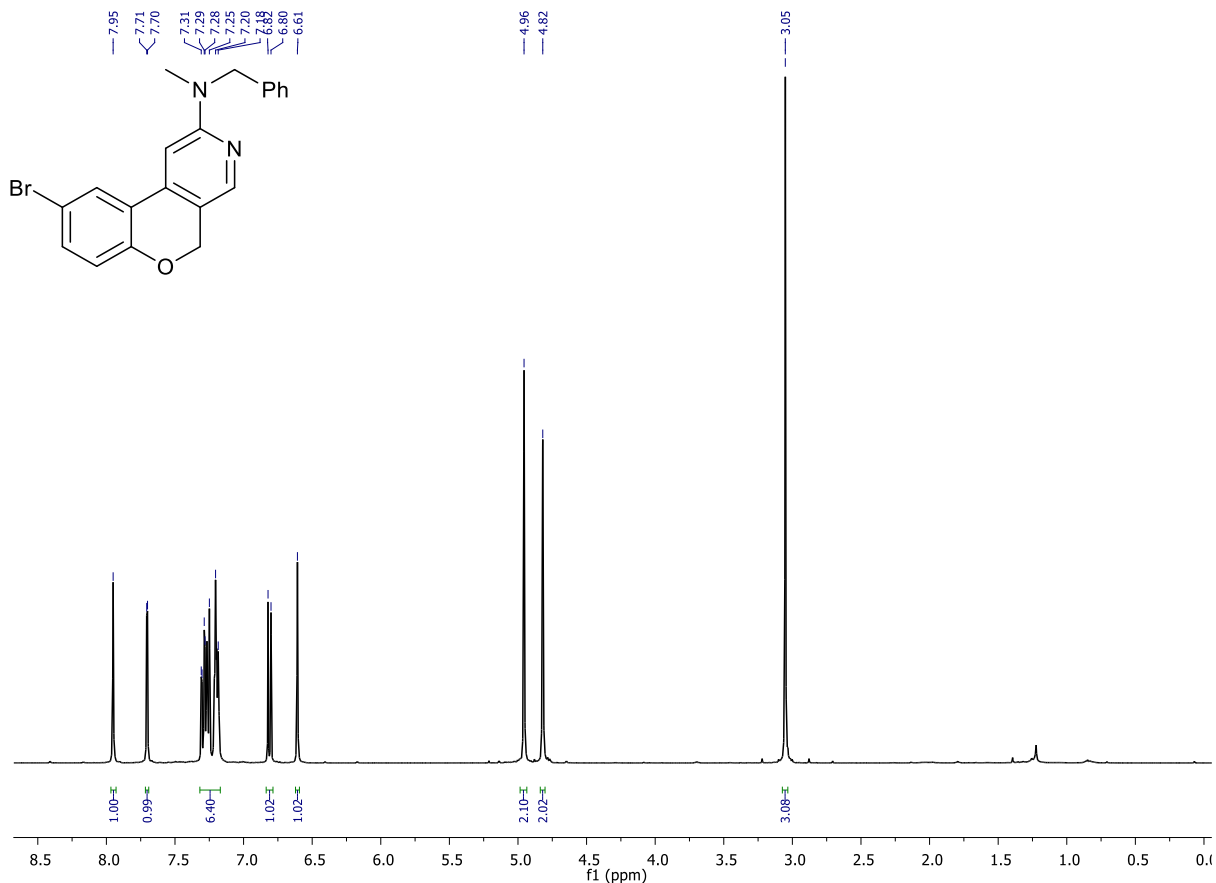

$^1\text{H NMR}$  of **3hb** (400 MHz,  $\text{CDCl}_3$ )

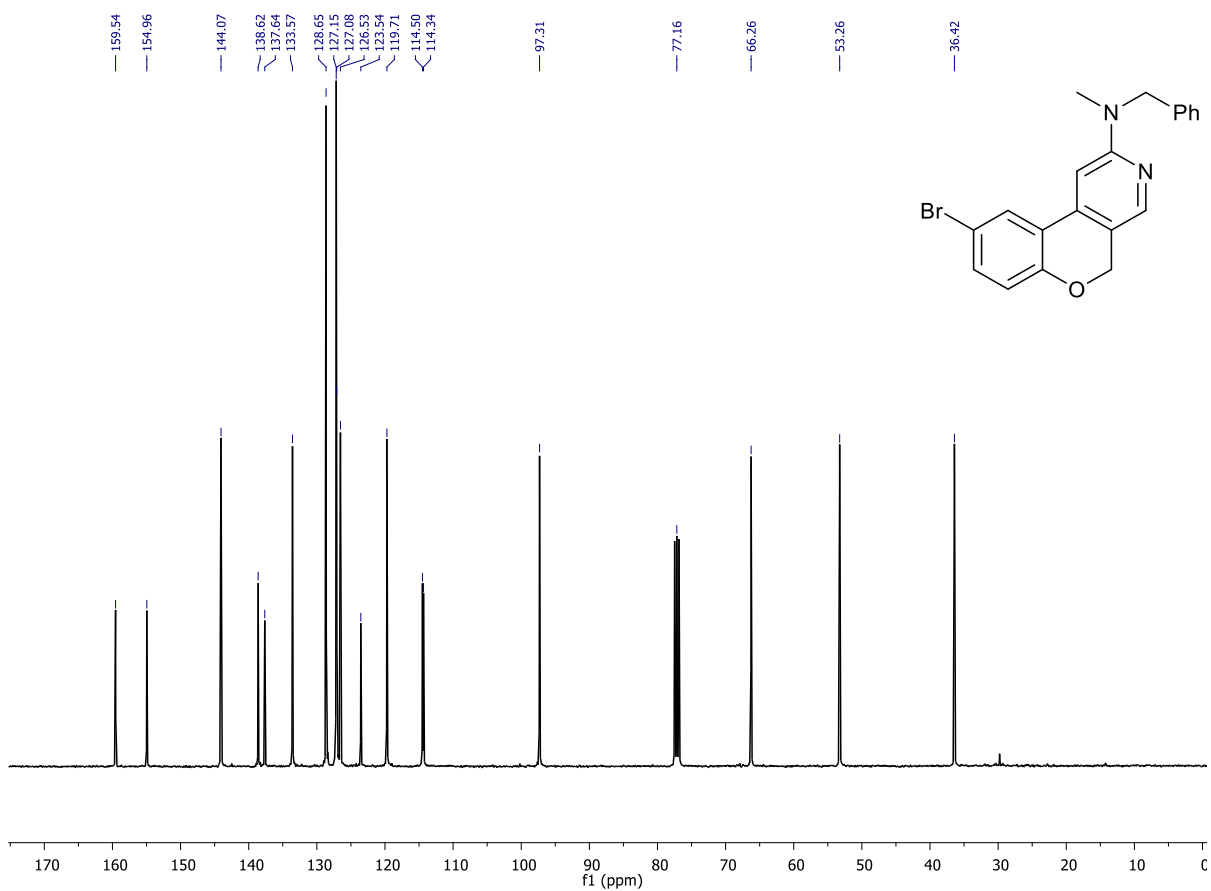

$^{13}\text{C NMR}$  of **3hb** (101 MHz,  $\text{CDCl}_3$ )

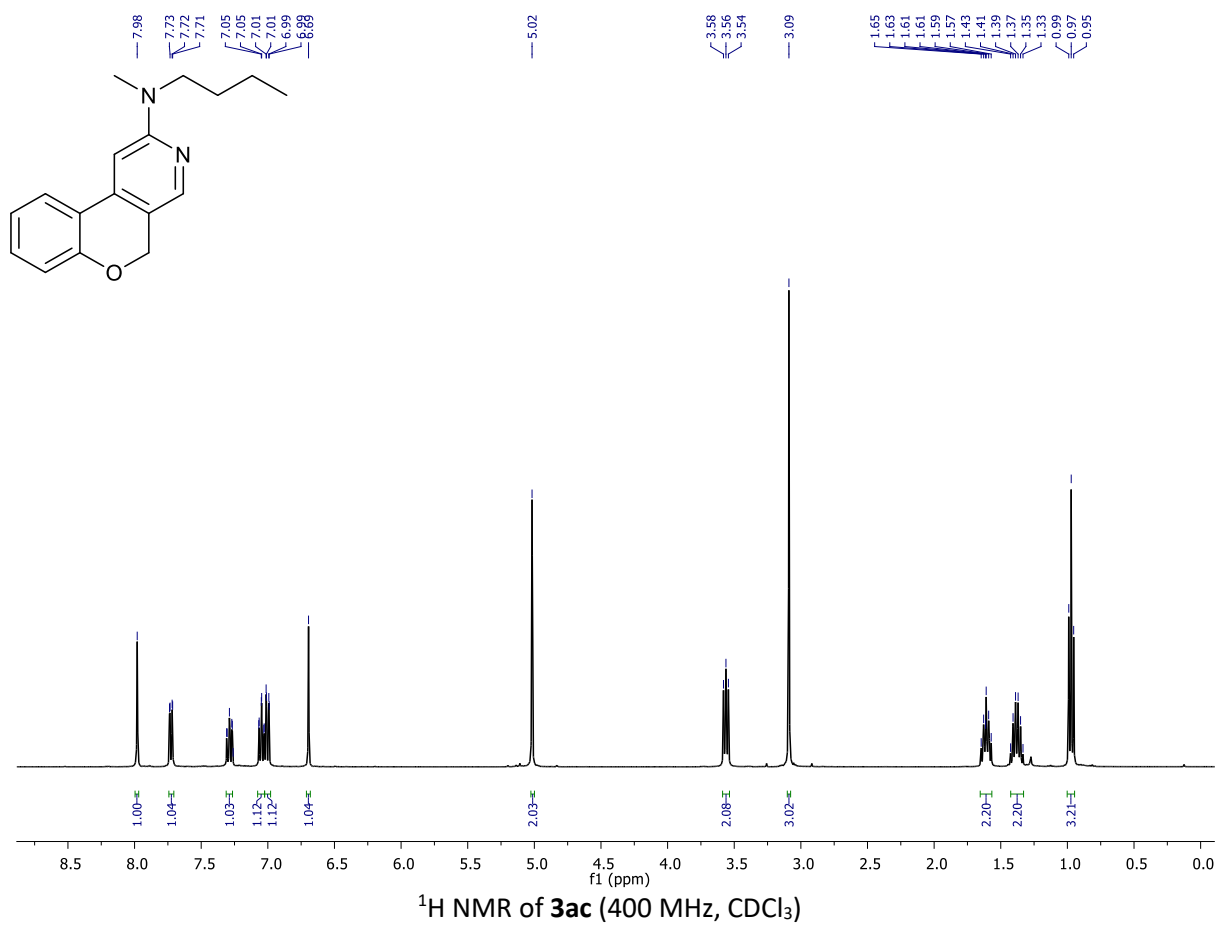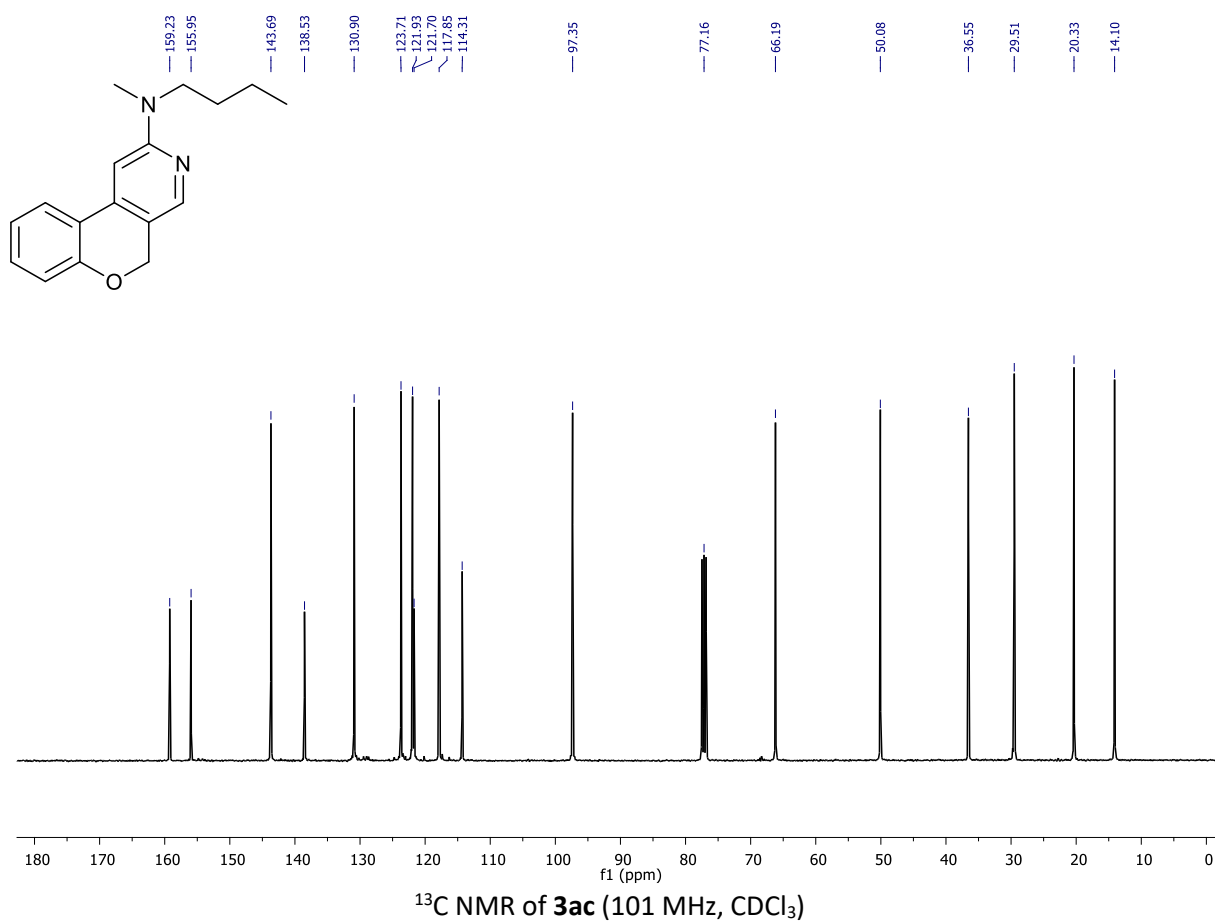

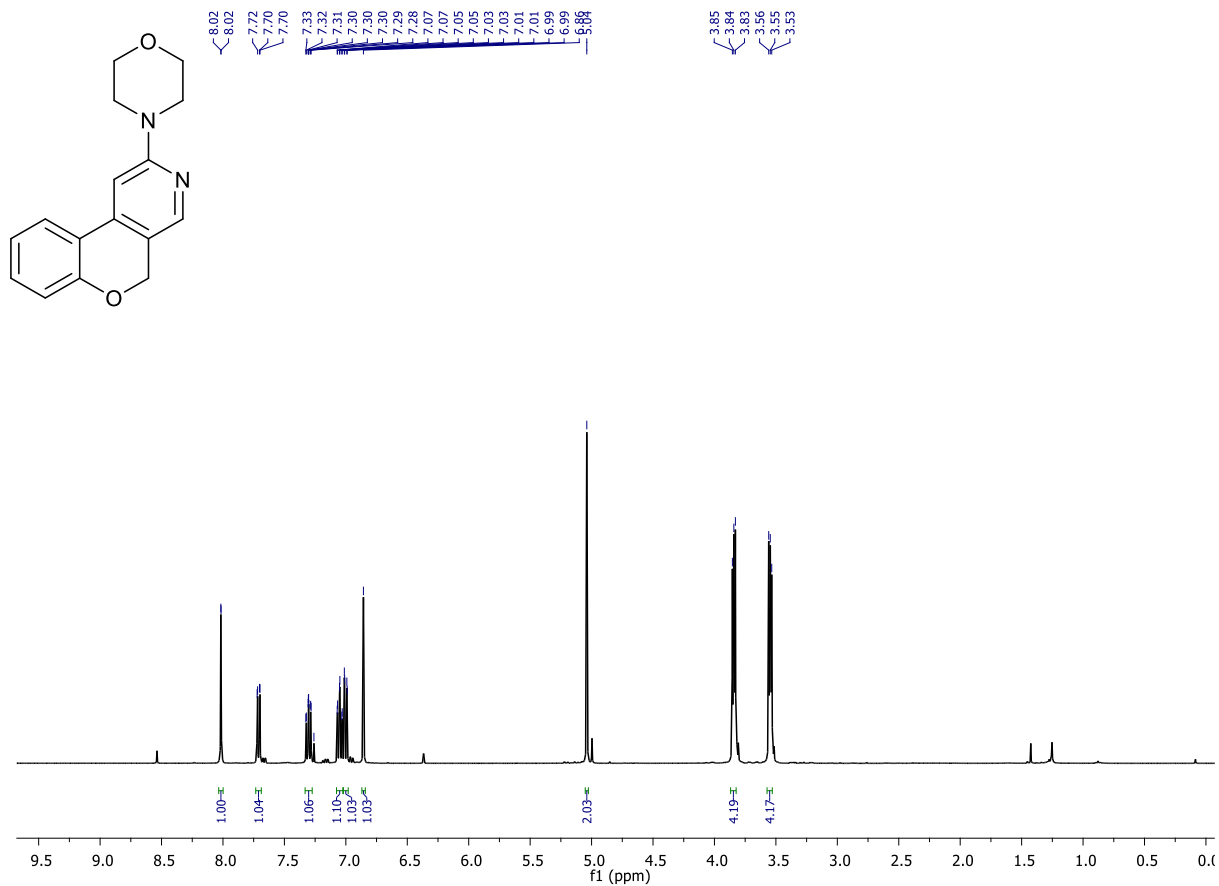

$^1\text{H}$  NMR of **3ae** (400 MHz,  $\text{CDCl}_3$ )

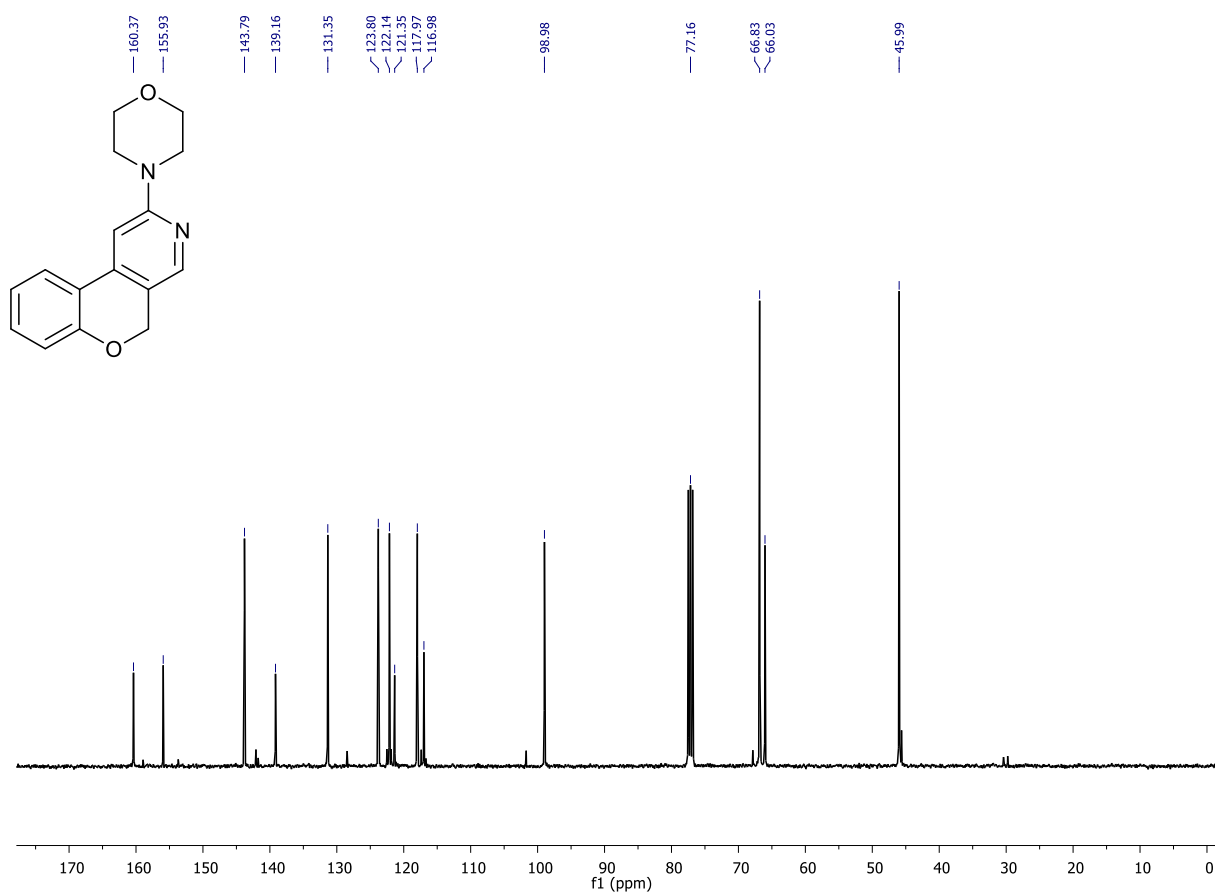

$^{13}\text{C}$  NMR of **3ae** (101 MHz,  $\text{CDCl}_3$ )

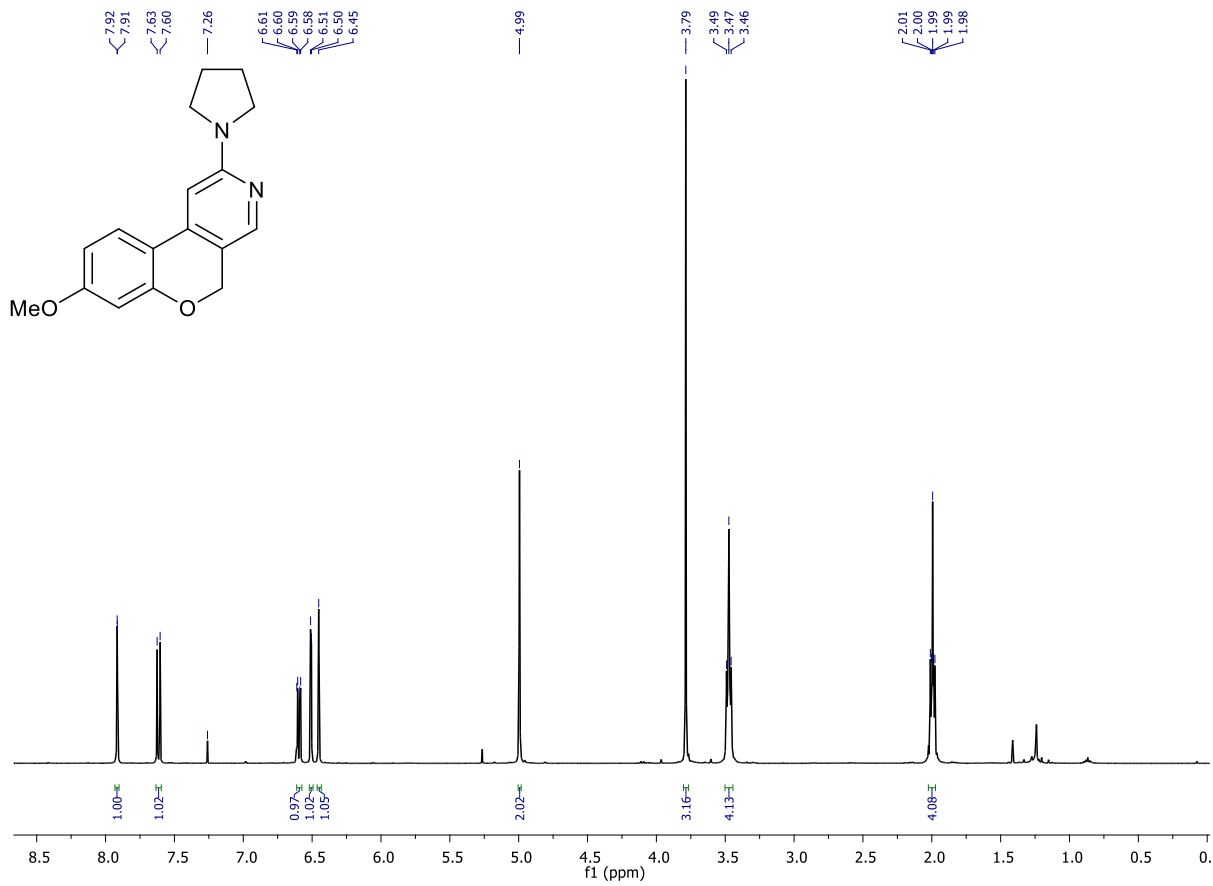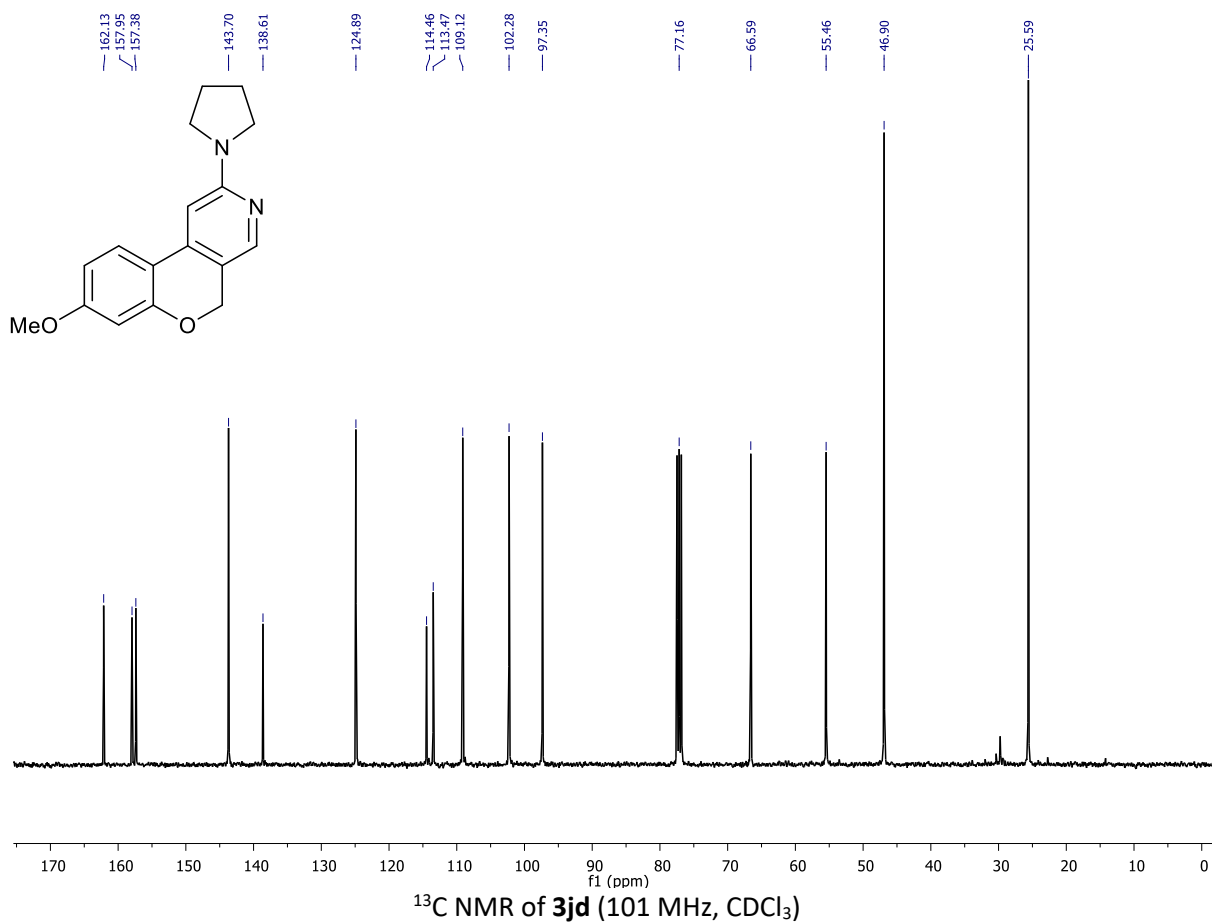

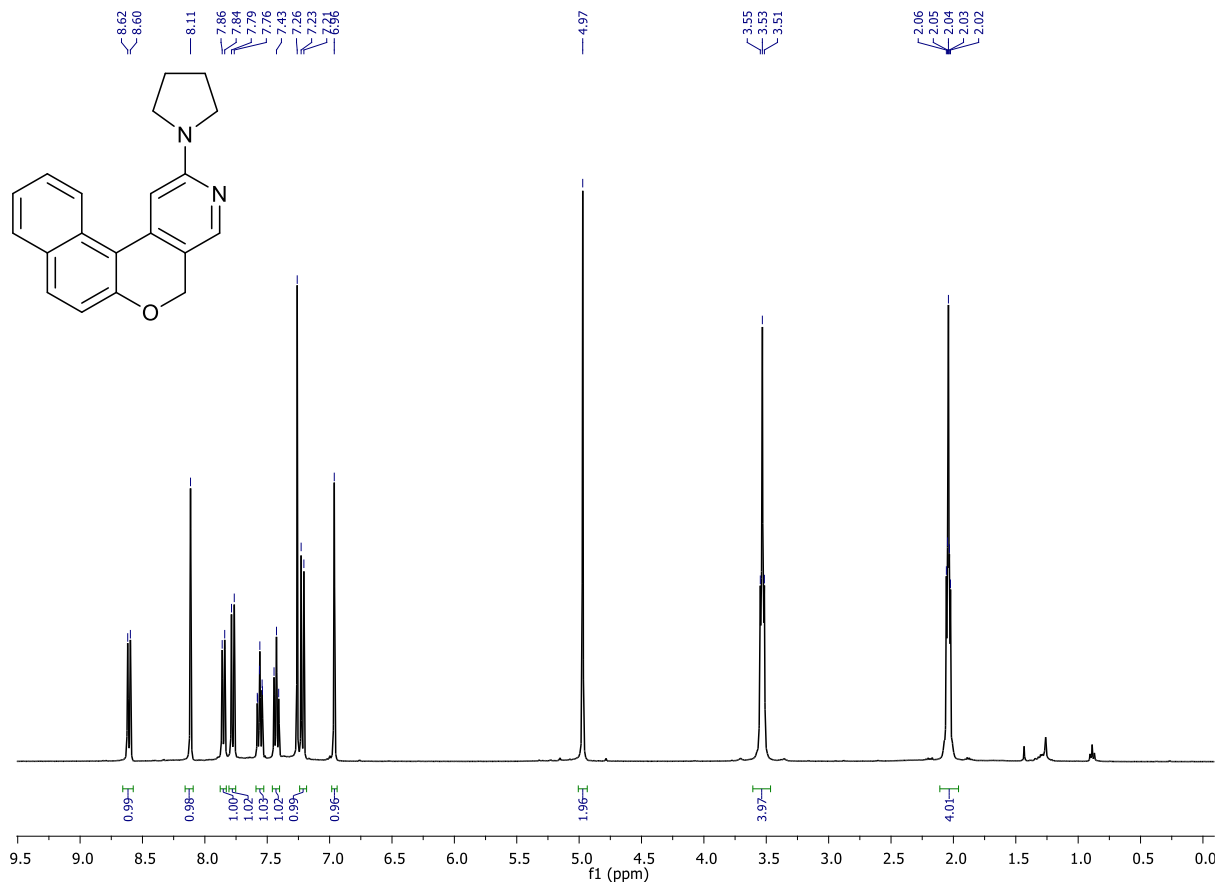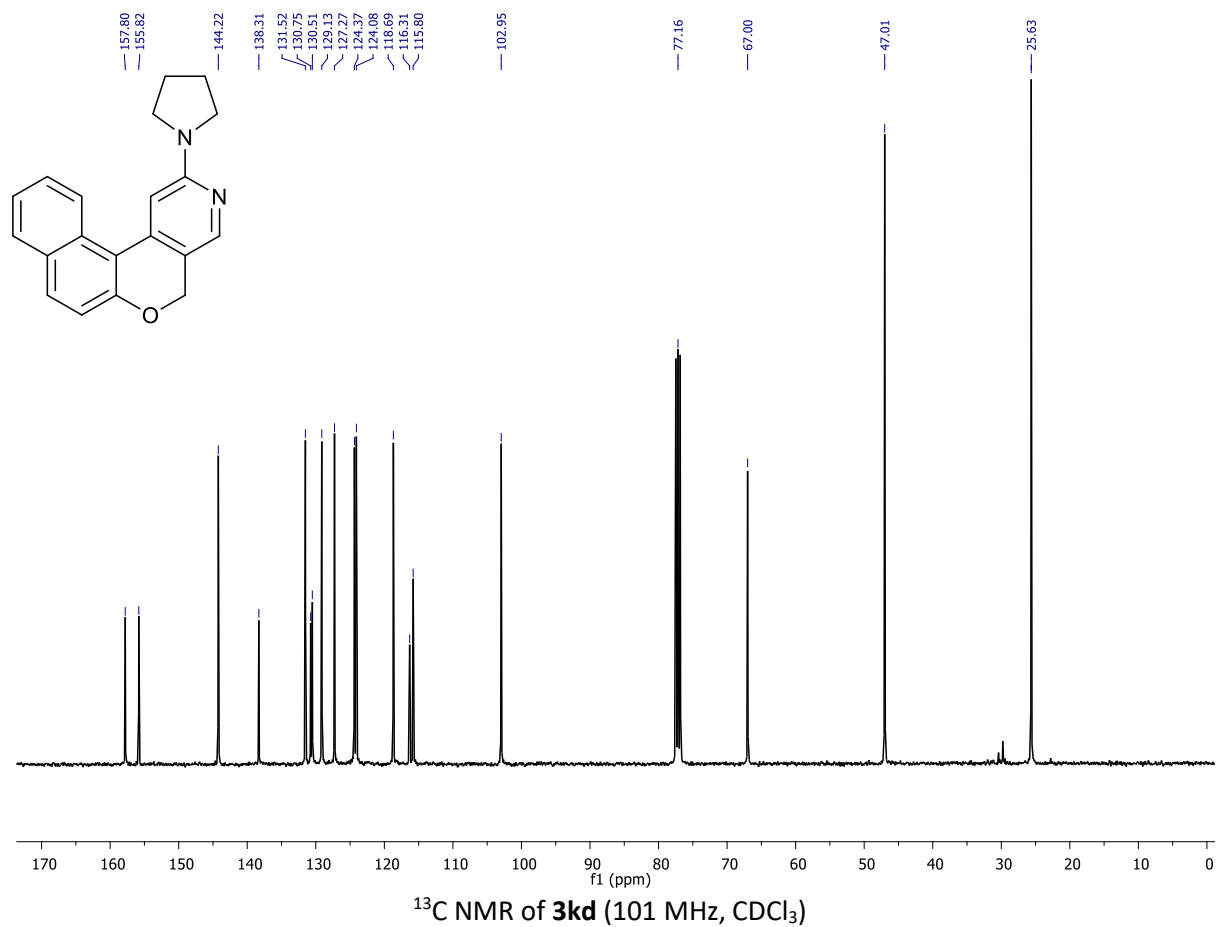

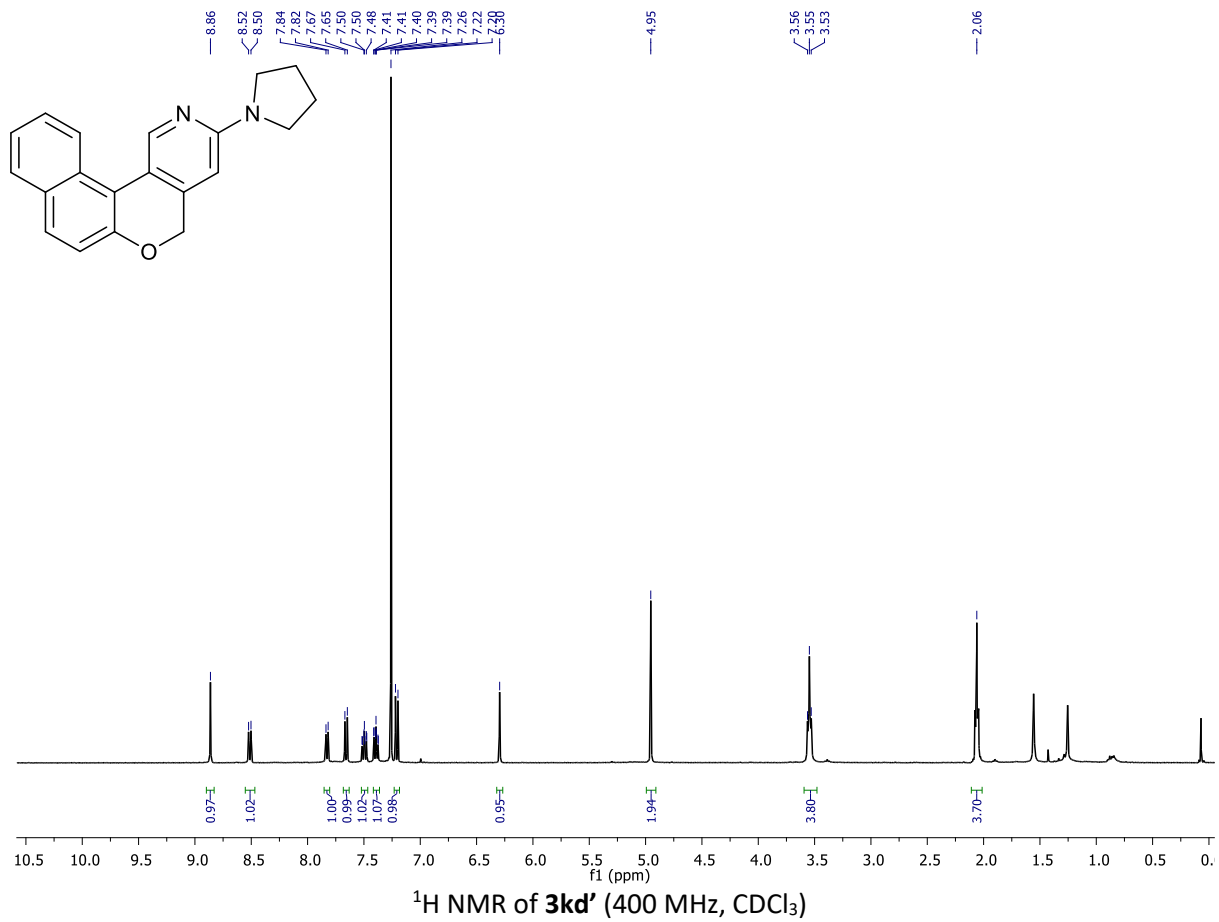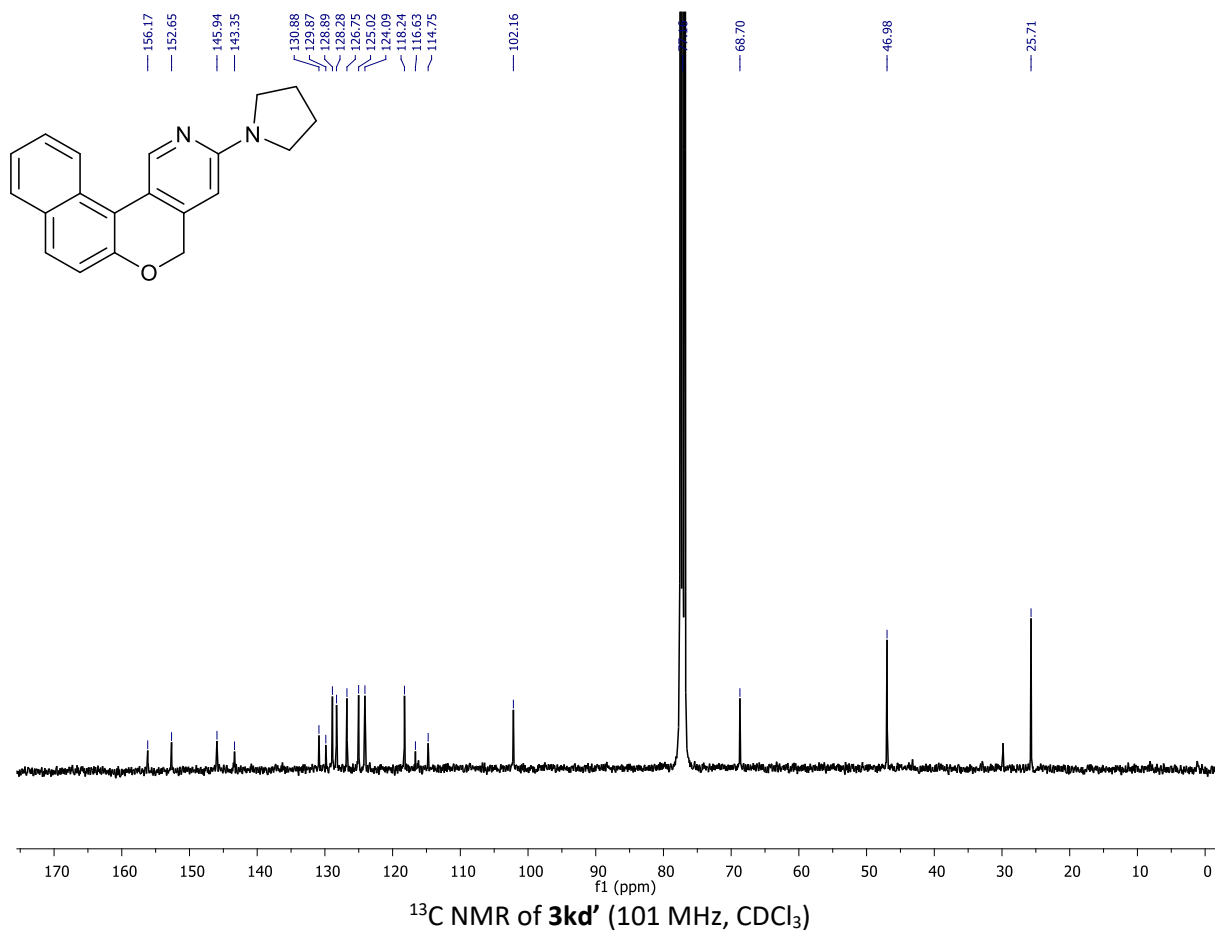

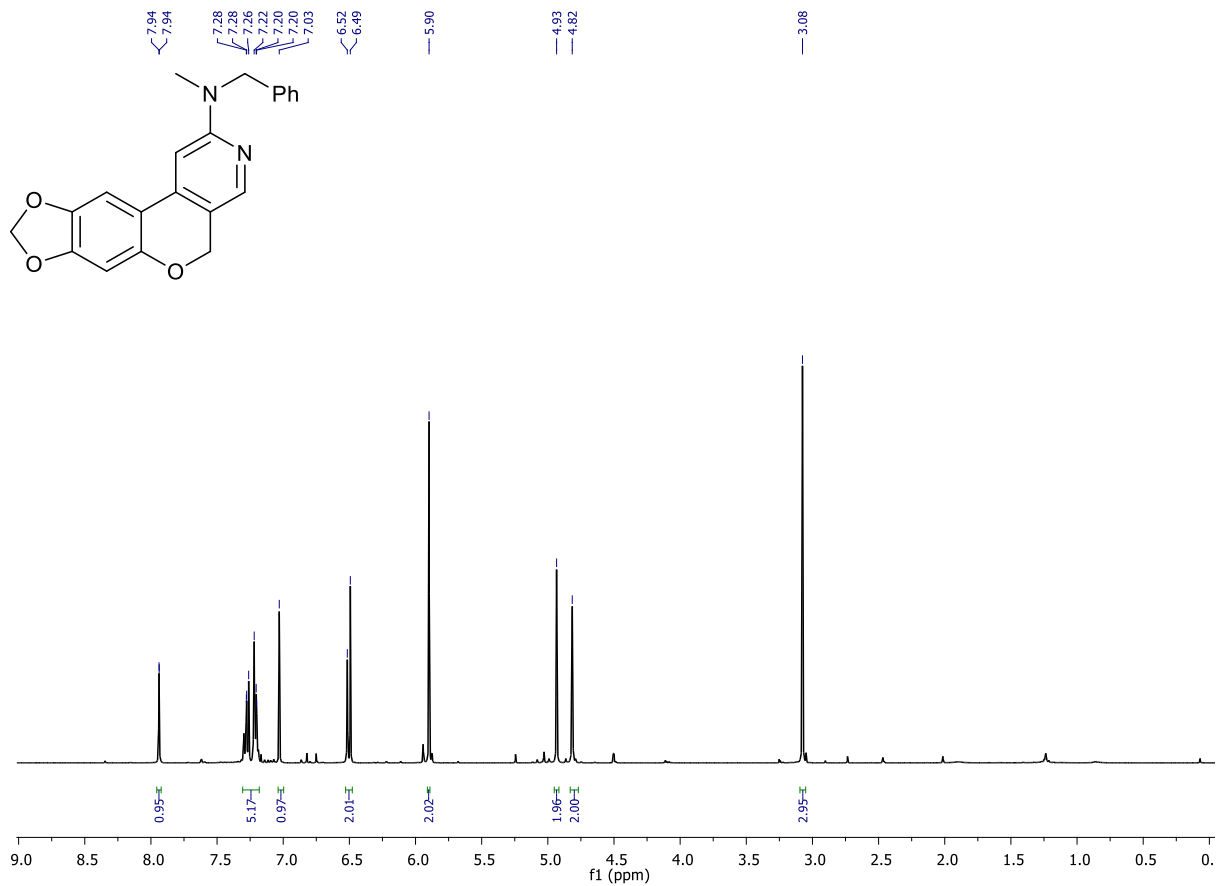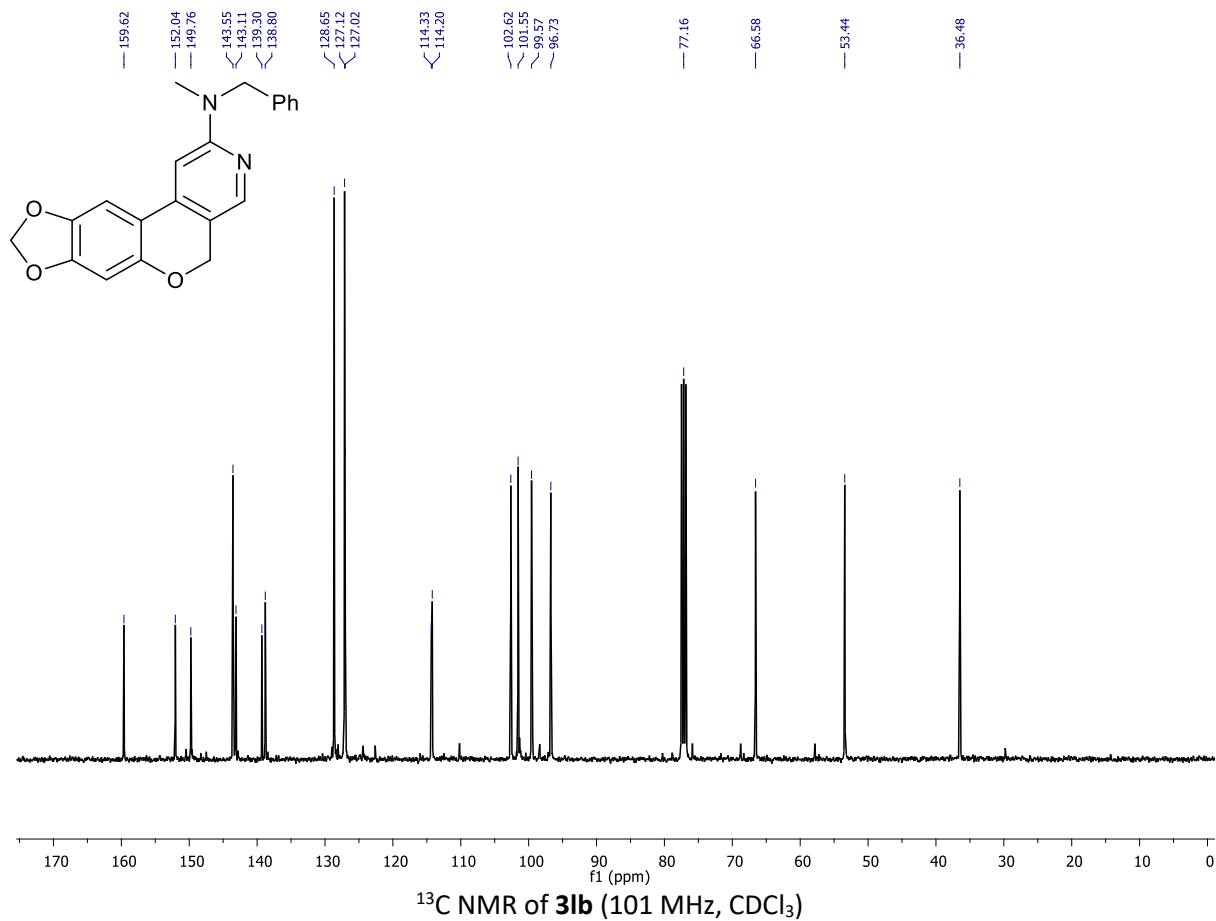



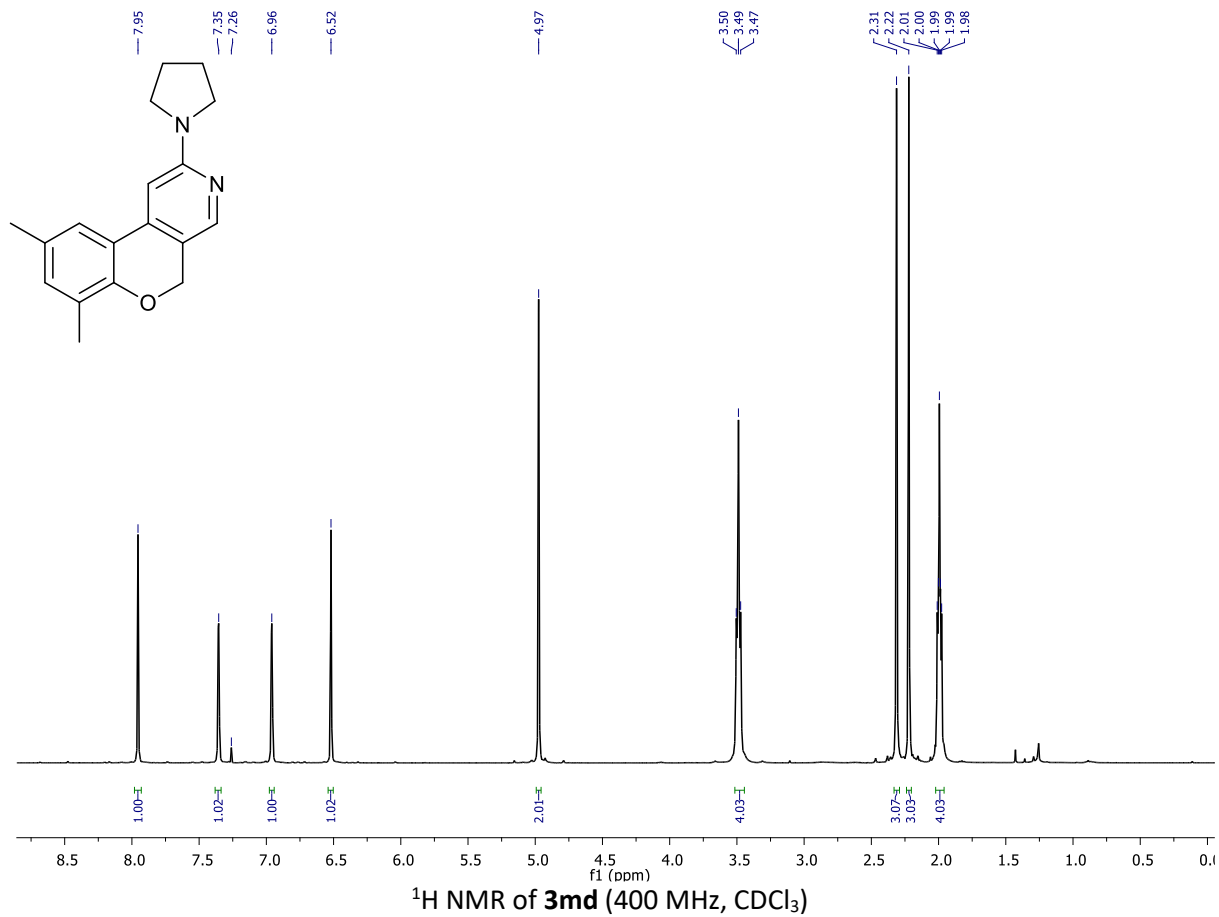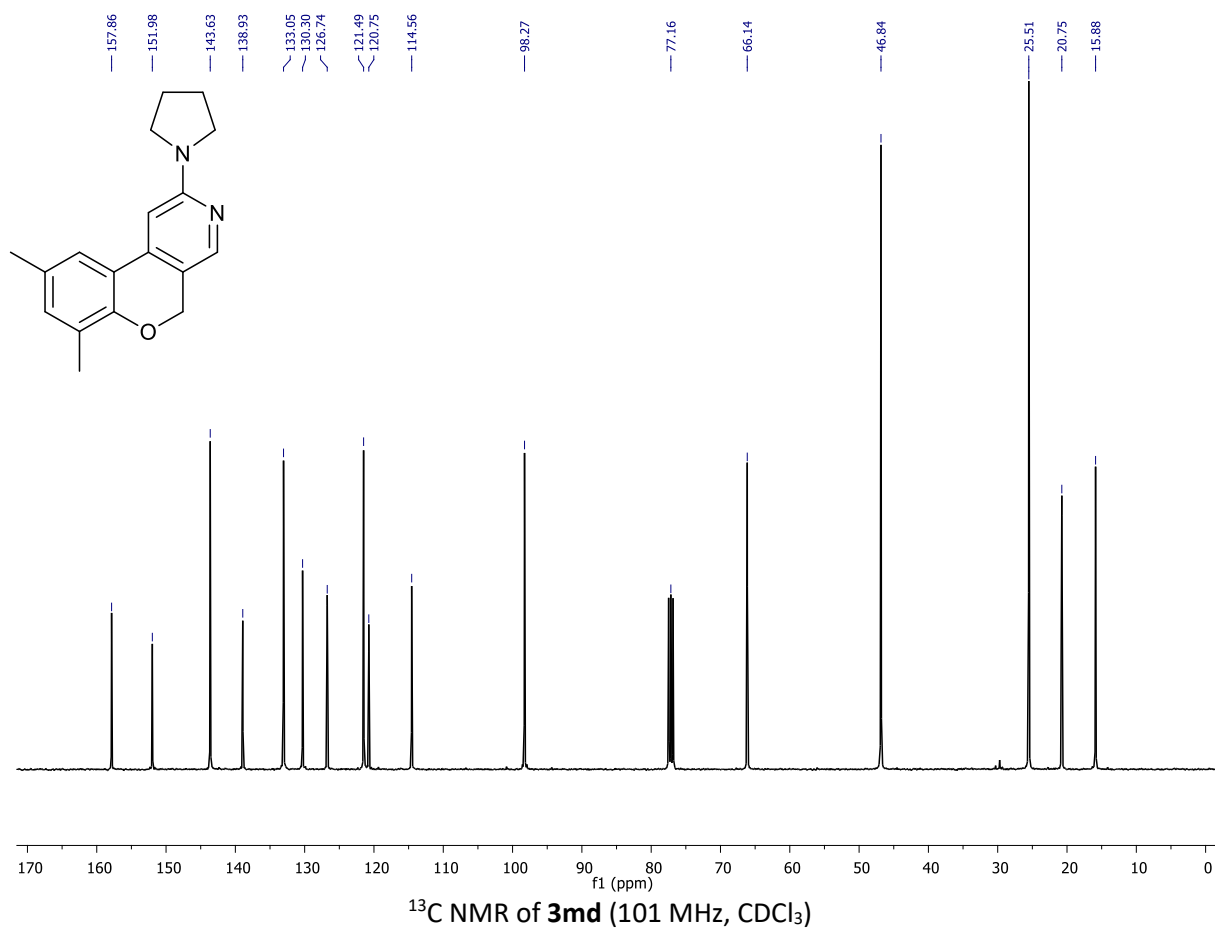

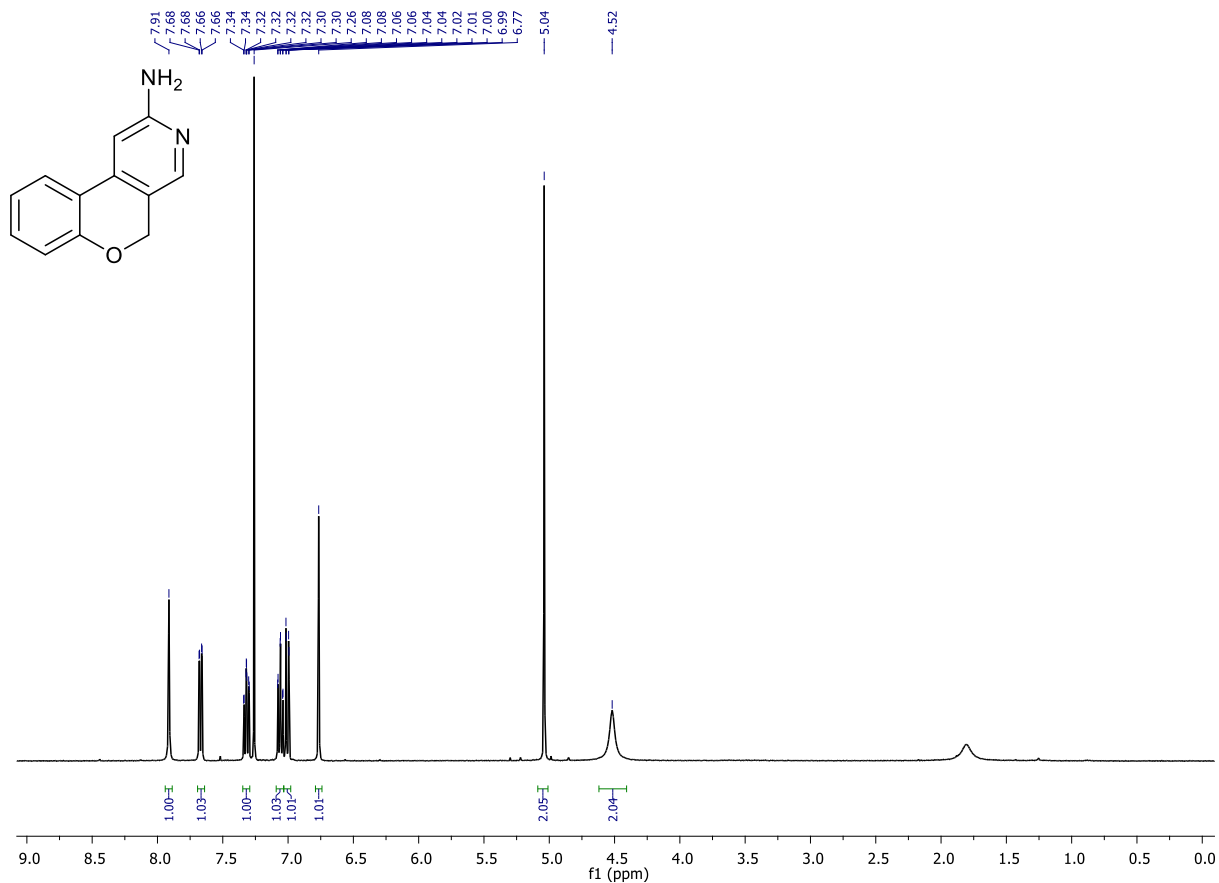

$^1\text{H}$  NMR of **3af** (400 MHz,  $\text{CDCl}_3$ )

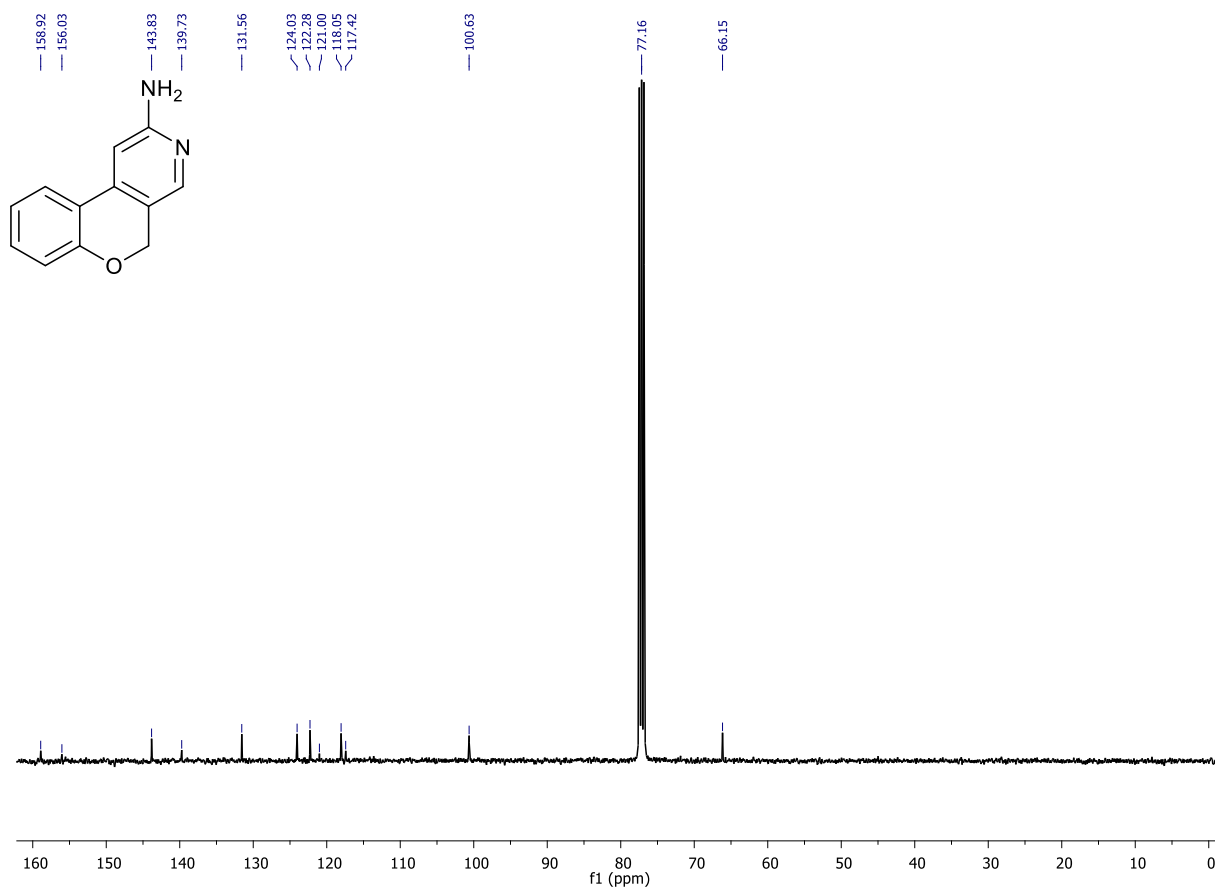

$^{13}\text{C}$  NMR of **3af** (101 MHz,  $\text{CDCl}_3$ )

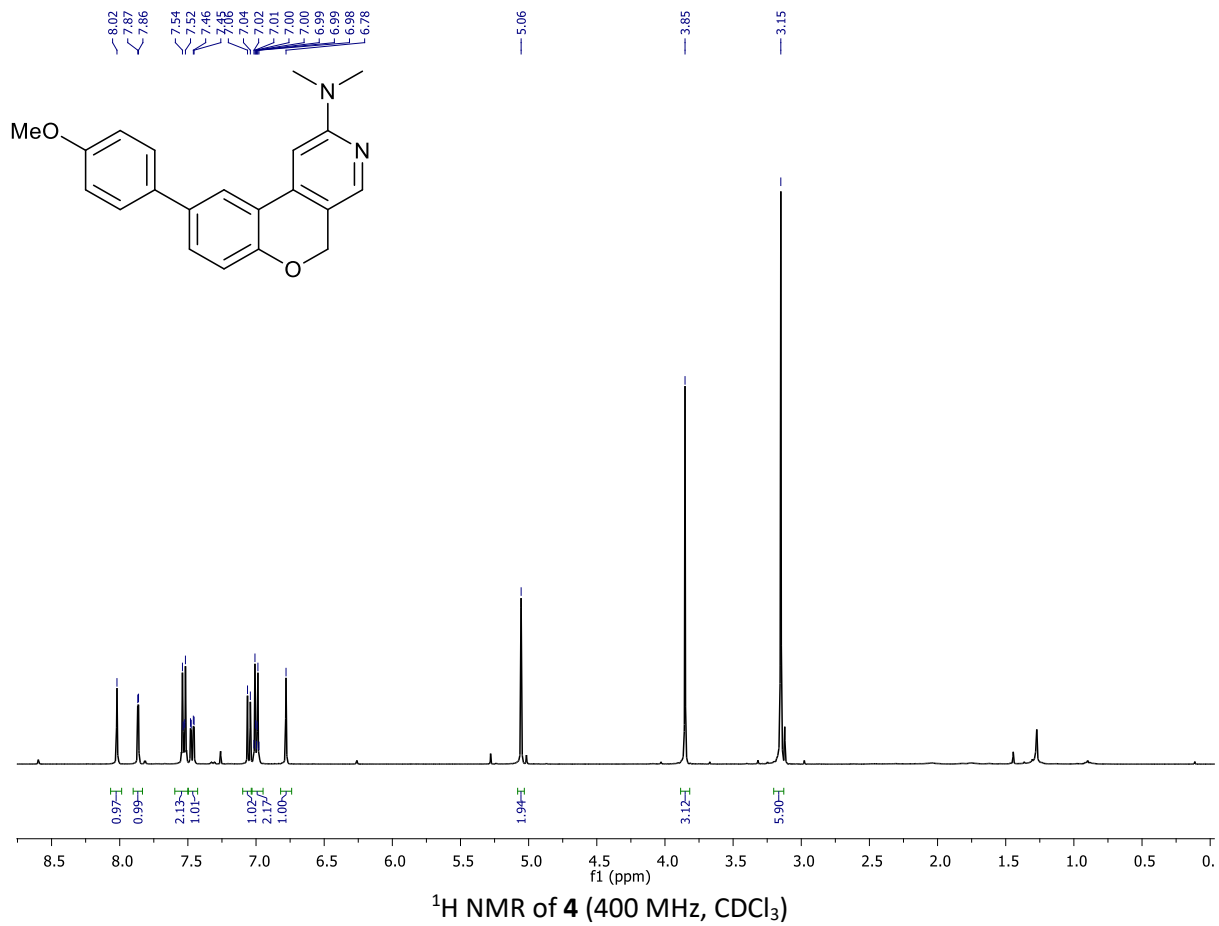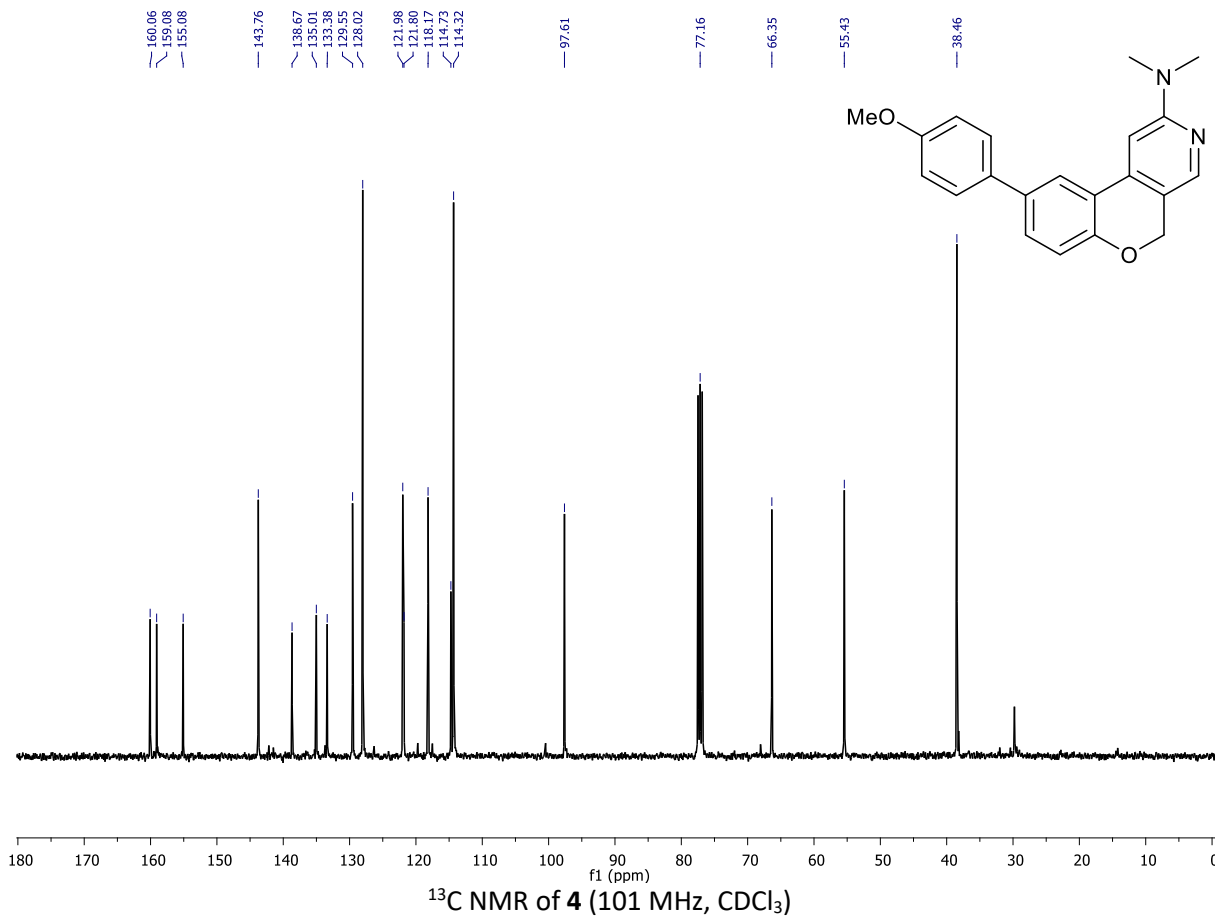

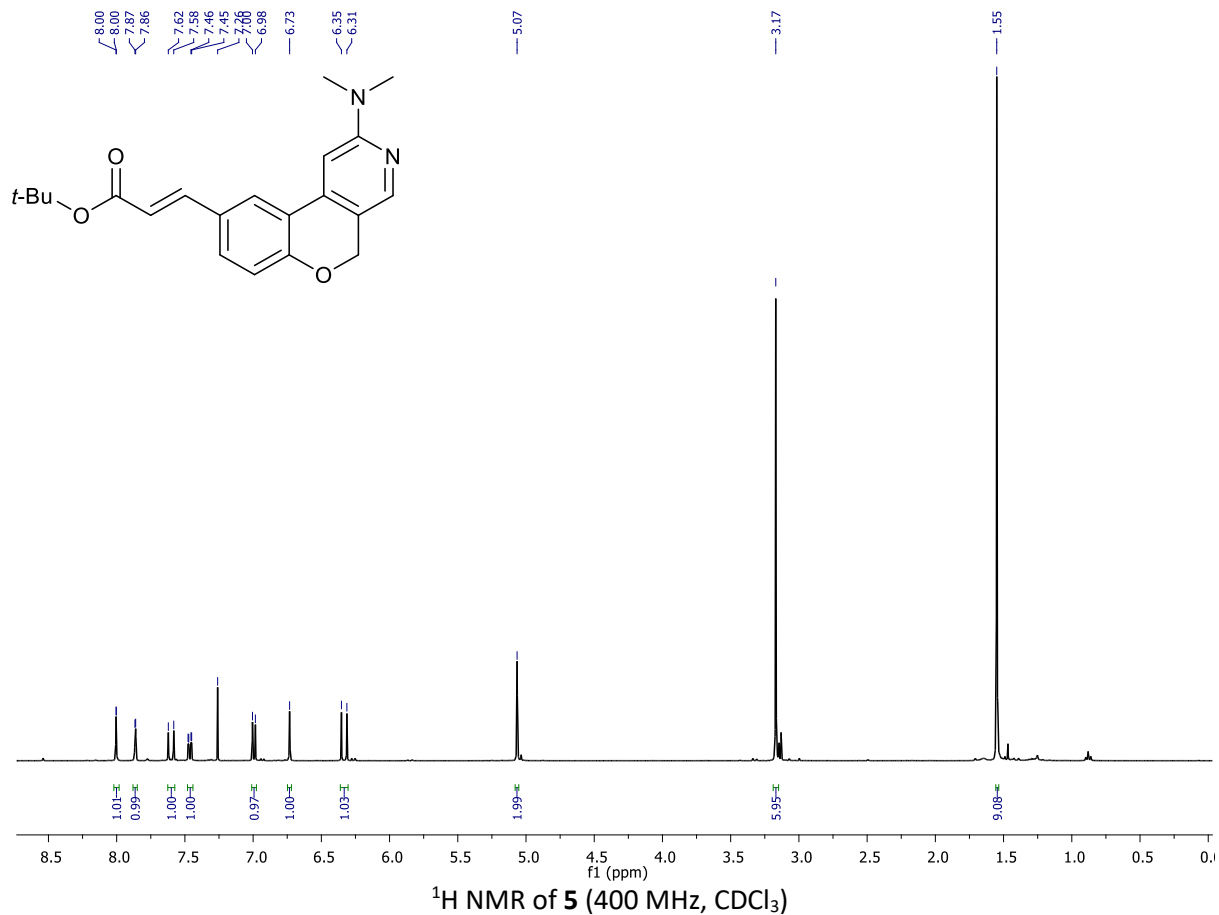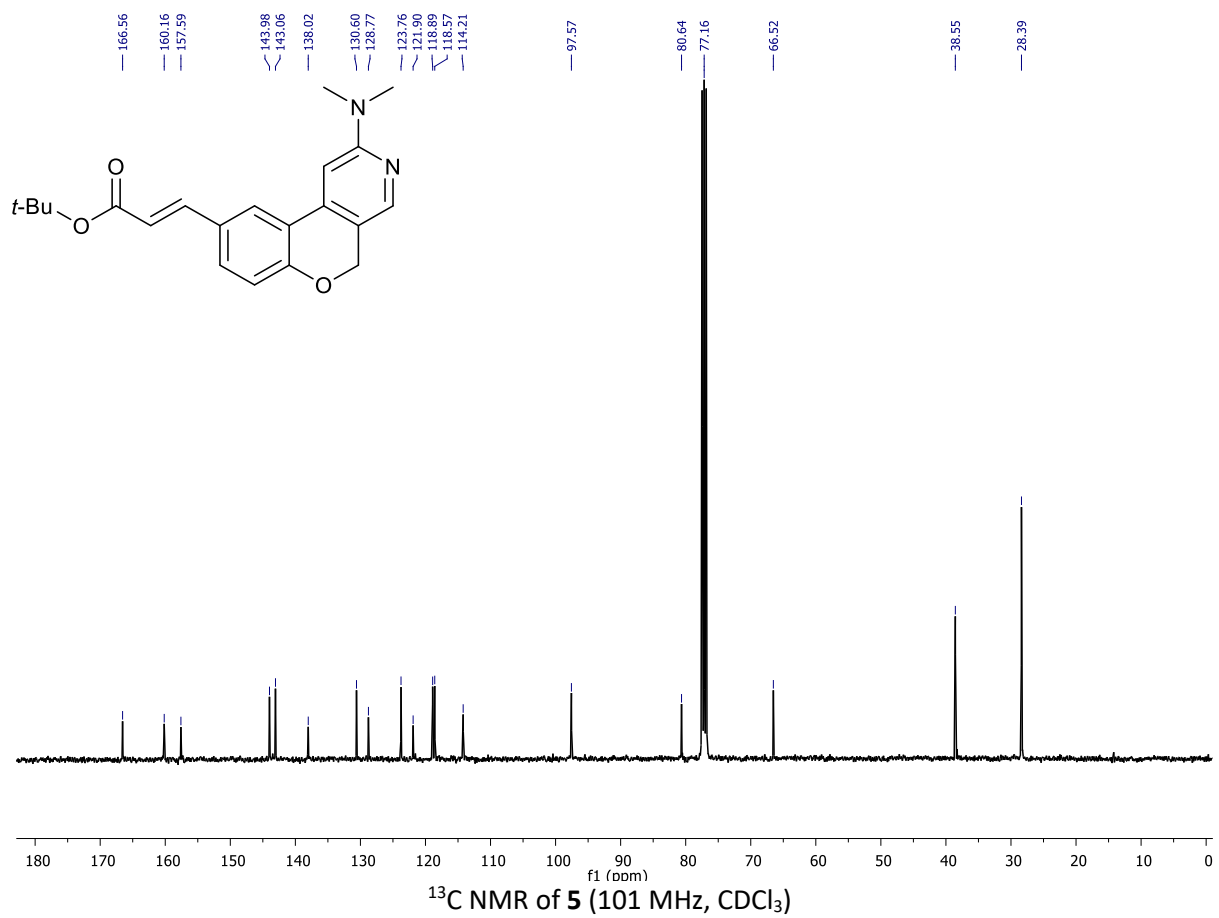

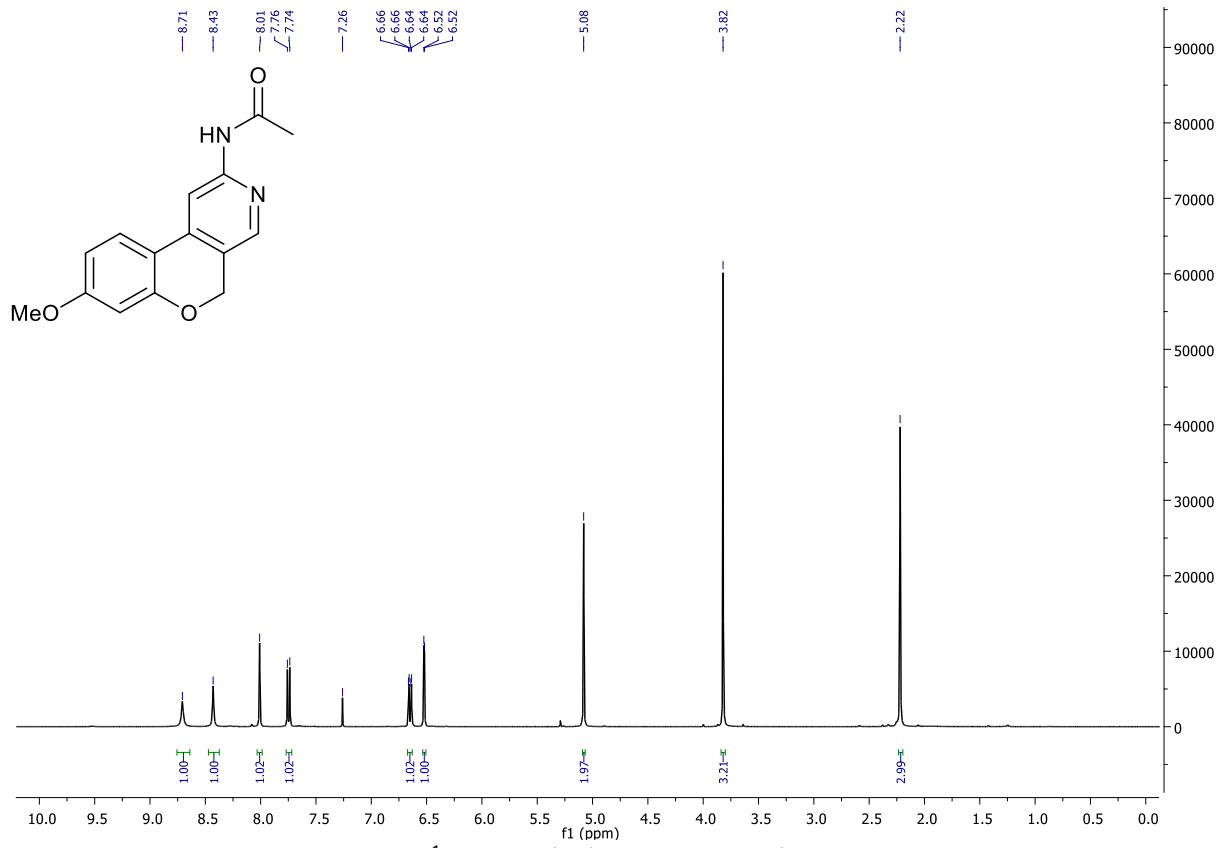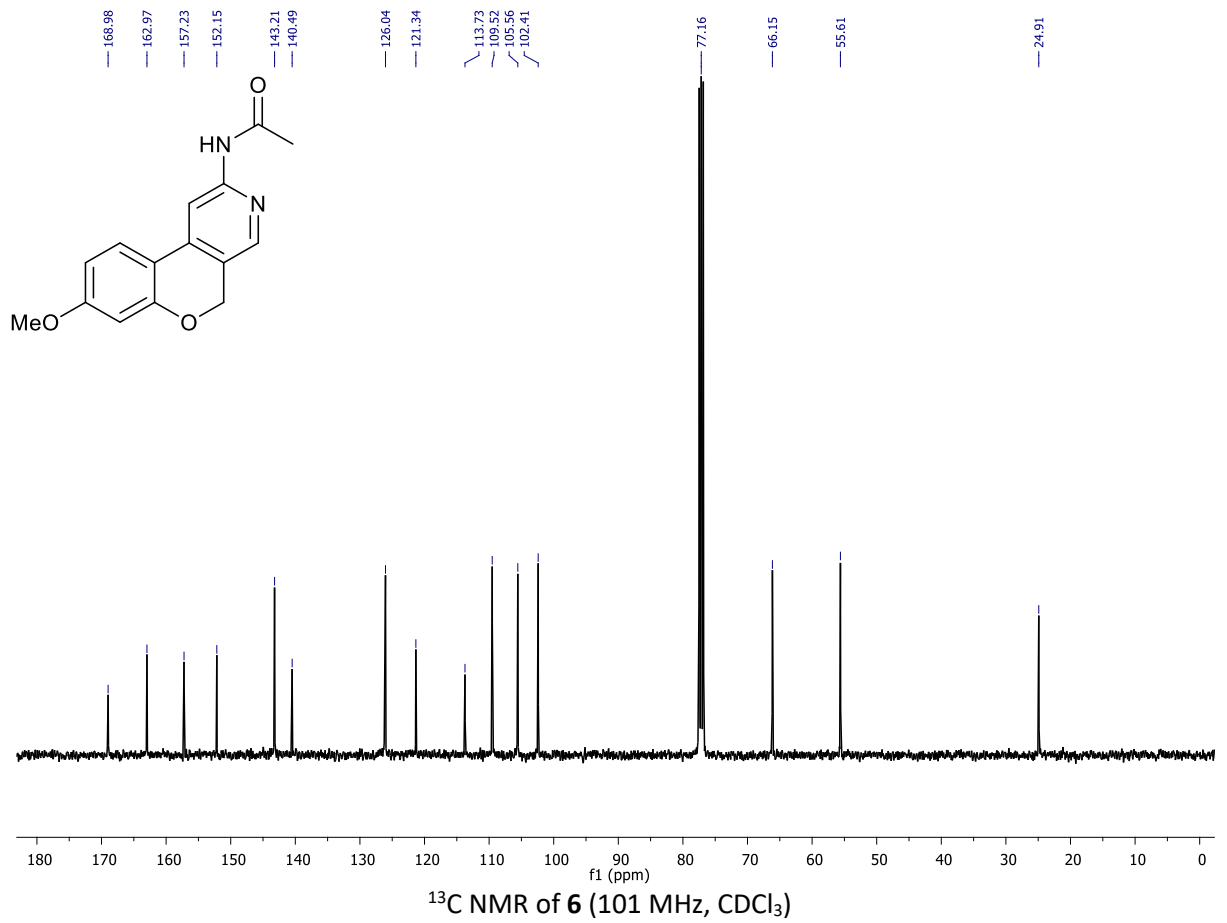

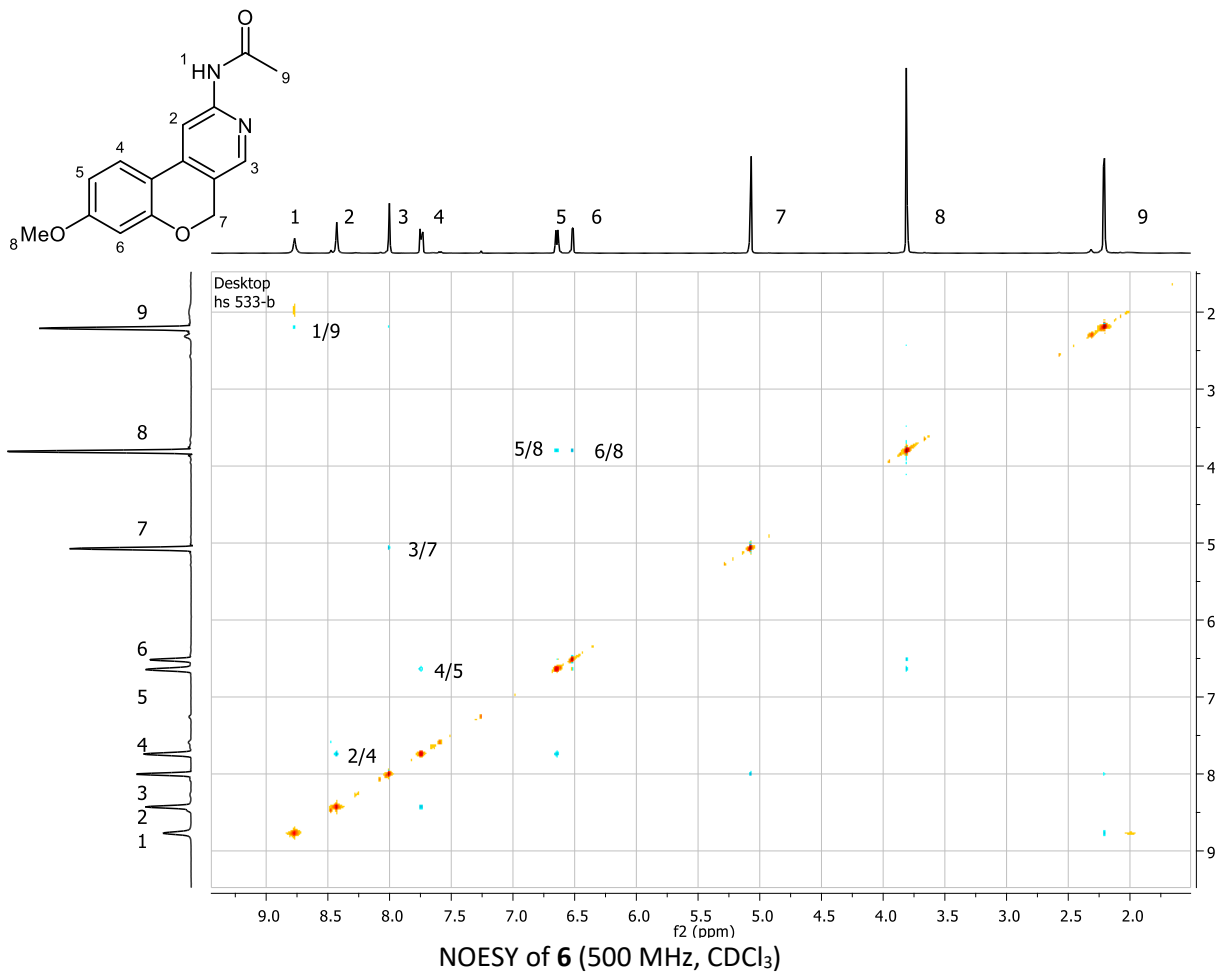

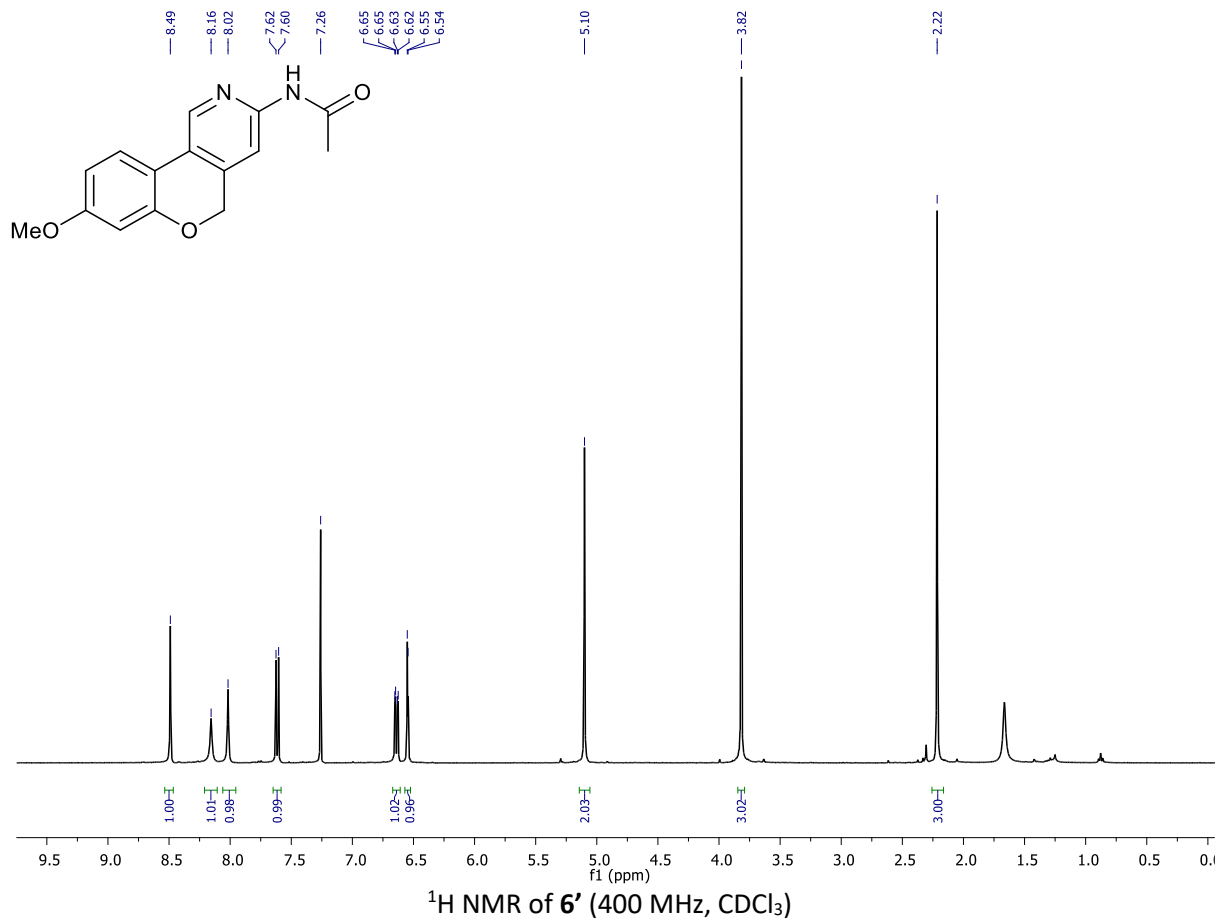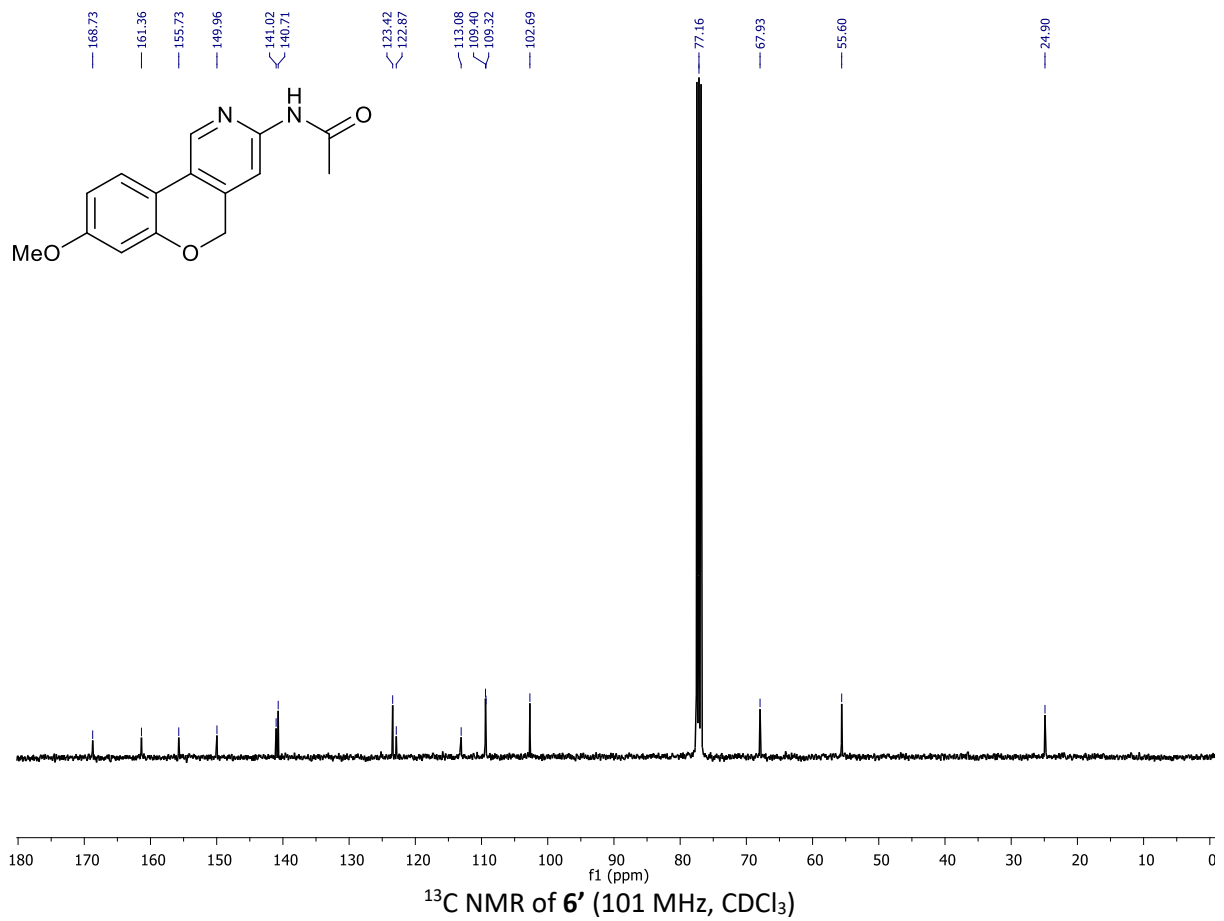

## VII. X-Ray crystallographic data for compound **3aa**

A saturated solution of 10 mg of compound **3aa** in CH<sub>2</sub>Cl<sub>2</sub> was introduced into a 1 mL vial. This vial was then placed in a 10 mL vial already containing 2 mL of hexane and the system was closed. The vapour diffusion was let to happen at room temperature for 2 weeks, leading to long-needle crystals.

### 1. X-Ray crystal structure determination

For **3aa** a single crystal was selected, mounted, and transferred into a cold nitrogen gas stream. Intensity data was collected with a Bruker Kappa-APEX2 system using micro-source Cu-K $\alpha$  radiation. Unit-cell parameters determination, data collection strategy, integration and absorption correction were carried out with the Bruker APEX2 suite of programs. The structure was solved with SHELXT and refined anisotropically by full-matrix least-squares methods with SHELXL using WinGX. Absolute structure couldn't be reliably determined by anomalous scattering effects analysis. The structure was deposited at the Cambridge Crystallographic Data Centre with number CCDC 2192543 and can be obtained free of charge via [www.ccdc.cam.ac.uk](http://www.ccdc.cam.ac.uk).



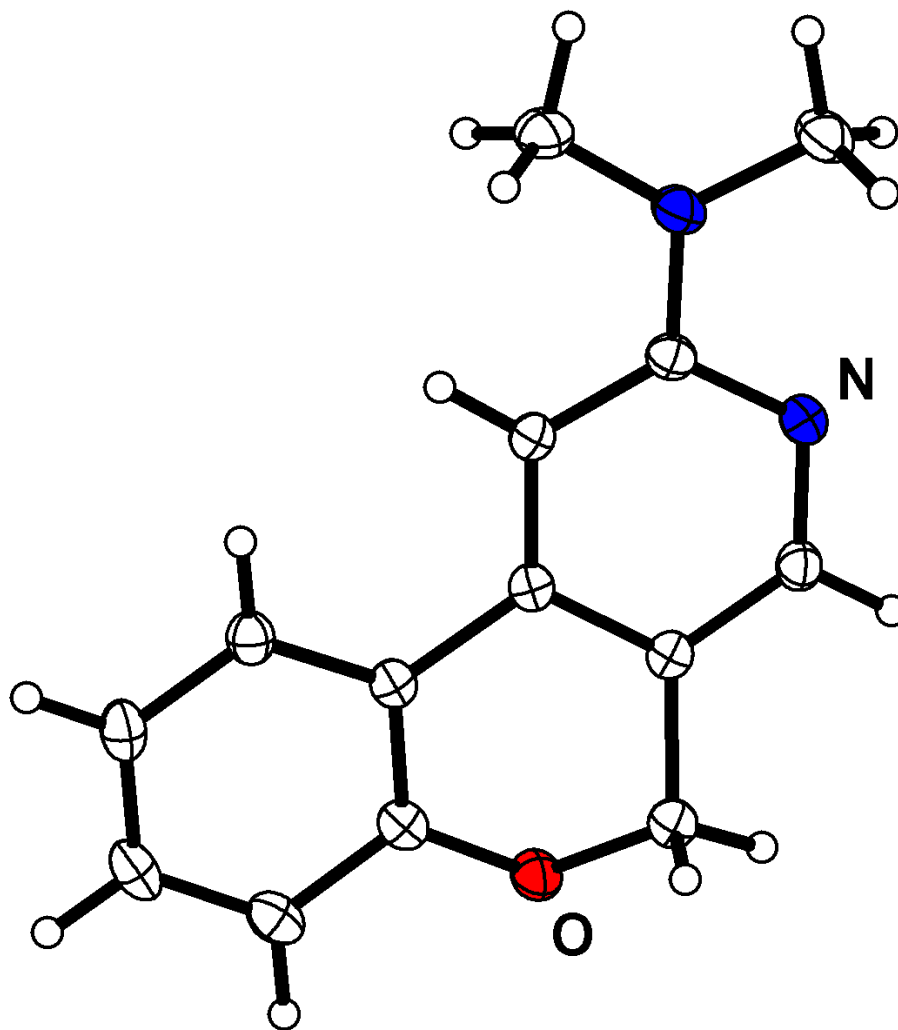

**Figure 1** : Crystal structure representation of **3aa**.

Ellipsoids are drawn with 30% probability. All hydrogen atoms are omitted for the sake of clarity.

## 2. Crystal data for **3aa**

Orthorhombic  $Pnca$ ,  $a = 18.0753(4)$  Å,  $b = 6.5874(1)$  Å,  $c = 9.4903(2)$  Å,  $\alpha = \beta = \gamma = 90^\circ$ ,  $V = 1130.00(4)$  Å<sup>3</sup>,  $Z = 4$ , pale yellow plate  $0.4 \times 0.2 \times 0.02$  mm<sup>3</sup>,  $\mu = 0.679$  mm<sup>-1</sup>, min / max transmission = 0.55 / 0.75,  $T = 200(1)$  K,  $\lambda = 1.54178$  Å,  $\theta$  range =  $4.90^\circ$  to  $66.58^\circ$ , 7941 reflections measured, 1985 independent,  $R_{int} = 0.0258$ , completeness = 1.000, 156 parameters, 1 restraints, Flack  $x = 0.3(2)$ , final R indices  $R_1 [I > 2\sigma(I)] = 0.0297$  and  $wR_2$  (all data) = 0.0831, GOF on  $F_2 = 1.068$ , largest difference peak / hole = 0.15 / -0.12 e<sup>-</sup>Å<sup>-3</sup>.
